# Supplementary material
Source: PubMed Central journal article supplement (PMC11323223)
Supplement: NIHMS1859445-supplement-Supplementary_Material.pdf [file NIHMS1859445-supplement-Supplementary_Material.pdf]

# Supplementary Material

## SAR Study on Novel Truxillic Acid Monoester -Based Inhibitors of Fatty Acid Binding Proteins as Next-Generation Antinociceptive Agents

Hehe Wang<sup>a</sup>, Adam Taouil<sup>a</sup>, Monaf Awwa<sup>a</sup>, Timothy Clement<sup>a</sup>, Chuanzhou Zhu<sup>a</sup>, Jinwoo Kim<sup>a</sup>, Dominick Rendina<sup>a</sup>, Kalani Jayanetti<sup>a</sup>, Atri Maharaj<sup>a</sup>, Liqun Wang<sup>b</sup>, Diane Bogdan<sup>b</sup>, Antonella Pepe<sup>a</sup>, Martin Kaczocha<sup>b,c</sup>, and Iwao Ojima<sup>a,c,\*</sup>

<sup>a</sup> Department of Chemistry, Stony Brook University, Stony Brook, NY, 11794-3400, United states

<sup>b</sup> Departments of Biochemistry and Cell Biology, Stony Brook University, Stony Brook, NY, 11794-5215, United states

<sup>c</sup> Institute of Chemical Biology and Drug Discovery, Stony Brook University, Stony Brook, NY, 11794-3400, United states

### Table of Contents

|                                                                                                                                                             |           |
|-------------------------------------------------------------------------------------------------------------------------------------------------------------|-----------|
| AutoDock 4.2 calculation parameters .....                                                                                                                   | S2        |
| Figure S1 and Table S1.....                                                                                                                                 | S3        |
| Figure S2 and Figure S3 .....                                                                                                                               | S4        |
| Figure S4 and Figure S5 .....                                                                                                                               | S5        |
| Figure S6 .....                                                                                                                                             | S6        |
| Table S2 .....                                                                                                                                              | S7-S8     |
| Table S3 .....                                                                                                                                              | S9-S11    |
| Table S4 .....                                                                                                                                              | S12       |
| Scheme S1 .....                                                                                                                                             | S13       |
| Scheme S2 and Scheme S3 .....                                                                                                                               | S14       |
| Procedures for the synthesis of hydroxybiphenyls <b>A1</b> ~ <b>A18</b> , 9-fluorenemethanols <b>A19</b> , <b>A20</b> and their characterization data ..... | S15~S20   |
| References .....                                                                                                                                            | S21       |
| <sup>1</sup> H, <sup>13</sup> C and <sup>19</sup> F NMR Spectra of TAMEs and key intermediates .....                                                        | S22~S106  |
| HPLC purities of the five compounds examined <i>in vivo</i> .....                                                                                           | S107-S109 |
| Examples of the HPLC purities of other compounds examined <i>in vitro</i> for affinities to FABP3, 5 and 7 .....                                            | S110-S112 |

---

\* Corresponding author. Department of Chemistry, Stony Brook University, Stony Brook, NY 11794, United States.

E-mail: [iwao.ojima@stonybrook.edu](mailto:iwao.ojima@stonybrook.edu)

## Autodock 4.2 Parameters

- **Docking (Lamarckian Genetic Algorithm)**

```
rmstol 2.0           # cluster_tolerance/A
extnrg 1000.0        # external grid energy
e0max 0.0 10000      # max initial energy; max number of retries
ga_pop_size 150      # number of individuals in population
ga_num_evals 2500000 # maximum number of energy evaluations
ga_num_generations 27000 # maximum number of generations
ga_elitism 1         # number of top individuals to survive to next generation
ga_mutation_rate 0.02 # rate of gene mutation
ga_crossover_rate 0.8 # rate of crossover
ga_window_size 10    #
ga_cauchy_alpha 0.0  # Alpha parameter of Cauchy distribution
ga_cauchy_beta 1.0   # Beta parameter Cauchy distribution
set_ga               # set the above parameters for GA or LGA
sw_max_its 300       # iterations of Solis & Wets local search
sw_max_succ 4        # consecutive successes before changing rho
sw_max_fail 4        # consecutive failures before changing rho
sw_rho 1.0           # size of local search space to sample
sw_lb_rho 0.01       # lower bound on rho
ls_search_freq 0.06  # probability of performing local search on individual
set_psw1             # set the above pseudo-Solis & Wets parameters
unbound_model bound  # state of unbound ligand
ga_run 10            # do this many hybrid GA-LS runs
```

- **Energy Minimization Parameters**

```
rmstol 1.0           # cluster_tolerance/A
extnrg 1000.0        # external grid energy
e0max 0.0 10000      # max initial energy; max number of retries
ga_pop_size 1500     # number of individuals in population
sw_max_its 30000     # iterations of Solis & Wets local search
sw_max_succ 20       # consecutive successes before changing rho
sw_max_fail 20       # consecutive failures before changing rho
sw_rho 1000.0        # size of local search space to sample
sw_lb_rho 0.01       # lower bound on rho
set_psw1             # set the above pseudo-Solis & Wets parameters
unbound_model bound  # state of unbound ligand
do_local_only 50     # do this many
```

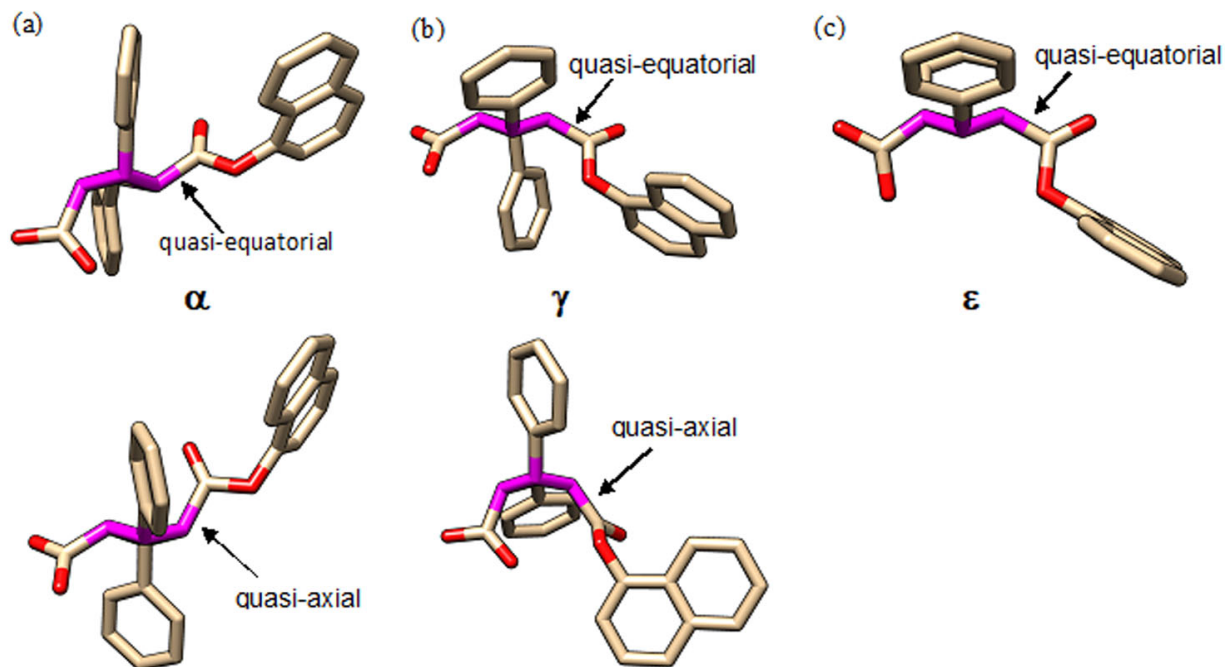

**Figure S1.** 3D structures of (a)  $\alpha$ -L1, (b)  $\gamma$ -L1 and (c)  $\epsilon$ -L1 isomers with its ester moiety in the quasi-equatorial or quasi-axial conformation for  $\alpha$ -L1 and  $\gamma$ -L1, and that in the quasi-equatorial conformation for  $\epsilon$ -L1 (quasi-axial configuration is energetically impossible due to severe steric clash).

**Table S1.** Internal energy  $E$  (kcal/mol) of ( $\alpha$ ,  $\gamma$ ,  $\epsilon$ )-L1 in quasi-axial and quasi-equatorial ester conformations\*

| Isomer     | quasi-axial ester | quasi-equatorial ester | $\Delta E$ |
|------------|-------------------|------------------------|------------|
| $\alpha$   | 82.1              | 77.1                   | 5.0        |
| $\gamma$   | 92.0              | 81.0                   | 11.0       |
| $\epsilon$ | N/A               | 70.5                   | N/A        |

\*Calculated at their energy minima using the MMFF94 forcefield. The energy minimum of the quasi-axial conformation of the  $\epsilon$ -isomer was not found. This conformation is impossible to take due to serious steric clash.

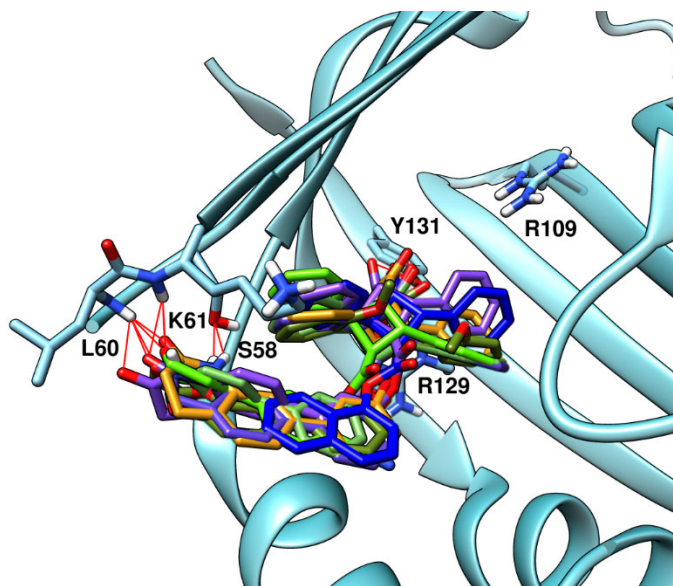

**Figure S2.** Docking pose of L1 (dark blue),  $\alpha$ -1,  $\alpha$ -5,  $\alpha$ -7,  $\alpha$ -8,  $\alpha$ -9 and  $\alpha$ -10 at the canonical binding site (Tyr131-Arg129-Arg109) of FABP5 (cyan).

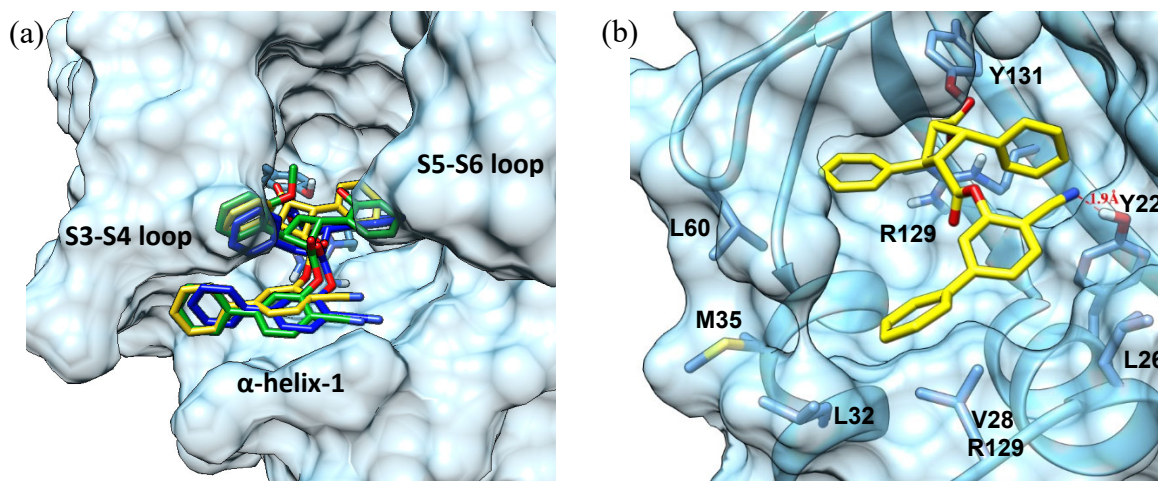

**Figure S3.** (a) Docking poses of  $\alpha$ -3 (yellow),  $\alpha$ -4 (green), and  $\gamma$ -3 (dark blue) at the canonical binding site (Tyr131-Arg129, Arg109) of FABP5 (light blue); (b) Docking pose of  $\gamma$ -3 (yellow) at the canonical binding site (Tyr131, Arg129) of FABP5 with an additional H-bonding of the cyano nitrogen with Tyr22.

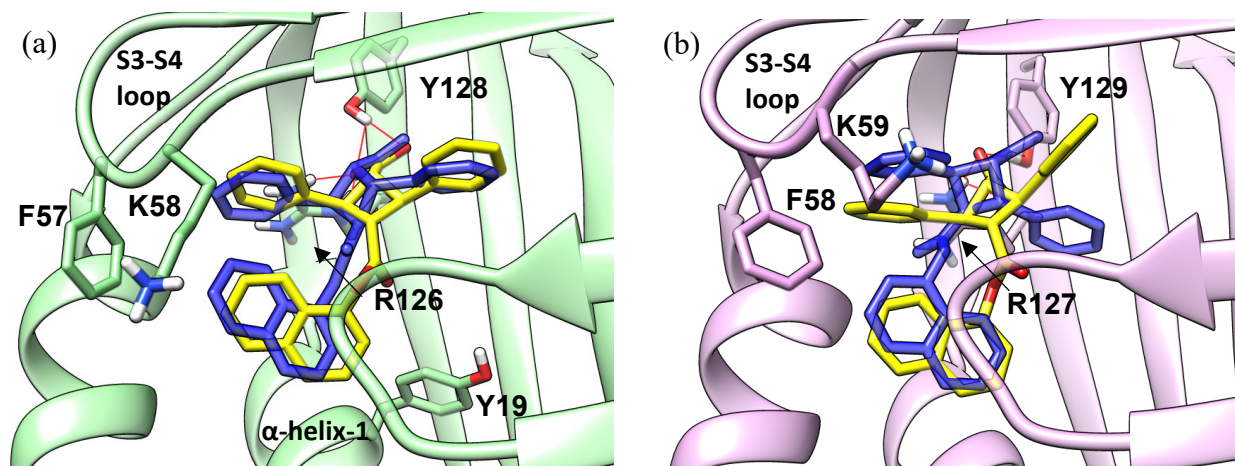

**Figure S4.** (a) Overlay of  $\epsilon$ -202 (yellow) and L1 (blue) at the canonical binding site (Tyr128, Arg126) of FABP3 and (b) Overlay of  $\epsilon$ -202 (yellow) and L1 (blue) at the canonical binding site (Tyr129, Arg127) of FABP7.

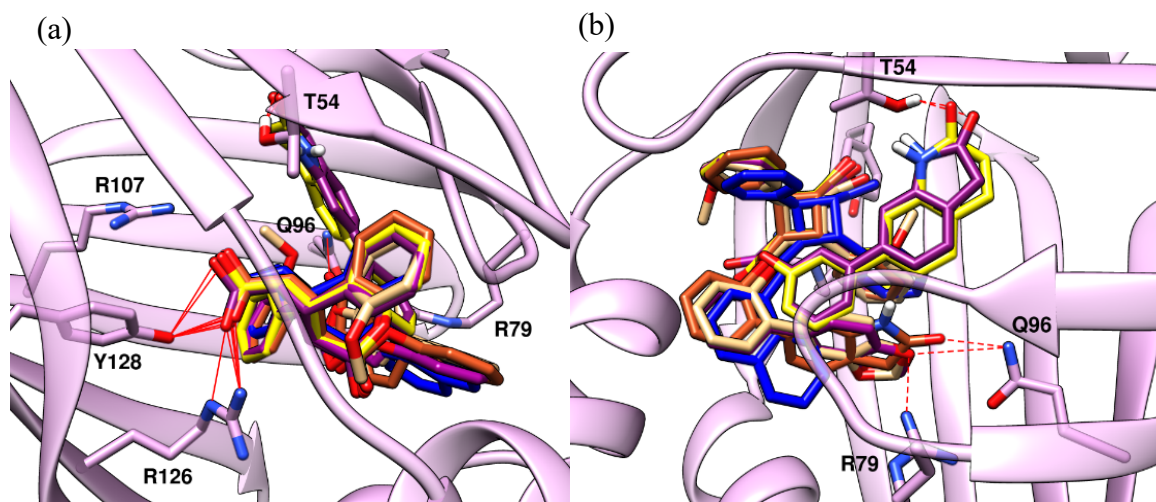

**Figure S5.** Docking poses of  $\alpha$ -2,  $\alpha$ -18,  $\alpha$ -11,  $\alpha$ -8,  $\alpha$ -1 and L1 (cocrystal structure for comparison) at the canonical binding site (Tyr128, Arg126) of FABP7. (a) A view of the canonical interactions with Tyr128 and Arg126 (b) A view of the interactions of the H-bond acceptors in the distal biphenyl ester moieties with Thr54, Arg79, and Gln96.

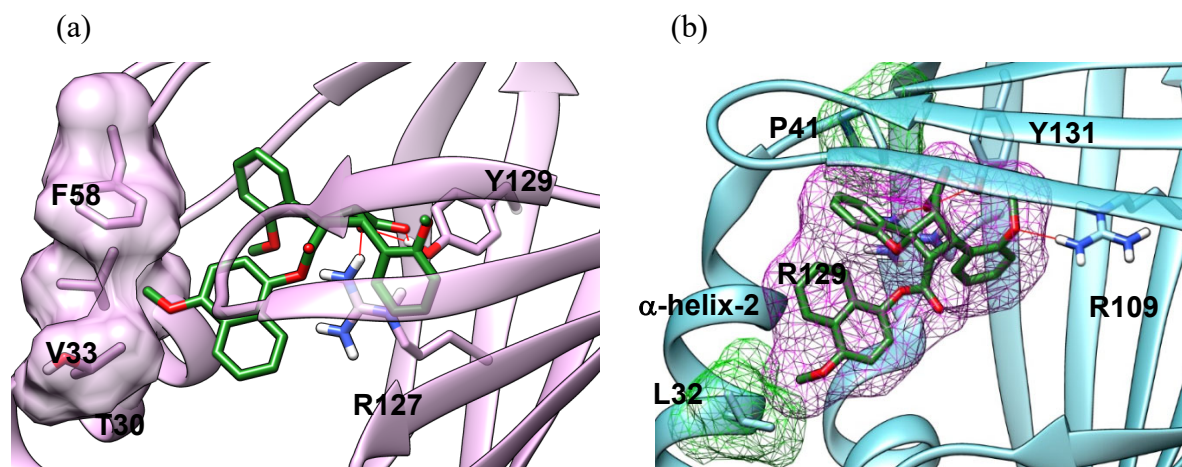

**Figure S6.** (a) Docking pose of  $\gamma$ -109 (green) in the canonical binding site (Tyr129, Arg127) of FABP7. (b) Docking pose of  $\gamma$ -109 (green) in FABP5. The clash of the 4-MeO group with Leu32 and Met35 in the  $\alpha$ -helix-2 leads to the substantial weakening of the canonical interaction of the carboxylic acid moiety with Arg129 and Tyr131.

**Table S2.** Docking energy scores of TAMEs for FABP3, 5 and 7; pkCSM predictions of AMES, hERG1 and LD<sub>50</sub> values; ClogP values predicted by ChemDraw.

|     | TAMEs        | FABP5<br>Ki (μM) | FABP5<br>(kcal/mol) | FABP3<br>(kcal/mol) | FABP7<br>(kcal/mol) | AMES | hERG1 | LD <sub>50</sub><br>(mol/kg) | ClogP |
|-----|--------------|------------------|---------------------|---------------------|---------------------|------|-------|------------------------------|-------|
| 1   | <b>α-1</b>   | 0.12 ± 0.02      | -10.18              | -9.52               | -10.55              | Yes  | No    | 3.58                         | 5.36  |
| 2   | <b>α-2</b>   | 0.29 ± 0.01      | -9.49               | -11.04              | -11.99              | Yes  | No    | 3.42                         | 4.80  |
| 3   | <b>α-3</b>   | 0.32 ± 0.08      | -9.47               | -9.67               | -11.17              | No   | No    | 2.85                         | 6.22  |
| 4   | <b>α-4</b>   | 0.33 ± 0.06      | -8.62               | -10.63              | -11.06              | No   | No    | 2.92                         | 5.26  |
| 5   | <b>γ-3</b>   | 0.33 ± 0.02      | -8.8                | -10.54              | -10.98              | Yes  | No    | 3.62                         | 6.22  |
| 6   | <b>α-5</b>   | 0.36 ± 0.05      | -9.67               | -9.01               | -9.25               | No   | No    | 2.97                         | 6.59  |
| 7   | <b>α-6</b>   | 0.41 ± 0.15      | -8.29*              | -7.93               | -10.92              | No   | No    | 3.06                         | 5.58  |
| 8   | <b>α-7</b>   | 0.44 ± 0.05      | -9.65               | -8.79               | -11.44              | No   | No    | 2.79                         | 4.45  |
| 9*  | <b>L2</b>    | 0.55 ± 0.05      | -8.47               | -10.62              | -10.23              | Yes  | No    | 2.90                         | 5.12  |
| 10  | <b>α-8</b>   | 0.59 ± 0.08      | -10.55              | -9.7                | -11.23              | No   | No    | 2.79                         | 5.95  |
| 11  | <b>α-9</b>   | 0.72 ± 0.08      | -8.45               | -9.59               | -9.7                | No   | No    | 2.62                         | 5.62  |
| 12  | <b>α-10</b>  | 0.74 ± 0.06      | -9.82               | -8.64               | -10.34              | No   | No    | 2.85                         | 5.95  |
| 13  | <b>α-11</b>  | 0.79 ± 0.18      | -8.96               | -11.44              | -11.34              | No   | No    | 2.96                         | 6.03  |
| 14  | <b>γ-12</b>  | 0.79 ± 0.08      | -8.58               | -8.45               | -10.76              | Yes  | No    | 3.12                         | 6.02  |
| 15* | <b>L1</b>    | 0.81 ± 0.09      | -8.85               | -10.34              | -10.83              | Yes  | No    | 3.24                         | 6.08  |
| 16  | <b>α-12</b>  | 0.87 ± 0.06      | -9.22               | -10.23              | -10.73              | Yes  | No    | 3.12                         | 6.02  |
| 17  | <b>γ-9</b>   | 0.89 ± 0.25      | -9.1                | -9.46               | -10.26              | No   | No    | 2.62                         | 5.62  |
| 18  | <b>α-13</b>  | 1.03 ± 0.11      | -8.51               | -8.73               | -9.52               | Yes  | No    | 2.90                         | 5.97  |
| 19  | <b>α-14</b>  | 1.06 ± 0.08      | -10.04              | -7.77               | -8.12               | Yes  | No    | 3.06                         | 4.39  |
| 20  | <b>γ-6</b>   | 1.26 ± 0.12      | -8.96               | -9.46               | -9.26               | No   | No    | 3.06                         | 5.58  |
| 21  | <b>α-15</b>  | 1.30 ± 0.09      | -8.19               | -8.3                | -7.97               | No   | No    | 3.41                         | 4.97  |
| 22  | <b>α-16</b>  | 1.30 ± 0.28      | -8.06               | -10.12              | -9.44               | No   | No    | 2.87                         | 4.72  |
| 23  | <b>γ-102</b> | 1.39 ± 0.07      | -8.22               | -9.62               | -10.28              | No   | No    | 2.84                         | 5.66  |
| 24  | <b>ε-11</b>  | 1.45 ± 0.26      | -8.50               | -9.75               | -11.67              | Yes  | No    | 3.18                         | 6.03  |
| 25  | <b>α-17</b>  | 1.56 ± 0.19      | -9.53               | -6.56               | -10.2               | No   | No    | 2.98                         | 5.58  |
| 26  | <b>α-18</b>  | 1.59 ± 0.11      | -9.07               | -10.66              | -11.05              | No   | No    | 3.02                         | 5.06  |
| 27  | <b>α-19</b>  | 1.59 ± 0.24      | -8.14               | -11.13              | -10.93              | No   | No    | 3.10                         | 5.27  |
| 28  | <b>ε-201</b> | 1.65 ± 0.22      | -8.45               | -10.44              | -10.03              | Yes  | No    | 3.50                         | 6.98  |
| 29* | <b>L3</b>    | 1.72 ± 0.12      | -8.69               | -8.69               | -9.97               | Yes  | No    | 3.17                         | 6.26  |
| 30  | <b>α-20</b>  | 1.74 ± 0.08      | -8.42               | -8.52               | -9.64               | No   | No    | 2.99                         | 5.26  |
| 31  | <b>α-21</b>  | 1.75 ± 0.07      | -9.19               | -9.12               | -10.88              | No   | No    | 2.76                         | 5.02  |
| 32  | <b>γ-13</b>  | 1.77 ± 0.02      | -8.2                | -7.81               | -10.23              | No   | No    | 2.94                         | 5.59  |
| 33  | <b>γ-103</b> | 1.82 ± 0.66      | -8.69               | -9.12               | -9.7                | No   | No    | 3.25                         | 5.12  |
| 34  | <b>α-22</b>  | 1.83 ± 0.27      | -8.81               | -7.73               | -10.16              | No   | No    | 3.01                         | 6.45  |
| 35  | <b>α-23</b>  | 2.15 ± 0.17      | -8.38               | -8.84               | -10.4               | No   | No    | 3.29                         | 5.61  |
| 36  | <b>γ-104</b> | 2.21 ± 0.43      | -8.37               | -6.84               | -10.35              | Yes  | No    | 3.62                         | 5.36  |
| 37  | <b>γ-20</b>  | 2.46 ± 0.19      | -9.03               | -8.24               | -9.44               | No   | No    | 2.95                         | 5.26  |
| 38  | <b>γ-15</b>  | 2.56 ± 0.17      | -8.07               | -1.64               | -6.93               | No   | No    | 3.85                         | 4.97  |
| 39  | <b>α-24</b>  | 2.64 ± 0.01      | -9.01               | -9.64               | -10.86              | Yes  | No    | 3.46                         | 6.57  |
| 40  | <b>α-25</b>  | 2.81 ± 0.42      | -9.63               | -9.99               | -11.00              | No   | No    | 3.02                         | 5.02  |

|    |                                  |                  |        |        |        |     |    |      |      |
|----|----------------------------------|------------------|--------|--------|--------|-----|----|------|------|
| 41 | <b><math>\gamma</math>-105</b>   | 2.81 $\pm$ 0.57  | -8.91  | -7.82  | -9.95  | No  | No | 2.95 | 4.70 |
| 42 | <b><math>\epsilon</math>-202</b> | 3.03 $\pm$ 0.18  | -8.08  | -10.78 | -9.87  | No  | No | 2.82 | 6.08 |
| 43 | <b><math>\gamma</math>-1</b>     | 3.11 $\pm$ 0.62  | -9.11  | -8.80  | -10.58 | Yes | No | 3.39 | 5.36 |
| 44 | <b><math>\epsilon</math>-203</b> | 3.15 $\pm$ 0.28  | -10.32 | -9.51  | -10.84 | No  | No | 3.56 | 6.55 |
| 45 | <b><math>\gamma</math>-8</b>     | 3.39 $\pm$ 0.34  | -10.38 | -10.13 | -10.81 | No  | No | 2.79 | 5.95 |
| 46 | <b><math>\epsilon</math>-204</b> | 3.40 $\pm$ 0.52  | -9.64  | -9.32  | -10.51 | No  | No | 2.92 | 6.93 |
| 47 | <b><math>\epsilon</math>-5</b>   | 3.40 $\pm$ 0.56  | -10.56 | -9.26  | -11.00 | Yes | No | 3.55 | 6.59 |
| 48 | <b><math>\gamma</math>-17</b>    | 3.69 $\pm$ 0.65  | -9.36  | -3.75  | -9.57  | Yes | No | 2.76 | 5.58 |
| 49 | <b><math>\gamma</math>-106</b>   | 3.94 $\pm$ 0.43  | -9.8   | -9.39  | -10.09 | No  | No | 2.86 | 6.22 |
| 50 | <b><math>\epsilon</math>-23</b>  | 5.08 $\pm$ 0.62  | -9.33  | -9.32  | -10.51 | Yes | No | 3.46 | 6.57 |
| 51 | <b><math>\epsilon</math>-206</b> | 5.11 $\pm$ 0.84  | -9.67  | -9.26  | -11.00 | No  | No | 2.82 | 6.79 |
| 52 | <b><math>\gamma</math>-16</b>    | 6.6 $\pm$ .83    | -8.08  | -8.52  | -9.29  | No  | No | 2.71 | 4.72 |
| 53 | <b><math>\gamma</math>-10</b>    | 7.59 $\pm$ 1.11  | -8.98* | -8.07  | -9.78  | No  | No | 2.85 | 5.95 |
| 54 | <b><math>\gamma</math>-107</b>   | 8.20 $\pm$ 1.54  | -8.34  | -7.86  | -10.53 | No  | No | 3.33 | 6.26 |
| 55 | <b><math>\epsilon</math>-207</b> | 8.38 $\pm$ 0.72  | -8.74  | -9.79  | -9.56  | No  | No | 2.72 | 5.68 |
| 56 | <b><math>\gamma</math>-108</b>   | 10.90 $\pm$ 2.81 | -10.04 | -8.39  | -11.13 | No  | No | 3.89 | 5.46 |
| 57 | <b><math>\alpha</math>-26</b>    | 11.80 $\pm$ 1.64 | -8.67  | -6.06  | -10.28 | No  | No | 2.74 | 5.20 |
| 58 | <b><math>\gamma</math>-109</b>   | 26.61 $\pm$ 1.88 | -8.36  | -7.83  | -9.68  | Yes | No | 2.70 | 5.03 |

\*Docking energy score for (*R,R,R*)-enantiomer. Scores of all other  $\alpha$ -isomers are for (*S,S,S,S*)-enantiomers and those of  $\gamma$ -isomers are for (*1S,2R,3S,4R*)-enantiomers.



**Table S3.** Swiss Target Prediction<sup>#</sup> for potential off-targets of selected FABP inhibitors

| $\alpha$ -1                                        | Known Actives (3D)* | $\alpha$ -2                                                 | Known Actives (3D)* | $\gamma$ -3                                       | Known Actives (3D)* | $\alpha$ -16                                      | Known Actives (3D)* | $\alpha$ -19                                                | Known Actives (3D)* |
|----------------------------------------------------|---------------------|-------------------------------------------------------------|---------------------|---------------------------------------------------|---------------------|---------------------------------------------------|---------------------|-------------------------------------------------------------|---------------------|
| G protein-coupled receptor 44                      | 888                 | G protein-coupled receptor 44                               | 1234                | G protein-coupled receptor 44                     | 1048                | Peroxisome proliferator-activated receptor gamma  | 1031                | Peroxisome proliferator-activated receptor gamma            | 851                 |
| Cholecystokinin B receptor (by homology)           | 497                 | Endothelin receptor ET-A                                    | 654                 | Integrin alpha-4/beta-1                           | 730                 | Integrin alpha-4/beta-1                           | 710                 | Cholecystokinin B receptor                                  | 400                 |
| 5-lipoxygenase activating protein                  | 362                 | Cholecystokinin B receptor                                  | 458                 | Cholecystokinin B receptor (by homology)          | 468                 | Angiotensin-converting enzyme                     | 420                 | Angiotensin-converting enzyme (by homology)                 | 393                 |
| Lysosomal protective protein                       | 331                 | Angiotensin-converting enzyme (by homology)                 | 387                 | Angiotensin-converting enzyme (by homology)       | 376                 | Cholecystokinin B receptor (by homology)          | 418                 | Lysosomal protective protein                                | 358                 |
| Endothelin receptor ET-A                           | 318                 | Thromboxane A2 receptor                                     | 357                 | 5-lipoxygenase activating protein                 | 366                 | Lysosomal protective protein                      | 372                 | Thromboxane A2 receptor                                     | 292                 |
| Caspase-1                                          | 298                 | Lysosomal protective protein                                | 356                 | Lysosomal protective protein                      | 362                 | 5-lipoxygenase activating protein                 | 310                 | Integrin alpha-V/beta-3                                     | 285                 |
| Peroxisome proliferator-activated receptor delta   | 285                 | Thromboxane-A synthase                                      | 311                 | Integrin alpha-V/beta-3                           | 307                 | Integrin alpha-V/beta-3                           | 296                 | Type-1 angiotensin II receptor (by homology)                | 246                 |
| Thromboxane-A synthase                             | 280                 | Prostanoid EP4 receptor                                     | 299                 | Type-1 angiotensin II receptor (by homology)      | 305                 | Type-1 angiotensin II receptor (by homology)      | 284                 | p53-binding protein Mdm-2                                   | 217                 |
| Prostanoid DP receptor                             | 243                 | 5-lipoxygenase activating protein                           | 269                 | Matrix metalloproteinase 3                        | 274                 | Integrin alpha-4/beta-7                           | 254                 | Thromboxane-A synthase                                      | 216                 |
| Angiotensin-converting enzyme                      | 228                 | Caspase-1                                                   | 268                 | Caspase-1                                         | 271                 | Matrix metalloproteinase 3                        | 248                 | Caspase-1                                                   | 213                 |
| Thromboxane A2 receptor                            | 227                 | Type-1 angiotensin II receptor                              | 263                 | Integrin alpha-4/beta-7                           | 254                 | Caspase-1                                         | 246                 | 5-lipoxygenase activating protein                           | 203                 |
| Type-1 angiotensin II receptor (by homology)       | 214                 | Endothelin receptor ET-B                                    | 238                 | Thromboxane A2 receptor                           | 242                 | Thromboxane-A synthase                            | 239                 | Dihydroorotate dehydrogenase                                | 167                 |
| Caspase-3                                          | 210                 | Prostanoid EP2 receptor                                     | 226                 | Thromboxane-A synthase                            | 240                 | p53-binding protein Mdm-2                         | 217                 | Matrix metalloproteinase 3                                  | 160                 |
| Carnitine O-palmitoyltransferase 1, liver isoform  | 169                 | Caspase-3                                                   | 194                 | Dihydroorotate dehydrogenase                      | 218                 | Dihydroorotate dehydrogenase                      | 197                 | Peroxisome proliferator-activated receptor delta            | 151                 |
| Integrin alpha-4                                   | 155                 | Carnitine O-palmitoyltransferase 1, liver isoform           | 185                 | p53-binding protein Mdm-2                         | 199                 | Matrix metalloproteinase 1                        | 180                 | Caspase-3                                                   | 143                 |
| Purinergic receptor P2Y12                          | 147                 | Matrix metalloproteinase 1                                  | 148                 | Prostanoid DP receptor (by homology)              | 193                 | Caspase-3                                         | 156                 | Carnitine O-palmitoyltransferase 1, liver isoform           | 137                 |
| Diacylglycerol O-acyltransferase 1                 | 141                 | Endothelin-converting enzyme 1                              | 145                 | Matrix metalloproteinase 1                        | 192                 | Endothelin-converting enzyme 1                    | 150                 | Endothelin-converting enzyme 1                              | 136                 |
| Phosphodiesterase 4B                               | 132                 | Prostaglandin E synthase                                    | 143                 | Caspase-3                                         | 192                 | Carnitine O-palmitoyltransferase 1, liver isoform | 141                 | Liver glycogen phosphorylase                                | 130                 |
| Carbonic anhydrase II                              | 127                 | Phosphodiesterase 4B                                        | 143                 | Endothelin-converting enzyme 1                    | 161                 | Liver glycogen phosphorylase                      | 132                 | Matrix metalloproteinase 1                                  | 124                 |
| Carnitine O-palmitoyltransferase 1, muscle isoform | 109                 | Liver glycogen phosphorylase                                | 124                 | Liver glycogen phosphorylase                      | 137                 | Chymase                                           | 131                 | Induced myeloid leukemia cell differentiation protein Mcl-1 | 122                 |
| Endothelin-converting enzyme 1                     | 107                 | Integrin alpha-4                                            | 124                 | Integrin alpha-4                                  | 131                 | Arachidonate 5-lipoxygenase                       | 126                 | Chymase                                                     | 118                 |
| Cytosolic phospholipase A2                         | 104                 | Induced myeloid leukemia cell differentiation protein Mcl-1 | 123                 | Carnitine O-palmitoyltransferase 1, liver isoform | 127                 | Prostaglandin E synthase                          | 120                 | Arachidonate 5-lipoxygenase                                 | 116                 |

|                                                                   |     |                                                        |     |                                                                  |     |                                                    |     |                                                        |     |
|-------------------------------------------------------------------|-----|--------------------------------------------------------|-----|------------------------------------------------------------------|-----|----------------------------------------------------|-----|--------------------------------------------------------|-----|
| Thrombin and coagulation factor X                                 | 103 | Chymase                                                | 123 | Glucagon receptor                                                | 125 | Protein farnesyltransferase                        | 106 | Prostaglandin E synthase                               | 108 |
| T-cell protein-tyrosine phosphatase                               | 102 | Carnitine O-palmitoyltransferase 1, muscle isoform     | 123 | Induced myeloid leukemia cell differentiation protein Mcl-1      | 125 | Integrin alpha-4                                   | 105 | Squalene synthetase (by homology)                      | 99  |
| Prostaglandin E synthase                                          | 99  | Phosphodiesterase 4D                                   | 106 | Purinergic receptor P2Y12                                        | 106 | Carnitine O-palmitoyltransferase 1, muscle isoform | 95  | Protein farnesyltransferase                            | 98  |
| Phosphodiesterase 4D                                              | 96  | Glycogen synthase kinase-3 beta                        | 94  | Chymase                                                          | 104 | ADAMTS5                                            | 93  | Carnitine O-palmitoyltransferase 1, muscle isoform     | 96  |
| Endothelin receptor ET-B                                          | 95  | Bile acid receptor FXR                                 | 89  | Transient receptor potential cation channel subfamily M member 8 | 91  | Phosphodiesterase 4B                               | 92  | Integrin alpha-4                                       | 86  |
| Caspase-7                                                         | 83  | Phospholipase A2 group IIA                             | 88  | Cholecystokinin A receptor                                       | 89  | Cholecystokinin A receptor (by homology)           | 87  | ADAMTS5                                                | 82  |
| Casein kinase II alpha                                            | 81  | Cholecystokinin A receptor                             | 88  | ADAMTS5                                                          | 89  | Glucagon receptor                                  | 78  | Protein-tyrosine phosphatase 1B                        | 81  |
| Carbonic anhydrase I                                              | 73  | Cytosolic phospholipase A2                             | 82  | Apoptosis regulator Bcl-X Matrix metalloproteinase 14            | 83  | Phosphodiesterase 4D                               | 73  | Cholecystokinin A receptor                             | 80  |
| Chymase                                                           | 70  | ADAMTS5                                                | 78  | MAP kinase p38 alpha                                             | 77  | Bile acid receptor FXR                             | 71  | Matrix metalloproteinase 14                            | 67  |
| Glycogen synthase kinase-3 beta                                   | 66  | Caspase-7                                              | 72  | MAP kinase p38 alpha                                             | 77  | Matrix metalloproteinase 14                        | 69  | Cytosolic phospholipase A2                             | 61  |
| Apoptosis regulator Bcl-X                                         | 66  | Prostanoid EP3 receptor                                | 72  | Adenosine A1 receptor                                            | 77  | Phospholipase A2 group IIA                         | 68  | Apoptosis regulator Bcl-X                              | 56  |
| FK506-binding protein 1A                                          | 63  | P2X purinoceptor 3                                     | 67  | Caspase-7                                                        | 76  | Apoptosis regulator Bcl-X                          | 64  | MAP kinase p38 alpha                                   | 56  |
| Integrin alpha-5/beta-1                                           | 61  | Carnitine palmitoyltransferase 2                       | 62  | Bile acid receptor FXR                                           | 72  | Angiotensin II receptor                            | 59  | Peptidyl-prolyl cis-trans isomerase NIMA-interacting 1 | 54  |
| Induced myeloid leukemia cell differentiation protein Mcl-1       | 59  | Thrombin and coagulation factor X                      | 60  | Phosphodiesterase 10A                                            | 70  | MAP kinase p38 alpha                               | 56  | Glucagon receptor                                      | 54  |
| Glucagon                                                          | 58  | ADAM17                                                 | 59  | Thrombin and coagulation factor X                                | 70  | P2X purinoceptor 3                                 | 55  | Angiotensin II receptor                                | 53  |
| Protein-tyrosine phosphatase 2C                                   | 55  | Peptidyl-prolyl cis-trans isomerase NIMA-interacting 1 | 58  | Angiotensin II receptor                                          | 65  | Serine/threonine-protein kinase Aurora-A           | 50  | Serine/threonine-protein kinase Aurora-A               | 51  |
| Integrin alpha-V/beta-5                                           | 53  | Angiotensin II receptor                                | 54  | Caspase-8                                                        | 62  | Carnitine palmitoyltransferase 2                   | 50  | Carnitine palmitoyltransferase 2                       | 50  |
| Geranylgeranyl transferase type I                                 | 52  | T-cell protein-tyrosine phosphatase                    | 51  | Methionine aminopeptidase 2                                      | 61  | Caspase-8                                          | 48  | Caspase-7                                              | 49  |
| Hexokinase type IV                                                | 51  | Cyclin-dependent kinase 5/CDK5 activator 1             | 51  | Glycogen synthase kinase-3 beta                                  | 59  | Fatty acid binding protein adipocyte               | 47  | Caspase-8                                              | 48  |
| Phosphodiesterase 10A                                             | 49  | Adenosine A1 receptor                                  | 51  | Peptidyl-prolyl cis-trans isomerase NIMA-interacting 1           | 57  | Integrin alpha-IIb/beta-3                          | 43  | Hydroxycarboxylic acid receptor 2                      | 47  |
| Adenosine A1 receptor                                             | 47  | Leukocyte elastase                                     | 51  | Apoptosis regulator Bcl-2                                        | 52  | Cannabinoid receptor 2                             | 42  | Cannabinoid receptor 2                                 | 43  |
| Tyrosine-protein kinase SYK                                       | 43  | FK506-binding protein 1A                               | 50  | Epidermal growth factor receptor erbB1                           | 49  | Integrin alpha-5/beta-1                            | 40  | Fatty acid binding protein adipocyte                   | 42  |
| Hematopoietic cell protein-tyrosine phosphatase 70Z-PEP           | 41  | Apoptosis regulator Bcl-2                              | 45  | FK506-binding protein 1A                                         | 48  | Angiotensin-converting enzyme 2                    | 40  | Complement factor D                                    | 39  |
| Leukocyte elastase                                                | 41  | Fatty acid binding protein adipocyte                   | 43  | Tyrosine-protein kinase SYK                                      | 46  | Hydroxycarboxylic acid receptor 2                  | 39  | Adenosine A2a receptor (by homology)                   | 37  |
| Intercellular adhesion molecule (ICAM-1), Integrin alpha-L/beta-2 | 37  | Protein-tyrosine phosphatase 2C                        | 43  | Prostanoid IP receptor                                           | 44  | Matrix metalloproteinase 7                         | 37  | Cannabinoid receptor 1                                 | 34  |

|                                                                  |    |                           |    |                                            |    |                                 |    |                                 |    |
|------------------------------------------------------------------|----|---------------------------|----|--------------------------------------------|----|---------------------------------|----|---------------------------------|----|
| Complement factor D                                              | 36 | Complement factor D       | 42 | Cyclin-dependent kinase 5/CDK5 activator 1 | 44 | Complement factor D             | 35 | Angiotensin-converting enzyme 2 | 32 |
| Neurotensin receptor 1                                           | 36 | Purinergic receptor P2Y12 | 39 | Complement factor D                        | 42 | Protein-tyrosine phosphatase 2C | 32 | Integrin alpha-5/beta-1         | 31 |
| Signal transducer and activator of transcription 3 (by homology) | 35 | Thymidylate synthase      | 39 | Hydroxycarboxylic acid receptor 2          | 42 | Cannabinoid receptor 1          | 31 | FK506-binding protein 1A        | 31 |

\* Known active compounds with >0.85 Tanimoto similarity.

# <http://www.swisstargetprediction.ch>

**Table S4.** Swiss Target Prediction for the probability of interactions between selected FABP inhibitors and potential off-targets based on the number of known actives

| TAME                          | Target                                           | Probability* | Known actives (3D) |
|-------------------------------|--------------------------------------------------|--------------|--------------------|
| <b><math>\alpha</math>-1</b>  | G protein-coupled receptor 44                    | 0.122        | 888                |
|                               | Cholecystokinin B receptor (by homology)         | 0.122        | 497                |
|                               | 5-lipoxygenase activating protein                | 0.122        | 362                |
|                               | Lysosomal protective protein                     | 0.122        | 331                |
|                               | Endothelin receptor ET-A                         | 0.122        | 318                |
|                               | Caspase-1                                        | 0.122        | 298                |
|                               | Peroxisome proliferator-activated receptor delta | 0.122        | 285                |
|                               | Thromboxane-A synthase                           | 0.122        | 280                |
|                               | Prostanoid DP receptor                           | 0.122        | 243                |
|                               | Angiotensin-converting enzyme                    | 0.122        | 228                |
| <b><math>\alpha</math>-2</b>  | G protein-coupled receptor 44                    | 0.122        | 1234               |
|                               | Cholecystokinin B receptor                       | 0.122        | 458                |
|                               | Angiotensin-converting enzyme (by homology)      | 0.122        | 387                |
|                               | Thromboxane A2 receptor                          | 0.122        | 357                |
|                               | Lysosomal protective protein                     | 0.122        | 356                |
|                               | Thromboxane-A synthase                           | 0.122        | 311                |
|                               | Prostanoid EP4 receptor                          | 0.122        | 299                |
|                               | 5-lipoxygenase activating protein                | 0.122        | 269                |
|                               | Caspase-1                                        | 0.122        | 268                |
|                               | Type-1 angiotensin II receptor                   | 0.122        | 263                |
| <b><math>\gamma</math>-3</b>  | G protein-coupled receptor 44                    | 0.103        | 1048               |
|                               | Integrin alpha-4/beta-1                          | 0.103        | 730                |
|                               | Cholecystokinin B receptor (by homology)         | 0.103        | 468                |
|                               | Angiotensin-converting enzyme (by homology)      | 0.103        | 376                |
|                               | 5-lipoxygenase activating protein                | 0.103        | 366                |
|                               | Integrin alpha-V/beta-3                          | 0.103        | 307                |
|                               | Type-1 angiotensin II receptor (by homology)     | 0.103        | 305                |
|                               | Matrix metalloproteinase 3                       | 0.103        | 274                |
|                               | Caspase-1                                        | 0.103        | 271                |
|                               | Integrin alpha-4/beta-7                          | 0.103        | 254                |
| <b><math>\alpha</math>-16</b> | Peroxisome proliferator-activated receptor gamma | 0.111        | 1031               |
|                               | Integrin alpha-4/beta-1                          | 0.111        | 710                |
|                               | Angiotensin-converting enzyme                    | 0.111        | 420                |
|                               | Cholecystokinin B receptor (by homology)         | 0.111        | 418                |
|                               | Lysosomal protective protein                     | 0.111        | 372                |
|                               | 5-lipoxygenase activating protein                | 0.111        | 310                |
|                               | Integrin alpha-V/beta-3                          | 0.111        | 296                |
|                               | Type-1 angiotensin II receptor (by homology)     | 0.111        | 284                |
|                               | Integrin alpha-4/beta-7                          | 0.111        | 254                |
|                               | Matrix metalloproteinase 3                       | 0.111        | 248                |
| <b><math>\alpha</math>-19</b> | Peroxisome proliferator-activated receptor gamma | 0.122        | 851                |
|                               | Cholecystokinin B receptor                       | 0.122        | 400                |
|                               | Angiotensin-converting enzyme (by homology)      | 0.122        | 393                |
|                               | Lysosomal protective protein                     | 0.122        | 358                |
|                               | Thromboxane A2 receptor                          | 0.122        | 292                |
|                               | Integrin alpha-V/beta-3                          | 0.122        | 285                |
|                               | Type-1 angiotensin II receptor (by homology)     | 0.122        | 246                |
|                               | p53-binding protein Mdm-2                        | 0.122        | 217                |
|                               | Thromboxane-A synthase                           | 0.122        | 216                |
|                               | Caspase-1                                        | 0.122        | 213                |

\* Probability for this inhibitor to have this protein as a target.

**Scheme S1. Synthesis of hydroxybiphenyls A1~16 through Suzuki coupling**

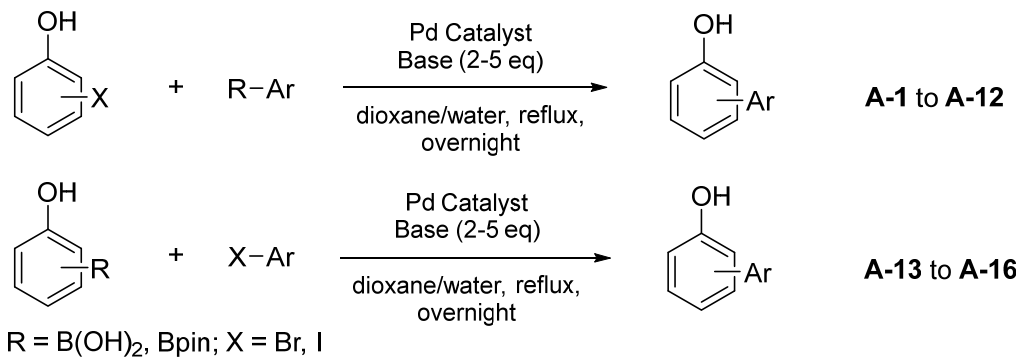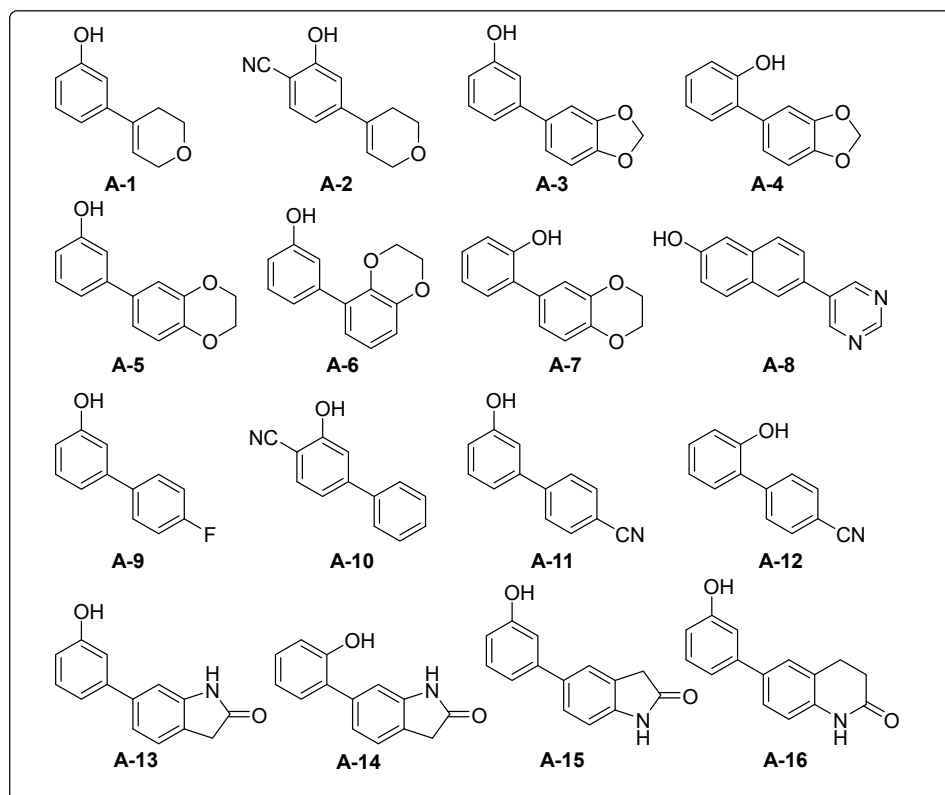

### Scheme S2. Synthesis of A-17 and A-18

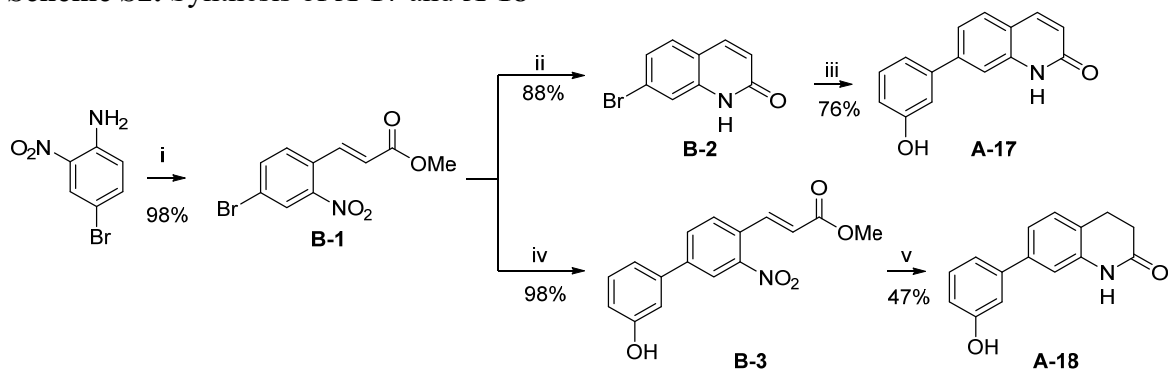

*Reagents and conditions:* i) methyl acrylate, Pd(OAc)<sub>2</sub>, MeSO<sub>3</sub>H, <sup>t</sup>BuONO, MeOH, 0 °C to 25 °C, 65 h, ii) SnCl<sub>2</sub>, Conc. HCl, EtOH, reflux, overnight, iii) 3-hydroxyphenylboronic acid, Pd(PPh<sub>3</sub>)<sub>4</sub>, Na<sub>2</sub>CO<sub>3</sub>, 1,4-dioxane/water, microwave, 125 °C, 20 min, iv) 3-hydroxyphenylboronic acid, Pd(PPh<sub>3</sub>)<sub>4</sub>, Na<sub>2</sub>CO<sub>3</sub>, 1,4-dioxane/water, reflux, 3 h, v) Pd/C, H<sub>2</sub>, 50 °C, 48 h.

### Scheme S3. Synthesis of A-19 and A-20

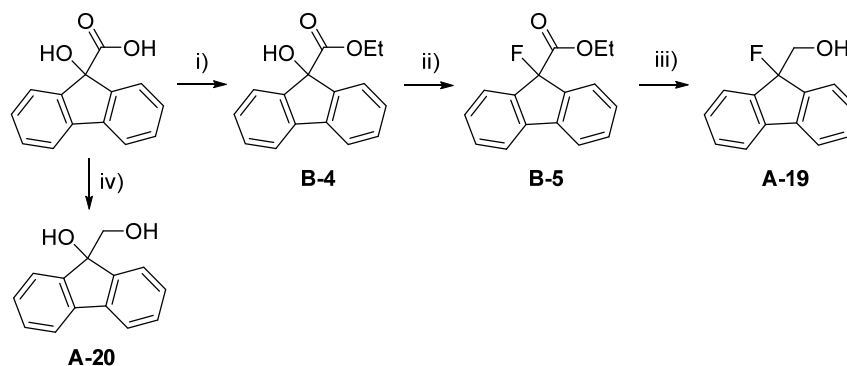

*Reagents and conditions:* i) H<sub>2</sub>SO<sub>4</sub> (cat.), ethanol, reflux, 15 h, ii) diethylaminosulfur trifluoride (DAST), dichloromethane, 0 °C to r.t., 20 h, iii) sodium borohydride, ethanol, 0 °C to r.t., 19 h, iv) borane, THF, 0 °C to r.t., 19 h.

## Synthesis of hydroxybiphenyls (A1~A18), 9-fluorenemethanols (A19, A20) and their characterization data

**3-(3,6-Dihydro-2H-pyran-4-yl)phenol (A-1).** To a round-bottomed flask with a reflux condenser and a magnetic stir bar was added 3-iodophenol (189 mg, 0.86 mmol), 2-(3,6-dihydro-2H-pyran-4-yl)-4,4,5,5-tetramethyl-1,3,2-dioxaborolane (150 mg, 0.71 mmol), and sodium carbonate (226 mg, 2.13 mmol). Then, dioxane/water (3:1, 9 mL) was added followed by N<sub>2</sub> gas purge for 20 min. To the mixture was added tricyclohexylphosphine (20 mg, 0.071 mmol) and Pd<sub>2</sub>(dba)<sub>3</sub> (16.5 mg, 0.018 mmol) under nitrogen and heated under reflux overnight with stirring. The reaction mixture was diluted with ethyl acetate and water (10 mL each), and extracted with ethyl acetate (10 mL x 3). The combined organic layer was washed with brine, dried over anhydrous magnesium sulfate, filtered, and concentrated *in vacuo*. The resulting crude product was purified by flash column chromatography on silica gel, using 33% ethyl acetate in hexane as eluant, to afford the title compound **A-1** (100 mg, 80% yield) as a white solid: m.p. 145-147 °C; <sup>1</sup>H NMR (500 MHz, acetone-d<sub>6</sub>) δ 2.46 (dt, *J* = 6.9, 2.6 Hz, 2H), 3.85 (t, *J* = 5.5 Hz, 2H), 4.24 (dd, *J* = 5.3, 2.6 Hz, 2H), 6.12 - 6.21 (m, 1H), 6.76 (dd, *J* = 8.0, 1.6 Hz, 1H), 6.94 (dd, *J* = 8.9, 5.0 Hz, 2H), 7.17 (t, *J* = 7.9 Hz, 1H), 8.26 (s, 1H); <sup>13</sup>C NMR (126 MHz, acetone-d<sub>6</sub>) δ 26.9, 63.95, 65.32, 111.52, 114.12, 115.87, 122.57, 129.31, 133.86, 141.89, 157.51; HRMS (ESI-TOF) *m/z* calcd. for C<sub>11</sub>H<sub>13</sub>O<sub>2</sub><sup>+</sup> [M+H]<sup>+</sup>: 177.0910. Found 177.0910 (Δ = 0.56 ppm).

In a manner similar to that of **A-1**, **A-8** and **A-15** were synthesized and characterized.

**6-(Pyrimidin-5-yl)naphthalen-2-ol (A-8).** Beige solid; 28% yield; m.p. >230 °C; <sup>1</sup>H NMR (500 MHz, DMSO-d<sub>6</sub>) δ 9.94 (s, 1H), 9.25 (s, 2H), 9.18 (s, 1H), 8.29 (s, 1H), 7.87 (d, 1H, *J* = 8.8 Hz), 7.85 (s, 2H), 7.19 (d, 1H, *J* = 2.2 Hz), 7.17 (dd, 1H, *J* = 8.8, 2.2 Hz); <sup>13</sup>C NMR (500 MHz, DMSO-d<sub>6</sub>) δ 157.3, 156.7, 155.0, 135.0, 133.8, 130.5, 128.3, 128.2, 127.7, 126.5, 125.0, 119.9, 109.0; HRMS (ESI-TOF) *m/z* calcd. for C<sub>14</sub>H<sub>9</sub>NO<sub>2</sub><sup>-</sup> [M-H]<sup>-</sup>: 221.0720. Found 221.0722 (Δ = 0.9 ppm).

**5-(3-Hydroxyphenyl)indolin-2-one (A-15).** Yellow solid; 97% yield; m.p. >230 °C; <sup>1</sup>H NMR (500 MHz, DMSO-d<sub>6</sub>) δ 3.50 (s, 2H), 6.75 (dd, *J* = 8.0, 1.6 Hz, 1H), 6.95 (m, 2H), 7.00 (d, *J* = 7.7 Hz, 1H), 7.14 (dd, *J* = 7.7, 1.6 Hz, 1H), 7.32 - 7.20 (m, 2H), 9.51 (s, 1H), 10.43 (s, 1H); <sup>13</sup>C NMR (125 MHz, DMSO-d<sub>6</sub>) δ 35.6, 107.2, 113.4, 114.4, 117.3, 119.6, 124.7, 125.1, 129.9, 139.9, 141.8, 144.4, 157.8, 176.5; HRMS (ESI-TOF) *m/z* calcd. for C<sub>14</sub>H<sub>12</sub>NO<sub>2</sub><sup>+</sup> [M+H]<sup>+</sup>: 226.0863. Found 226.0858 (Δ = 2.22 ppm).

In a manner similar to that of **A-1**, except for using Pd(PPh<sub>3</sub>)<sub>4</sub> as the catalyst, **A-2**, **A-3**, **A-6**, **A-9**, **A-10**, **A-12**, **A-13**, **A-14**, **A-16**, were synthesized and characterized.

**4-(3,6-Dihydro-2H-pyran-4-yl)-2-hydroxybenzoxonitrile (A-2).** Beige solid; 70% yield: m.p. 154-155 °C; <sup>1</sup>H NMR (700 MHz, acetone-d<sub>6</sub>) δ 2.47 (dd, *J* = 2.5, 1.3 Hz, 2H), 3.83 - 3.89 (m, 2H), 4.23 - 4.30 (m, 2H), 6.35 - 6.40 (m, 1H), 7.10 - 7.16 (m, 2H), 7.56 (dd, *J* = 8.0, 1.3 Hz, 1H), 9.74 (s, 1H); <sup>13</sup>C NMR (176 MHz, acetone-d<sub>6</sub>) δ 26.5, 63.74, 65.27, 98.32, 111.97, 116.33, 116.63, 126.13, 132.74, 133.18, 146.40, 159.78; HRMS (ESI-TOF) *m/z* calcd. for C<sub>12</sub>H<sub>12</sub>NO<sub>2</sub><sup>+</sup> [M+H]<sup>+</sup>: 202.0863. Found 202.0858 (Δ = 2.47 ppm).

**3-(Benzo[*d*][1,3]dioxol-5-yl)phenol (A-3).** Colorless oil; 91% yield; <sup>1</sup>H NMR (500 MHz, acetone-*d*<sub>6</sub>) δ 6.05 (s, 2H), 6.81 (dd, *J* = 7.4, 1.7 Hz, 1H), 6.93 (dd, *J* = 8.4, 3.2 Hz, 1H), 7.06 (d, *J* = 6.8 Hz, 2H), 7.11 (dd, *J* = 3.9, 2.3 Hz, 2H), 7.25 (t, *J* = 7.9 Hz, 1H), 8.38 (s, 1H); <sup>13</sup>C NMR (126 MHz, acetone-*d*<sub>6</sub>) δ 101.28, 107.15, 108.37, 113.54, 113.90, 117.92, 120.31, 129.78, 135.39, 142.25, 147.25, 148.29, 157.78; HRMS (ESI-TOF) *m/z* calcd. for C<sub>13</sub>H<sub>11</sub>O<sub>3</sub><sup>+</sup> [M+H]<sup>+</sup>: 215.0703. Found 215.0706 (Δ = 1.4 ppm).

**3-(2,3-Dihydrobenzo[*b*][1,4]dioxin-5-yl)phenol (A-6).** Colorless oil; >99% yield; <sup>1</sup>H NMR (500 MHz, CDCl<sub>3</sub>) δ 4.30 (s, 8H), 6.86 (d, *J* = 8.3 Hz, 2H), 6.91 (t, *J* = 7.5 Hz, 2H), 6.96 (d, *J* = 8.1 Hz, 2H), 7.05 (dd, *J* = 8.3, 2.0 Hz, 2H), 7.11 (d, *J* = 2.0 Hz, 2H), 7.12 - 7.21 (m, 2H), 7.27 (dd, *J* = 7.6, 1.3 Hz, 2H), 8.20 (s, 1H); <sup>13</sup>C NMR (500 MHz, CDCl<sub>3</sub>) δ 64.2, 64.4, 114.2, 116.5, 116.8, 121.0, 122.0, 122.8, 129.3, 130.4, 139.3, 140.7, 143.9, 155.2; HRMS (ESI-TOF) *m/z* calcd. for C<sub>14</sub>H<sub>13</sub>O<sub>3</sub><sup>+</sup> [M+H]<sup>+</sup>: 229.0859. Found 229.0856 (Δ = -1.3 ppm).

**4'-Fluoro-[1,1'-biphenyl]-3-ol (A-9).** Yellow solid; 47% yield; m.p. 115-117 °C; <sup>1</sup>H NMR (500 MHz, CDCl<sub>3</sub>) δ ppm 6.86 (dd, *J* = 7.93, 2.44 Hz, 1 H) 7.02 - 7.09 (m, 1 H) 7.10 - 7.16 (m, 3 H) 7.26 - 7.34 (m, 1 H) 7.50 - 7.56 (m, 2 H); <sup>13</sup>C NMR (500 MHz, acetone-*d*<sub>6</sub>) δ 123.2, 124.1, 130.6, 140.8, 151.0; FIA-MS (ESI-TOF) *m/z* calcd. for C<sub>12</sub>H<sub>10</sub>FO<sup>+</sup> [M+H]<sup>+</sup>: 189.1. Found 189.0. The analytical data were consistent with literature values except m.p. (lit. 76-77 °C).<sup>1</sup>

**3-Hydroxy-[1,1'-biphenyl]-4-carbonitrile (A-10).** White solid; 92% yield; m.p. 175-177 °C (lit.<sup>1</sup> 180-181 °C); <sup>1</sup>H NMR (500 MHz, DMSO-*d*<sub>6</sub>) δ 7.20 - 7.28 (m, 2 H) 7.39 - 7.45 (m, 1 H) 7.45 - 7.56 (m, 3 H) 7.60 - 7.76 (m, 3 H) 11.23 (s, 1 H); <sup>13</sup>C NMR (500 MHz, DMSO-*d*<sub>6</sub>) δ ppm 98.3, 114.5, 117.5, 118.7, 127.4, 129.2, 134.2, 139.1, 146.9, 161.0; HRMS (ESI-TOF) *m/z* calcd. for C<sub>13</sub>H<sub>10</sub>NO<sup>+</sup> [M+H]<sup>+</sup>: 196.0757. Found 196.0760 (Δ = -1.53 ppm). The analytical data were consistent with literature values.<sup>1</sup>

**4-(2'-Hydroxyphenyl)benzenecarbonitrile (A-12).** White solid; 58% yield; m.p. 119-120 °C (lit.<sup>2</sup> 119-120 °C); <sup>1</sup>H NMR (500 MHz, acetone-*d*<sub>6</sub>) δ 8.67 (s, 1H), 7.86 - 7.77 (m, 4H), 7.37 (d, *J* = 5.9 Hz, 1H), 7.26 (t, *J* = 7.7 Hz, 1H), 7.03 (d, *J* = 9.6 Hz, 1H), 6.98 (t, *J* = 8.1 Hz, 1H); <sup>13</sup>C NMR (176 MHz, acetone-*d*<sub>6</sub>) δ 155.18, 144.60, 132.60, 131.38, 131.03, 130.69, 127.37, 121.16, 119.58, 117.21, 117.09, 110.97; FIA-MS (ESI-TOF) *m/z* calcd. for C<sub>13</sub>H<sub>8</sub>NO<sup>-</sup> [M-H]<sup>-</sup>: 194.1. Found 194.0. The analytical data were consistent with literature values.<sup>2</sup>

**6-(3-Hydroxyphenyl)indolin-2-one (A-13).** Yellow solid; 74% yield; m.p. >230 °C; <sup>1</sup>H NMR (300 MHz, acetone-*d*<sub>6</sub>) δ 3.49 (s, 2H), 6.75 (dd, *J* = 8.0, 1.6, 1H), 6.95 (d, *J* = 4.0, 2H), 7.00 (d, *J* = 7.8, 1H), 7.14 (dd, *J* = 7.7, 1.6, 1H), 7.24 (dd, *J* = 15.0, 7.4, 2H), 8.44 (s, 1H), 9.43 (s, 1H); <sup>13</sup>C NMR (126 MHz, DMSO-*d*<sub>6</sub>) δ 35.6, 107.2, 113.4, 114.4, 117.3, 119.6, 124.7, 125.1, 129.9, 140.0, 141.8, 144.4, 157.8, 176.5; HRMS (ESI-TOF) calcd. for C<sub>14</sub>H<sub>12</sub>NO<sub>2</sub><sup>+</sup> [M+H]<sup>+</sup>: 226.0863. Found 226.0859 (Δ = 1.77 ppm).

**6-(2-Hydroxyphenyl)indolin-2-one (A-14).** Beige solid; 28% yield for three steps; m.p. 192-193 °C; <sup>1</sup>H NMR (700 MHz, acetone-*d*<sub>6</sub>) δ 3.49 (s, 1H), 6.93 (t, *J* = 7.4 Hz, 1H), 6.99 (d, *J* = 8.1 Hz, 1H), 7.16 (d, *J* = 6.1 Hz, 2H), 7.17 - 7.21 (m, 1H), 7.26 - 7.31 (m, 2H), 8.29 (s, 1H), 9.39 (s, 1H); <sup>13</sup>C NMR (176 MHz, acetone-*d*<sub>6</sub>) δ 35.32, 110.36, 116.10, 119.93, 122.44, 124.10, 124.12,



124.30, 128.48, 130.47, 138.42, 143.52, 154.11, 175.99; HRMS (ESI-TOF)  $m/z$  calcd. for  $C_{14}H_{12}NO_2^+$   $[M+H]^+$ : 226.0863. Found = 226.0861 ( $\Delta = 0.88$  ppm).

**6-(3-Hydroxyphenyl)-3,4-dihydroquinolin-2(1H)-one (A-16).** White solid; 33% yield; m.p.  $>230$  °C;  $^1H$  NMR (700 MHz, acetone- $d_6$ )  $\delta$  2.56 (t,  $J = 7.5$  Hz, 2H), 3.04 (t,  $J = 7.5$  Hz, 2H), 6.82 (d,  $J = 8.2$  Hz, 1H), 7.02 (d,  $J = 8.1$  Hz, 1H), 7.11 (d,  $J = 7.7$  Hz, 2H), 7.26 (t,  $J = 7.8$  Hz, 1H), 7.44 (d,  $J = 8.1$  Hz, 1H), 7.47 (s, 1H), 8.38 (s, 1H), 9.15 (s, 1H);  $^{13}C$  NMR (176 MHz, DMSO- $d_6$ )  $\delta$  25.3, 30.88, 113.48, 114.36, 115.86, 117.38, 124.45, 125.72, 126.42, 130.27, 134.52, 138.21, 141.79, 158.30, 170.67; HRMS (ESI-TOF)  $m/z$  calcd. for  $C_{15}H_{14}NO_2^+$   $[M+H]^+$ : 240.1019. Found = 240.1020 ( $\Delta = 0.22$  ppm).

In a manner similar to that of **A-1**, except for using  $Pd(PPh_3)_2Cl_2$  as the catalyst and LiOH as the base, **A-5** was synthesized and characterized.

**3-(2,3-Dihydrobenzo[*b*][1,4]dioxin-6-yl)phenol (A-5).** Colorless oil; 95% yield;  $^1H$  NMR (500 MHz, acetone- $d_6$ )  $\delta$  4.31 (d,  $J = 3.9$  Hz, 4H), 6.83 - 6.77 (m, 1H), 6.90 (dd,  $J = 8.1, 3.6$  Hz, 1H), 7.12 - 7.02 (m, 4H), 7.25 (t,  $J = 7.6$  Hz, 1H), 8.35 (s, 1H);  $^{13}C$  NMR (126 MHz, acetone- $d_6$ )  $\delta$  64.35, 64.37, 113.32, 113.82, 115.32, 117.38, 117.72, 119.60, 129.76, 134.37, 141.98, 143.47, 143.93, 157.79; HRMS (ESI-TOF)  $m/z$  calcd. for  $C_{14}H_{13}O_3^+$   $[M+H]^+$ : 229.0859. Found 229.0853 ( $\Delta = 2.63$  ppm).

In a manner similar to that of **A-1**, except for using  $Pd(PPh_3)_2Cl_2$  as the catalyst and  $K_2CO_3$  as the base, **A-4**, **A-7** and **A-11** were synthesized and characterized.

**2-(Benzo[*d*][1,3]dioxol-5-yl)phenol (A-4).** White solid; 58% yield; m.p. 81-83 °C (lit.<sup>3</sup> 88-90 °C);  $^1H$  NMR (500 MHz, acetone- $d_6$ )  $\delta$  4.17 (dd,  $J = 10.7, 7.3$ , 1H), 4.38 (dd,  $J = 10.7, 7.3$ , 1H), 4.64 (dd,  $J = 10.7, 7$ , 1H), 4.71 (dd,  $J = 10.7, 7.3$ , 1H), 6.69 (dd,  $J = 8.9, 2.1$ , 1H), 6.96 (s, 1H), 7.29 (m, 1H), 7.39 (t,  $J = 7.5, 7.5$ , 2H), 7.5 (m, 5H), 7.62 (d,  $J = 7.3$ , 2H), 7.91 (m, 3H), 8.32 (s, 1H), 9.19 (m, 3H);  $^{13}C$  NMR (500 MHz, acetone- $d_6$ )  $\delta$  41.3, 46.8, 118.4, 126.2, 126.9, 127.3, 127.8, 128.2, 128.6, 129.5, 131.5, 131.6, 154.9, 157.9, 170.6; FIA-MS (ESI-TOF)  $m/z$  calcd. for  $C_{13}H_{11}O_3^+$   $[M+H]^+$ : 215.1. Found 215.0. The analytical data were consistent with literature values.<sup>3</sup>

**2-(2,3-Dihydrobenzo[*b*][1,4]dioxin-6-yl)phenol (A-7).** Beige solid; 70% yield; m.p. 115-117 °C;  $^1H$  NMR (500 MHz, acetone- $d_6$ )  $\delta$  ppm 4.26 (d,  $J = 4.5$  Hz, 2H), 4.29 (d,  $J = 4.6$  Hz, 2H), 6.83 (dd,  $J = 9.1, 6.0$  Hz, 2H), 6.87 (d,  $J = 4.0$  Hz, 2H), 6.99 (d,  $J = 7.6$  Hz, 1H), 7.04 (s, 1H), 7.23 (t,  $J = 7.9$  Hz, 1H), 8.31 (s, 1H);  $^{13}C$  NMR (500 MHz, acetone- $d_6$ )  $\delta$  64.0, 64.17, 113.88, 116.35, 116.42, 120.61, 120.75, 122.30, 128.85, 130.82, 139.29, 140.91, 144.16, 156.95; HRMS (ESI-TOF)  $m/z$  calculated for  $C_{14}H_{13}O_3^+$   $[M+H]^+$ : 229.0859. Found 229.0867, ( $\Delta = -3.22$  ppm).

**3'-Hydroxy-[1,1'-biphenyl]-4-carbonitrile (A-11).** White solid; 81% yield; m.p. 155-156 °C (lit.<sup>4</sup> 148-150 °C);  $^1H$  NMR (500 MHz, acetone- $d_6$ )  $\delta$  6.98 - 6.91 (m, 1H), 7.24 - 7.15 (m, 2H), 7.36 (t,  $J = 7.9$  Hz, 1H), 7.88 - 7.81 (m, 4H), 8.60 (s, 1H);  $^{13}C$  NMR (126 MHz, acetone- $d_6$ )  $\delta$  110.87, 113.96, 115.66, 118.38, 118.49, 127.70, 130.25, 132.61, 140.51, 145.42, 158.06; HRMS (ESI-TOF)  $m/z$  calculated for  $C_{13}H_8NO^-$   $[M-H]^-$ : 194.0611. Found 194.0611, ( $\Delta = 0$  ppm). The analytical data were consistent with literature values<sup>4</sup>.

**Methyl (*E*)-3-(4-bromo-2-nitrophenyl)acrylate (B-1).** This compound was prepared by the literature method<sup>6</sup>. Yellow solid; 98% yield; m.p. 84-85 °C (lit.<sup>6</sup> 84-85 °C); <sup>1</sup>H NMR (500 MHz, CDCl<sub>3</sub>) δ 8.22 (s, 1H), 8.06 (d, *J* = 15.8 Hz, 1H), 7.80 (d, *J* = 8.3 Hz, 1H), 7.54 (d, *J* = 8.3 Hz, 1H), 6.39 (d, *J* = 15.8 Hz, 1H), 3.86 (s, 3H); <sup>13</sup>C NMR (126 MHz, CDCl<sub>3</sub>) δ 165.98, 148.55, 138.99, 136.62, 130.29, 129.40, 128.01, 123.80, 123.43, 52.15; FIA-MS (ESI-TOF) *m/z* calcd. for C<sub>10</sub>H<sub>9</sub>BrNO<sub>4</sub><sup>+</sup> [M+H]<sup>+</sup>: 286.0. Found 285.9. The analytical data were consistent with literature values.<sup>6</sup>

**7-Bromoquinolin-2(1*H*)-one (B-2).** To a round-bottomed flask with a reflux condenser and a magnetic stir bar was added tin (II) chloride (1.82 mg, 8.10 mmol), ethanol (5 mL), and concentrated HCl (1 mL). The mixture was stirred and heated to 70 °C until it became a clear solution. To this refluxing solution was added methyl (*E*)-3-(4-bromo-2-nitrophenyl)acrylate (575 mg, 2.04 mmol) (B-1). The mixture was heated under reflux overnight with stirring. To the reaction mixture was added water (5 mL) and allowed to cool down to 5 °C. The mixture was stirred at 5 °C for 30 min. The precipitate was collected via vacuum filtration, washed with water (5 mL), and dried *in vacuo* to afford the title compound B-2 (380 mg, 88% yield) as a white solid: m.p. >230 °C; <sup>1</sup>H NMR (500 MHz, DMSO-*d*<sub>6</sub>) δ 11.81 (s, 1H), 7.90 (d, *J* = 9.6 Hz, 1H), 7.62 (d, *J* = 8.4 Hz, 1H), 7.48 (d, *J* = 1.6 Hz, 1H), 7.34 (dd, *J* = 8.4, 1.8 Hz, 1H), 6.53 (d, *J* = 9.6 Hz, 1H); <sup>13</sup>C NMR (126 MHz, DMSO-*d*<sub>6</sub>) δ 162.15, 140.43, 140.25, 130.27, 125.12, 123.88, 122.88, 118.65, 117.82; FIA-MS (ESI-TOF) *m/z* calcd. for C<sub>9</sub>H<sub>7</sub>BrNO<sup>+</sup> [M+H]<sup>+</sup>: 224.0. Found 224.0. The analytical data were consistent with literature values.<sup>7</sup>

**7-(3-Hydroxyphenyl)quinolin-2(1*H*)-one (A-17).** To a microwave vial with a magnetic stir bar was added 3-hydroxyphenylboronic acid (220 mg, 1.57 mmol), 7-bromoquinolin-2(1*H*)-one (B-2) (200 mg, 0.90 mmol), potassium carbonate (190 mg, 1.8 mmol), and Pd(PPh<sub>3</sub>)<sub>4</sub> (100 mg, 0.09 mmol). Then, dioxane/water (3:1, 9 mL) was added to the mixture, followed by N<sub>2</sub> gas purge for 20 min. The mixture was reacted in a microwave reactor (125 °C, 300 W) for 20 min. To the reaction mixture was added water (20 mL) and allowed to cool down to 5 °C. The precipitate was collected via vacuum filtration, washed with cold dichloromethane (25 mL), and dried *in vacuo* to afford the title compound A-17 (160 mg, 76% yield) as a white solid: m.p. >220 °C; <sup>1</sup>H NMR (300 MHz, DMSO-*d*<sub>6</sub>) δ 6.49 (d, *J* = 9.8 Hz, 1H), 6.82 (dd, *J* = 8.0, 1.5 Hz, 1H), 7.15 - 6.97 (m, 2H), 7.30 (t, *J* = 7.9 Hz, 1H), 7.41 (dd, *J* = 8.2, 1.6 Hz, 1H), 7.49 (s, 1H), 7.72 (d, *J* = 8.2 Hz, 1H), 7.93 (d, *J* = 9.5 Hz, 1H), 9.64 (s, 1H), 11.79 (s, 1H); <sup>13</sup>C NMR (126 MHz, DMSO-*d*<sub>6</sub>) δ 113.17, 114.06, 115.64, 118.10, 118.89, 121.03, 122.26, 128.89, 130.63, 139.80, 140.36, 141.26, 142.70, 158.38, 162.53; HRMS (ESI-TOF) *m/z* calc. for C<sub>15</sub>H<sub>12</sub>NO<sub>2</sub><sup>+</sup> [M+H]<sup>+</sup>: 238.0863. Found 238.0861 (Δ = 0.84 ppm).

**Methyl (*E*)-3-(3'-hydroxy-3-nitro-[1,1'-biphenyl]-4-yl)acrylate (B-3).** To a round-bottomed flask with a reflux condenser and magnetic stir bar was added methyl (*E*)-3-(4-bromo-2-nitrophenyl)acrylate (410 mg, 1.43 mmol), 3-hydroxyphenyl boronic acid (290 mg, 2.14 mmol), and sodium carbonate (450 mg, 4.28 mmol). Then, dioxane/water (4:1, 20 mL) was added to the mixture, followed by N<sub>2</sub> gas purge for 20 min. To the mixture was added tetrakis(triphenylphosphine)palladium(0) (160 mg, 0.14 mmol) under nitrogen and heated under reflux for 3 h with stirring. The reaction mixture was diluted with ethyl acetate and water (20 mL each), and extracted with ethyl acetate (20 mL x 2). The combined organic layer was washed with

brine, dried over anhydrous magnesium sulfate, filtered, and concentrated *in vacuo*. The resulting crude product was purified by flash column chromatography on silica gel, using 25% ethyl acetate in hexane as eluant, to afford the title compound **B-3** (420 mg, 98% yield) as a yellow solid: m.p. 137-140 °C; <sup>1</sup>H NMR (500 MHz, acetone-d<sub>6</sub>): δ 3.83 (s, 3H), 6.33 - 6.41 (m, 1H), 6.64 (d, *J* = 15.8 Hz, 1H), 6.97 - 7.03 (m, 1H), 7.26 - 7.31 (m, 2H), 7.39 (t, *J* = 7.9 Hz, 1H), 8.01 - 8.12 (m, 3H), 8.30 (s, 1H); <sup>13</sup>C NMR (125 MHz, acetone-d<sub>6</sub>): δ 51.5, 106.96, 114.12, 116.30, 118.54, 122.64, 122.89, 128.52, 129.93, 130.73, 131.72, 139.33, 143.74, 149.70, 158.49, 166.25; HRMS (ESI-TOF) *m/z* calculated for C<sub>16</sub>H<sub>13</sub>NNaO<sub>5</sub><sup>+</sup> [M+Na]<sup>+</sup>: 322.0686. Found = 322.0691 (Δ = 1.56 ppm).

**7-(3-Hydroxyphenyl)-3,4-dihydroquinolin-2(1H)-one (A-18)**. To a round-bottomed flask with a magnetic stir bar was added methyl (*E*)-3-(3'-hydroxy-3-nitro-[1,1'-biphenyl]-4-yl)acrylate (**B-3**) (420 mg, 1.40 mmol), 10% Pd/C (70 mg, 0.66 mmol), and methanol (14 mL). The atmosphere of the reaction flask was exchanged with H<sub>2</sub> for 3 times and the reaction was heated to 40 °C for 24 h with stirring. The reaction mixture was filtered through celite and concentrated *in vacuo*. The crude product, thus obtained, was purified by flash column chromatography on silica gel, using gradient of ethyl acetate in hexanes from 50% to 80%, to afford the title compound **A-18** (160 mg, 47% yield) as a white solid: m.p. 230 °C (decomp.); <sup>1</sup>H NMR (500 MHz, acetone-d<sub>6</sub>): δ 2.53 (d, *J* = 7.5 Hz, 2H), 2.98 (t, *J* = 7.5 Hz, 2H), 6.83 (d, *J* = 8.0 Hz, 1H), 7.03 - 7.10 (m, 2H), 7.18 (d, *J* = 6.8 Hz, 2H), 7.21 - 7.30 (m, 2H), 8.41 (s, 1H), 9.07 (s, 1H); <sup>13</sup>C NMR (500 MHz, DMSO-d<sub>6</sub>): δ 24.9, 30.9, 113.5, 113.7, 114.9, 117.7, 120.7, 123.3, 128.7, 130.4, 139.2, 139.9, 141.9, 158.2, 170.7; HRMS (ESI-TOF) *m/z* calcd. for C<sub>15</sub>H<sub>14</sub>NO<sub>2</sub> [M+H]<sup>+</sup>: 240.1019. Found 240.1020 (Δ = 0.42 ppm).

**Ethyl 9-hydroxy-9H-fluorene-9-carboxylate (B-4)**. This compound was prepared by the literature method.<sup>8</sup> White solid; 91% yield; m.p. 92-93 °C (lit.<sup>8</sup> 90 °C); <sup>1</sup>H NMR (500 MHz, CDCl<sub>3</sub>): δ 7.67 (d, *J* = 7.6 Hz, 2H), 7.44 (d, *J* = 7.3 Hz, 2H), 7.41 (d, *J* = 7.5 Hz, 2H), 7.30 (t, *J* = 7.5 Hz, 2H), 4.29 (s, 1H), 4.11 (q, *J* = 7.1 Hz, 2H), 1.02 (t, *J* = 7.1 Hz, 3H); <sup>13</sup>C NMR (125 MHz, CDCl<sub>3</sub>): δ 174.5, 145.1, 141.0, 129.7, 128.2, 123.5, 120.4, 82.4, 62.7, 13.8; HRMS (ESI-TOF) *m/z* calculated for C<sub>16</sub>H<sub>18</sub>NO<sub>3</sub><sup>+</sup> [M+NH<sub>4</sub>]<sup>+</sup>: 272.1292. Found = 272.1281. (Δ = -4.0 ppm). The analytical data were consistent with literature values<sup>8</sup>.

**Ethyl 9-fluoro-9H-fluorene-9-carboxylate (B-5)**. To a solution of ethyl 9-hydroxy-9H-fluorene-9-carboxylate (**B-4**) (0.37 g, 1.46 mmol) in DCM (8 mL) was added diethylaminosulfur trifluoride (0.23 mL, 1.76 mmol) at 0 °C. The reaction mixture was gradually warmed to room temperature and stirred for 50 h. The reaction mixture was diluted with dichloromethane and water (20 mL each). The combined organic layer was washed with brine, dried over anhydrous magnesium sulfate, filtered, and concentrated *in vacuo*. The resulting crude product was purified by flash column chromatography on silica gel, using 20% ethyl acetate in hexane as eluant, to afford the title compound (0.35 g, 93% yield) as a white solid: m.p. 71-72 °C; <sup>1</sup>H NMR (500 MHz, CDCl<sub>3</sub>): δ 1.16 (t, *J* = 7.1 Hz, 3H), 4.22 (q, *J* = 7.1 Hz, 2H), 7.32 (t, *J* = 7.5 Hz, 2H), 7.46 (t, *J* = 7.5 Hz, 2H), 7.56 (d, *J* = 7.4 Hz, 2H), 7.64 (d, *J* = 7.6 Hz, 2H); <sup>13</sup>C NMR (125 MHz, CDCl<sub>3</sub>): δ 13.9, 62.16, 97.66 (d, <sup>1</sup>*J*<sub>C,F</sub> = 192.6 Hz), 120.56, 124.72, 128.45 (d, <sup>3</sup>*J*<sub>C,F</sub> = 1.7 Hz), 130.99, 140.85 (d, <sup>2</sup>*J*<sub>C,F</sub> = 19.0 Hz), 141.33 (d, <sup>3</sup>*J*<sub>C,F</sub> = 2.6 Hz), 169.09 (d, <sup>2</sup>*J*<sub>C,F</sub> = 33.4 Hz); <sup>19</sup>F NMR (376 MHz, CDCl<sub>3</sub>): δ -161.2; HRMS (ESI-TOF) *m/z* calcd. for C<sub>16</sub>H<sub>17</sub>FNO<sub>2</sub><sup>+</sup> [M+NH<sub>4</sub>]<sup>+</sup>: 274.1238. Found = 274.1238. (Δ = 0.0 ppm).

**(9-Fluoro-9H-fluoren-9-yl)methanol (A-19).** To a solution of ethyl 9-fluoro-9H-fluorene-9-carboxylate (**B-5**) (0.4 g, 1.57 mmol) in ethanol (16 mL) was added sodium borohydride (0.12 g, 3.14 mmol) at 0 °C. The reaction mixture was gradually warmed to room temperature and stirred for 19 h. The ethanol was removed *in vacuo*. The resulting crude product was purified by flash column chromatography on silica gel, using 20% ethyl acetate in hexane as eluant, to afford the title compound **A-19** (0.29 g, 86% yield) as a colorless oil: <sup>1</sup>H NMR (500 MHz, CDCl<sub>3</sub>): δ 4.08 (d, <sup>1</sup>J<sub>H,F</sub> = 19.3 Hz, 2H), 7.35 (t, *J* = 7.5 Hz, 2H), 7.47 (t, *J* = 7.5 Hz, 2H), 7.68 (t, *J* = 7.7 Hz, 4H); <sup>13</sup>C NMR (125 MHz, CDCl<sub>3</sub>): δ 66.94 (d, <sup>2</sup>J<sub>C,F</sub> = 30.6 Hz), 100.25 (d, <sup>1</sup>J<sub>C,F</sub> = 181.6 Hz), 120.31, 125.14, 128.13 (d, <sup>3</sup>J<sub>C,F</sub> = 1.7 Hz), 130.55, 140.46 (d, <sup>3</sup>J<sub>C,F</sub> = 3.0 Hz), 141.64 (d, <sup>2</sup>J<sub>C,F</sub> = 18.7 Hz); <sup>19</sup>F NMR (376 MHz, CDCl<sub>3</sub>): δ -169.69; HRMS (ESI-TOF) *m/z* calculated for C<sub>14</sub>H<sub>11</sub>O<sup>+</sup> [M-F]<sup>+</sup>: 195.0810. Found = 195.0818. (Δ = 4.1 ppm).

**(9-Hydroxy-9H-fluoren-9-yl)methanol (A-20).** To a round-bottomed flask with a reflux condenser and a magnetic stir bar was added 9-hydroxy-9H-fluorene-9-carboxylic acid (1.0 g, 4.44 mmol) and THF (44 mL). To the mixture borane dimethyl sulfide (7.4 mL, 14.8 mmol, 2M in THF) was added at 0 °C. The mixture was heated under reflux overnight with stirring. The solvent was removed *in vacuo*. The resulting crude product was purified by flash column chromatography on silica gel, using gradient methanol in dichloromethane from 2% to 10%, to afford the title compound **A-20** (898 mg, 95% yield) as a white solid: m.p. 96-97 °C; (lit. 94-96 °C) <sup>1</sup>H NMR (500 MHz, CDCl<sub>3</sub>) δ 7.64 (d, *J* = 7.5 Hz, 2H), 7.59 (d, *J* = 7.4 Hz, 2H), 7.39 (t, *J* = 7.5 Hz, 2H), 7.30 (t, *J* = 7.4 Hz, 2H), 3.81 (s, 2H), 2.71 (brs, 1H), 2.47 (brs, 1H); FIA-MS (ESI-TOF) *m/z* calcd. for C<sub>14</sub>H<sub>11</sub>O<sub>2</sub><sup>-</sup> [M-H]<sup>-</sup>: 211.1. Found 211.0. The analytical data were consistent with literature values.<sup>9</sup>

## References

1. Zhang, W.; Yang, W.; Zhao, W., Lewis acid-promoted site-selective cyanation of phenols. *Org Biomol Chem* **2020**, *18*, 4604-4609.
2. Inamoto, K.; Kadokawa, J.; Kondo, Y., Ruthenium-Catalyzed Carbonylative C-H Cyclization of 2-Arylphenols A Novel Synthetic Route to 6H-Dibenzo[b,d]pyran-6-ones. *Org Lett* **2013**, *15* (15), 3962-3965.
3. Lee, T.-H.; Jayakumar, J.; Cheng, C.-H.; Chuang, S.-C., One pot synthesis of bioactive benzopyranones through palladium- catalyzed C-H activation and CO insertion into 2-arylphenols. *Chem Commun* **2013**, *49*, 11797-11799.
4. Moorthy, J. N.; Koner, A. L.; Samanta, S.; Roy, A.; Nau, W. M., Modulation of spectrokinetic properties of o-quinonoid reactive intermediates by electronic factors: time-resolved laser flash and steady-state photolysis investigations of photochromic 6- and 7-arylchromenes. *Chemistry* **2009**, *15* (17), 4289-300.
5. Hong, P. C.; Chen, L. J.; Lai, T. Y.; Yang, H. Y.; Chiang, S. J.; Lu, Y. Y.; Tsai, P. K.; Hsu, H. Y.; Wei, W. Y.; Liao, C. B., Synthesis of selenophene derivatives as novel CHK1 inhibitors. *Bioorg Med Chem Lett* **2010**, *20* (17), 5065-8.
6. Callonnec, F. L.; Fouquet, E.; Felpin, F. X., Unprecedented Substoichiometric Use of Hazardous Aryl Diazonium Salts in the Heck-Matsuda Reaction via a Double Catalytic Cycle. *Org Lett* **2011**, *13* (10), 2646-2649.
7. Alabaster, C. T.; Bell, A. S.; Campbell, S. F.; Ellis, P.; Henderson, C. G.; Roberts, D. A.; Ruddock, K. S.; Samuels, G. M. R.; Stefaniak, M. H., 2(1H)-Quinolinones with cardiac stimulant activity. 1. Synthesis and biological activities of (six-membered heteroaryl)-substituted derivatives. *J. Med. Chem.* **1988**, *31* (10), 2048-2056.
8. Galvez, E.; Trigo, G. G.; Martinez, M.; Cabezas, N., Synthesis and structural study of cyclopentane, indene and fluorene spiro-derivatives. *J. Heterocycl. Chem.* **1983**, *20* (1), 13-16.
9. Mladenove, G.; Singh, G.; Acton, A.; Chen, L.; Rinco, O.; Johnston, L. J.; Lee-Ruff, E., Photochemical Pinacol Rearrangements of Unsymmetrical Diols. *J Org Chem* **2004**, *69* (6), 2017-2023.

# <sup>1</sup>H NMR of α-TAMSE-1

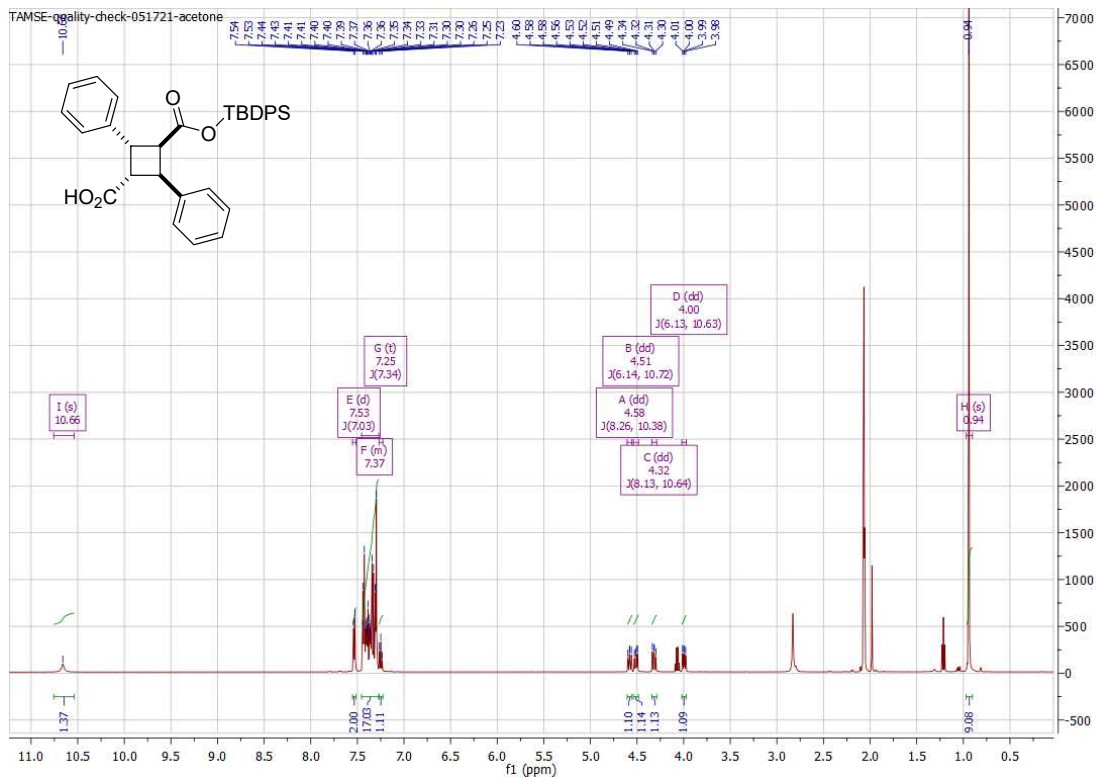

# <sup>13</sup>C NMR of α-TAMSE-1

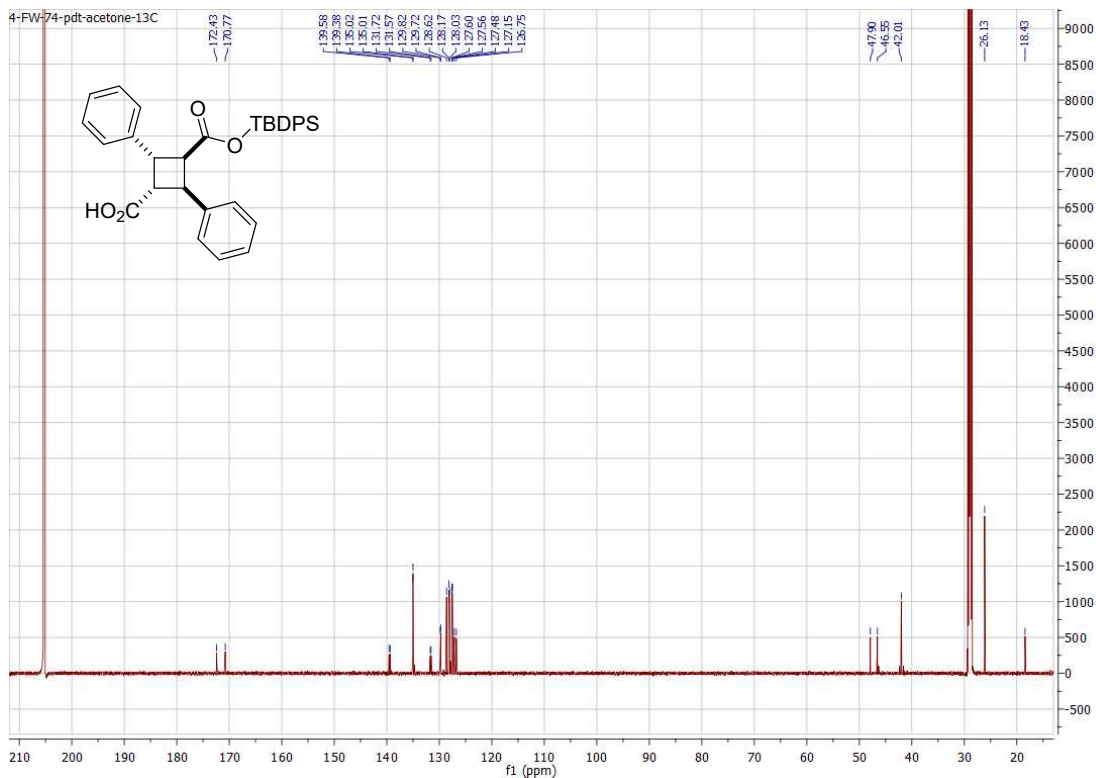

# $^1\text{H}$ NMR of $\alpha$ -TADSE-1

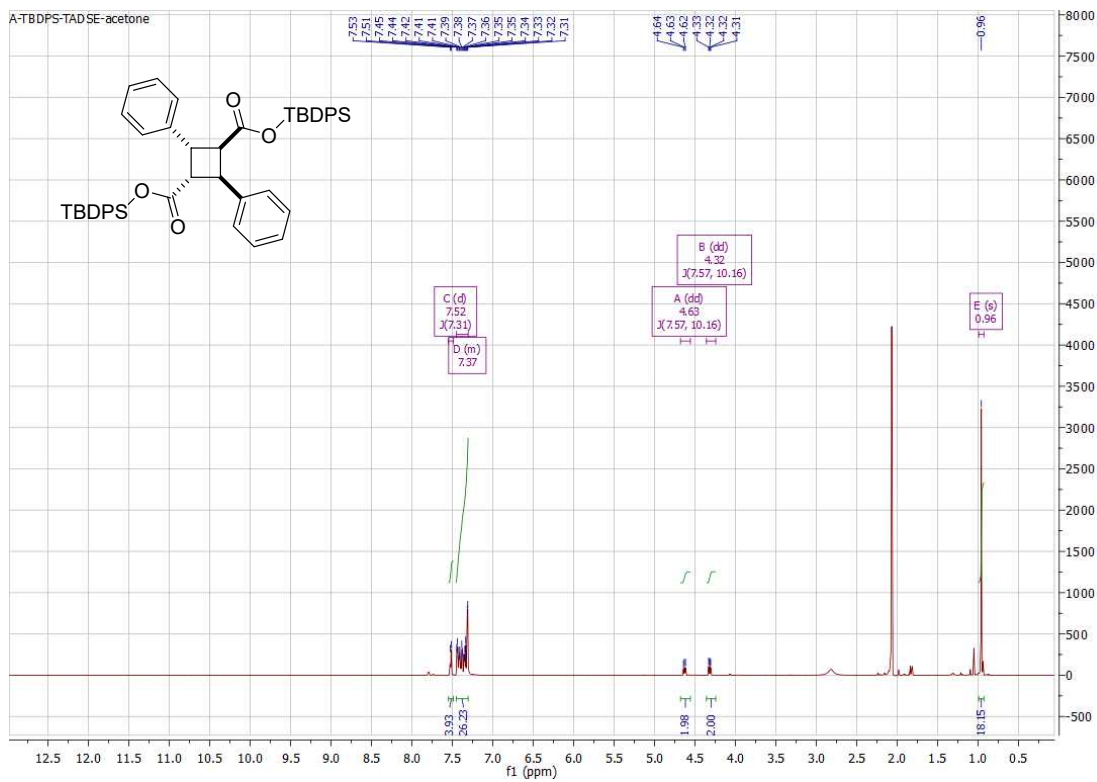

# $^{13}\text{C}$ NMR of $\alpha$ -TADSE-1

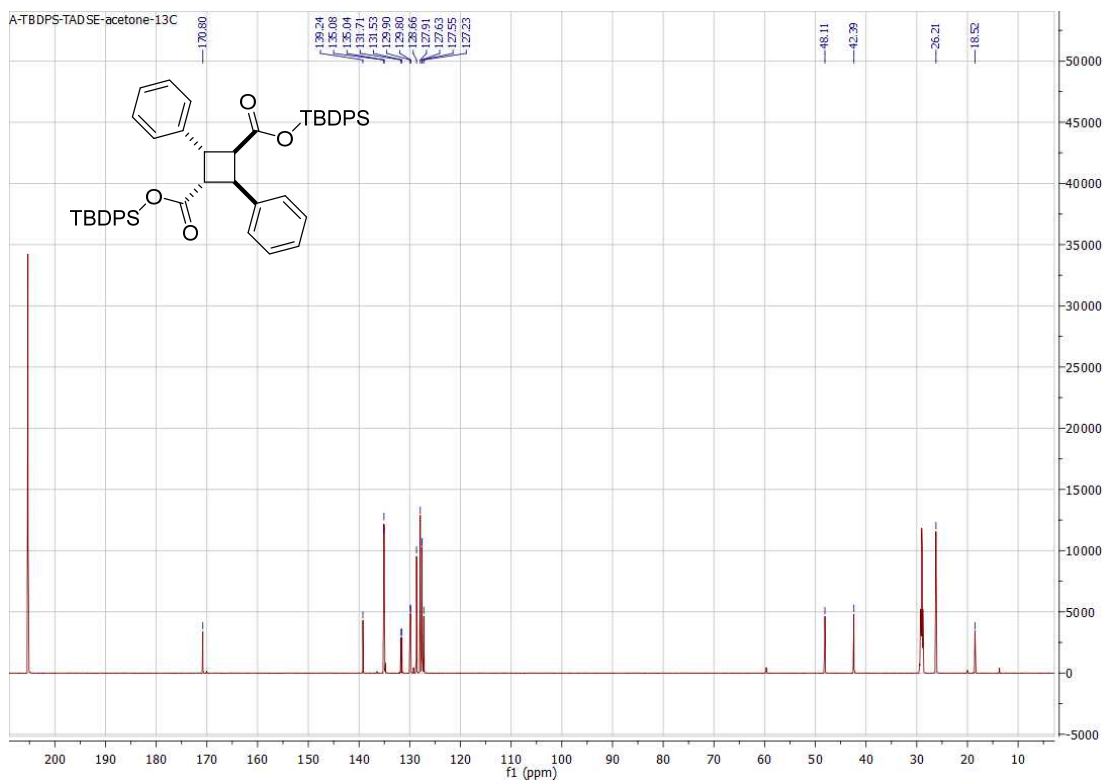

# <sup>1</sup>H NMR of $\alpha$ -2-MeO-TAMSE-1

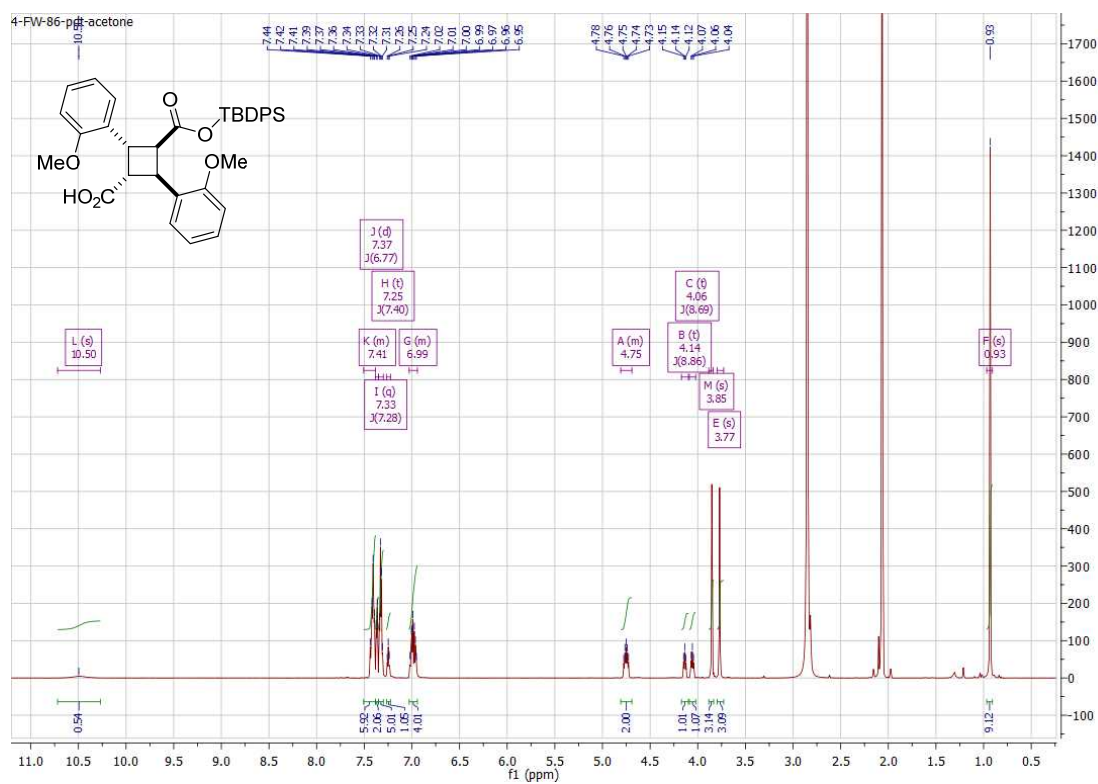

# <sup>13</sup>C NMR of $\alpha$ -2-MeO-TAMSE-1

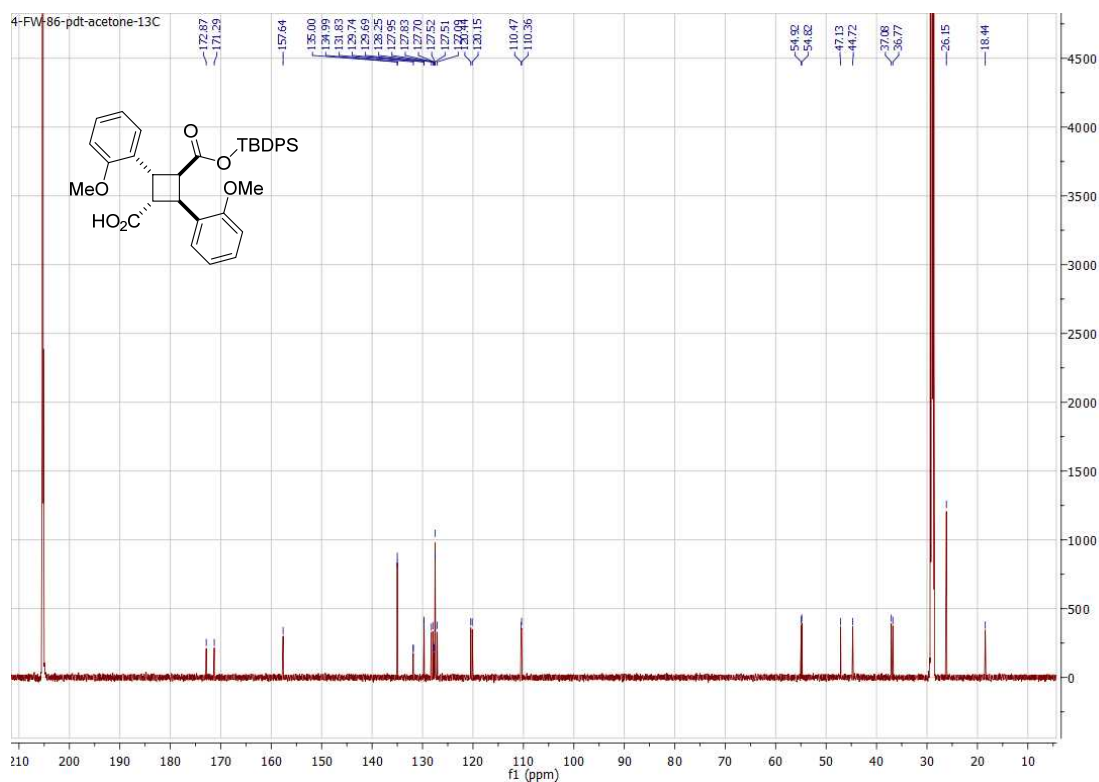



# <sup>1</sup>H NMR of α-2-MeO-TADSE-1

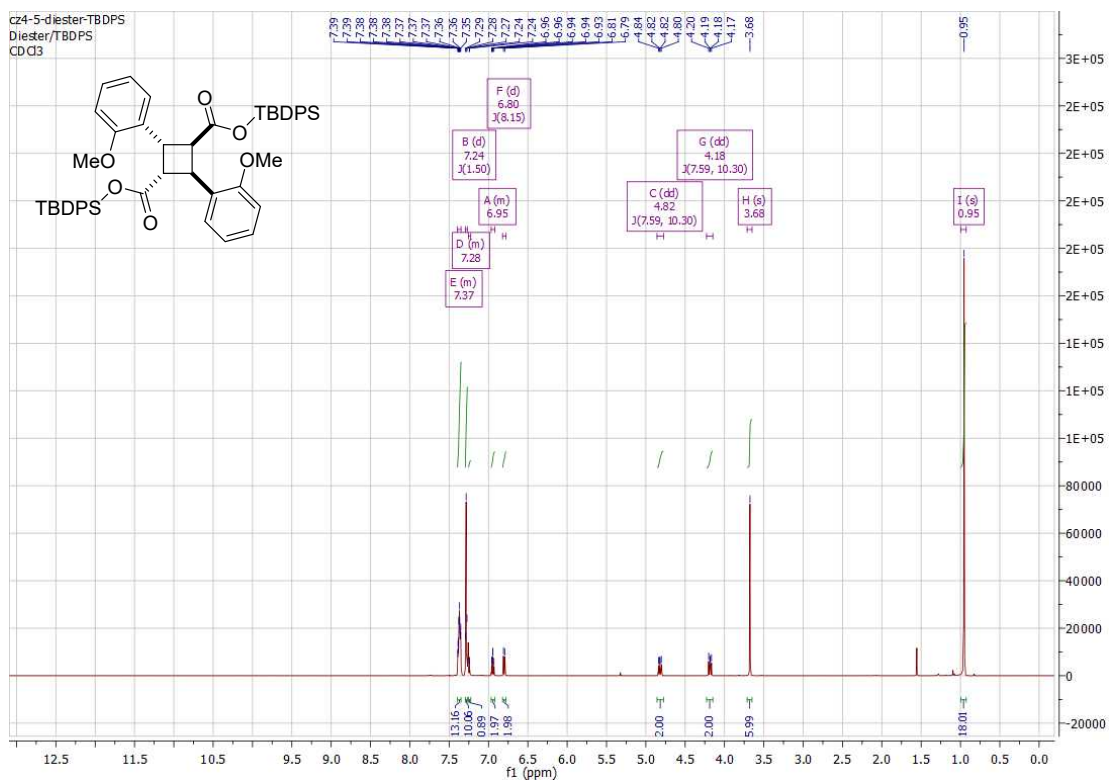

# <sup>13</sup>C NMR of α-2-MeO-TADSE-1

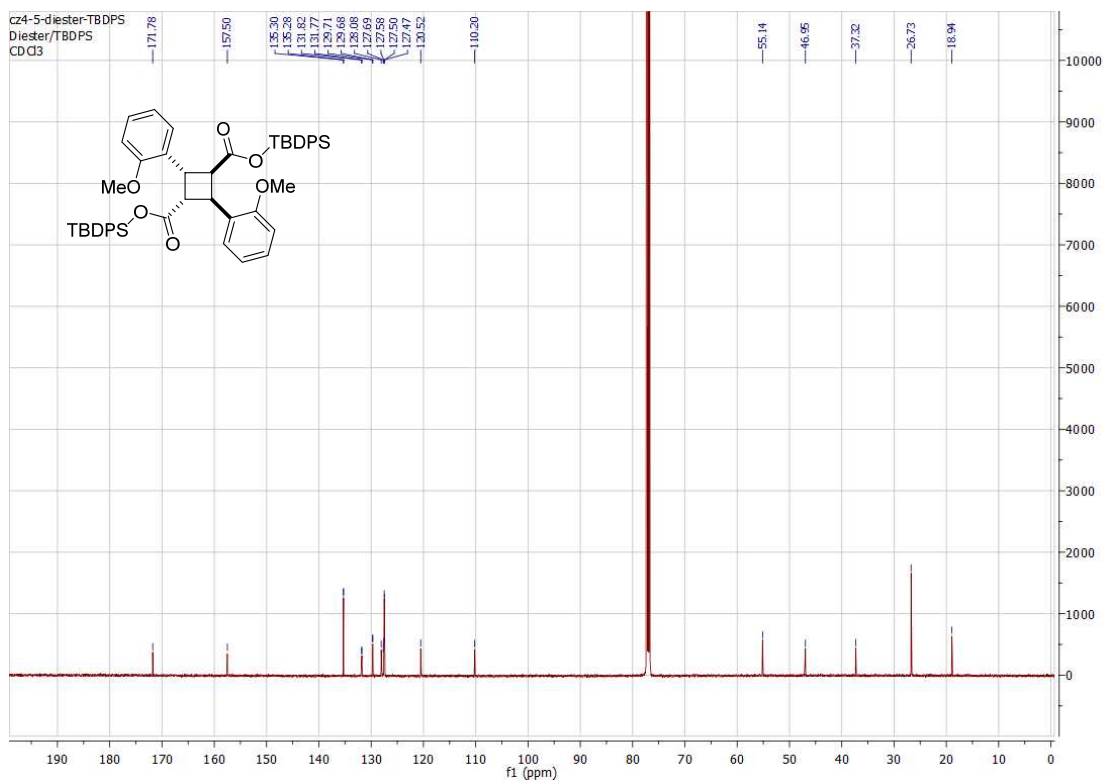

# $^1\text{H}$ NMR of $\alpha$ -TAMSE-2

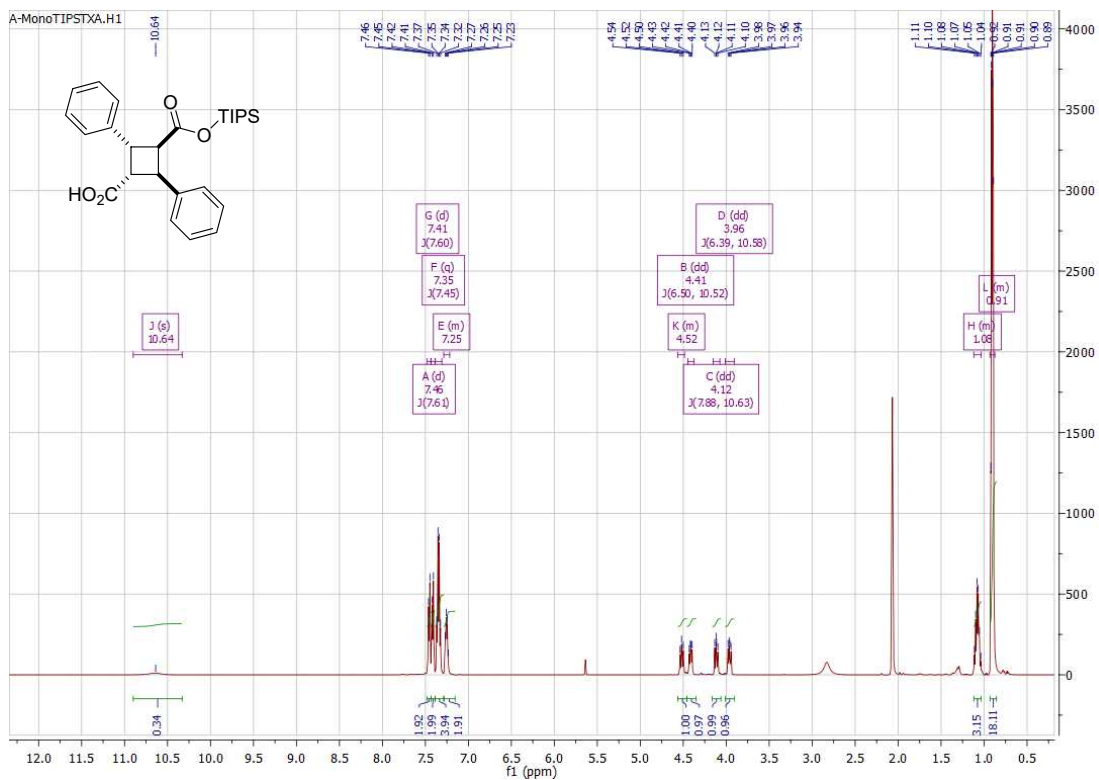

# $^{13}\text{C}$ NMR of $\alpha$ -TAMSE-2

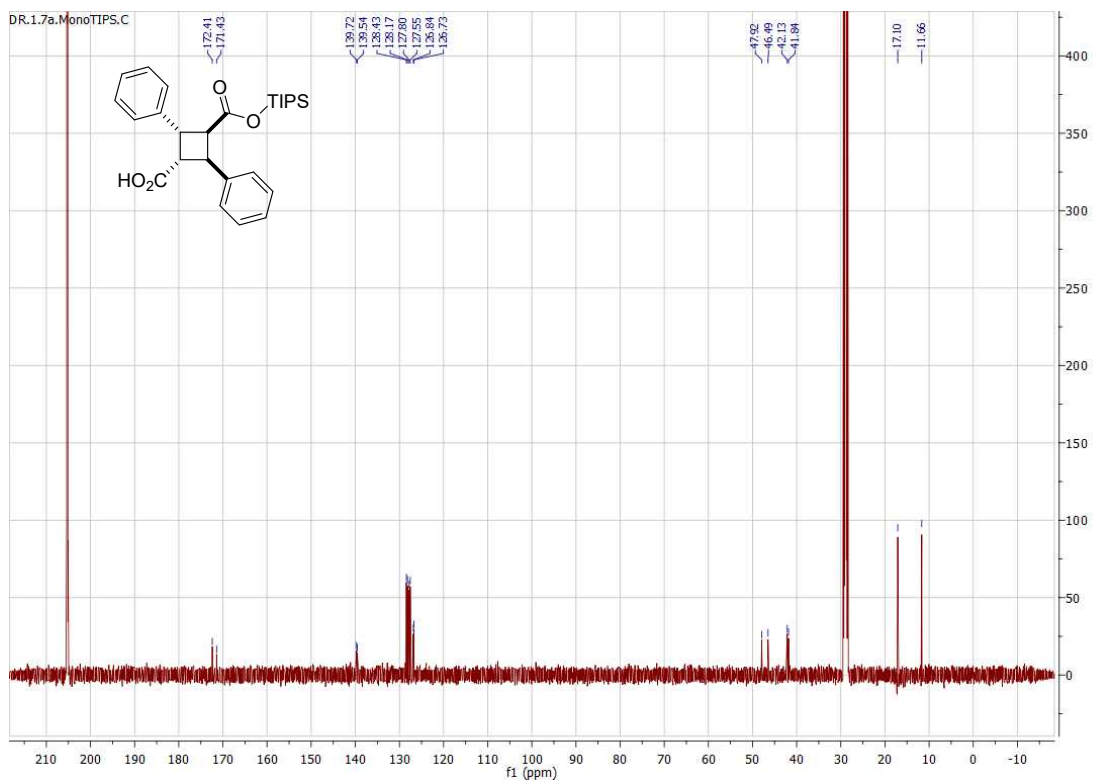

# $^1\text{H}$ NMR of $\alpha$ -TADSE-2

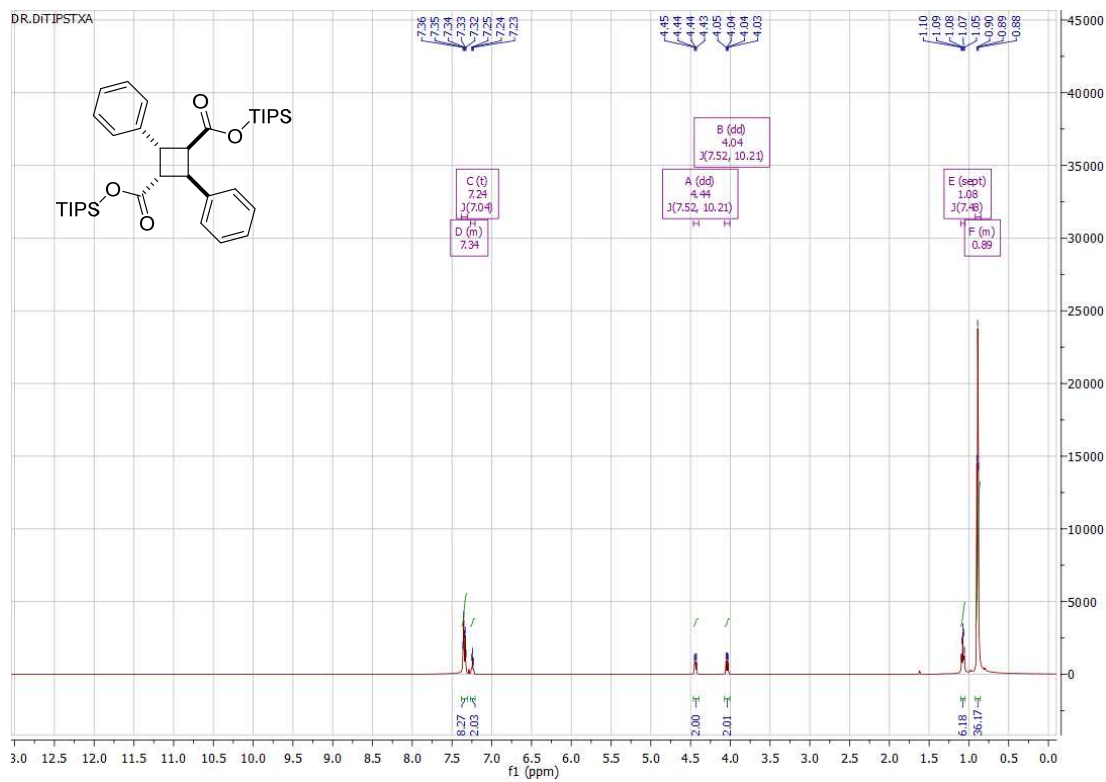

# $^{13}\text{C}$ NMR of $\alpha$ -TADSE-2

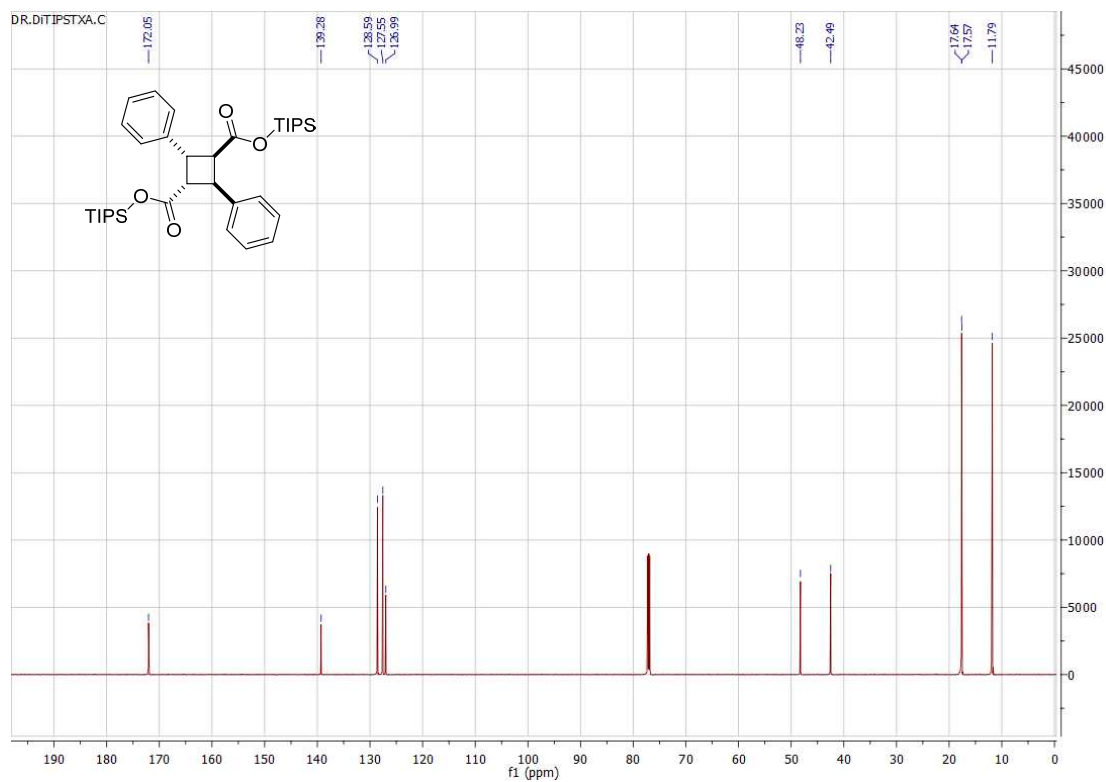

# <sup>1</sup>H NMR of α-2-MeO-TAMSE-2

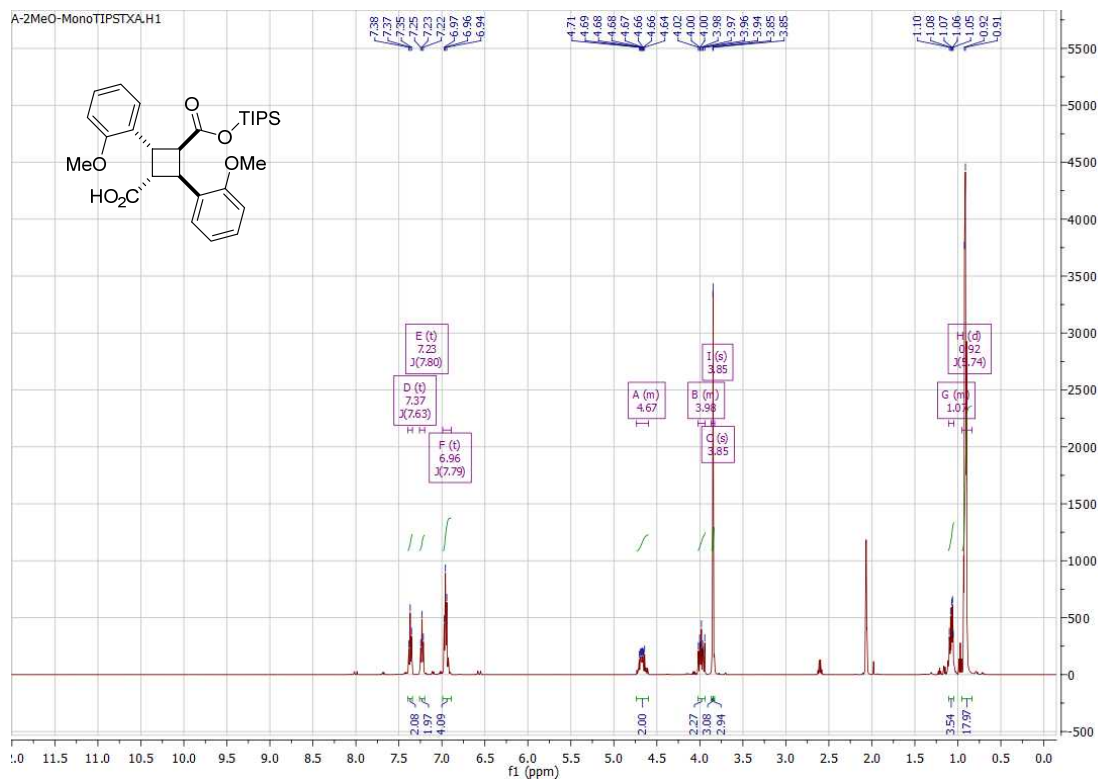

# <sup>13</sup>C NMR of α-2-MeO-TAMSE-2

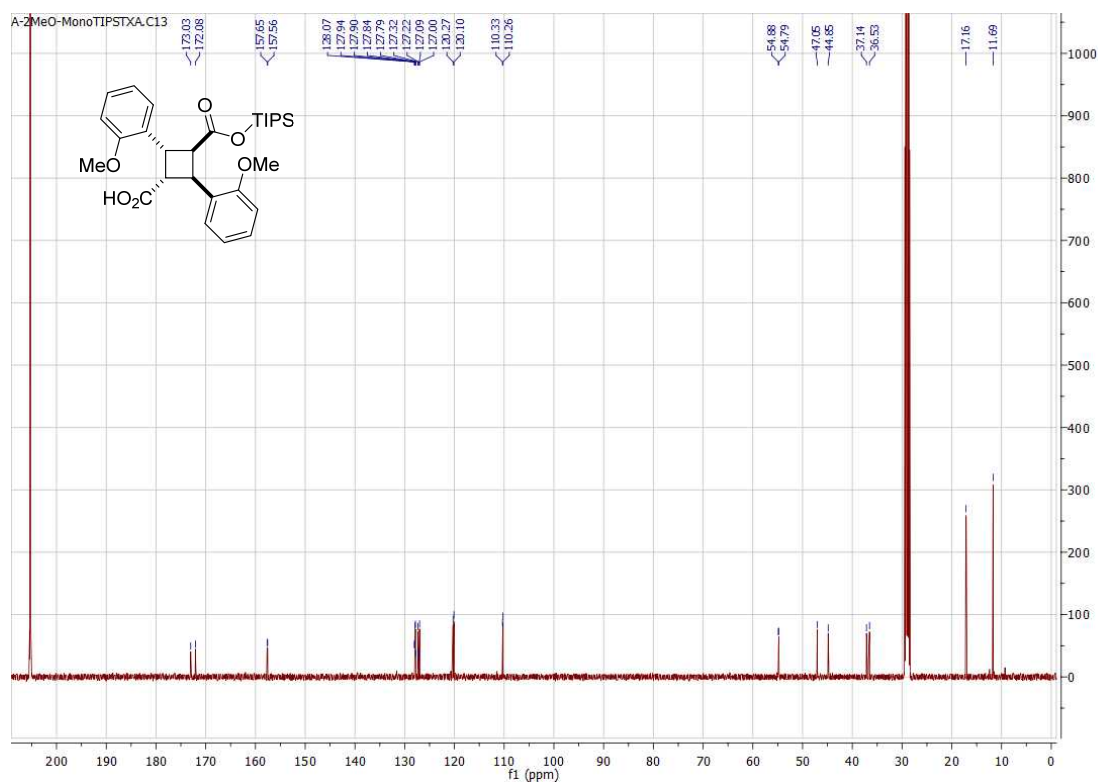

# <sup>1</sup>H NMR of $\alpha$ -2-MeO-TADSE-2

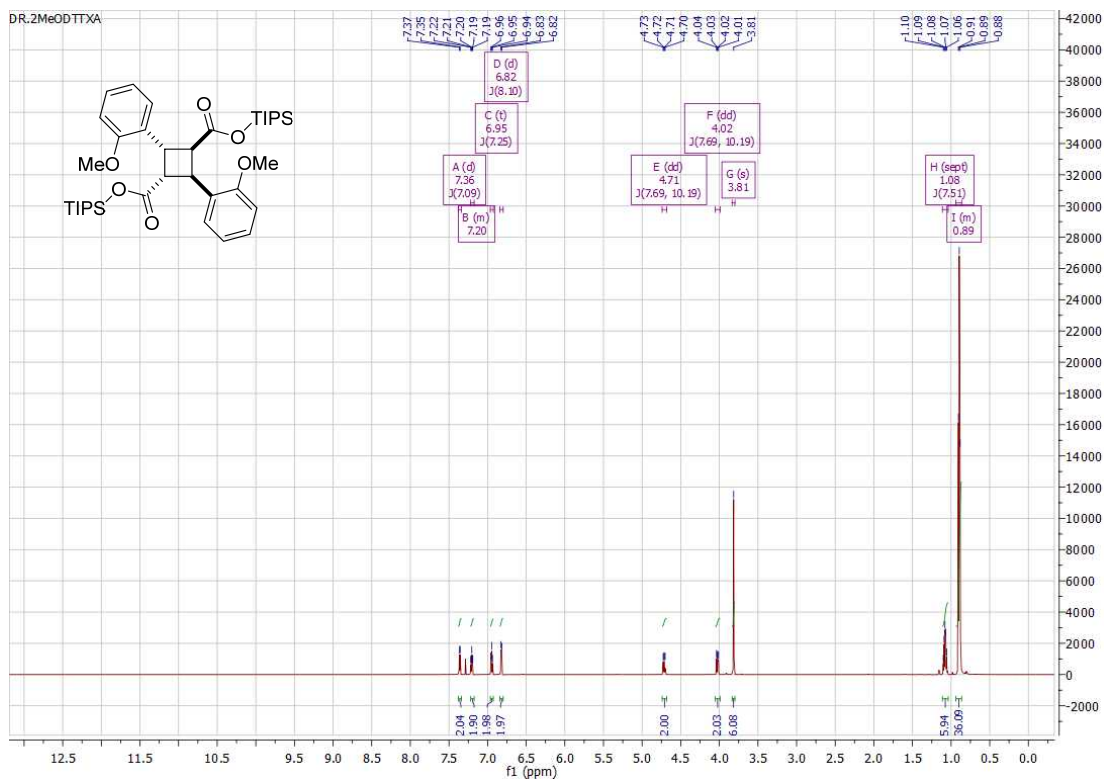

# <sup>13</sup>C NMR of $\alpha$ -2-MeO-TADSE-2

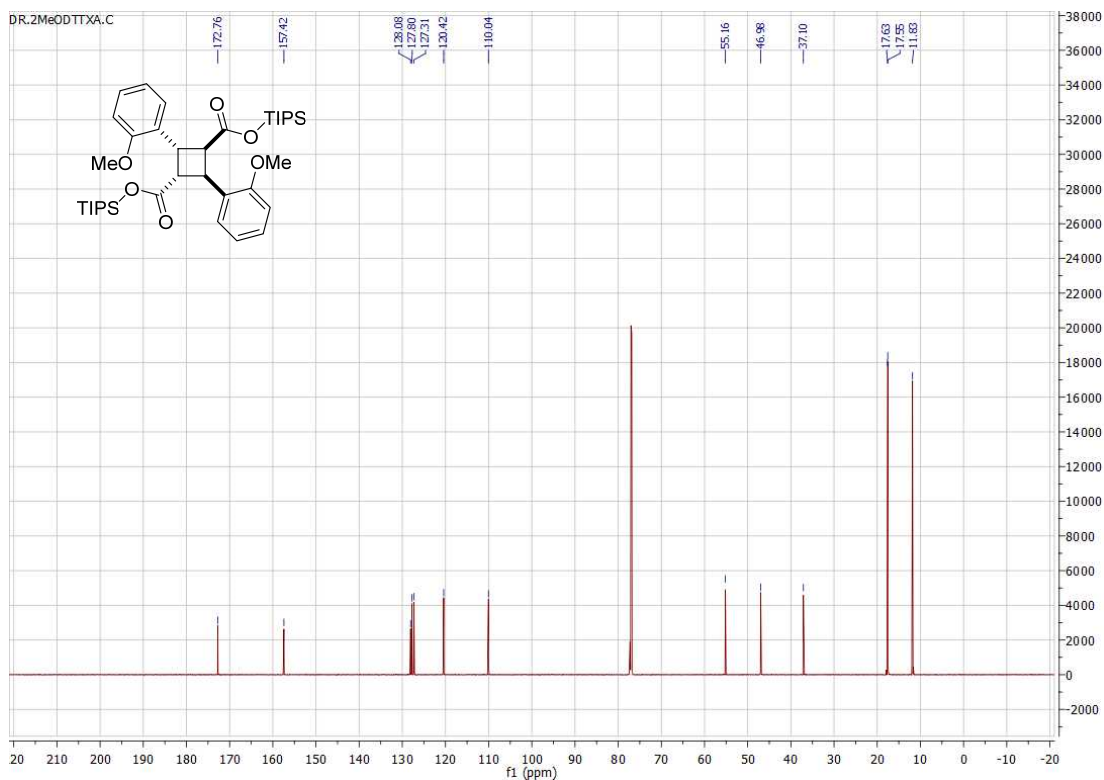

<sup>1</sup>H NMR of **α-1**

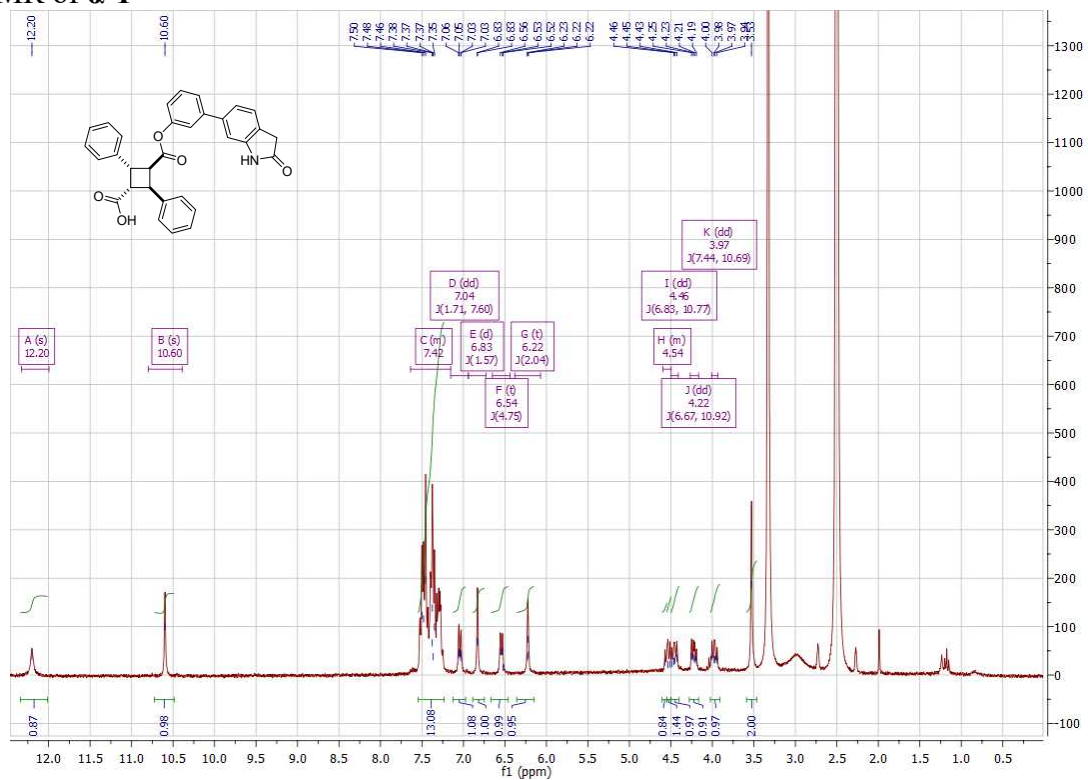

<sup>13</sup>C NMR of **α-1**

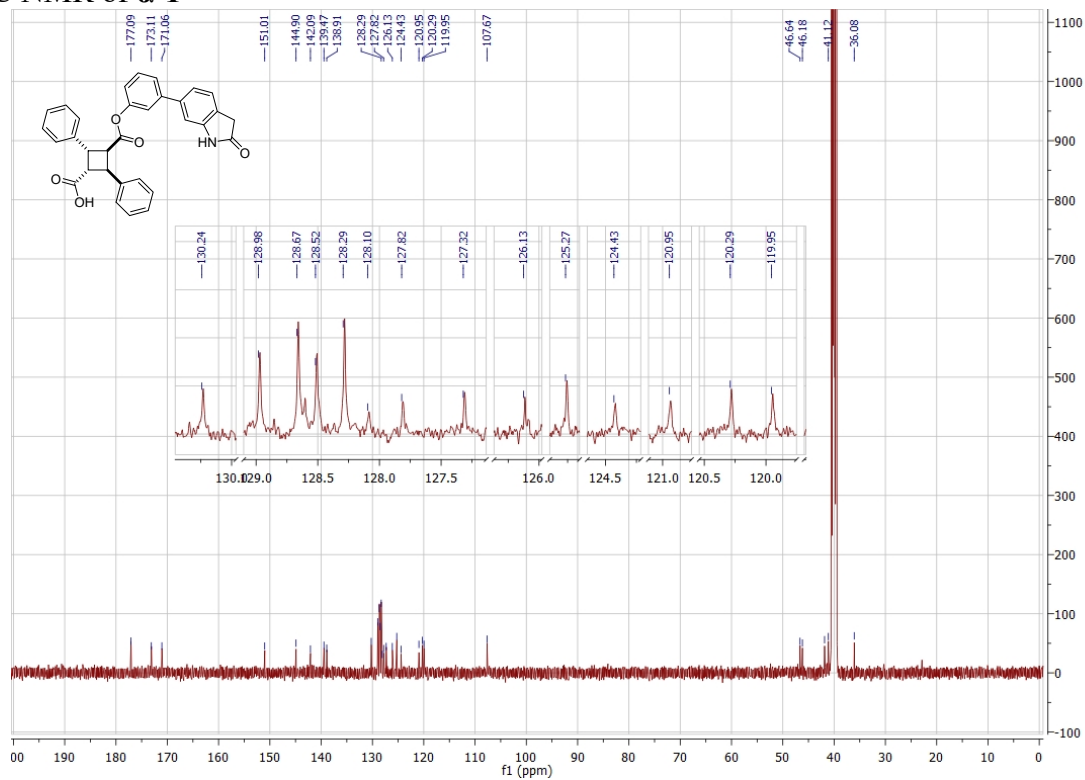

# <sup>1</sup>H NMR of ***α*-2**

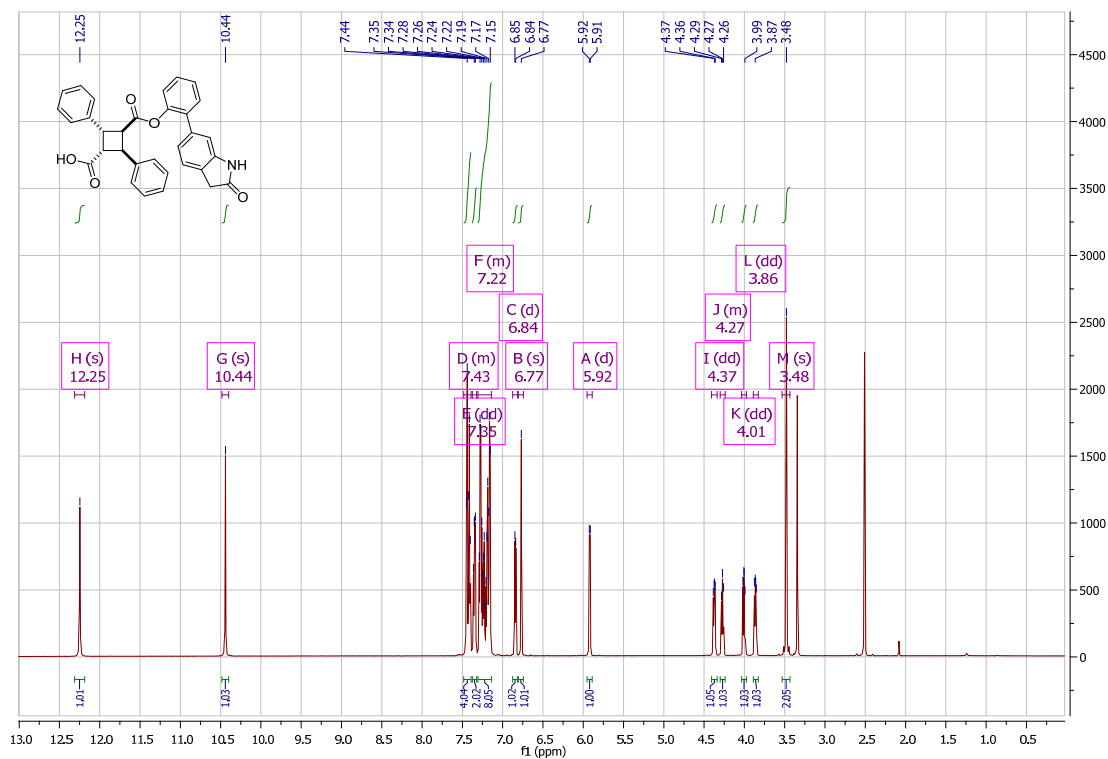

# <sup>13</sup>C NMR of ***α*-2**

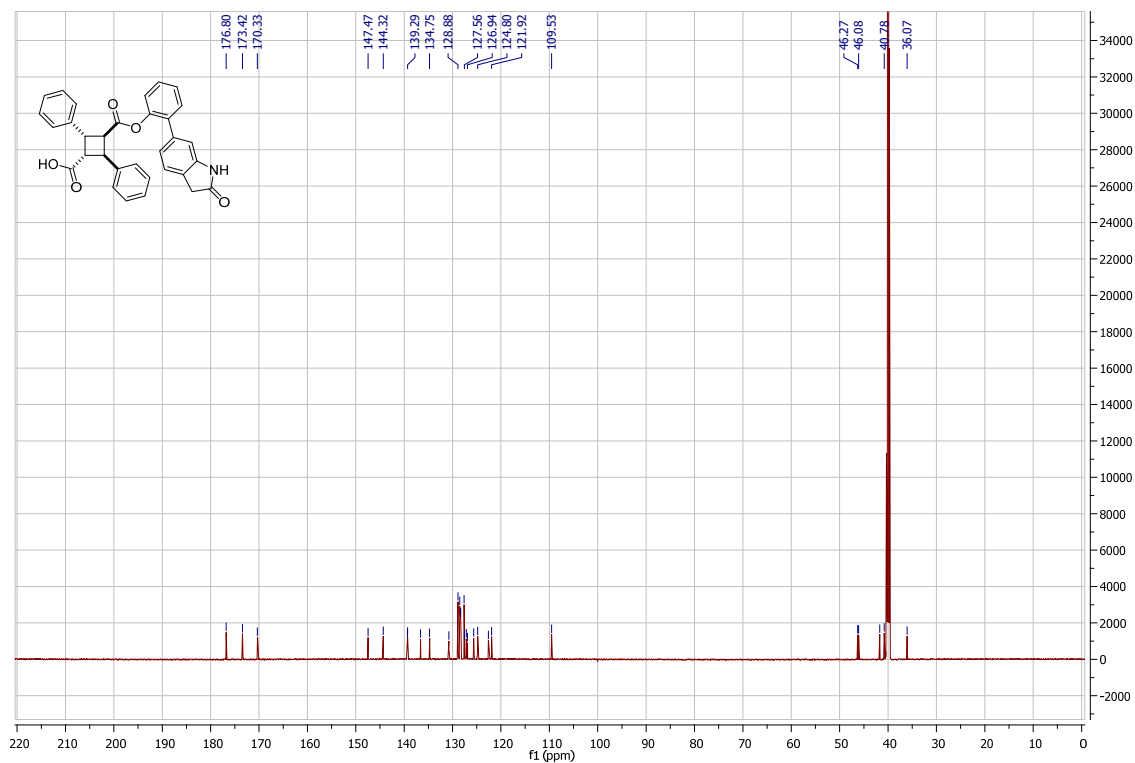

<sup>1</sup>H NMR of **a-3**

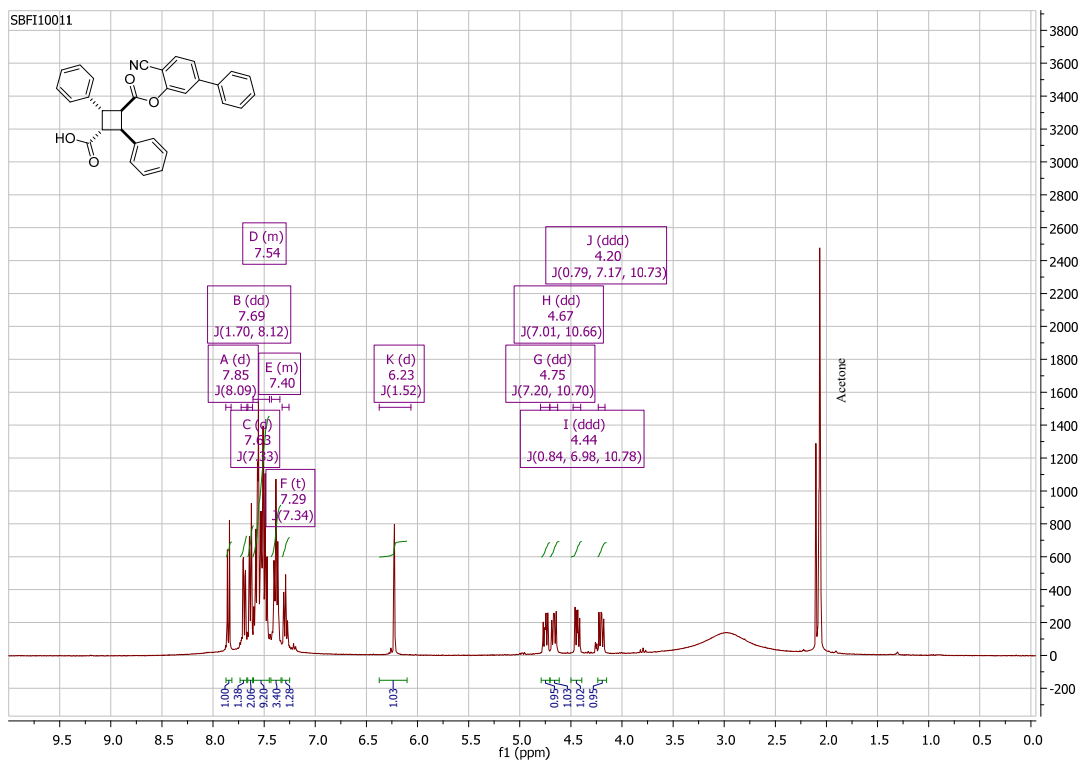

<sup>13</sup>C NMR of **a-3**

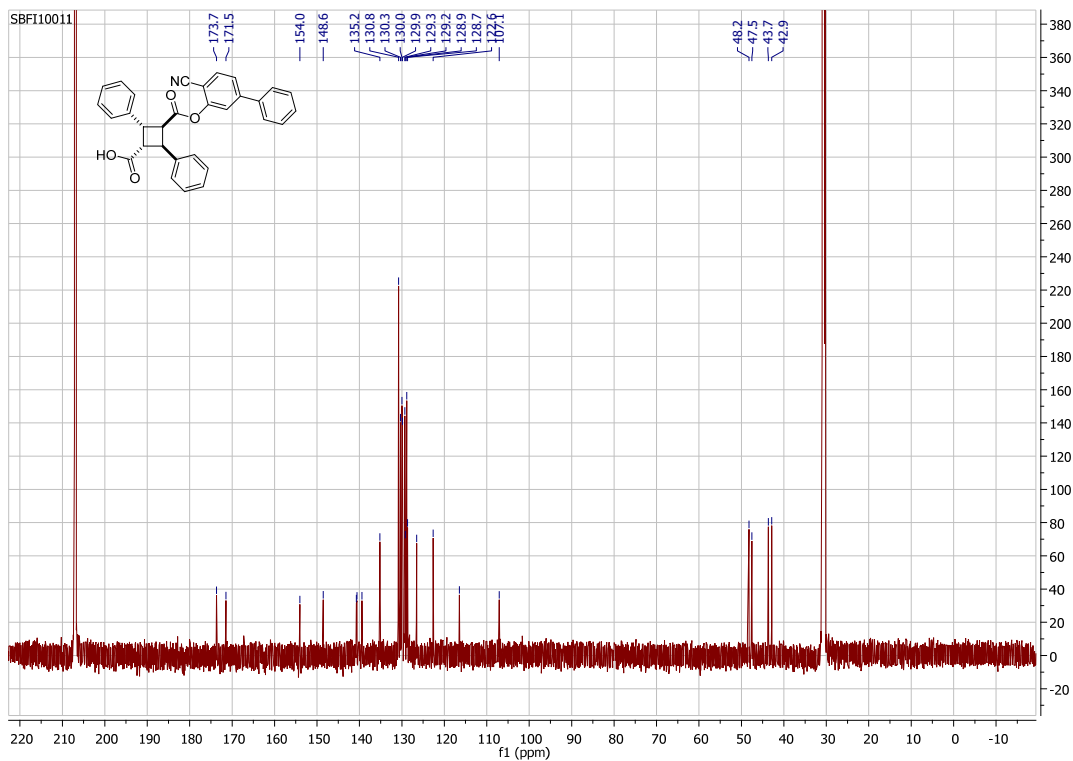



# $^1\text{H}$ NMR of $\alpha$ -4

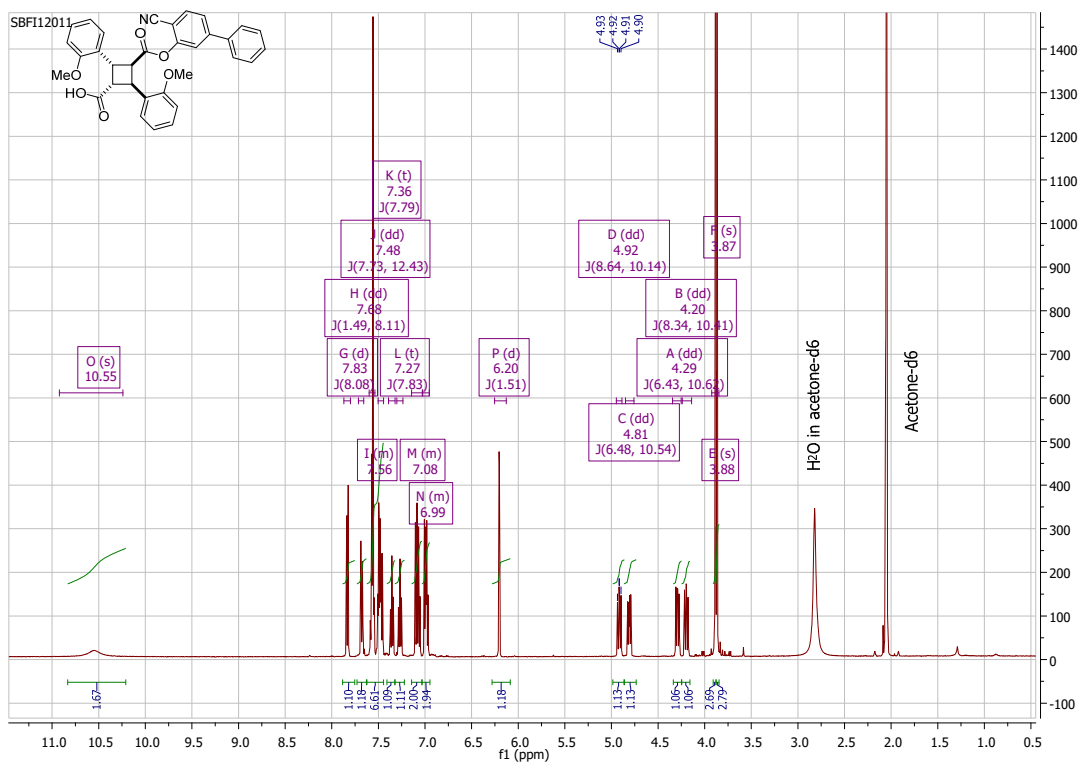

# $^{13}\text{C}$ NMR of $\alpha$ -4

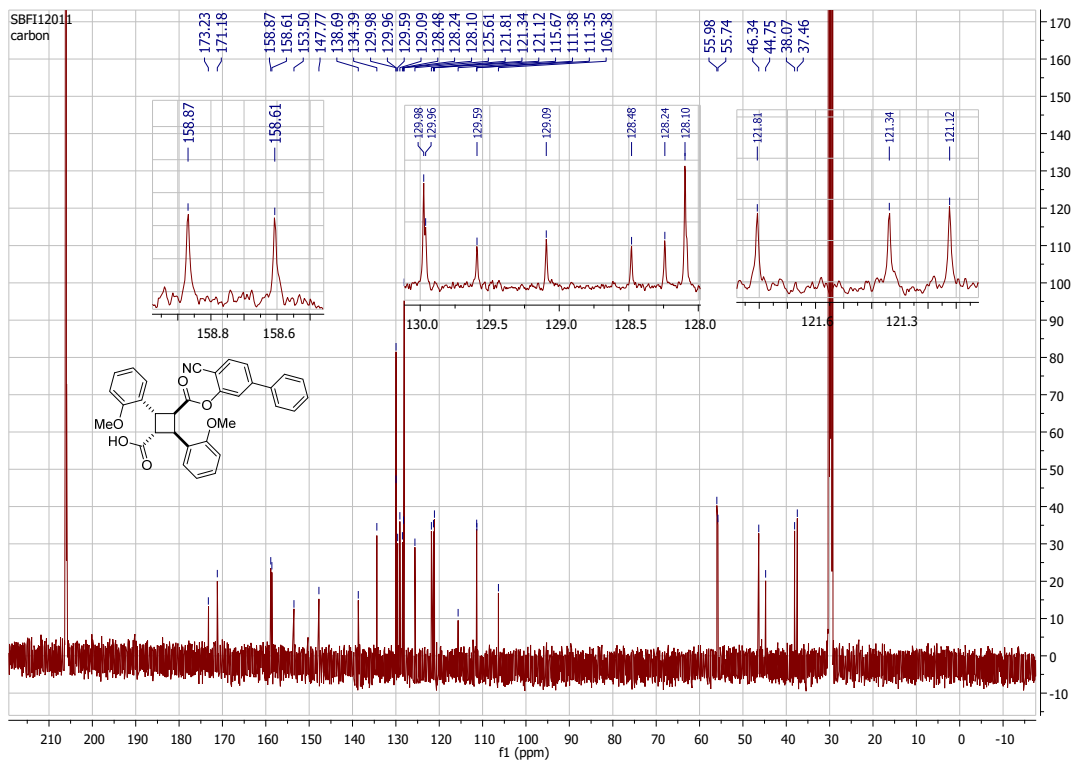

<sup>1</sup>H NMR of ***α*-5**

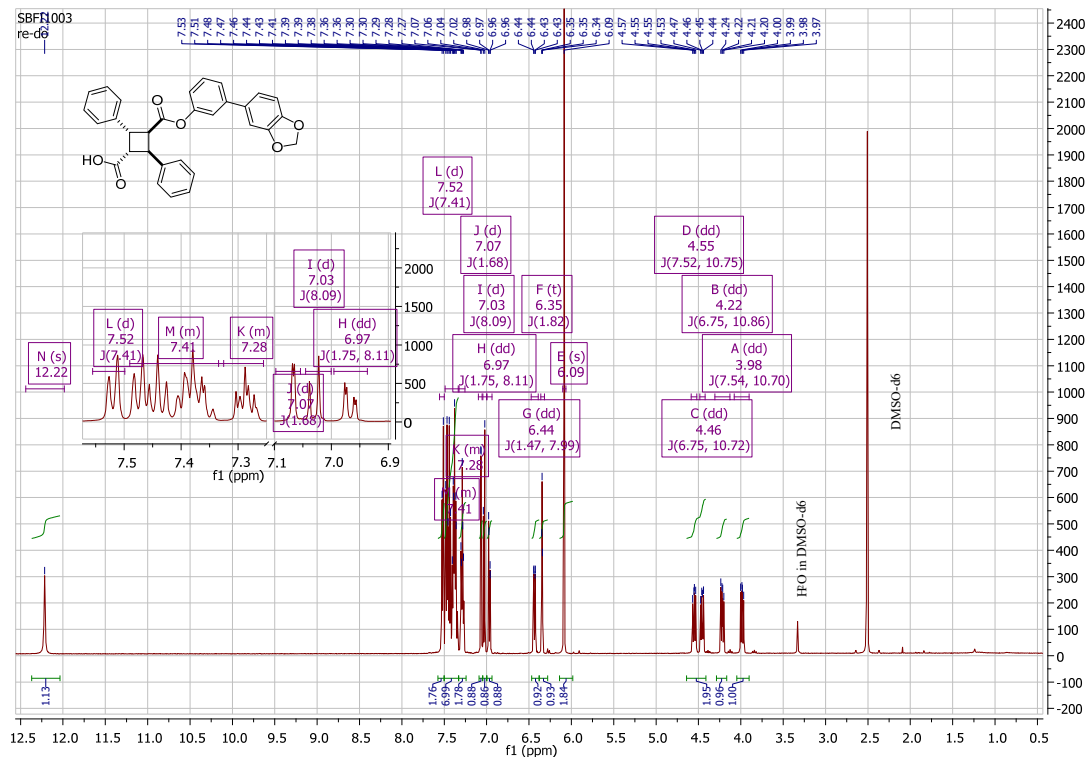

<sup>13</sup>C NMR of ***α*-5**

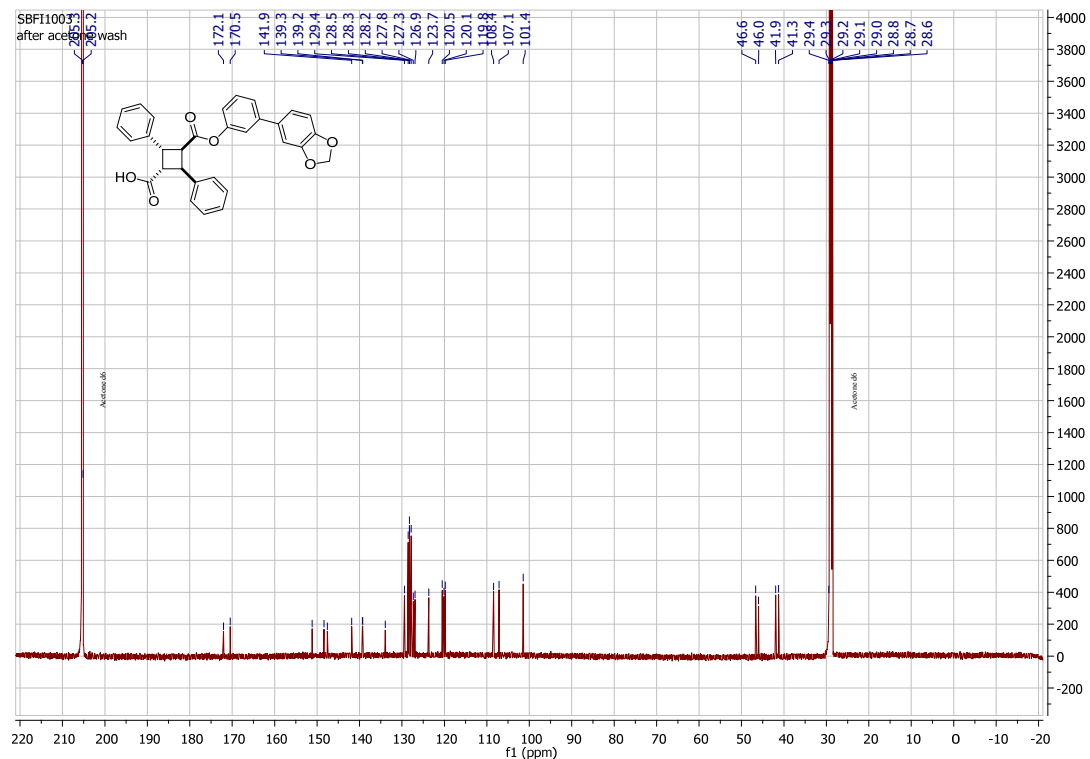

<sup>1</sup>H NMR of **α-6**

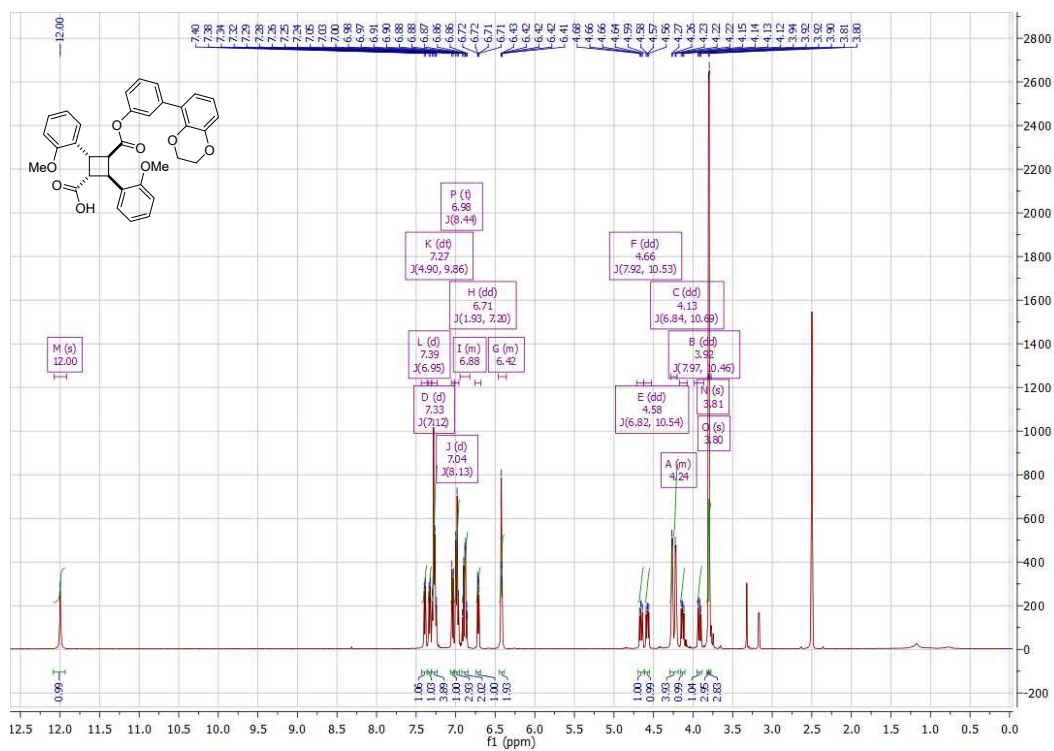

<sup>13</sup>C NMR of **α-6**

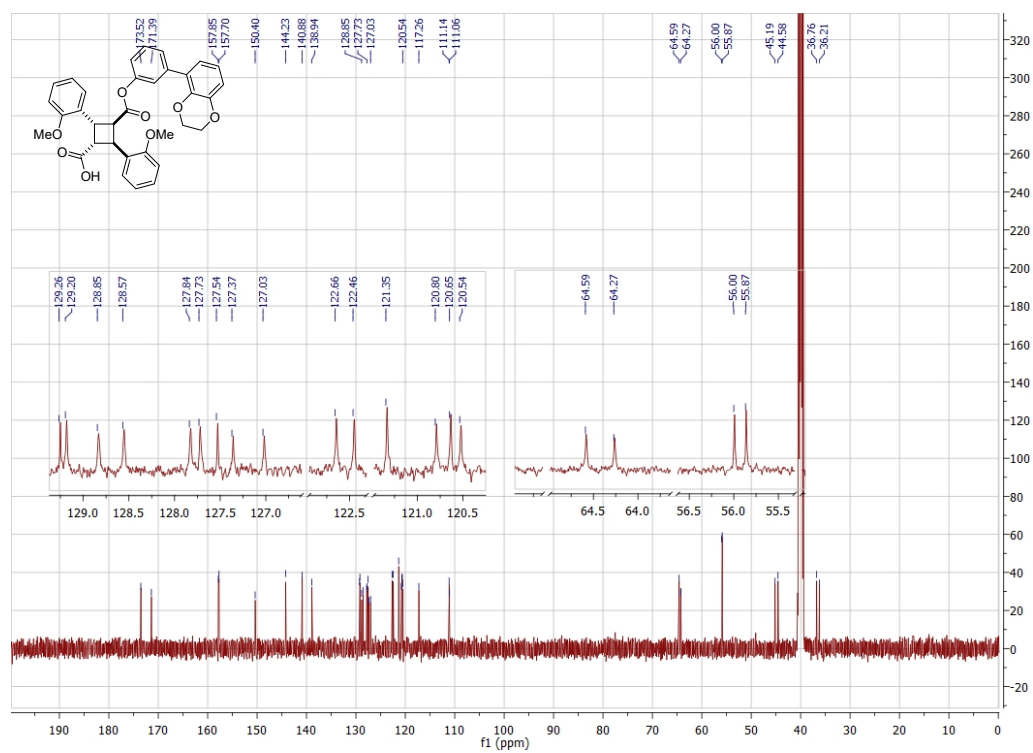

<sup>1</sup>H NMR of **α-7**

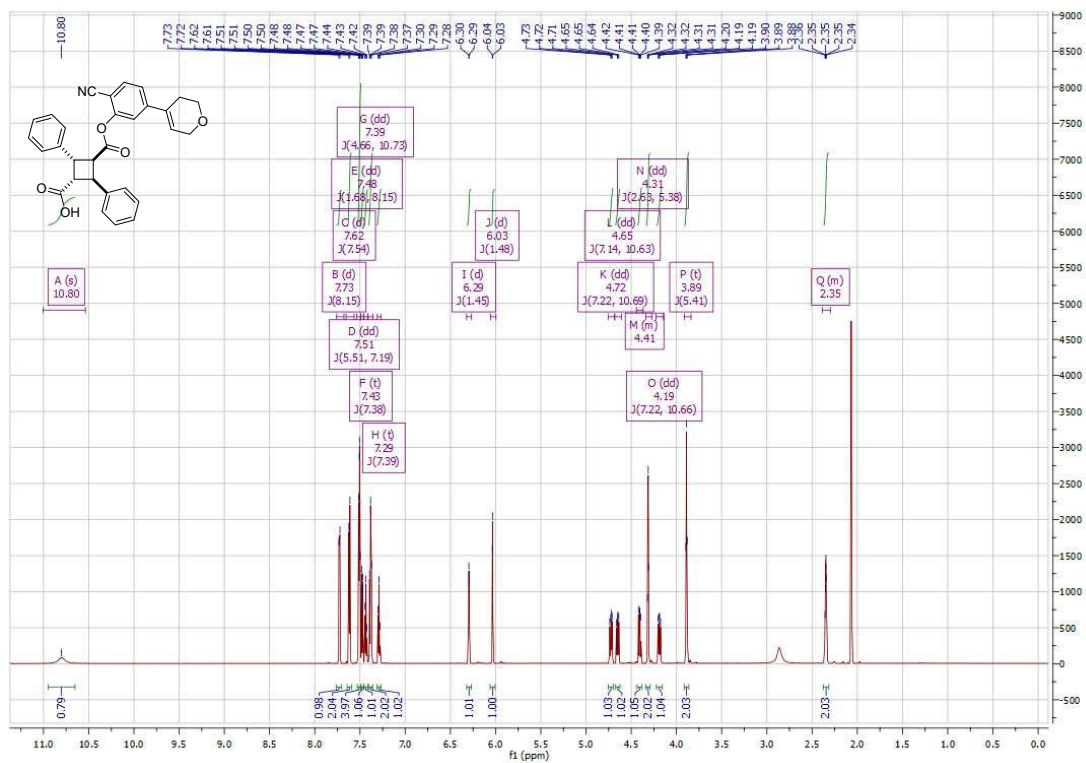

<sup>13</sup>C NMR of **α-7**

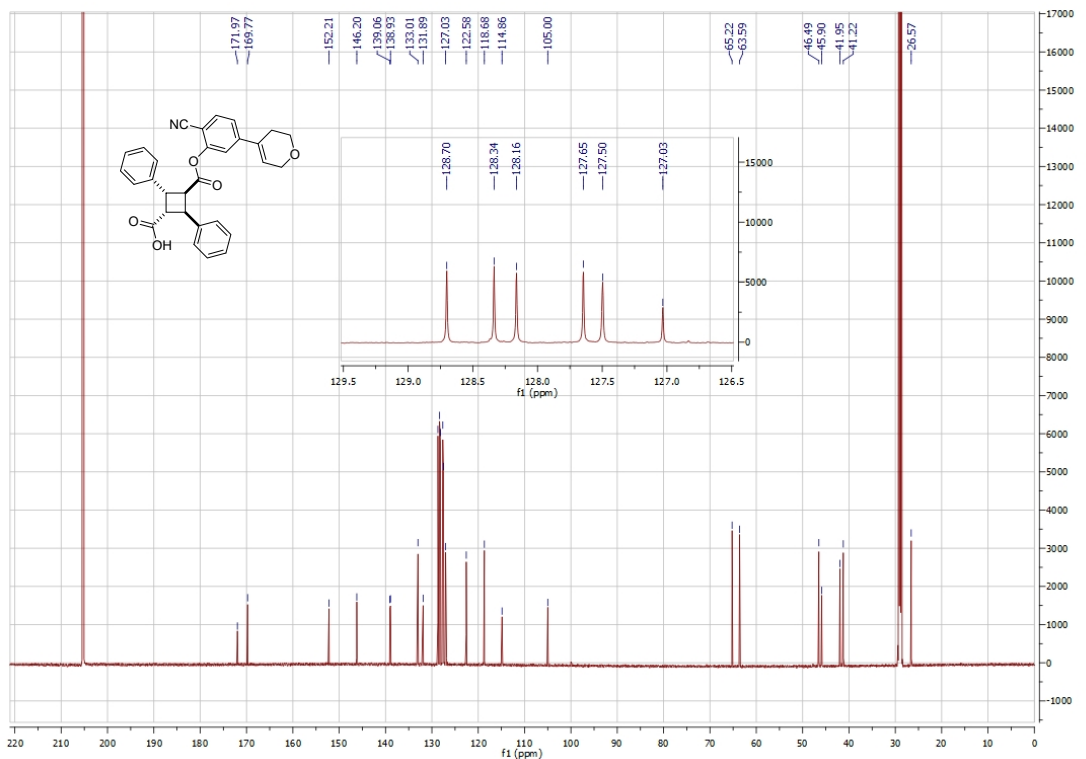

<sup>1</sup>H NMR of ***α*-8**

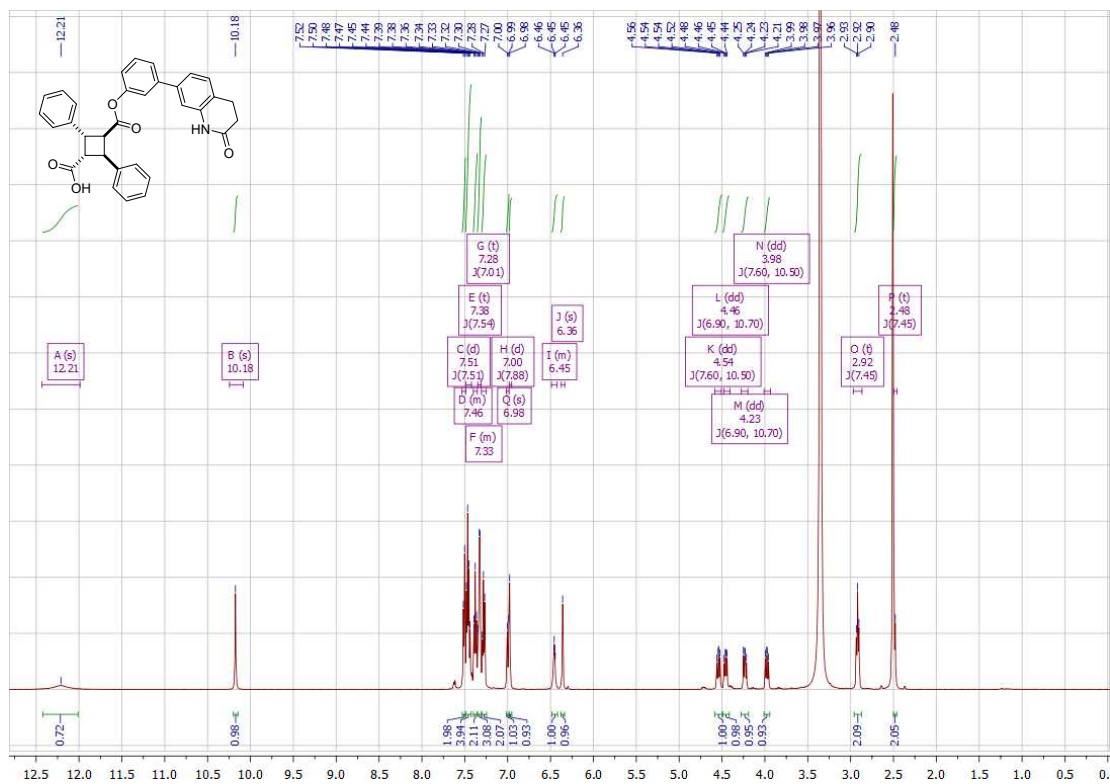

<sup>13</sup>C NMR of ***α*-8**

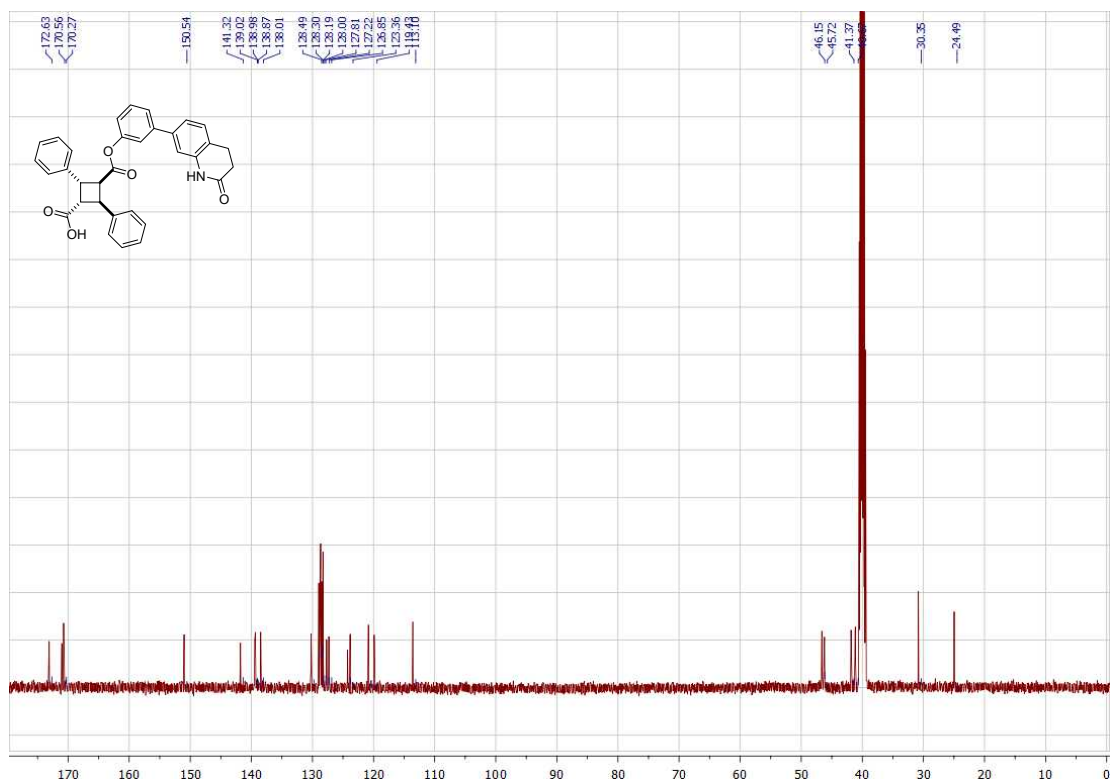

<sup>1</sup>H NMR of **α-9**

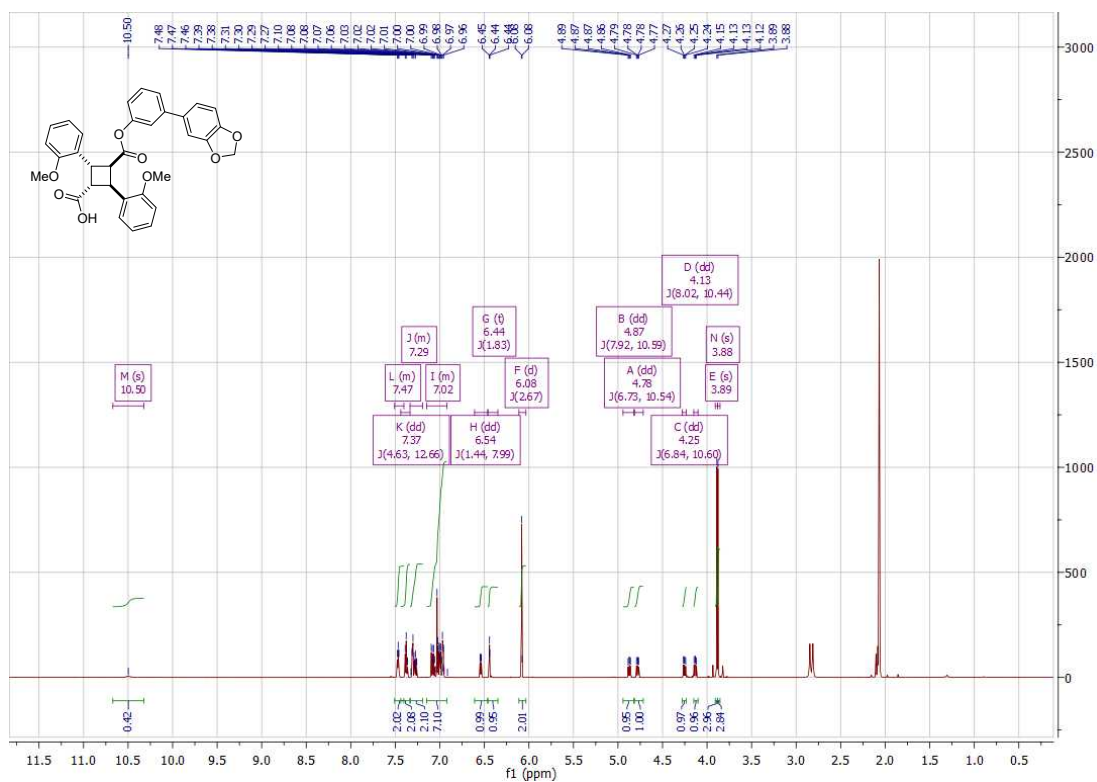

<sup>13</sup>C NMR of **α-9**

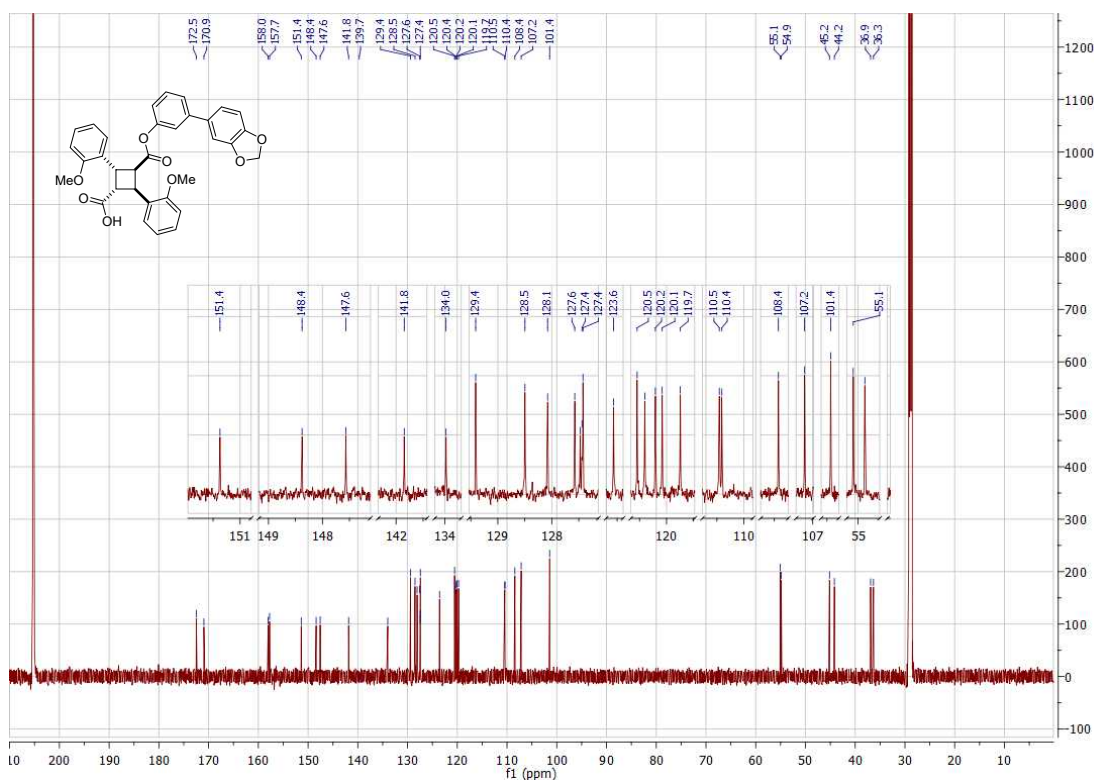

# <sup>1</sup>H NMR of $\alpha$ -10

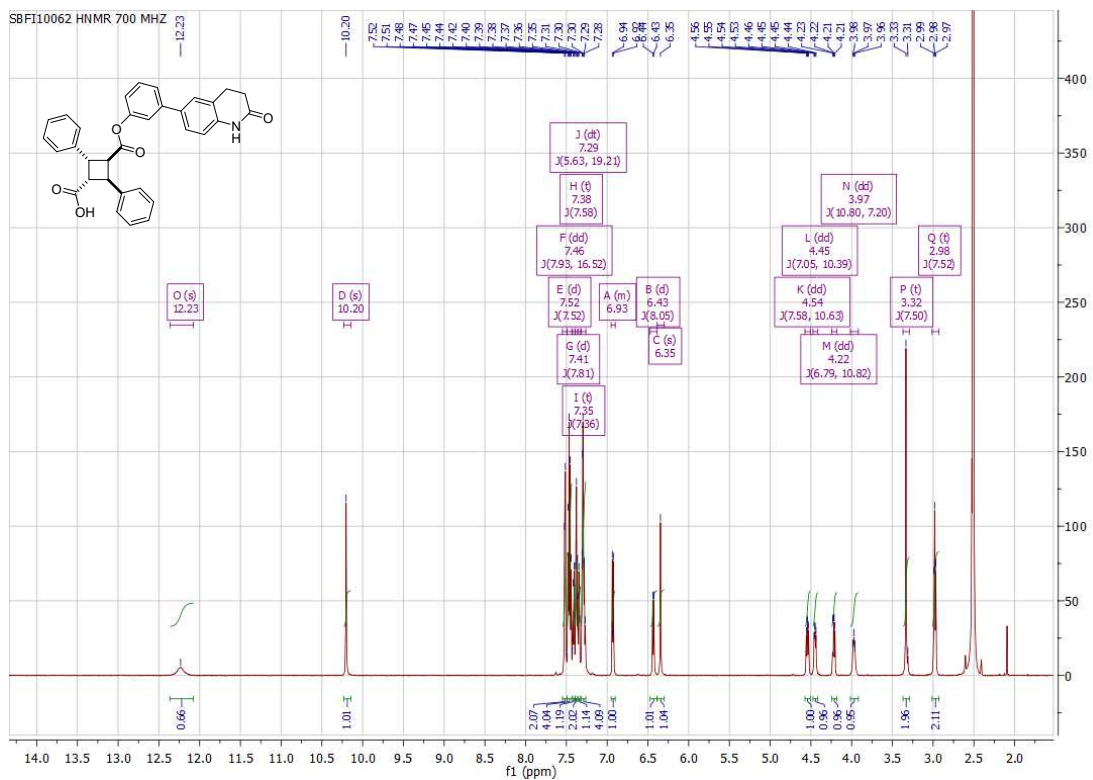

# <sup>13</sup>C NMR of $\alpha$ -10

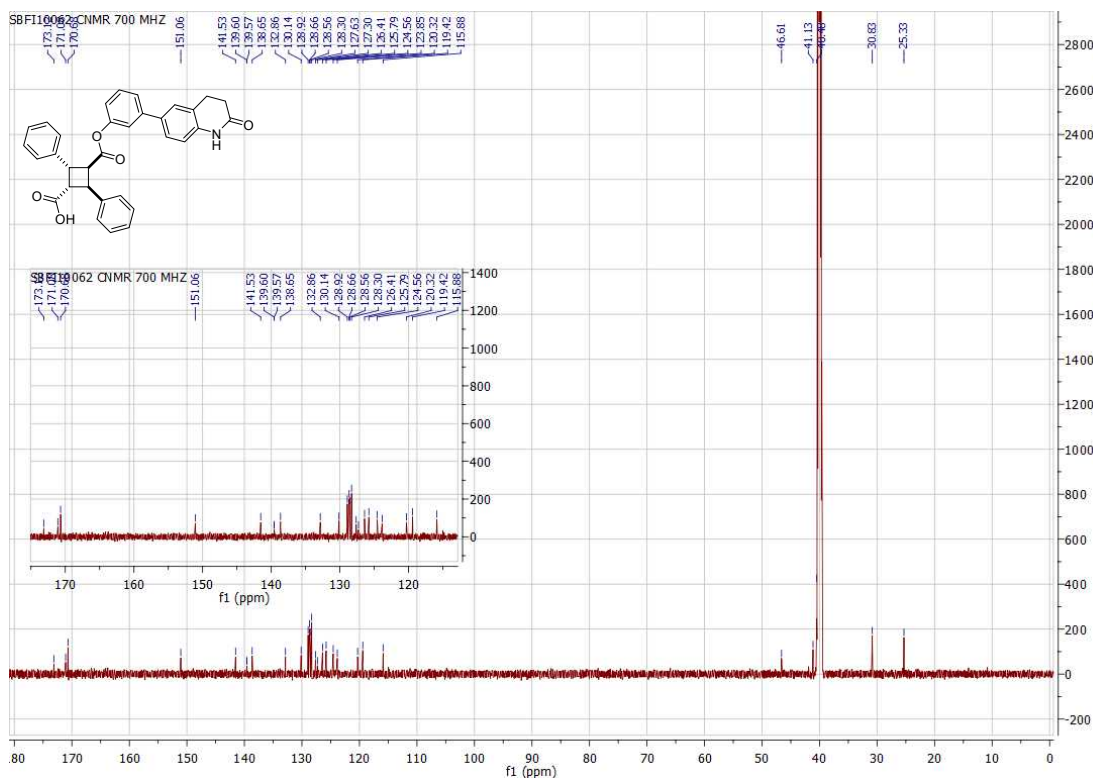

$^1\text{H}$  NMR of ***\alpha***-11

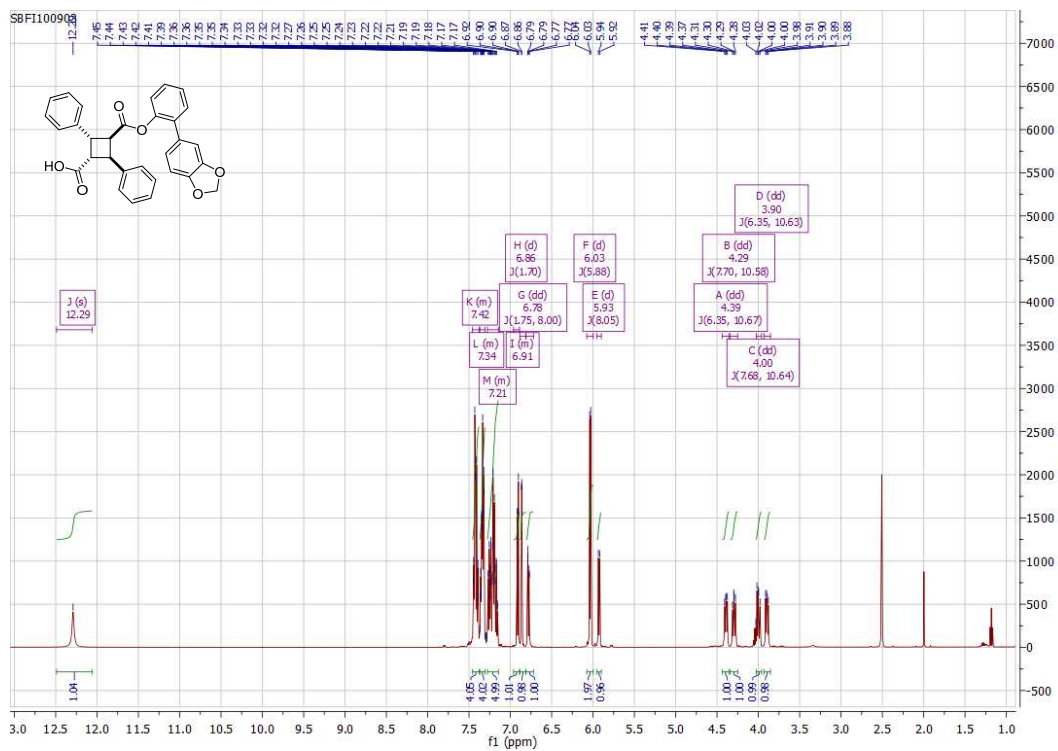

$^{13}\text{C}$  NMR of ***\alpha***-11

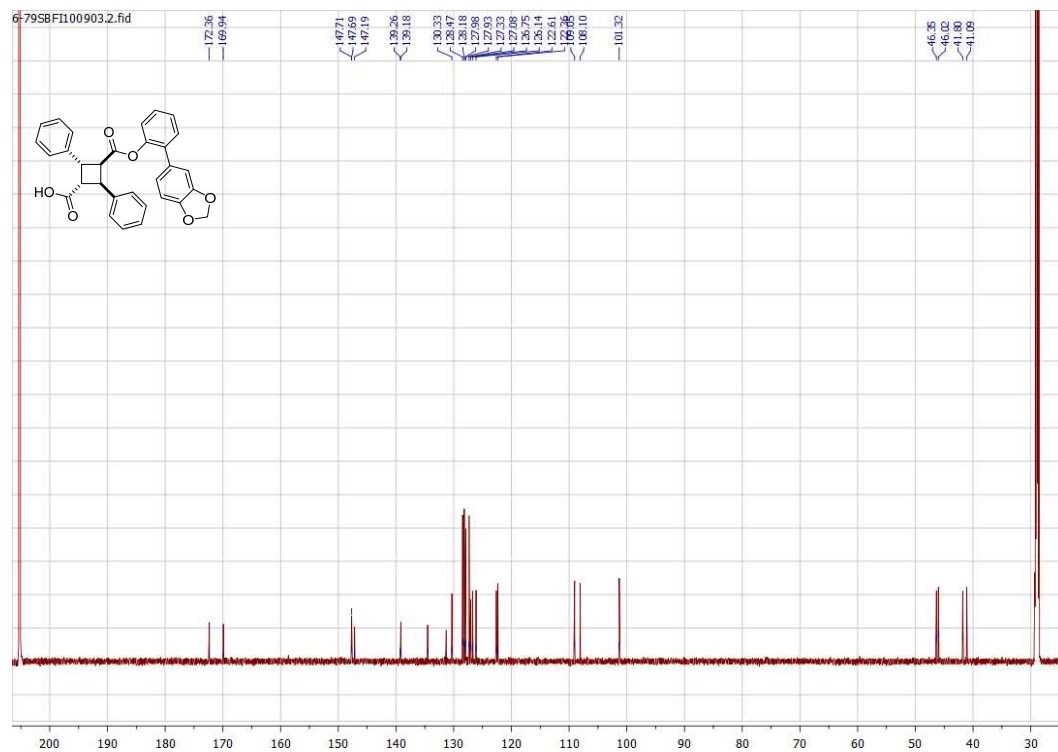



# <sup>1</sup>H NMR of ***α*-12**

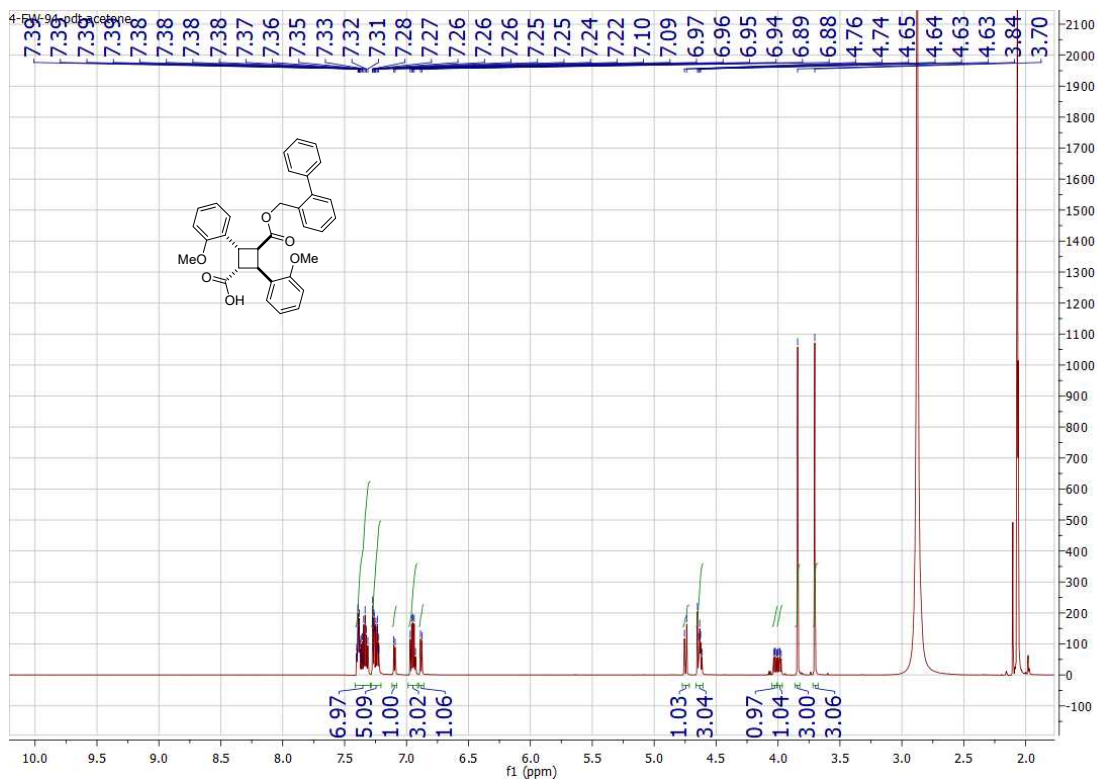

# <sup>13</sup>C NMR of ***α*-12**

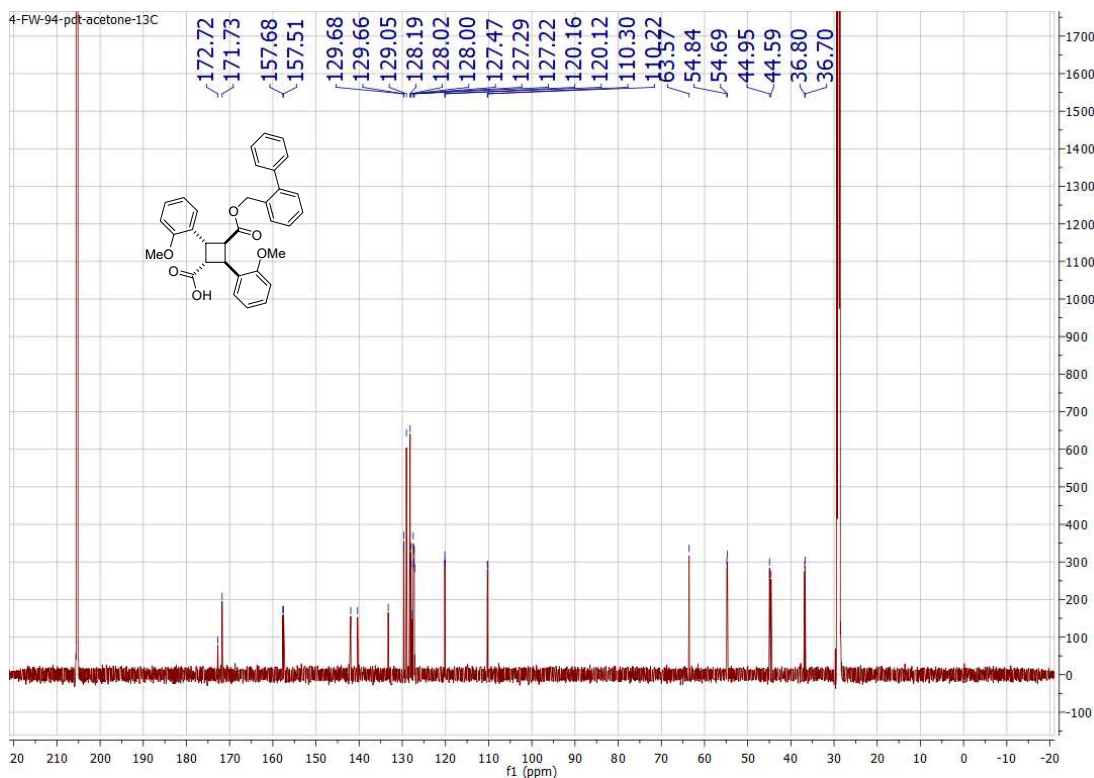

# <sup>1</sup>H NMR of **α-13**

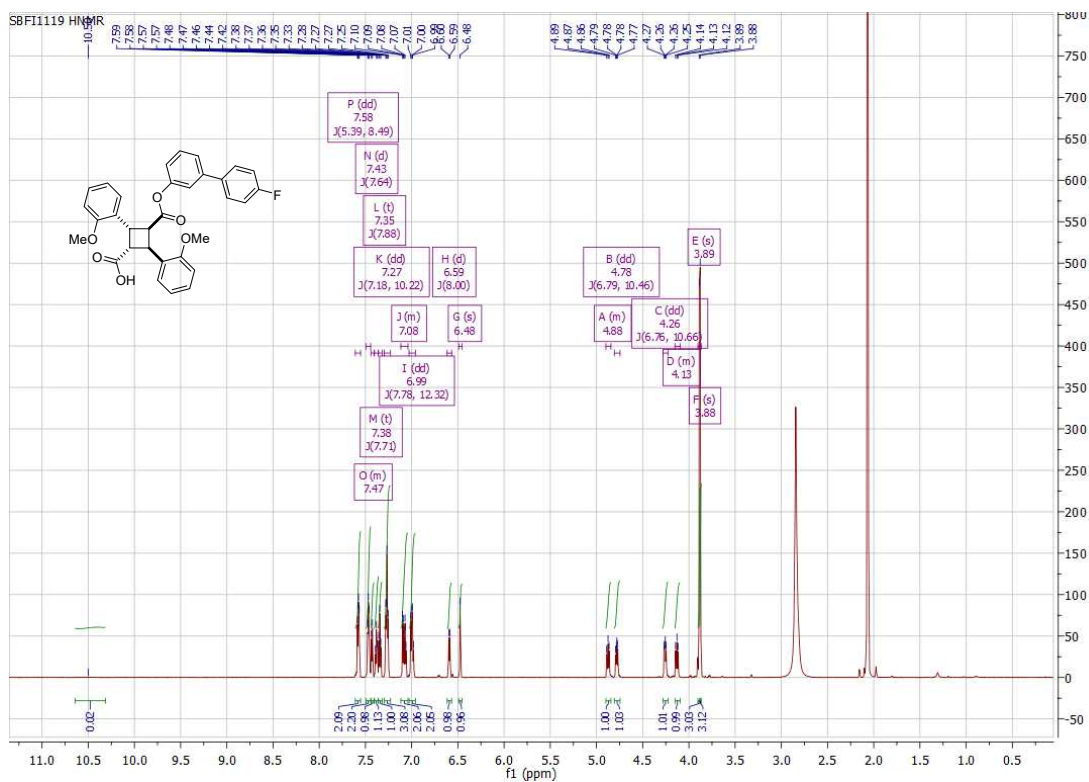

# <sup>13</sup>C NMR of **α-13**

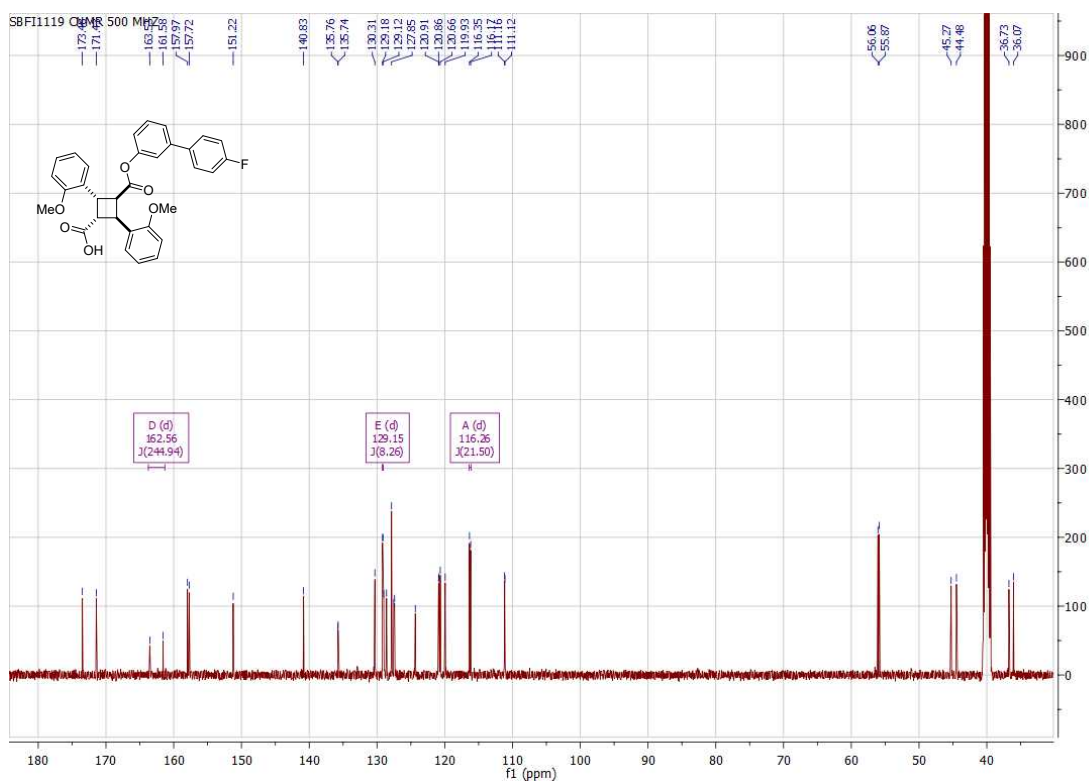

# $^{19}\text{F}$ NMR of $\alpha$ -13

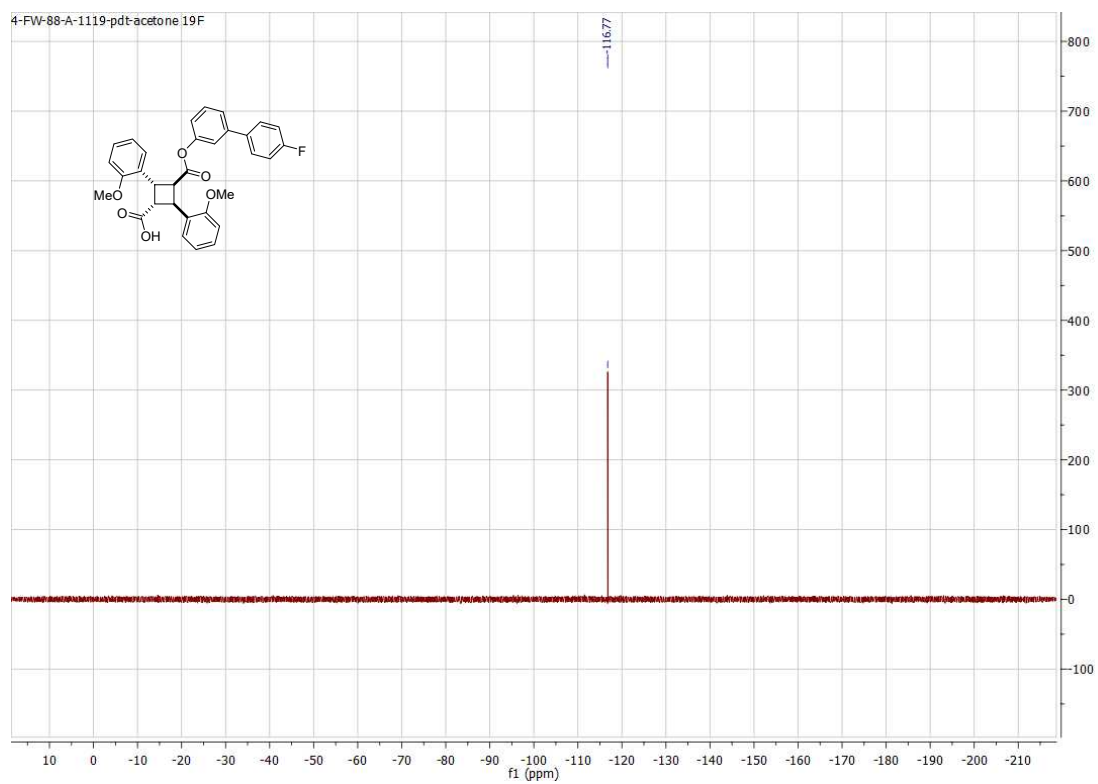

<sup>1</sup>H NMR of **α-14**

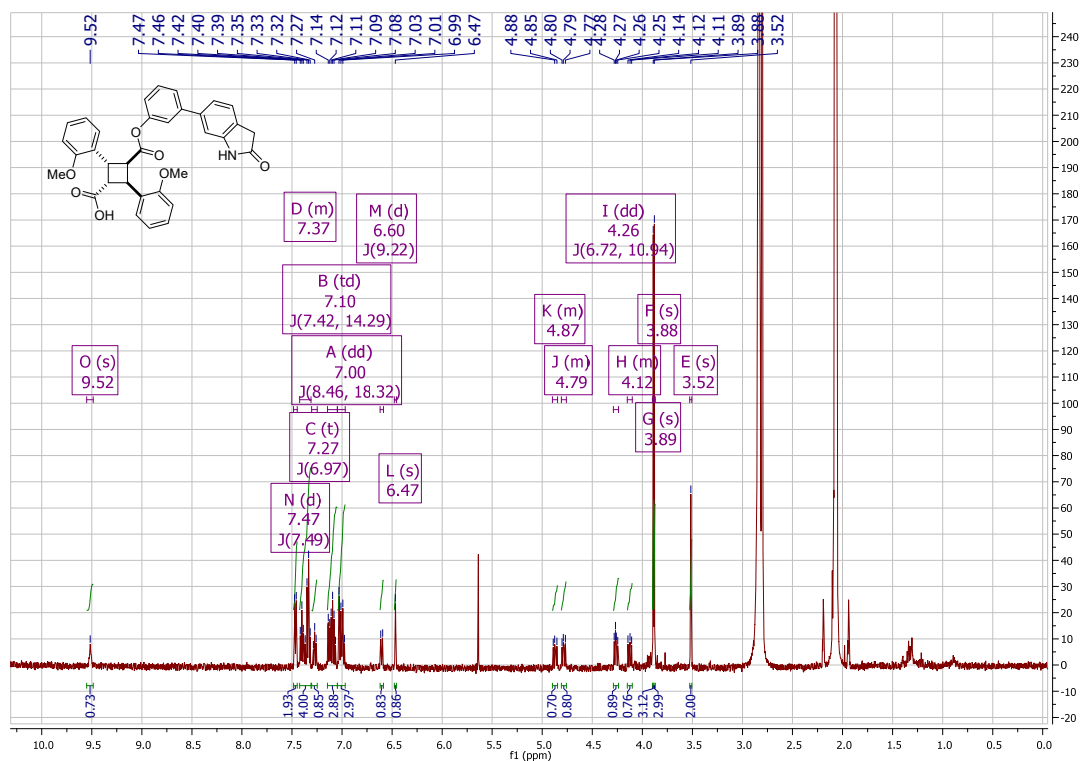

<sup>13</sup>C NMR of **α-14**

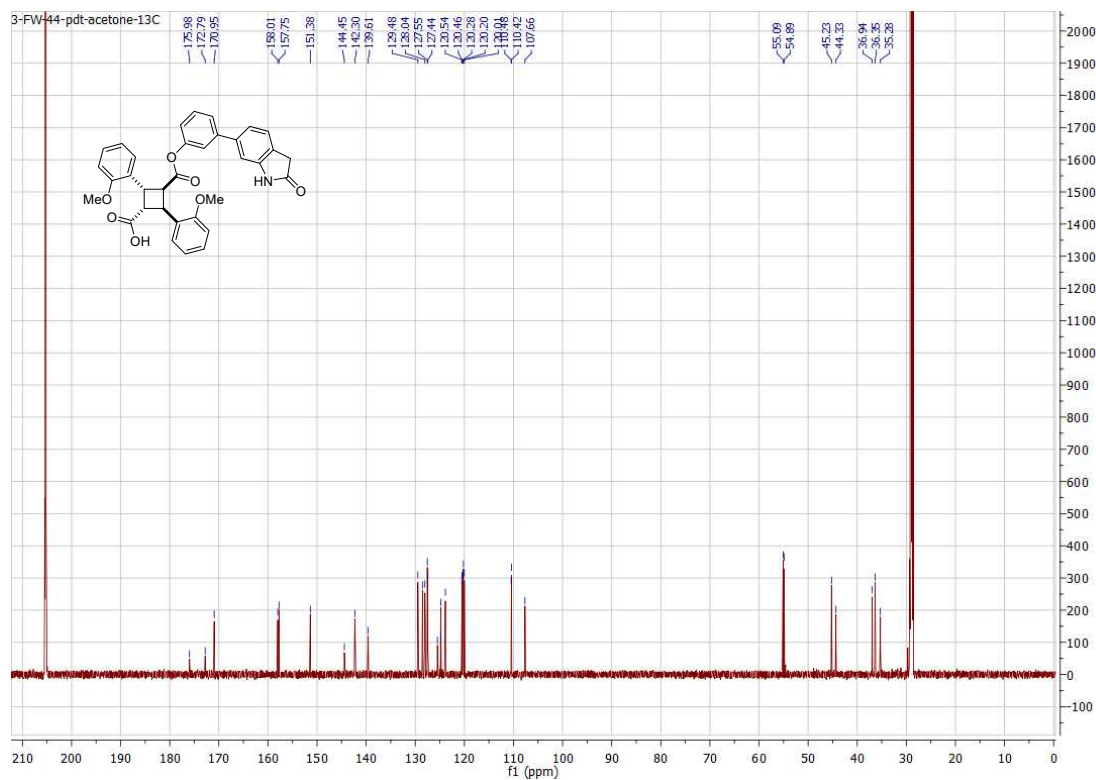

<sup>1</sup>H NMR of **α-15**

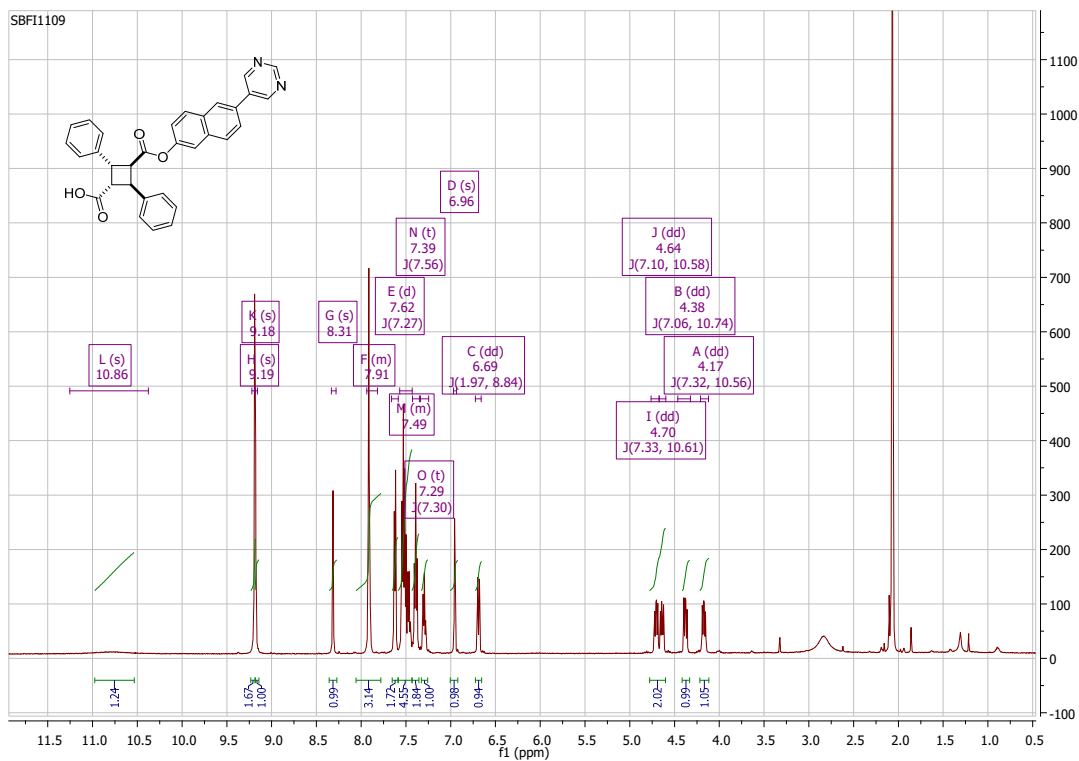

<sup>13</sup>C NMR of **α-15**

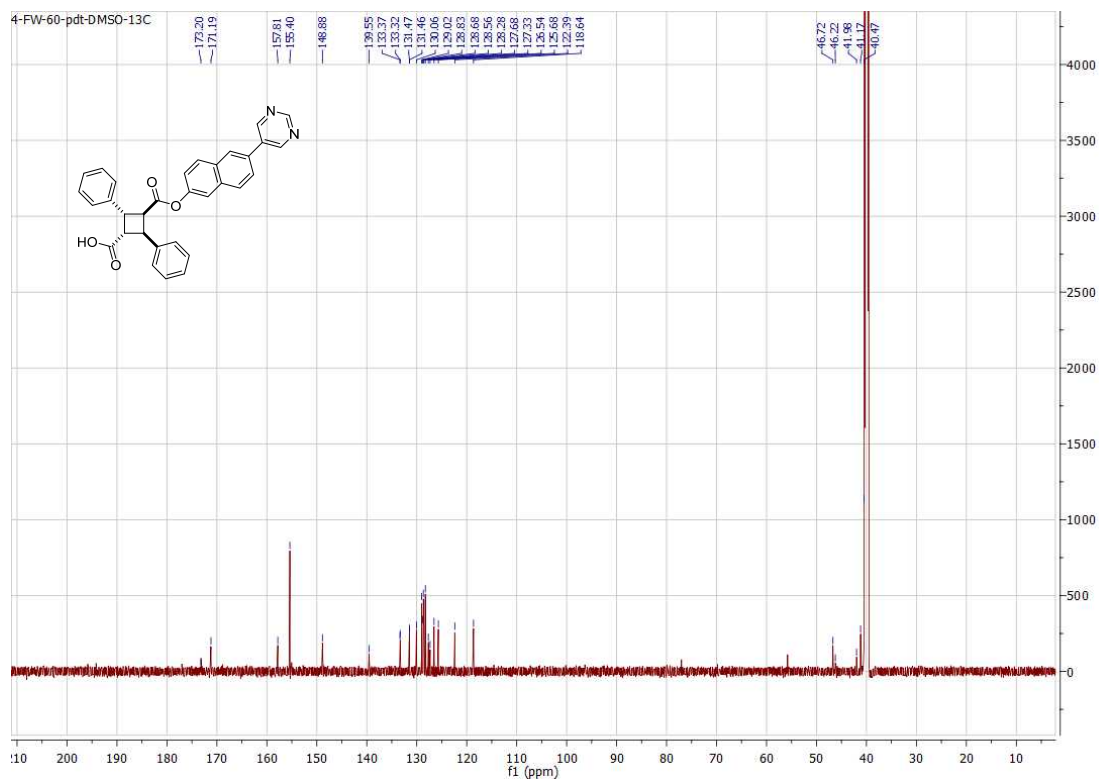

<sup>1</sup>H NMR of ***α*-16**

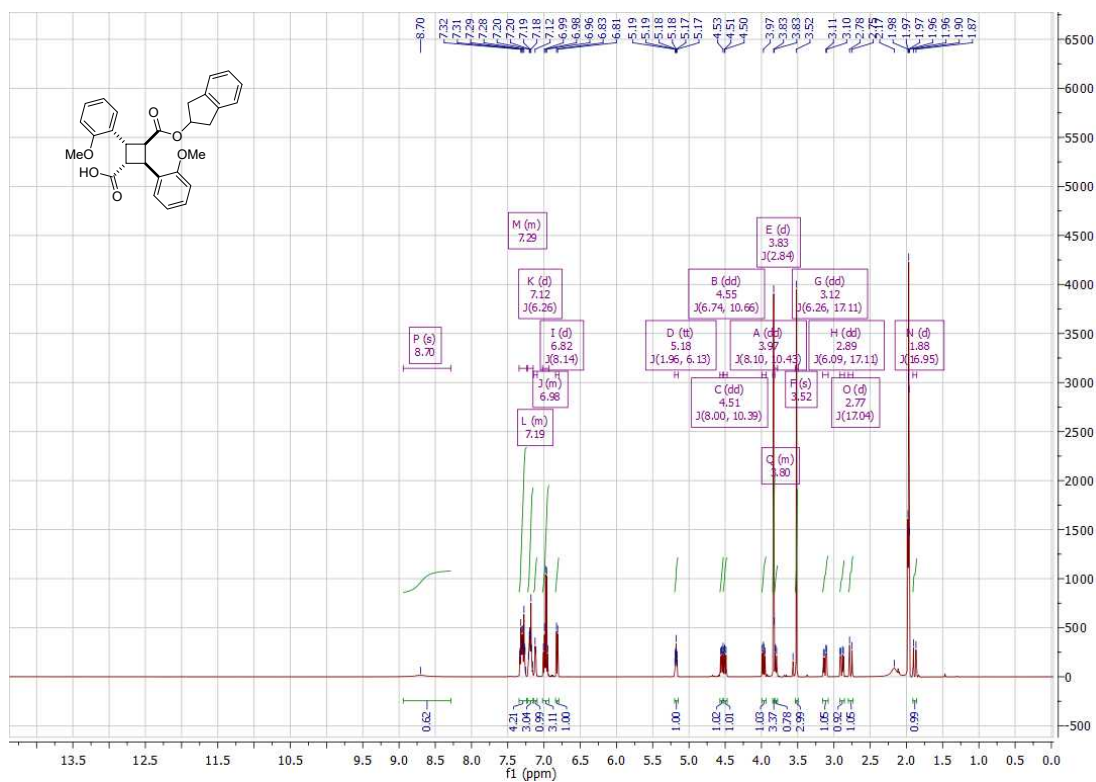

<sup>13</sup>C NMR of ***α*-16**

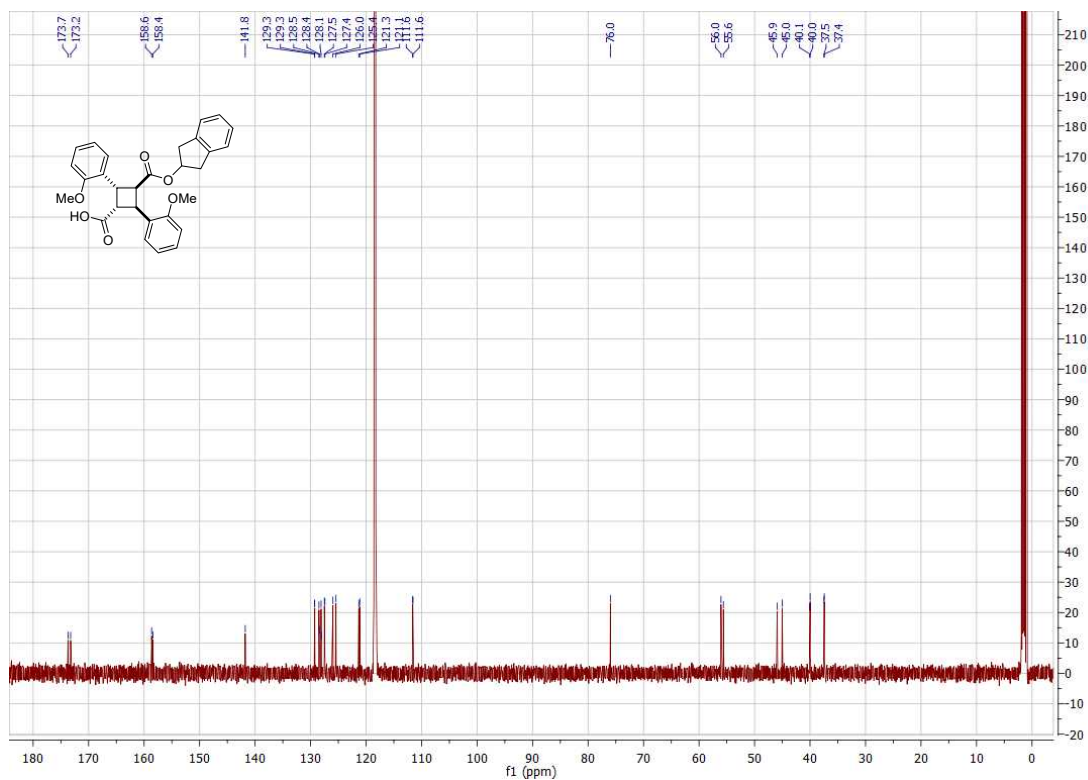

$^1\text{H}$  NMR of  $\alpha$ -17

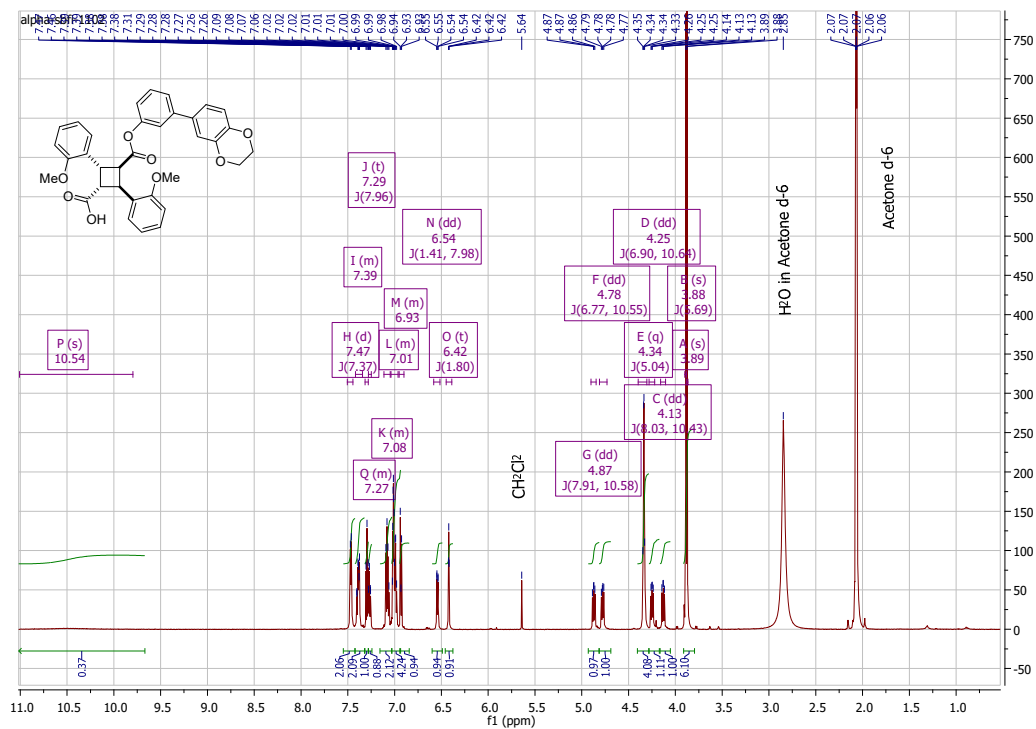

$^{13}\text{C}$  NMR of  $\alpha$ -17

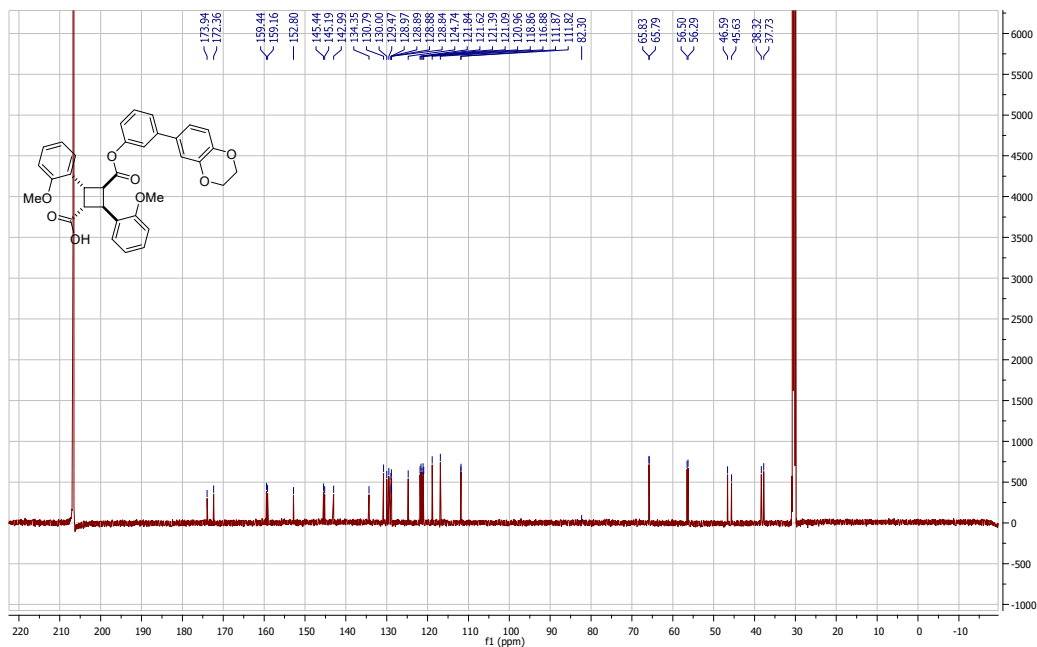

<sup>1</sup>H NMR of ***α*-18**

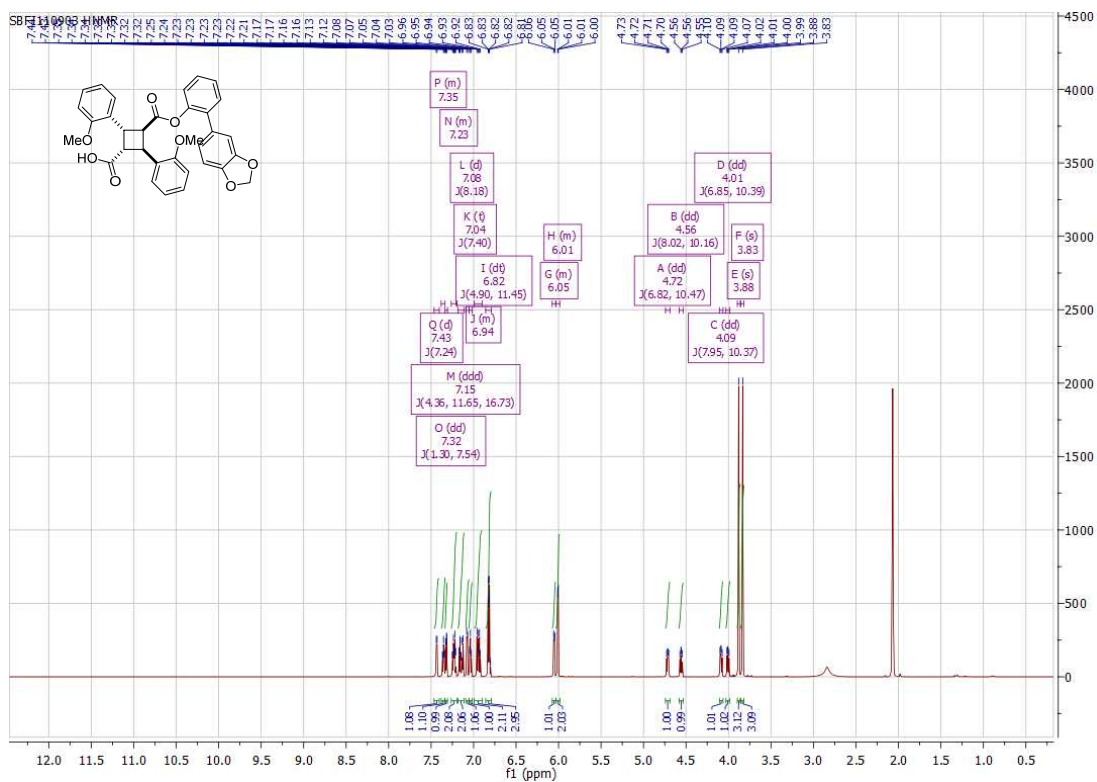

<sup>13</sup>C NMR of ***α*-18**

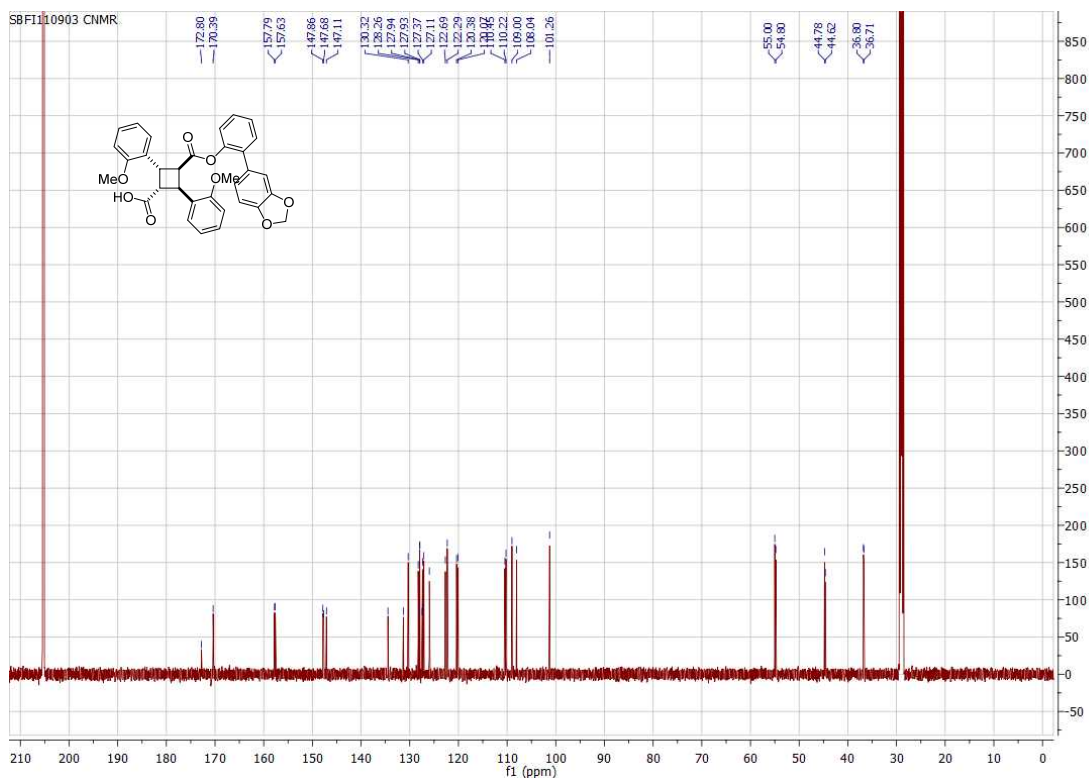



<sup>1</sup>H NMR of **a-19**

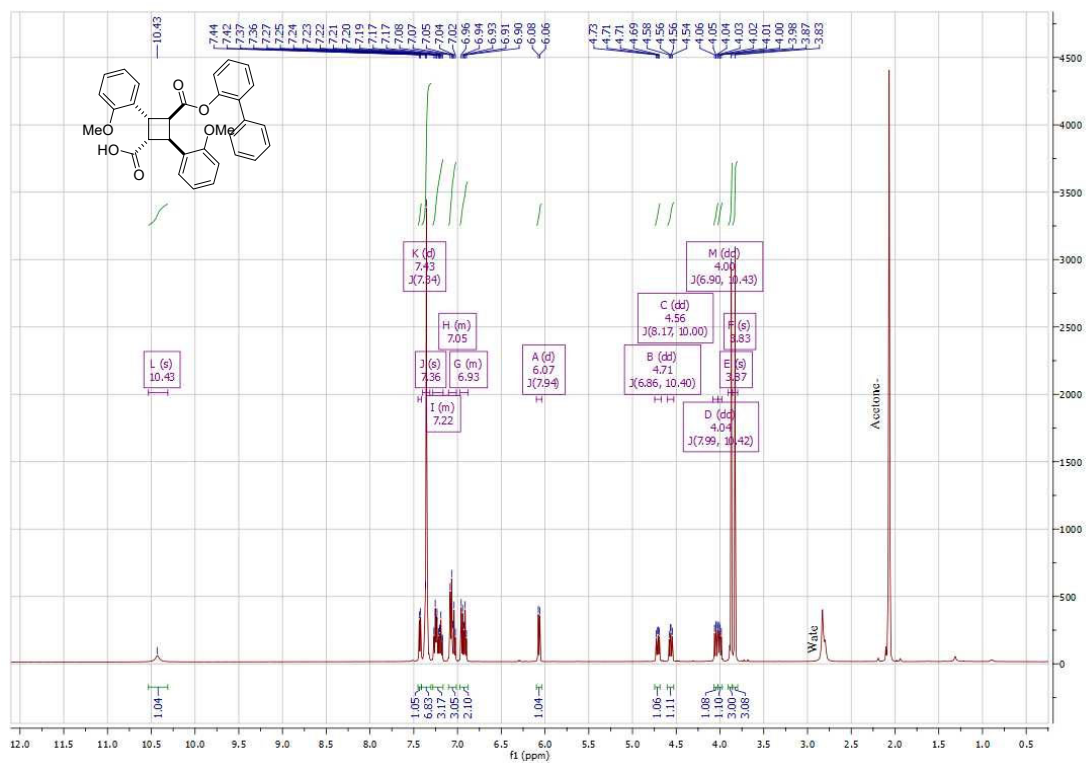

<sup>13</sup>C NMR of **a-19**

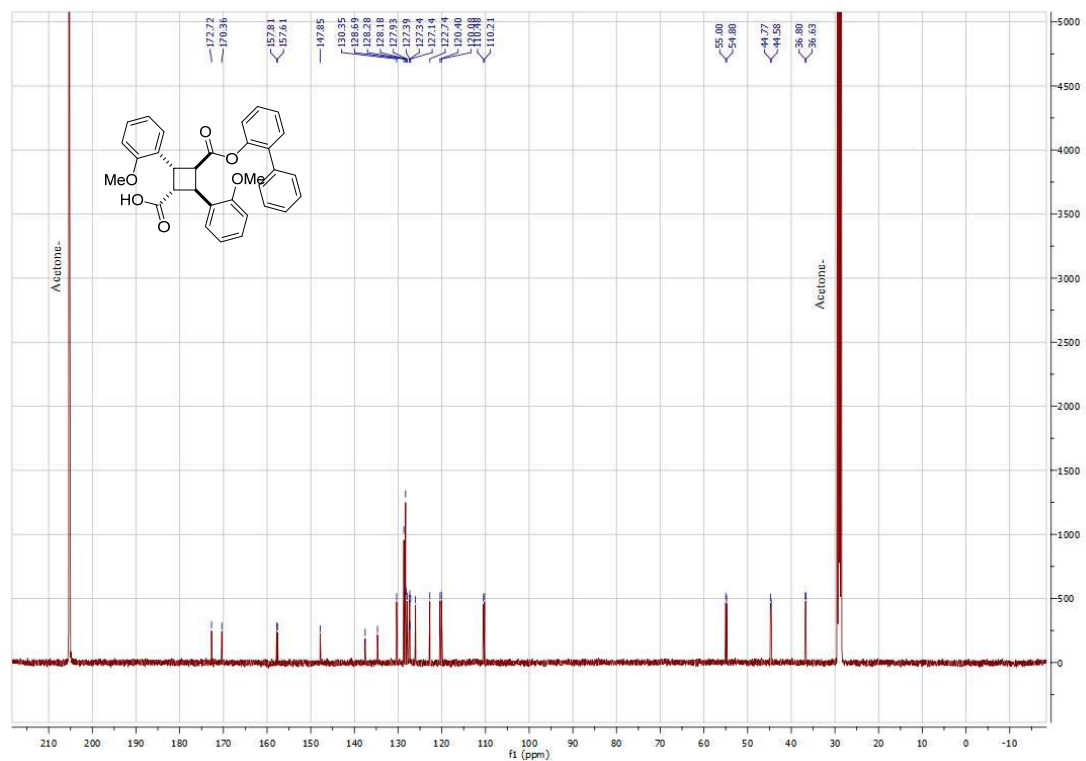

# <sup>1</sup>H NMR of $\alpha$ -20

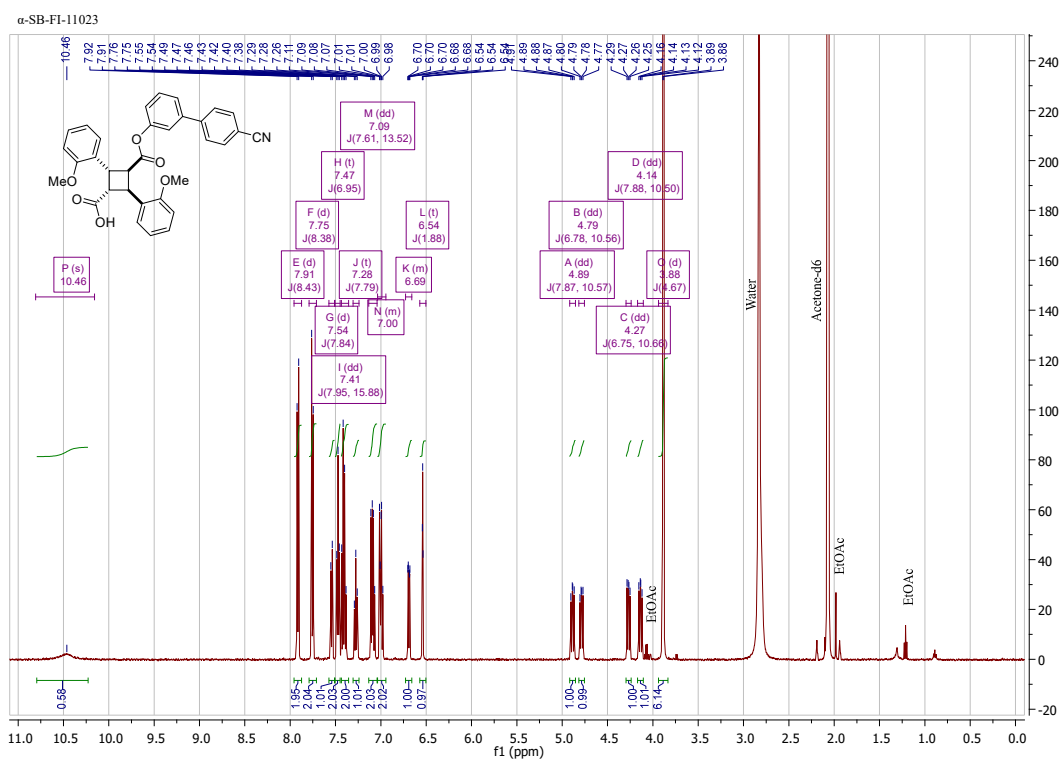

# <sup>13</sup>C NMR of $\alpha$ -20

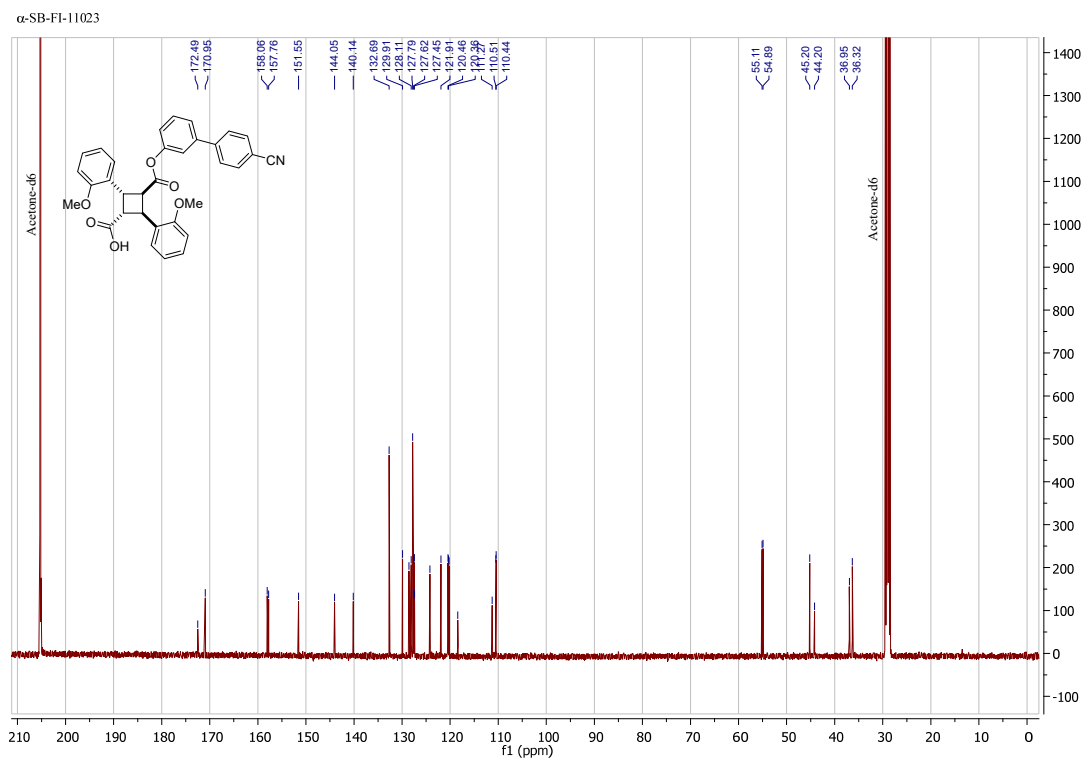

# <sup>1</sup>H NMR of $\alpha$ -21

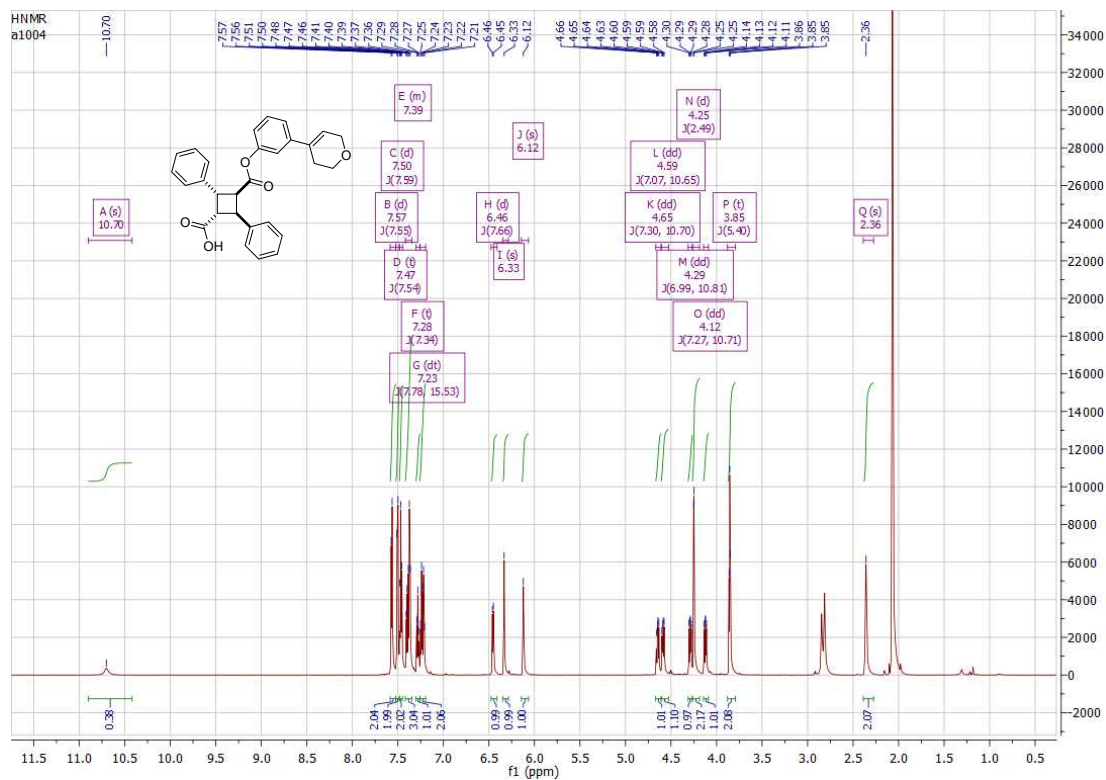

# <sup>13</sup>C NMR of $\alpha$ -21

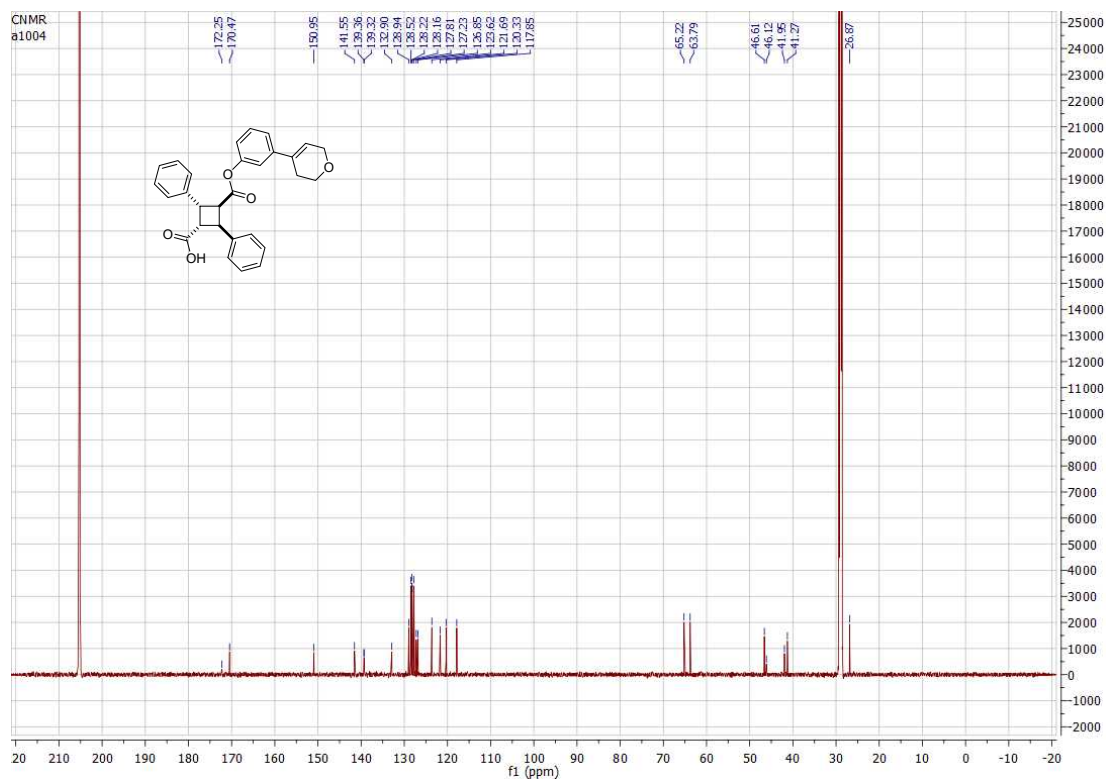

<sup>1</sup>H NMR of **α-22**

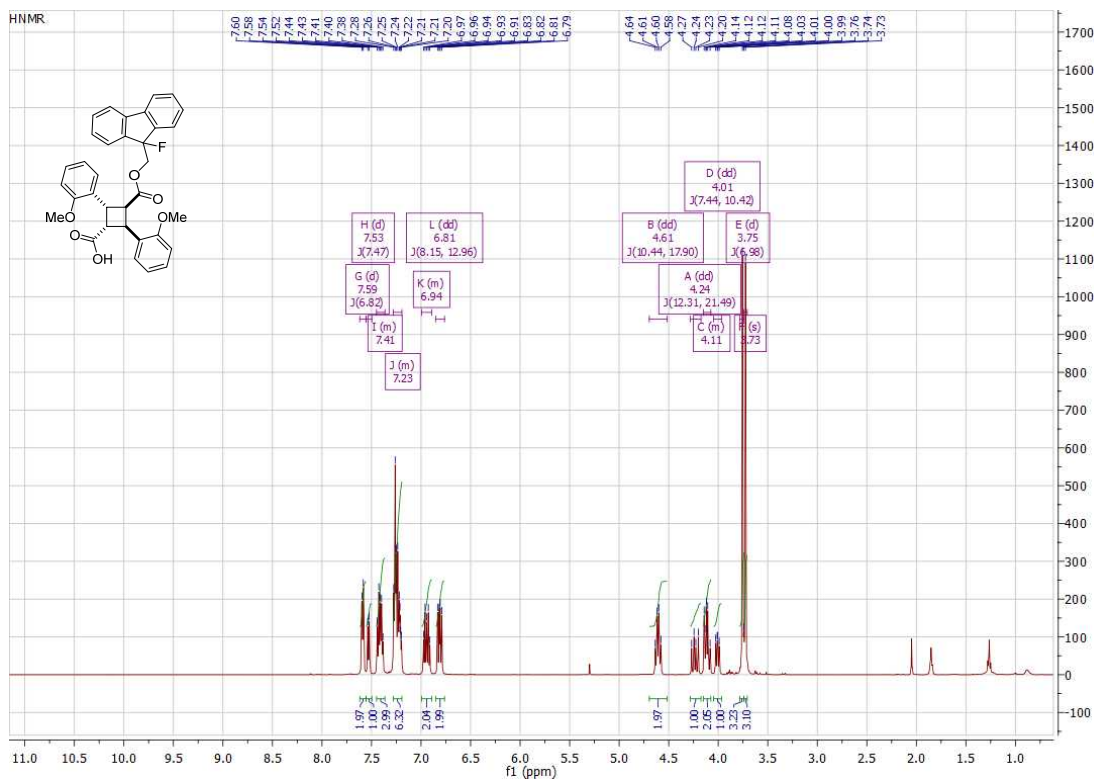

<sup>13</sup>C NMR of **α-22**

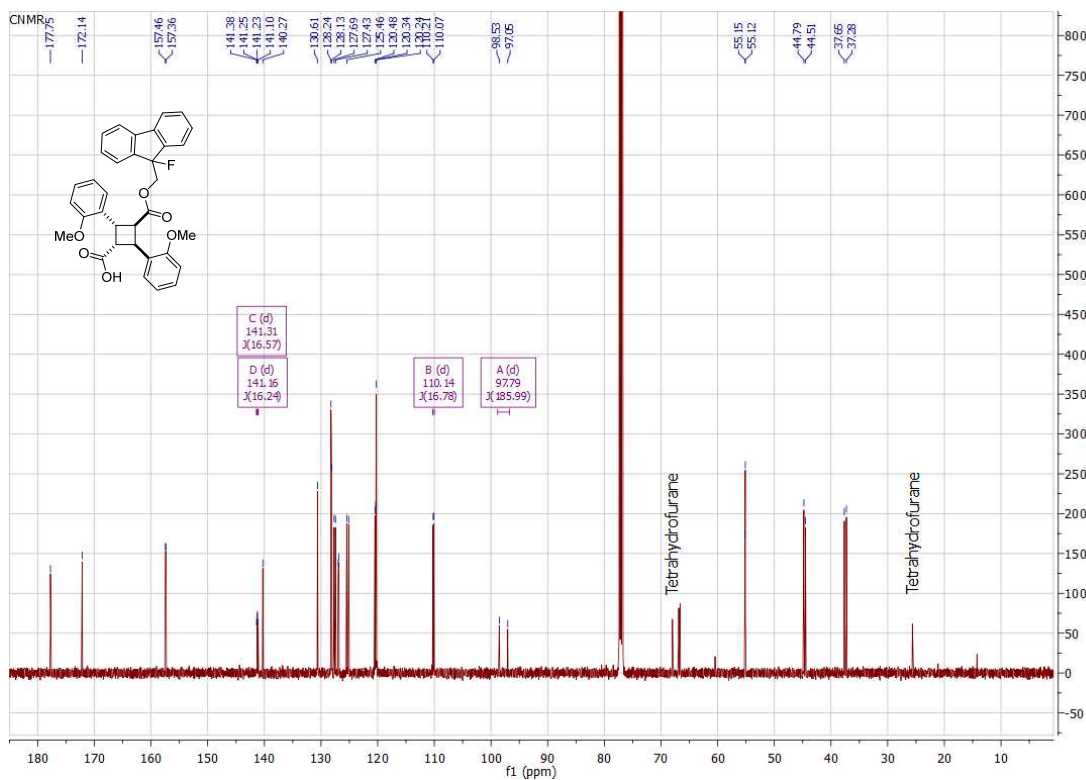

$^{19}\text{F}$ NMR of ***\alpha*-22**

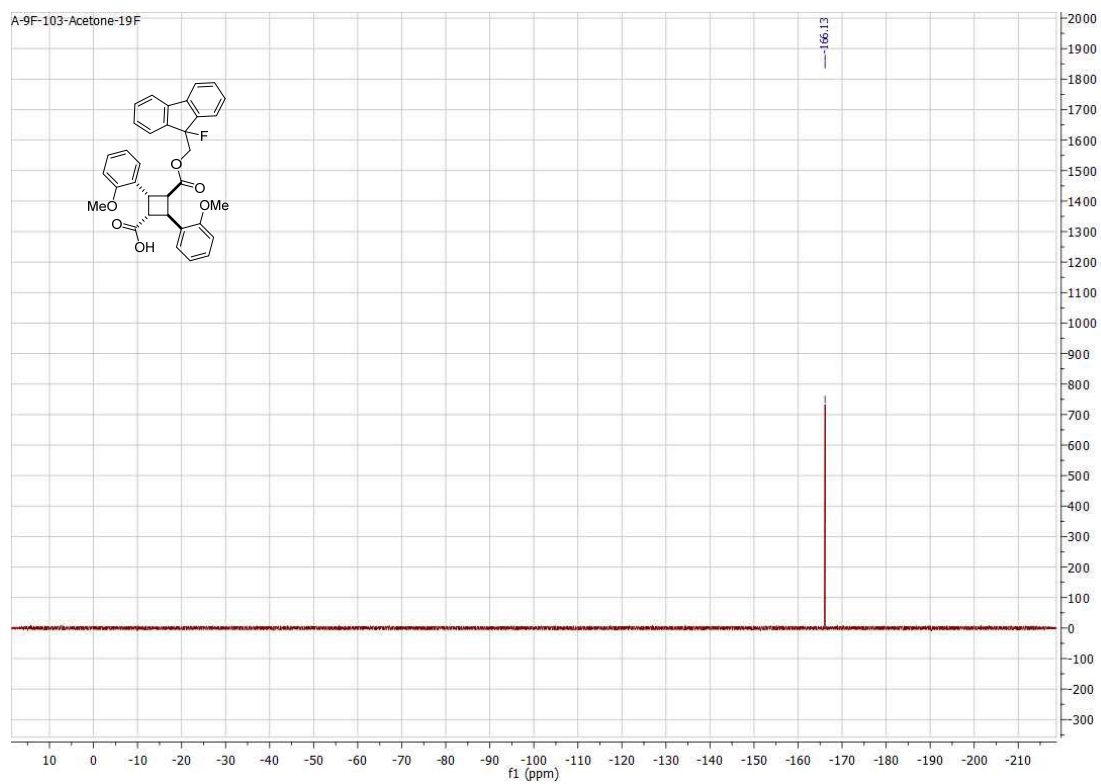

<sup>1</sup>H NMR of **α-23**

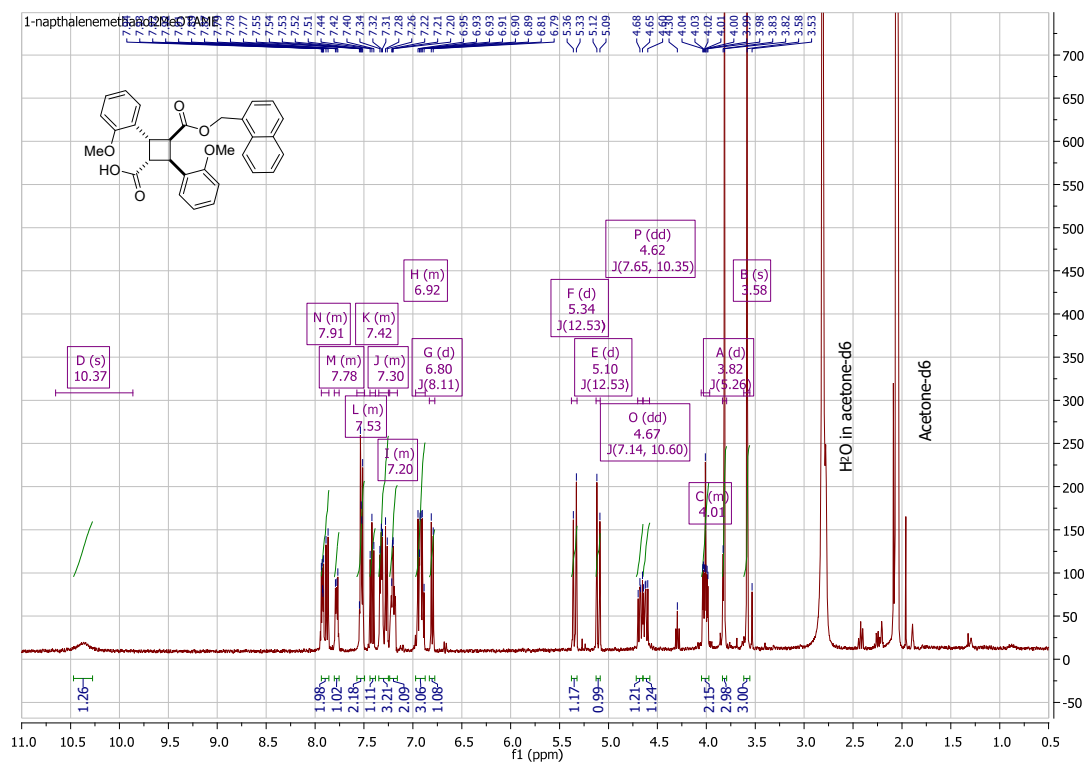

<sup>13</sup>C NMR of **α-23**

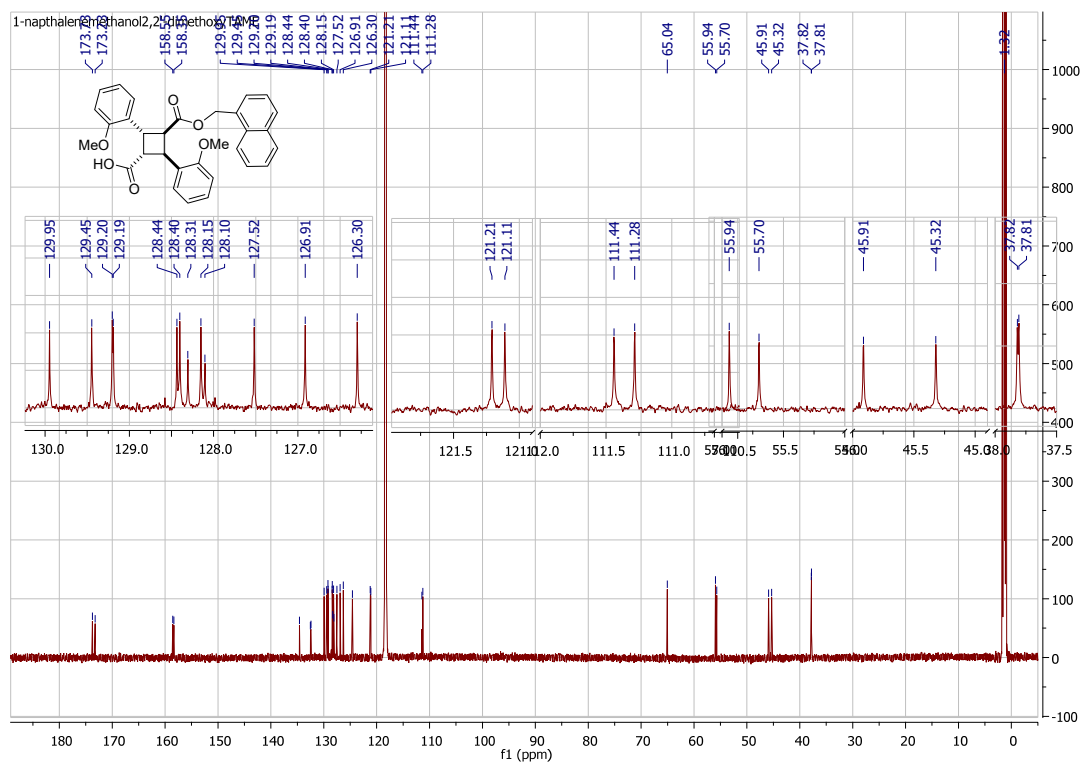

<sup>1</sup>H NMR of **α-24**

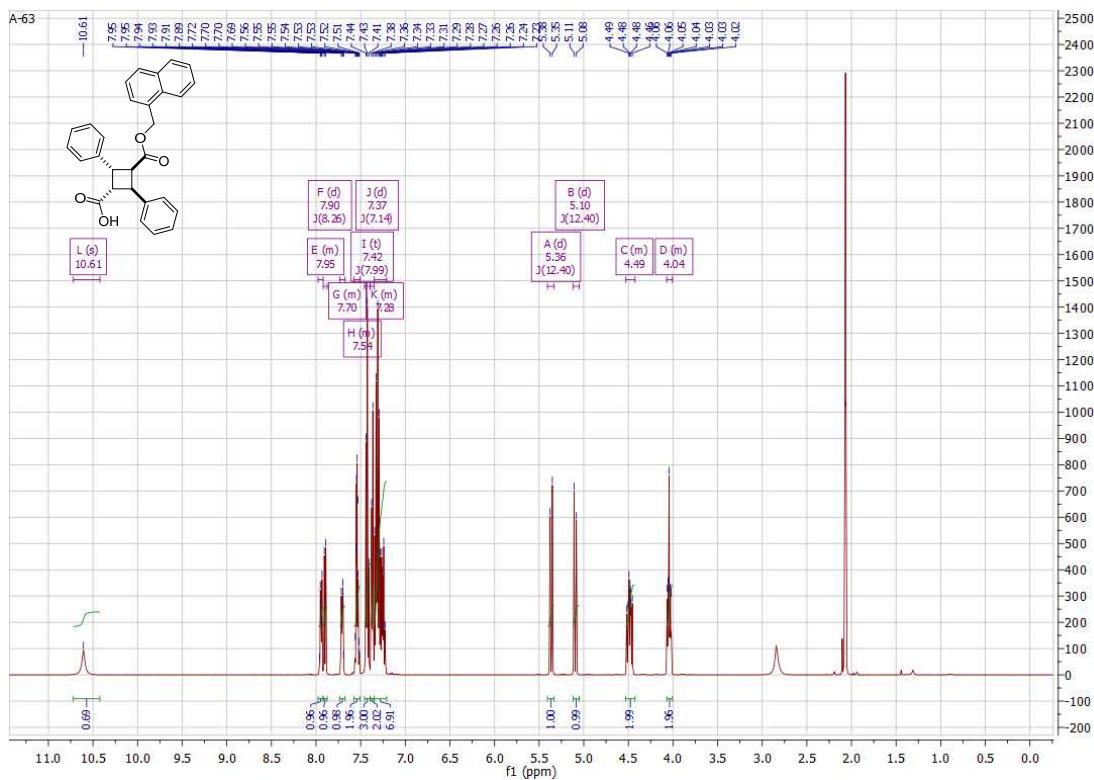

<sup>13</sup>C NMR of **α-24**

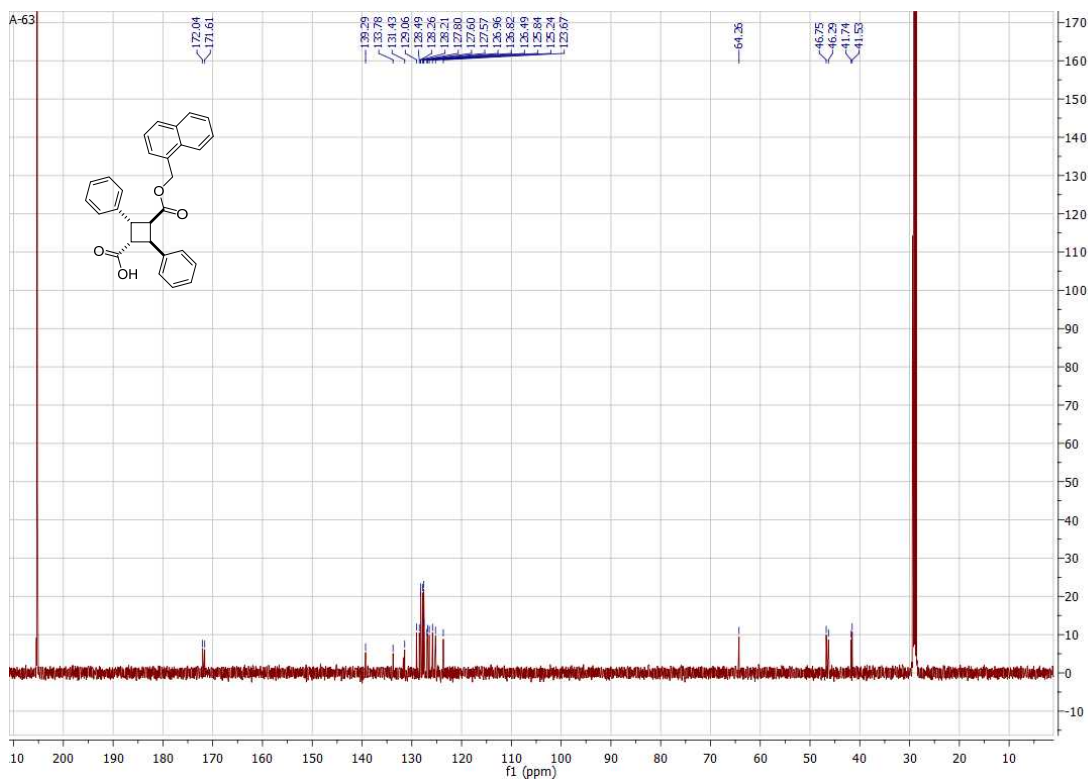

<sup>1</sup>H NMR of ***α*-25**

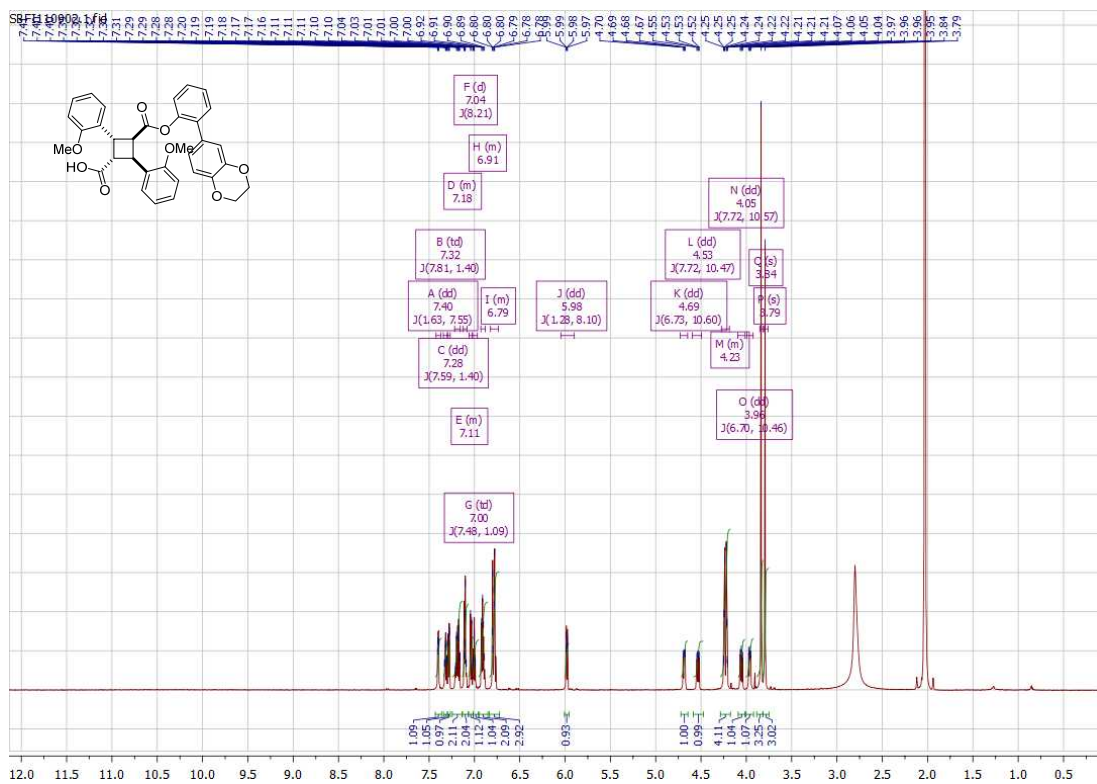

<sup>13</sup>C NMR of ***α*-25**

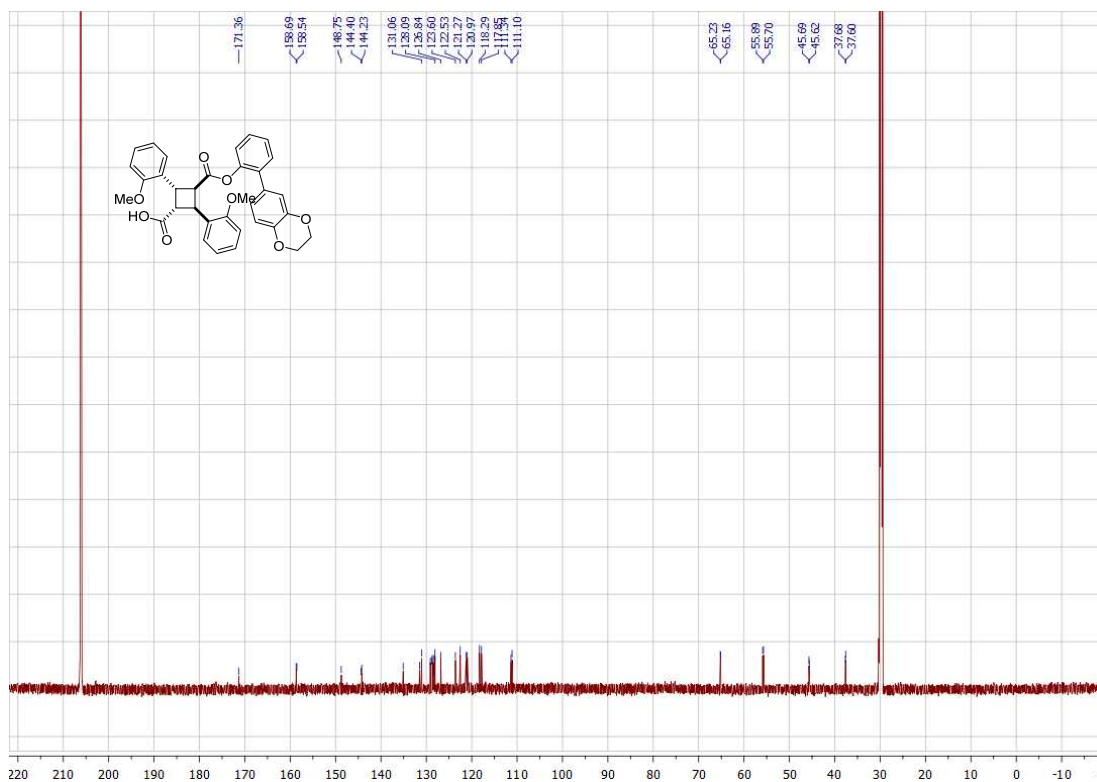



# <sup>1</sup>H NMR of ***α*-26**

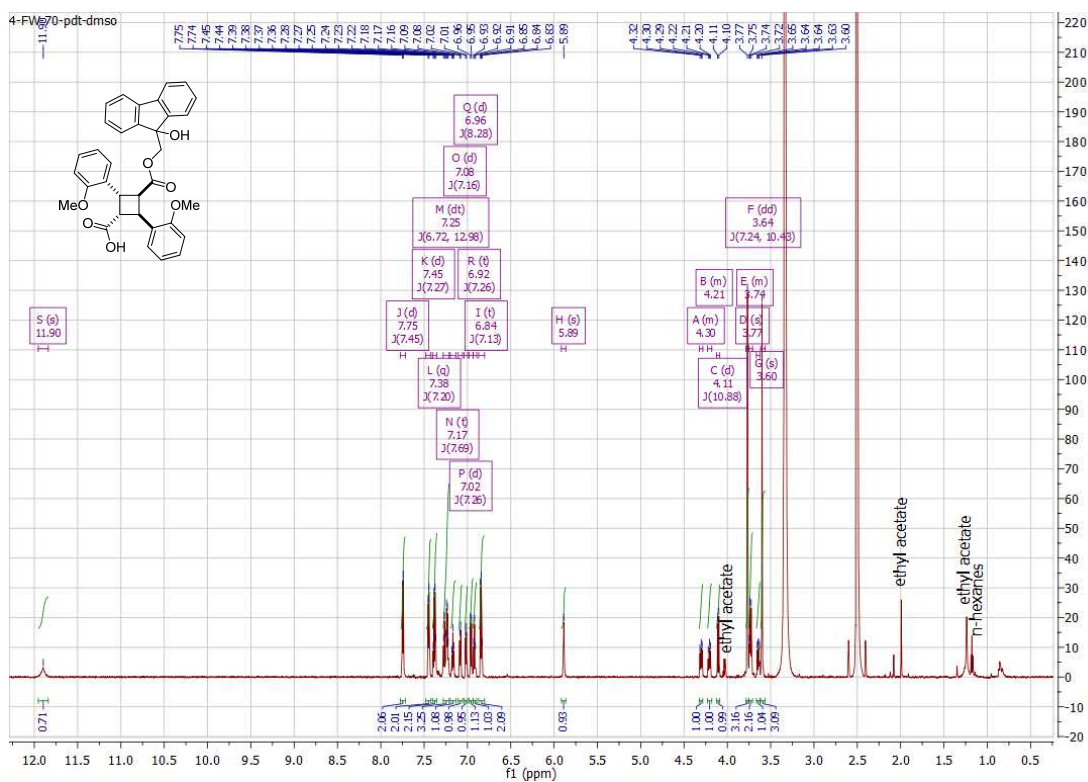

# <sup>13</sup>C NMR of ***α*-26**

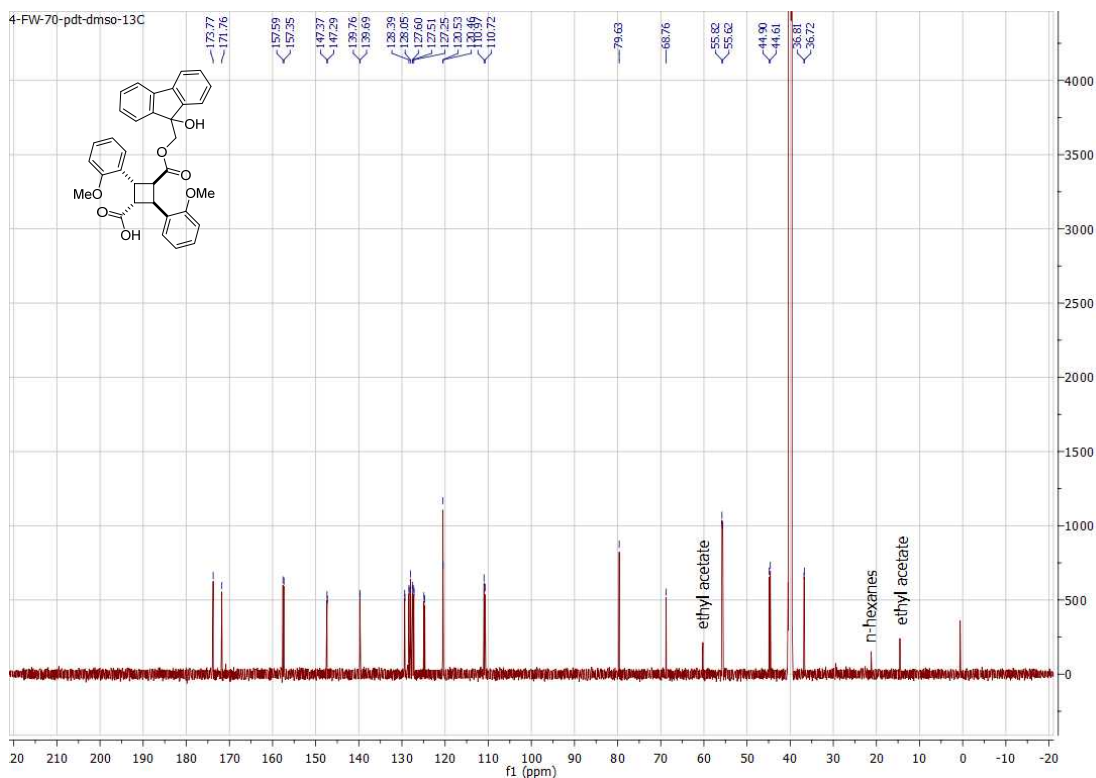

<sup>1</sup>H NMR of  $\gamma$ -1

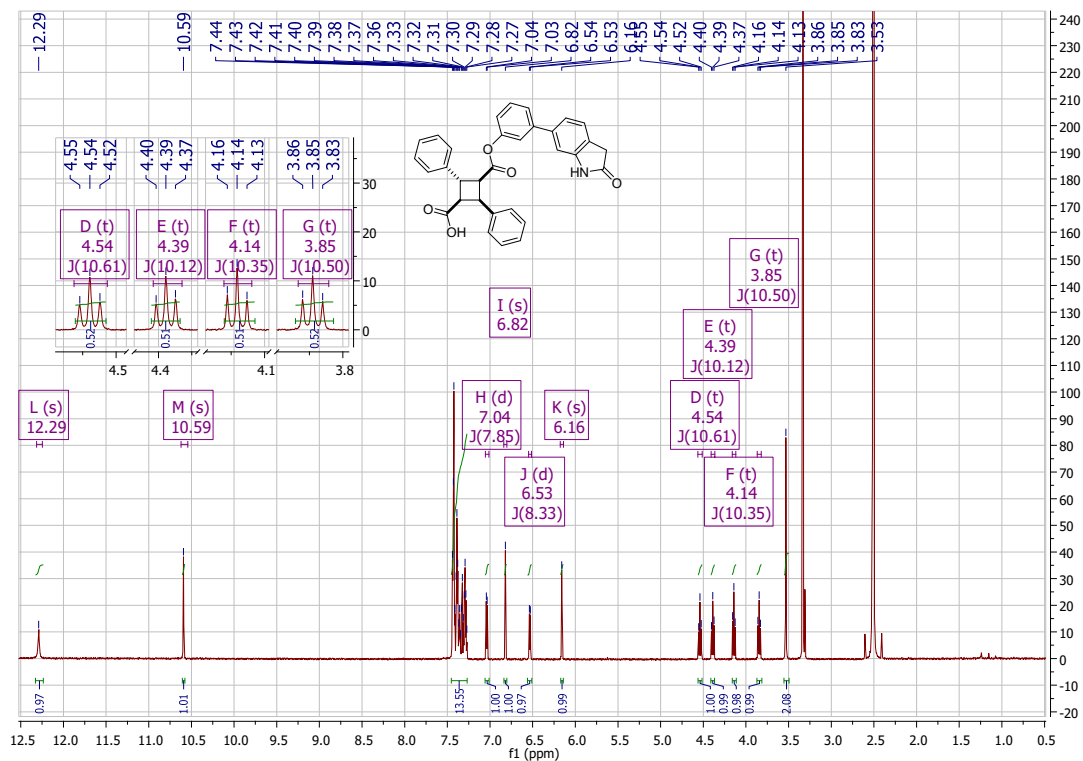

<sup>13</sup>C NMR of  $\gamma$ -1

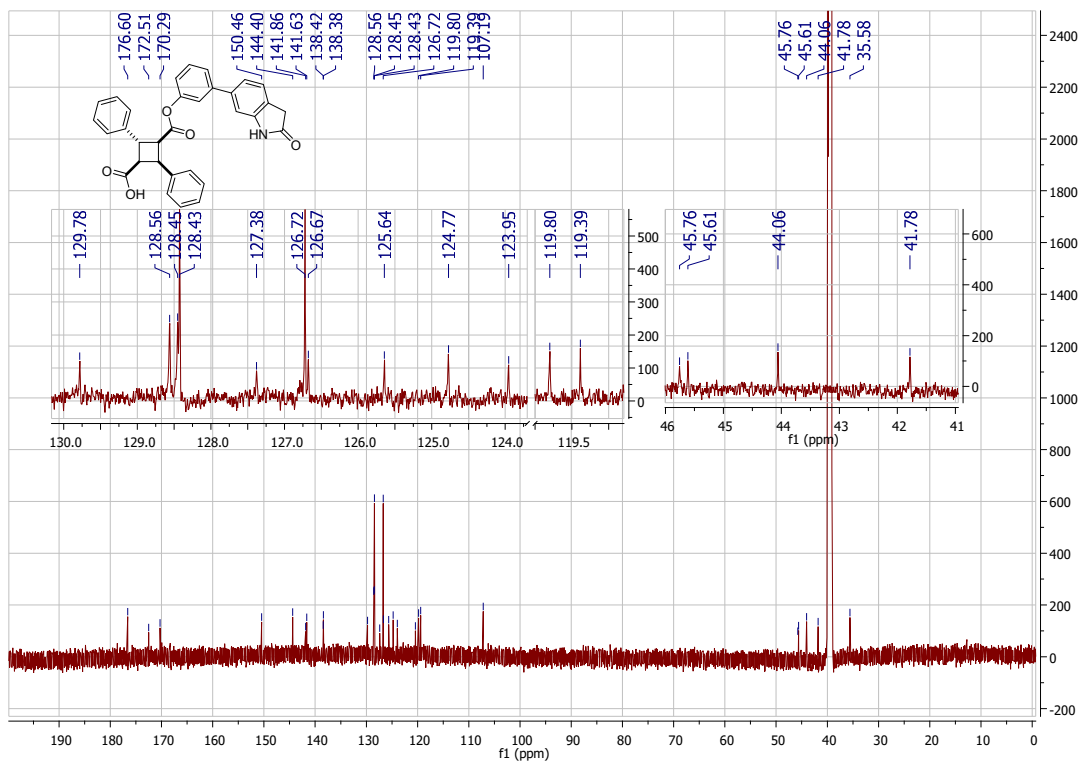

# <sup>1</sup>H NMR of $\gamma$ -3

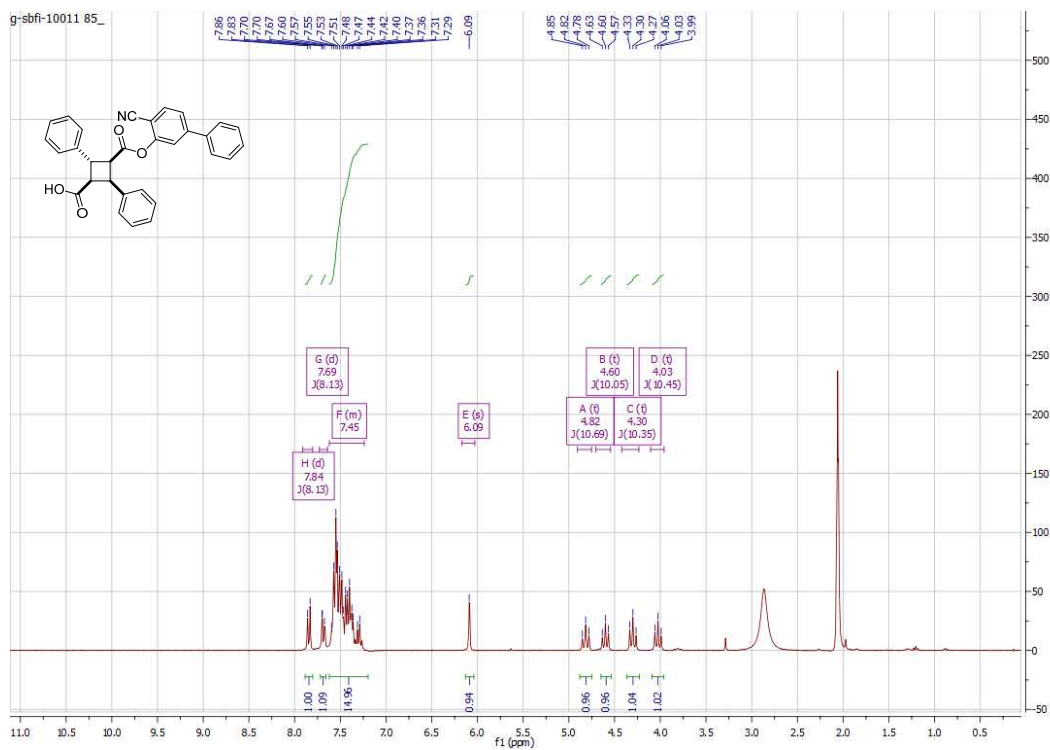

# <sup>13</sup>C NMR of $\gamma$ -3

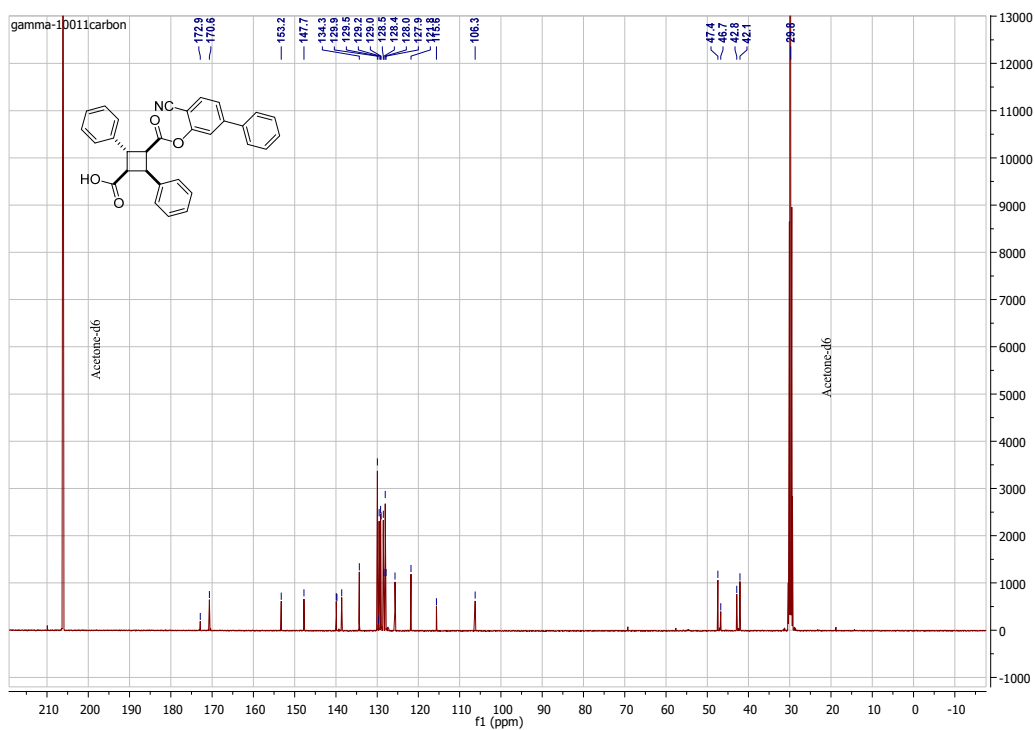

# <sup>1</sup>H NMR of $\gamma$ -6

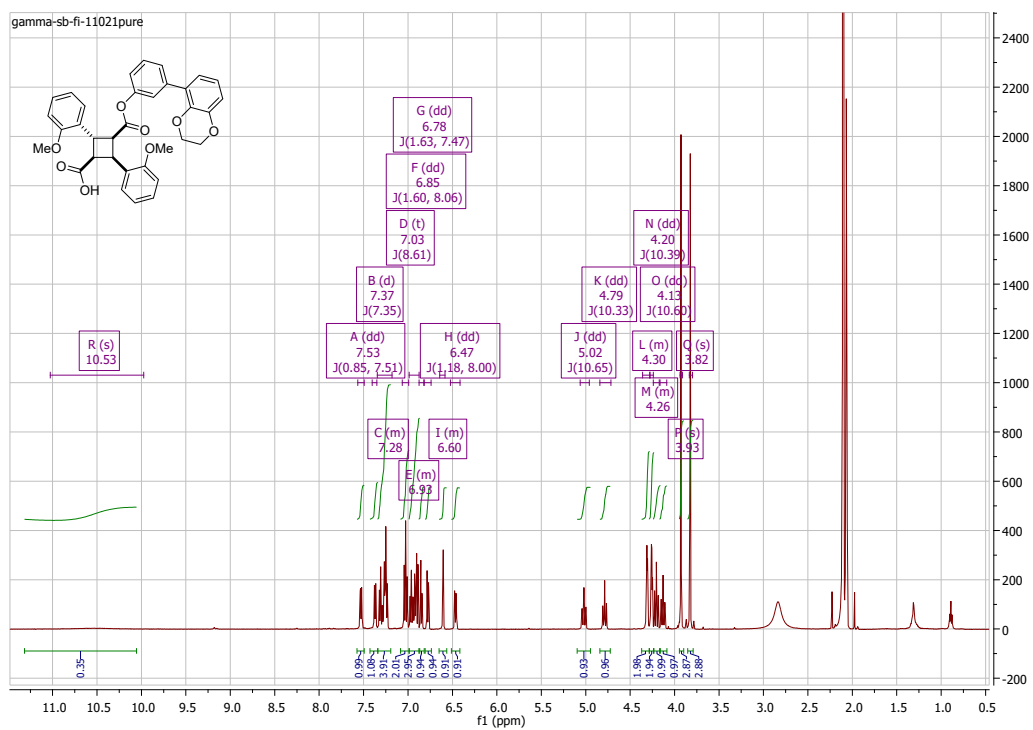

# <sup>13</sup>C NMR of $\gamma$ -6

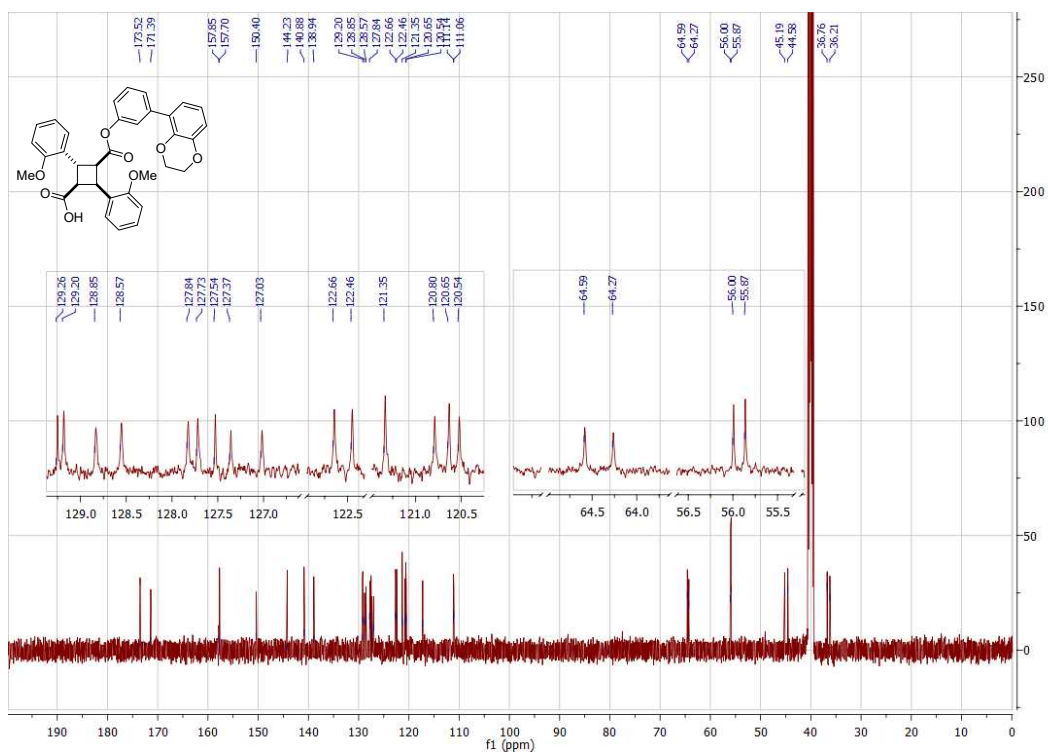

<sup>1</sup>H NMR of  $\gamma$ -8

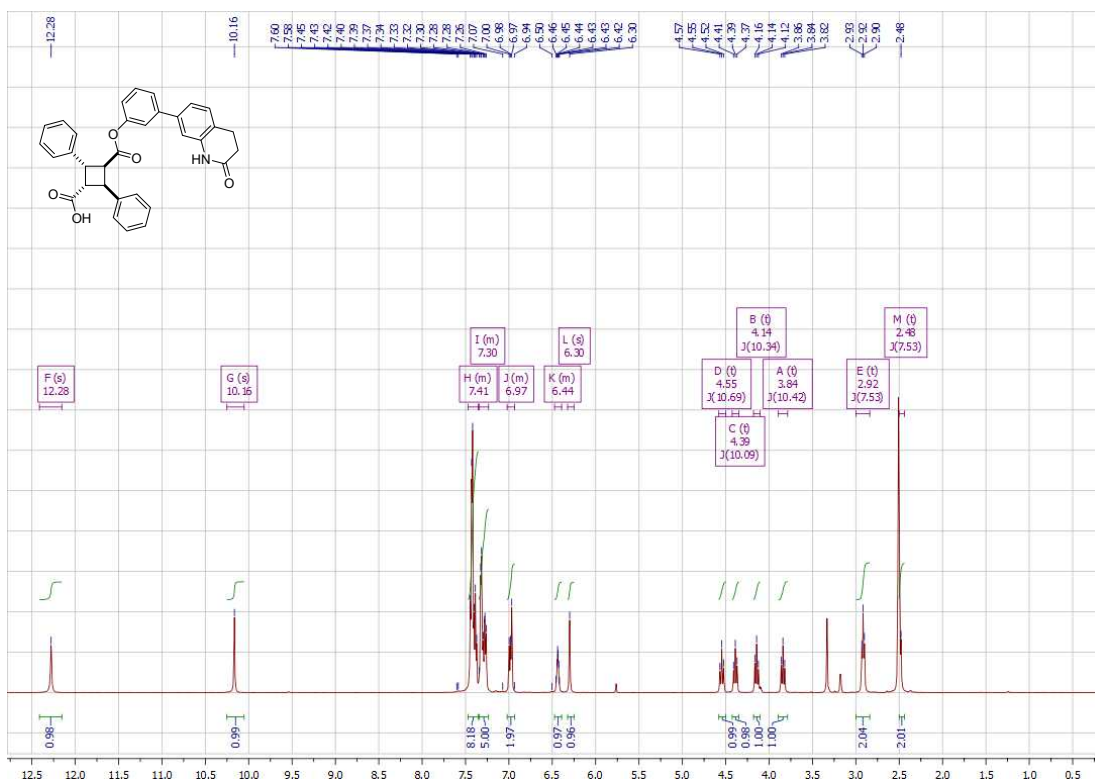

<sup>13</sup>C NMR of  $\gamma$ -8

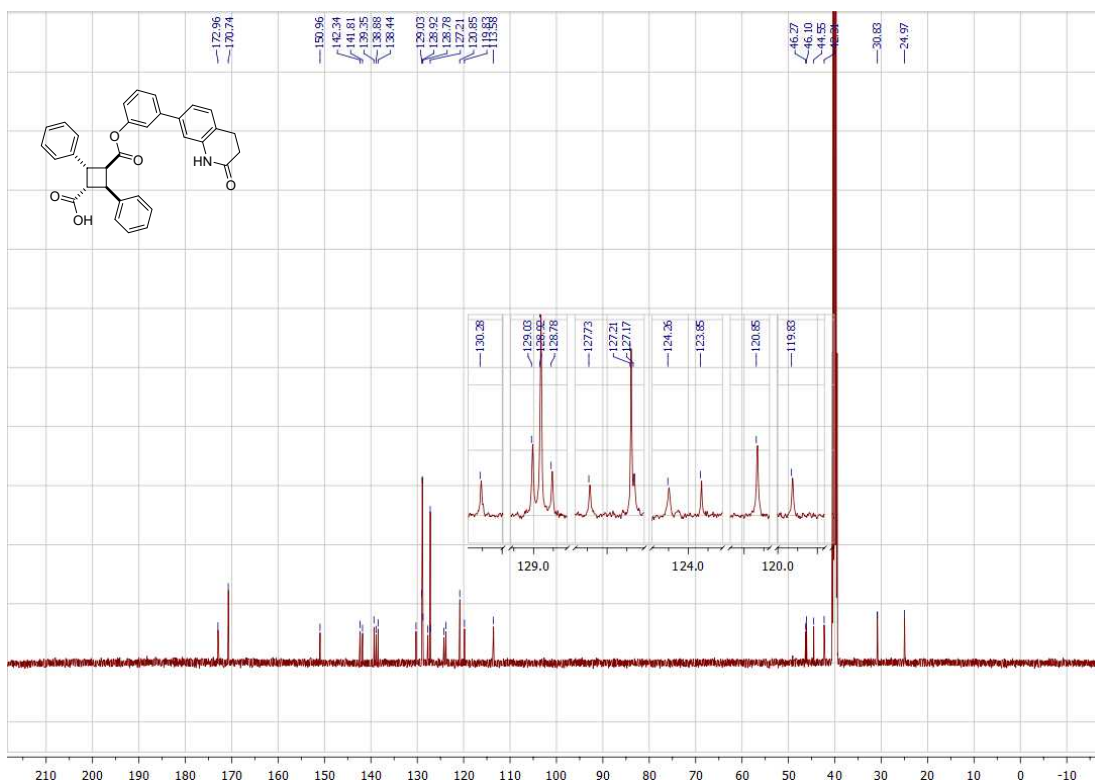

<sup>1</sup>H NMR of  $\gamma$ -9

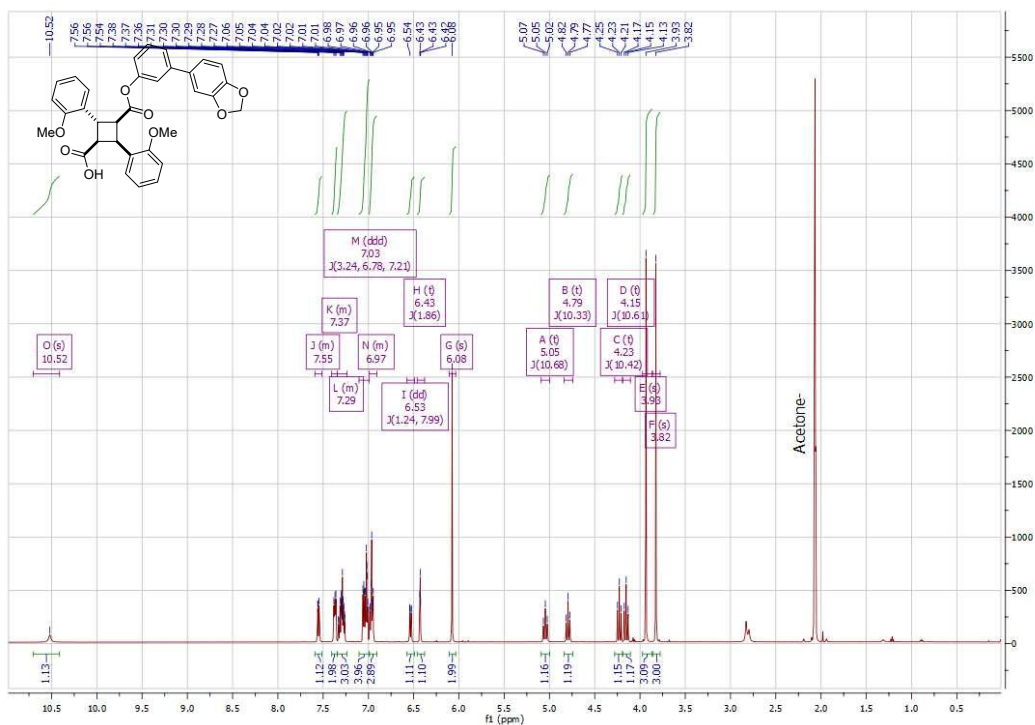

<sup>13</sup>C NMR of  $\gamma$ -9

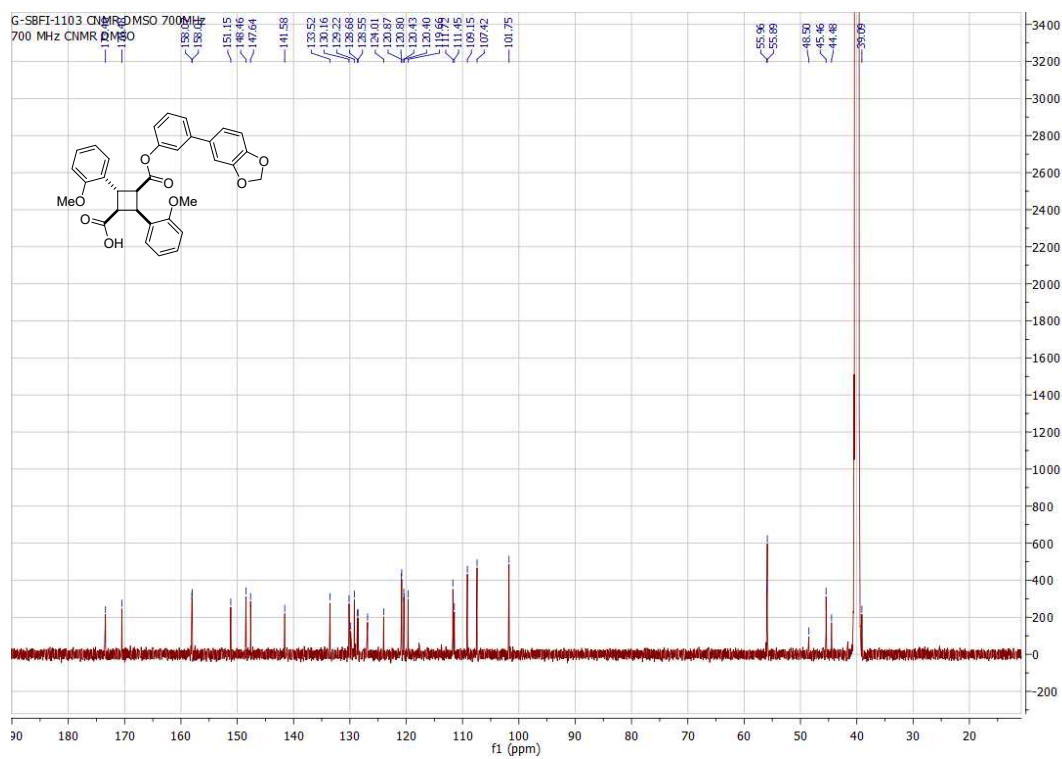

# <sup>1</sup>H NMR of $\gamma$ -10

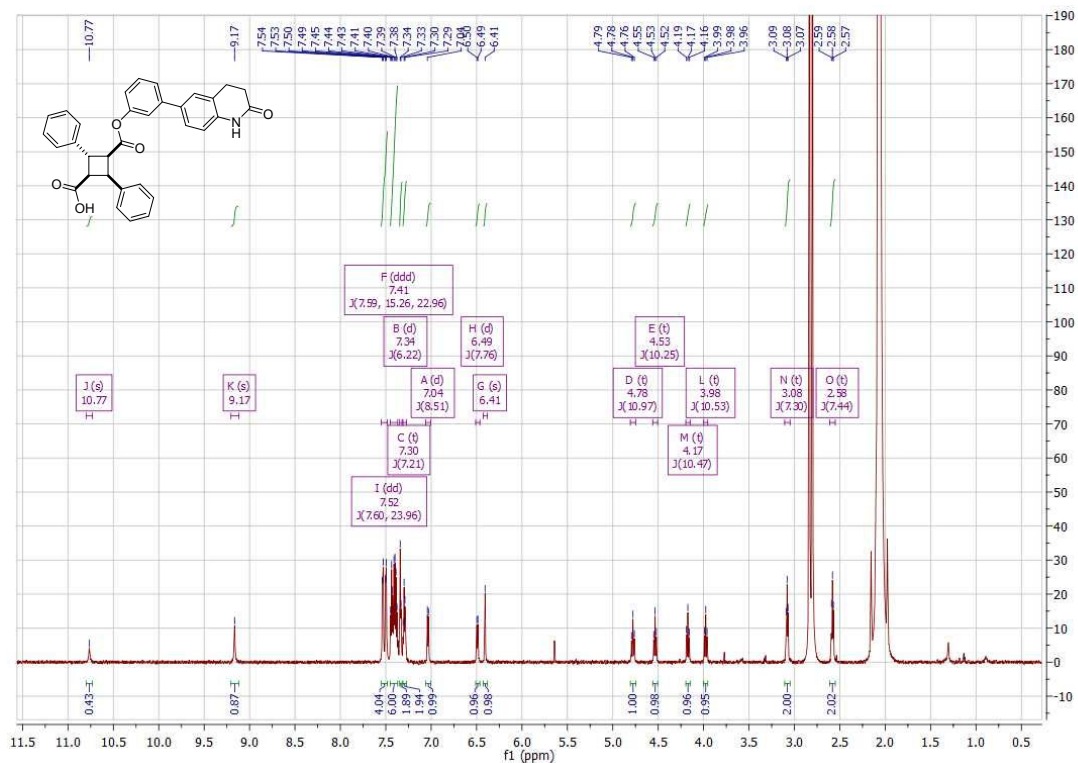

# <sup>13</sup>C NMR of $\gamma$ -10

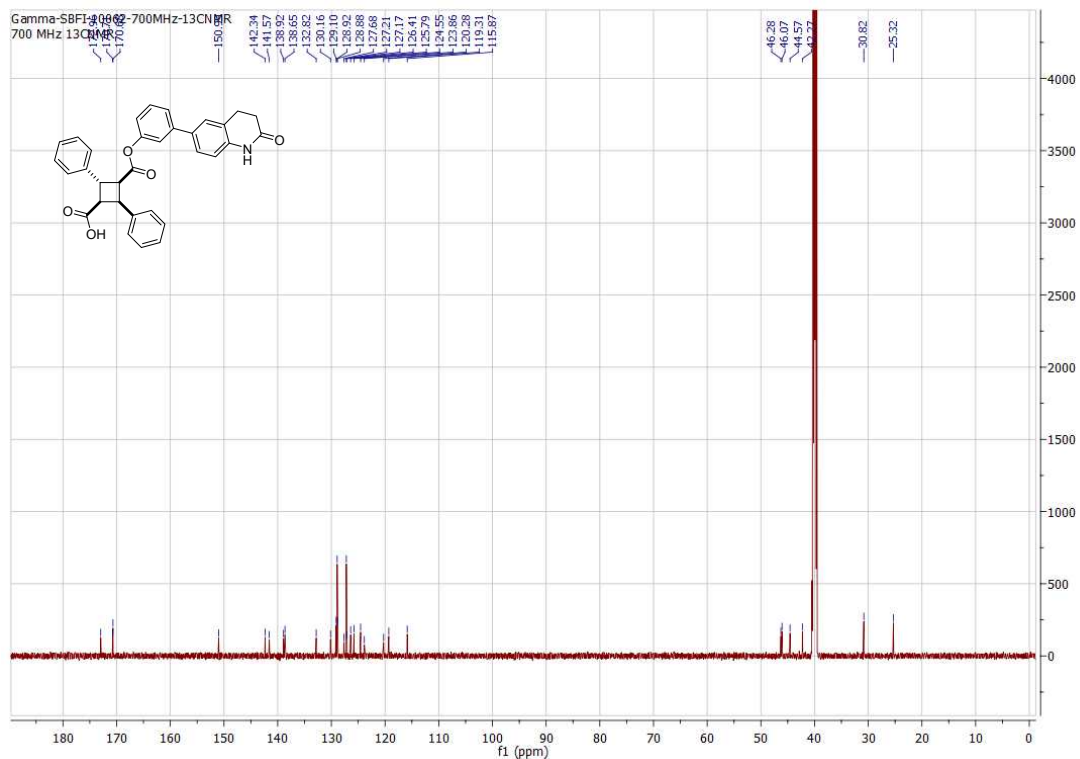

# <sup>1</sup>H NMR of $\gamma$ -12

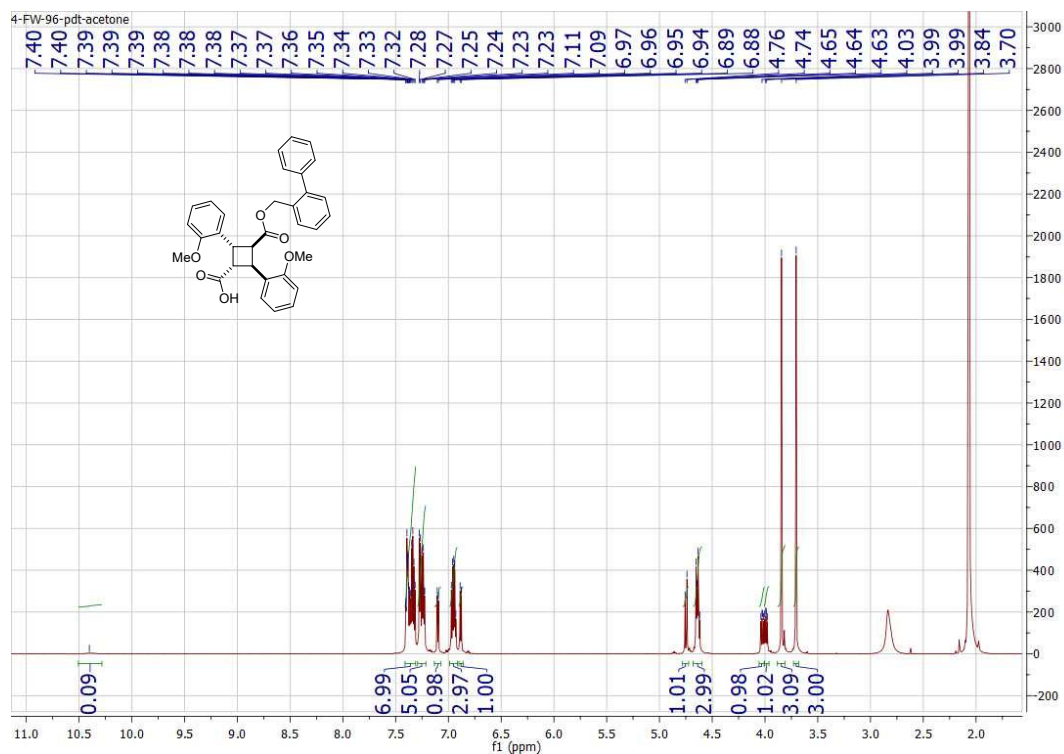

# <sup>13</sup>C NMR of $\gamma$ -12

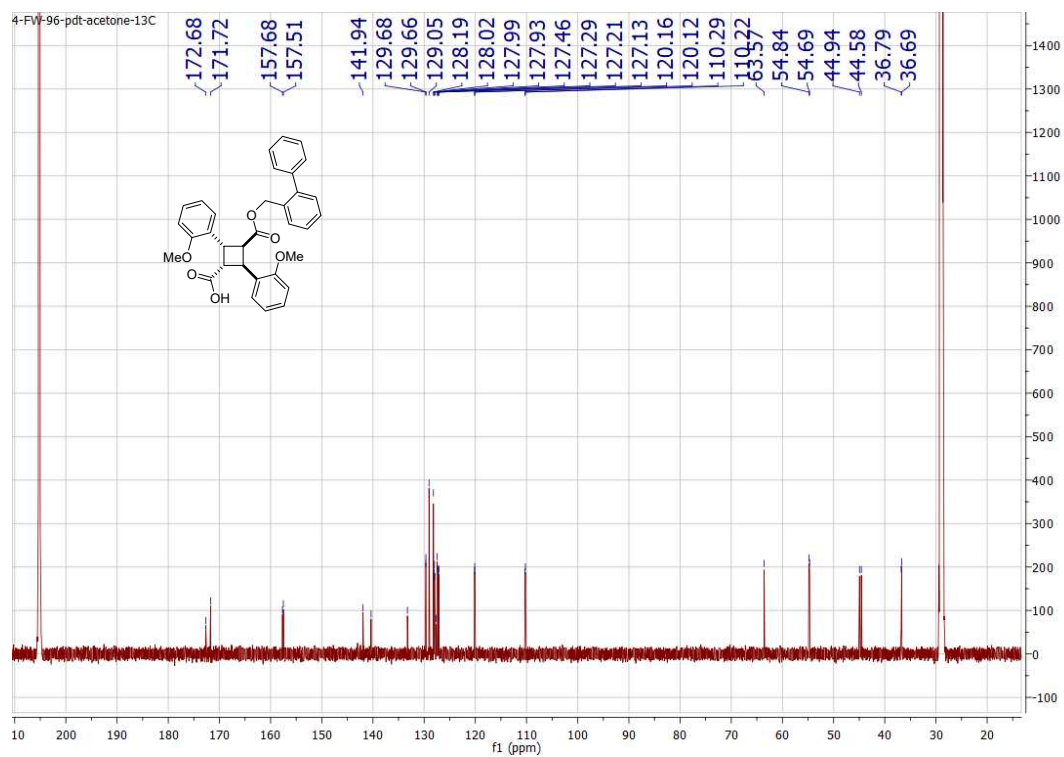



# <sup>1</sup>H NMR of $\gamma$ -13

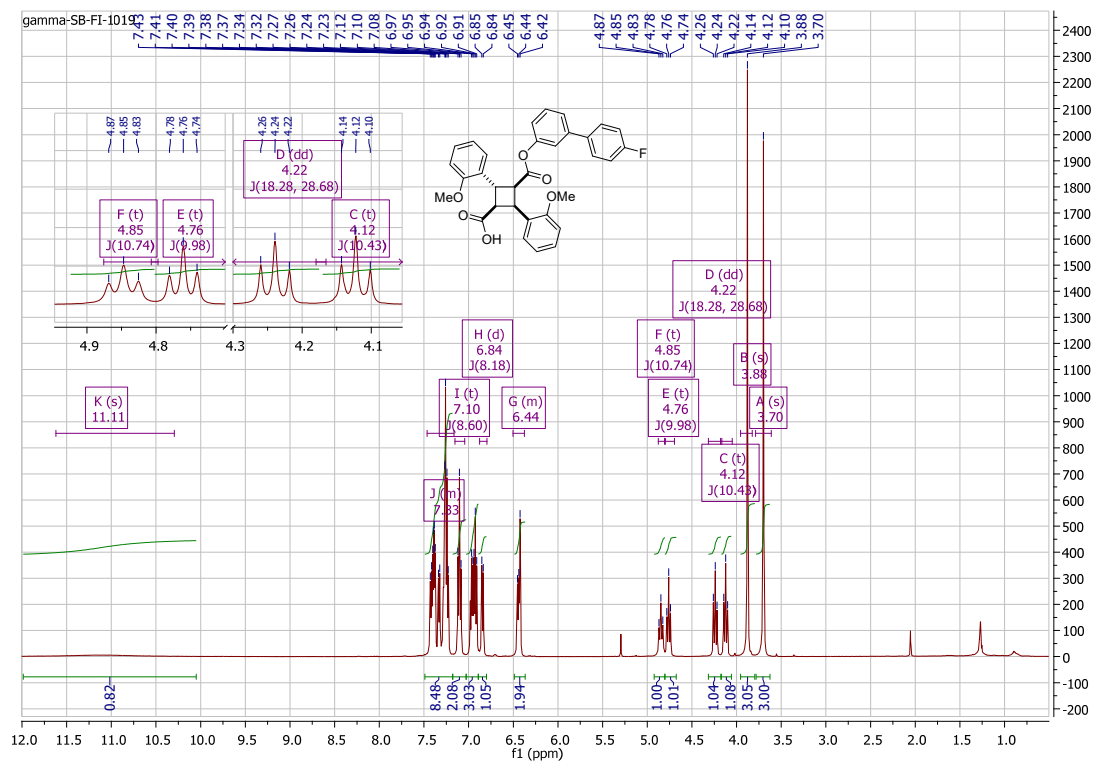

# <sup>13</sup>C NMR of $\gamma$ -13

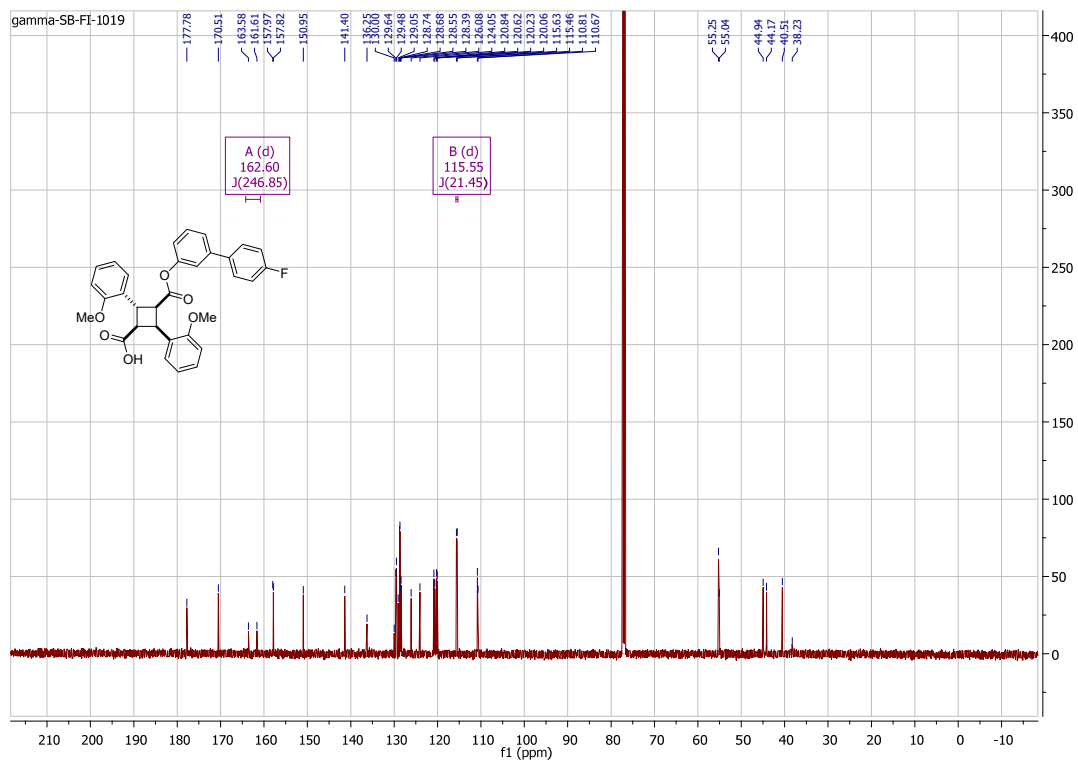

# $^{19}\text{F}$ NMR of $\gamma$ -13

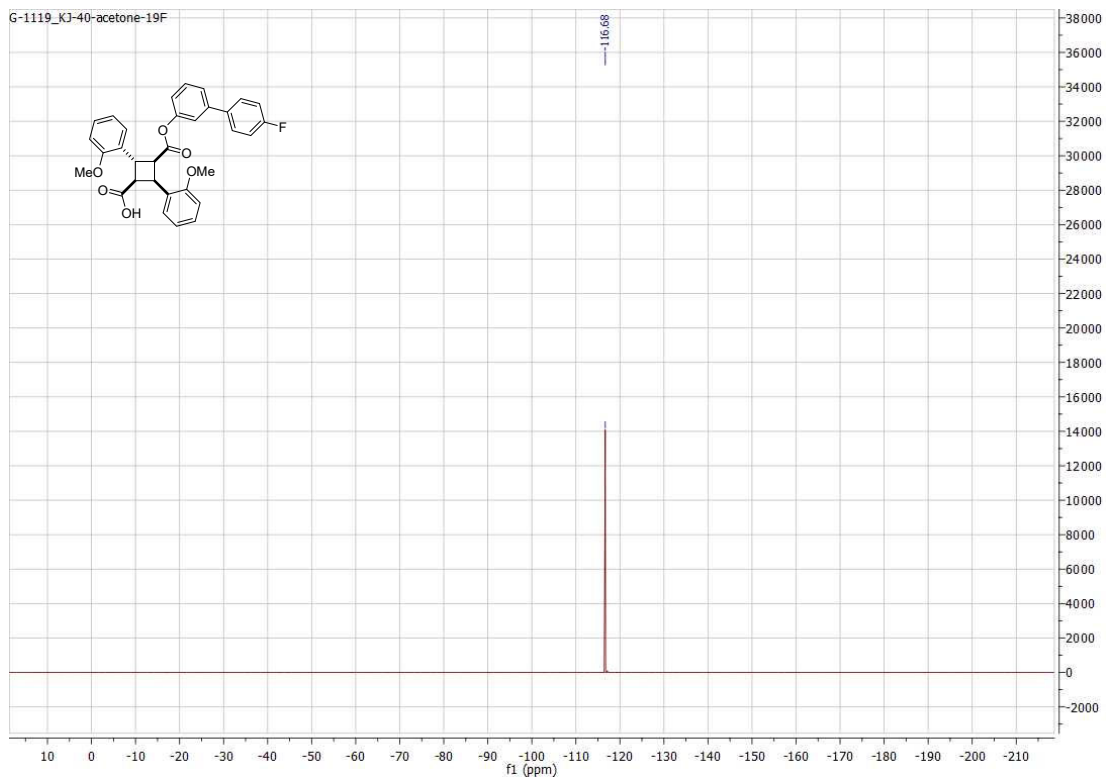

# <sup>1</sup>H NMR of $\gamma$ -14

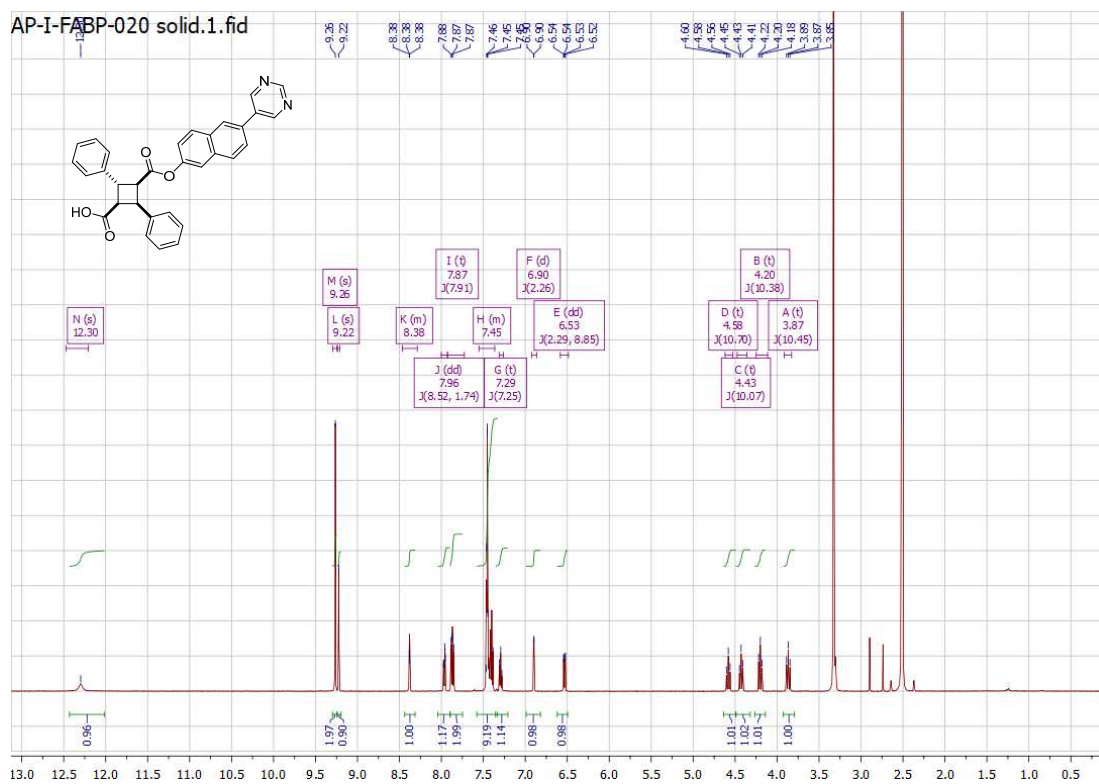

# <sup>13</sup>C NMR of $\gamma$ -14

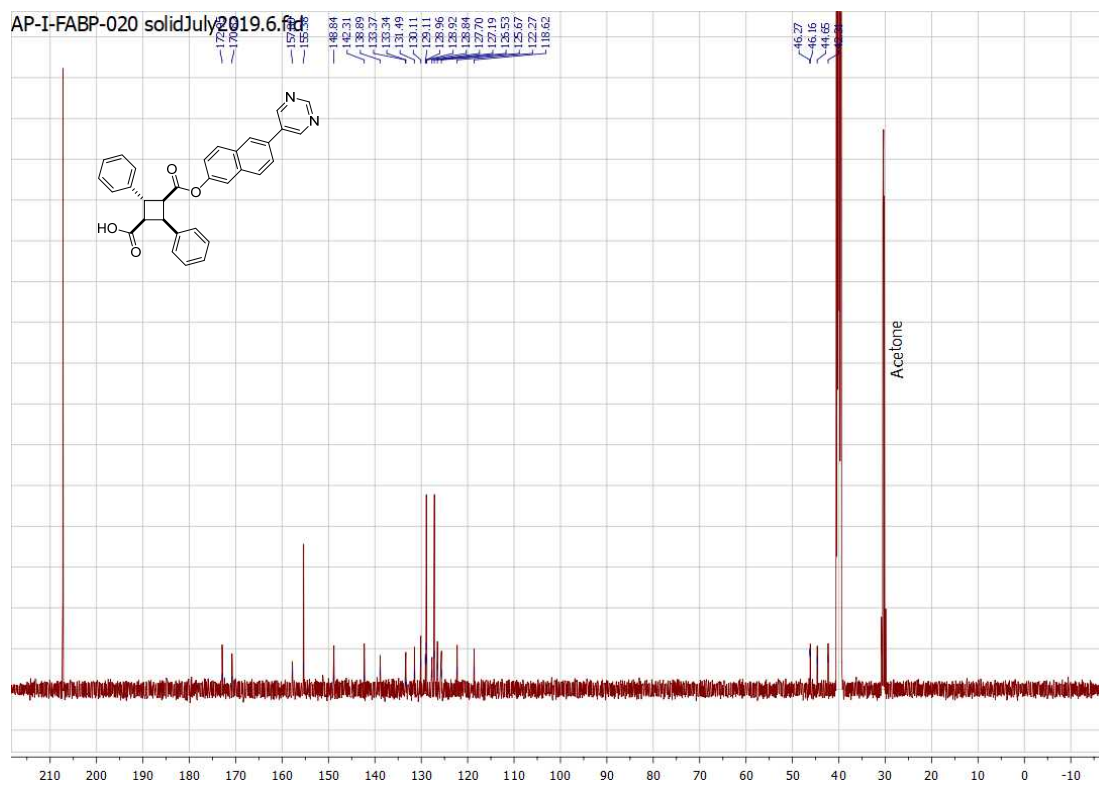

<sup>1</sup>H NMR of  $\gamma$ -15

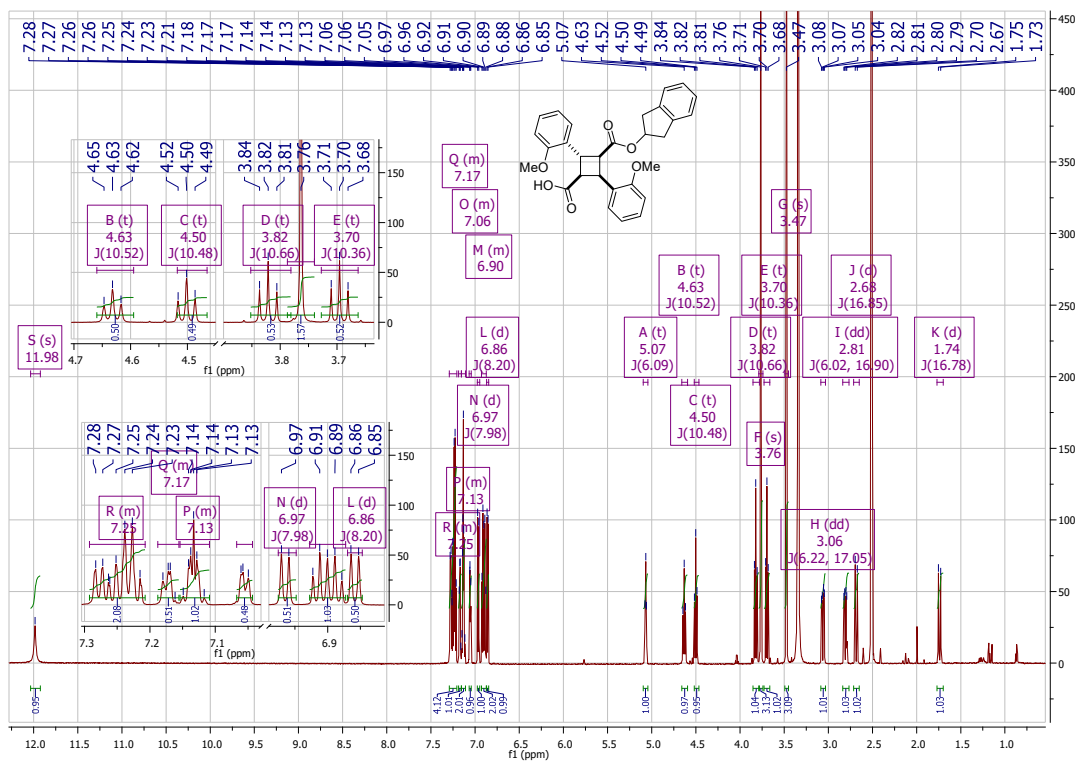

<sup>13</sup>C NMR of  $\gamma$ -15

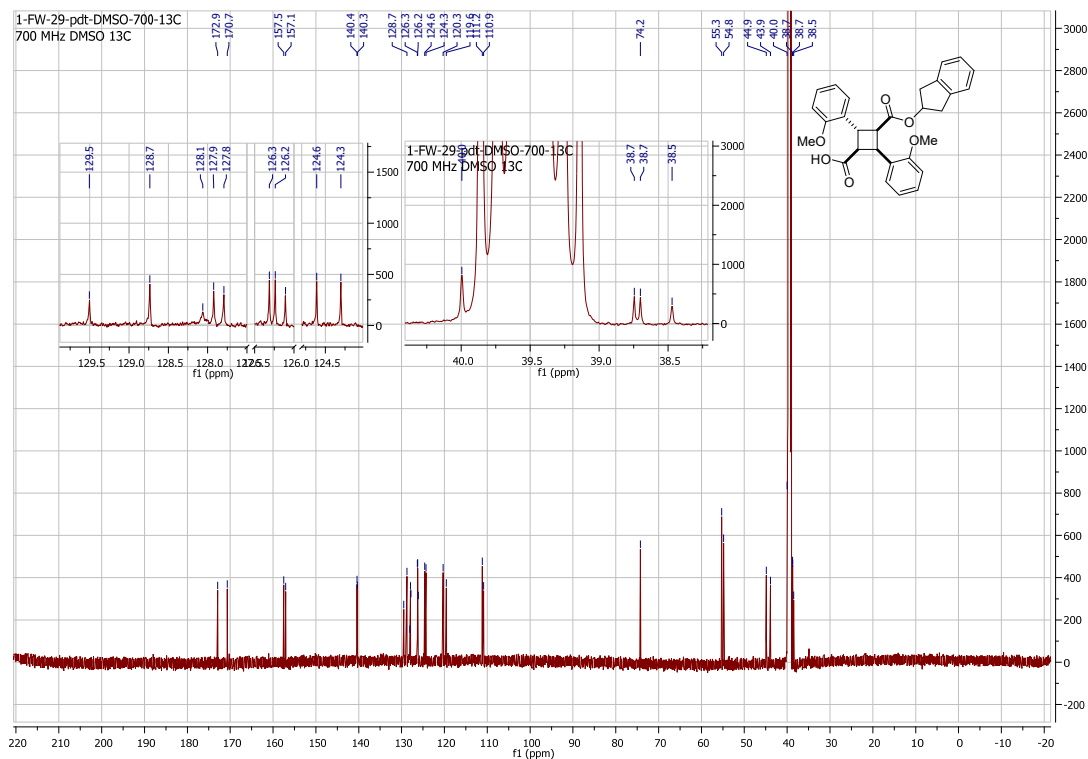

<sup>1</sup>H NMR of  $\gamma$ -16

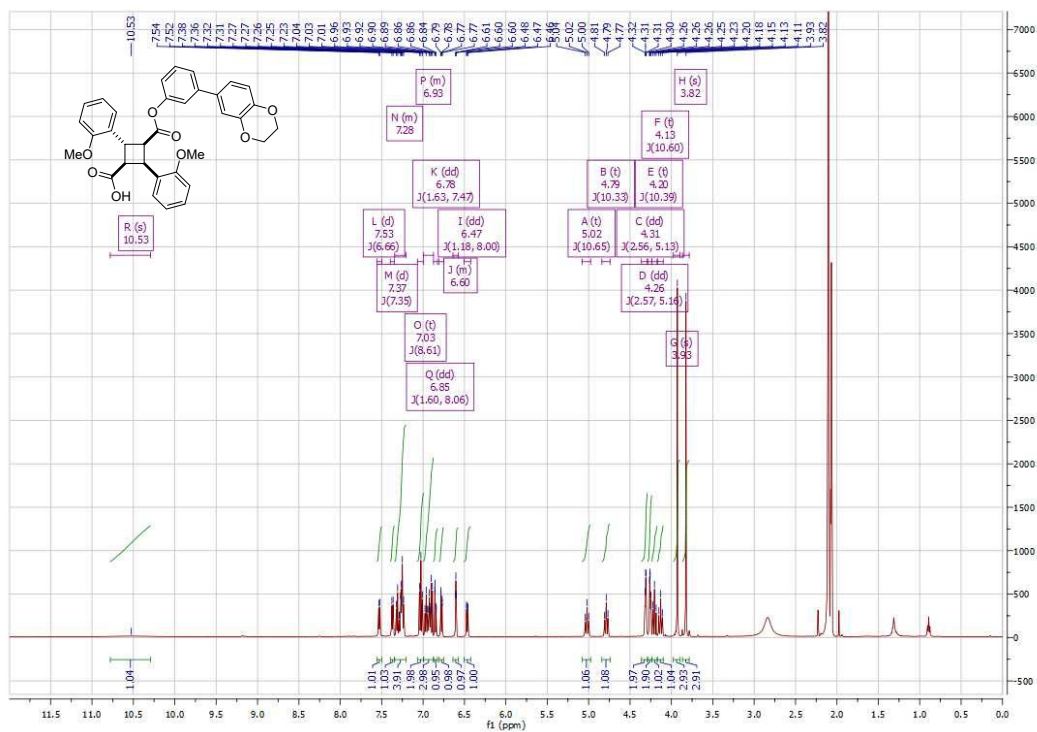

<sup>13</sup>C NMR of  $\gamma$ -16

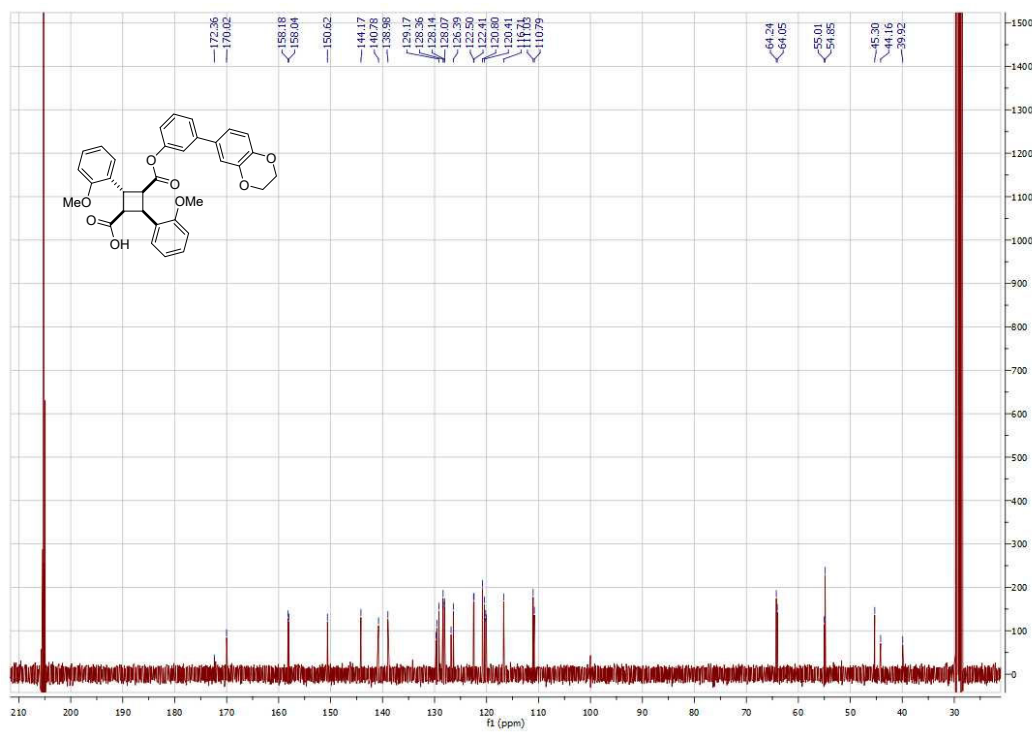

<sup>1</sup>H NMR of  $\gamma$ -19

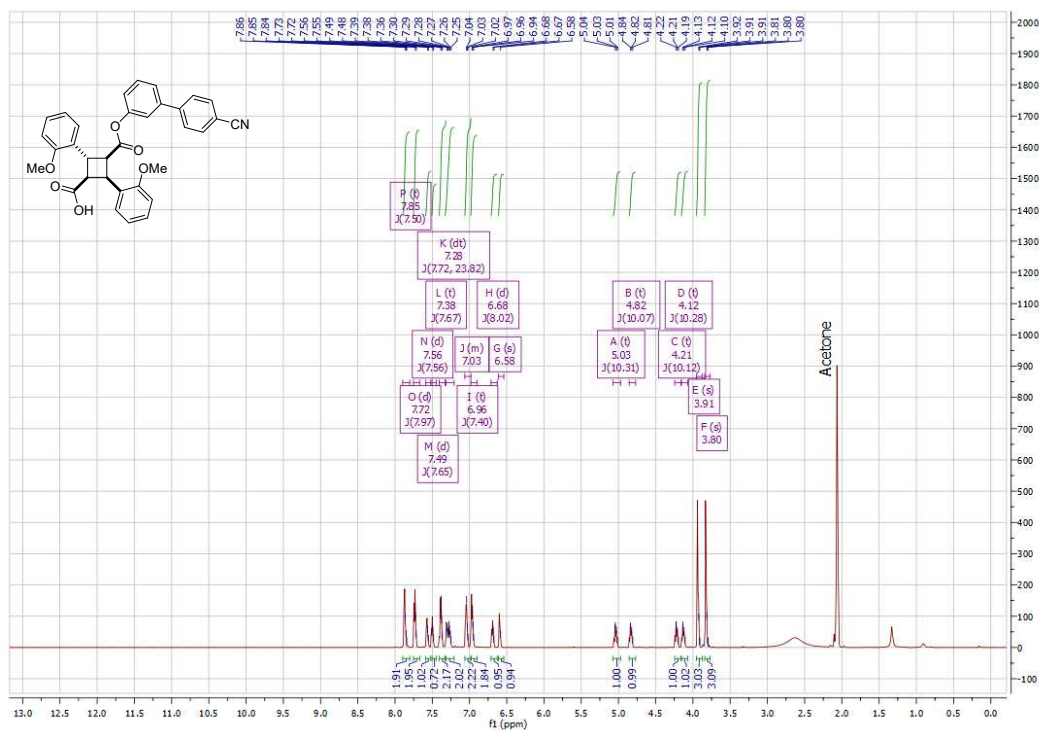

<sup>13</sup>C NMR of  $\gamma$ -19

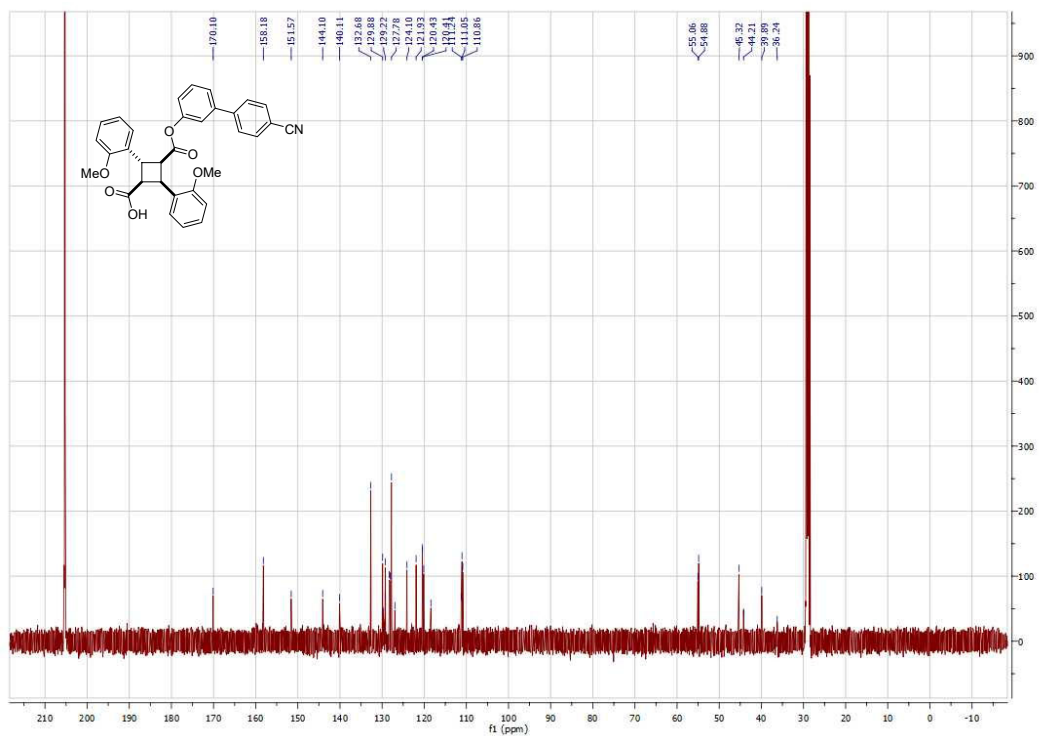

# <sup>1</sup>H NMR of $\gamma$ -102

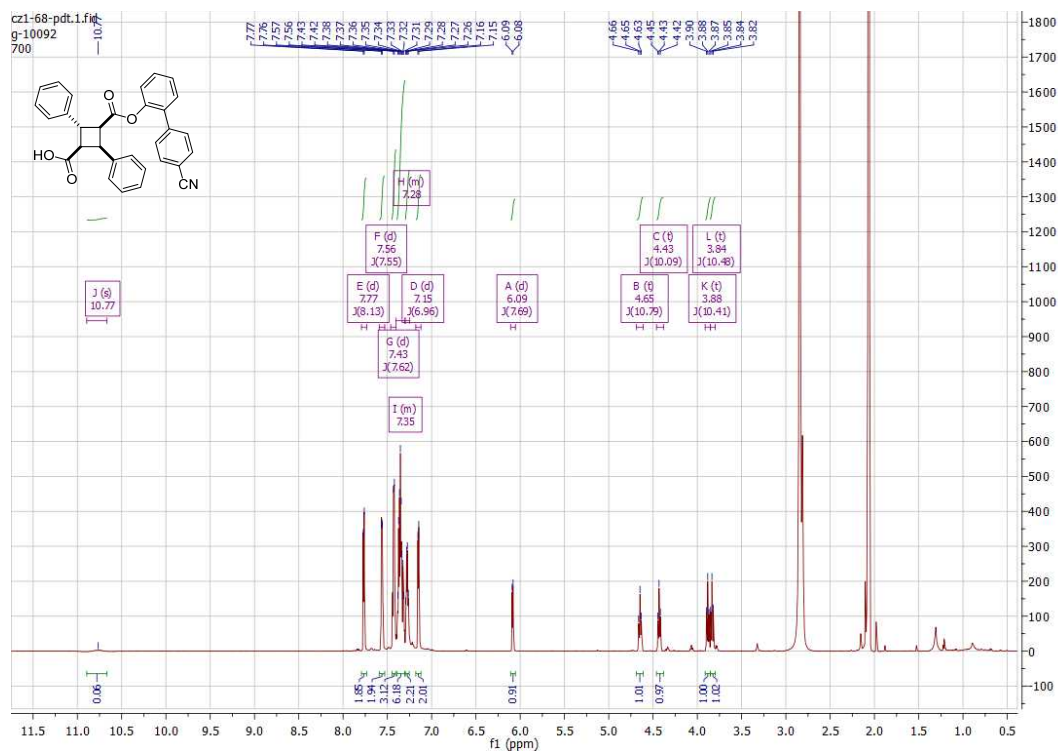

# <sup>13</sup>C NMR of $\gamma$ -102

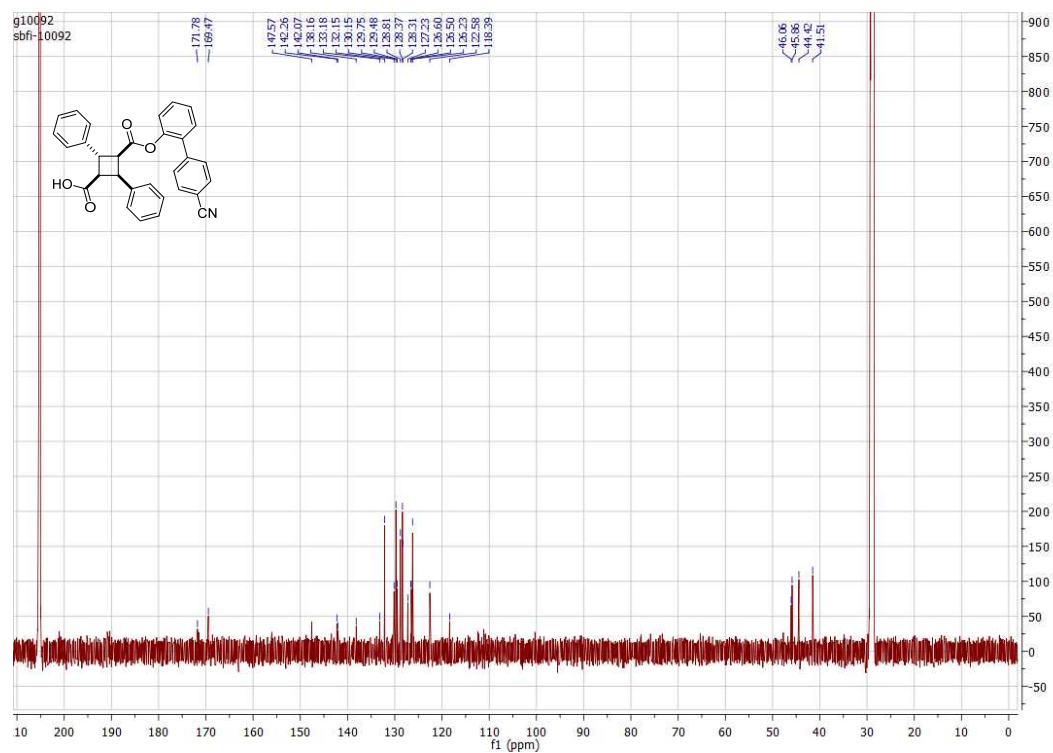

# <sup>1</sup>H NMR of $\gamma$ -103

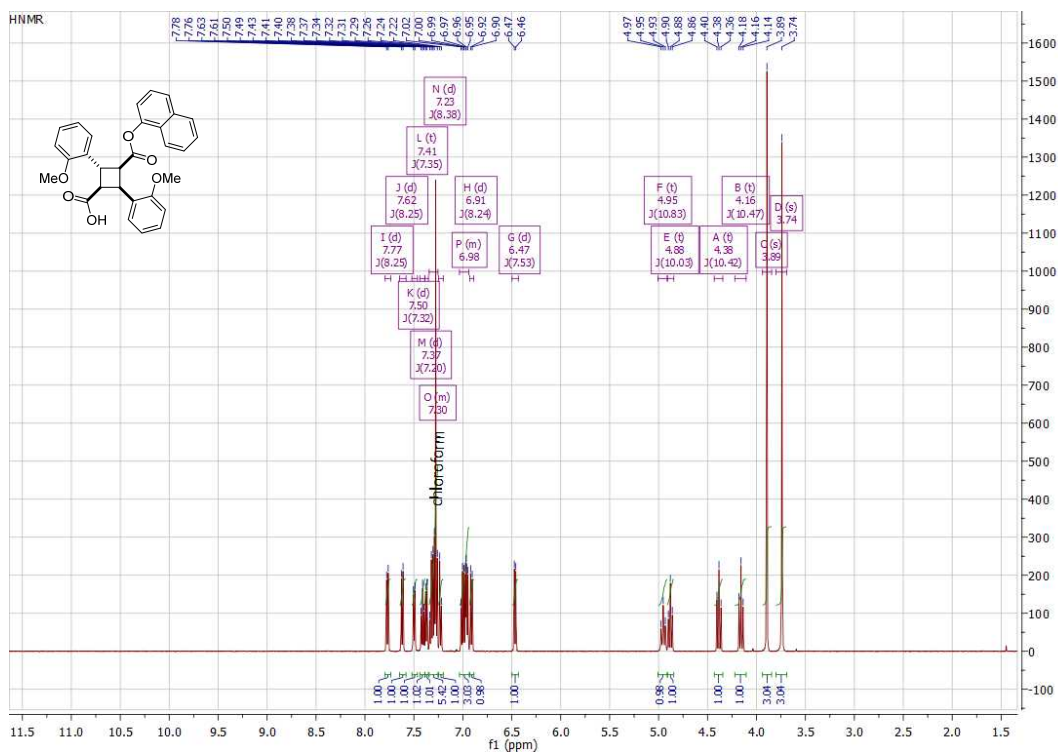

# <sup>13</sup>C NMR of $\gamma$ -103

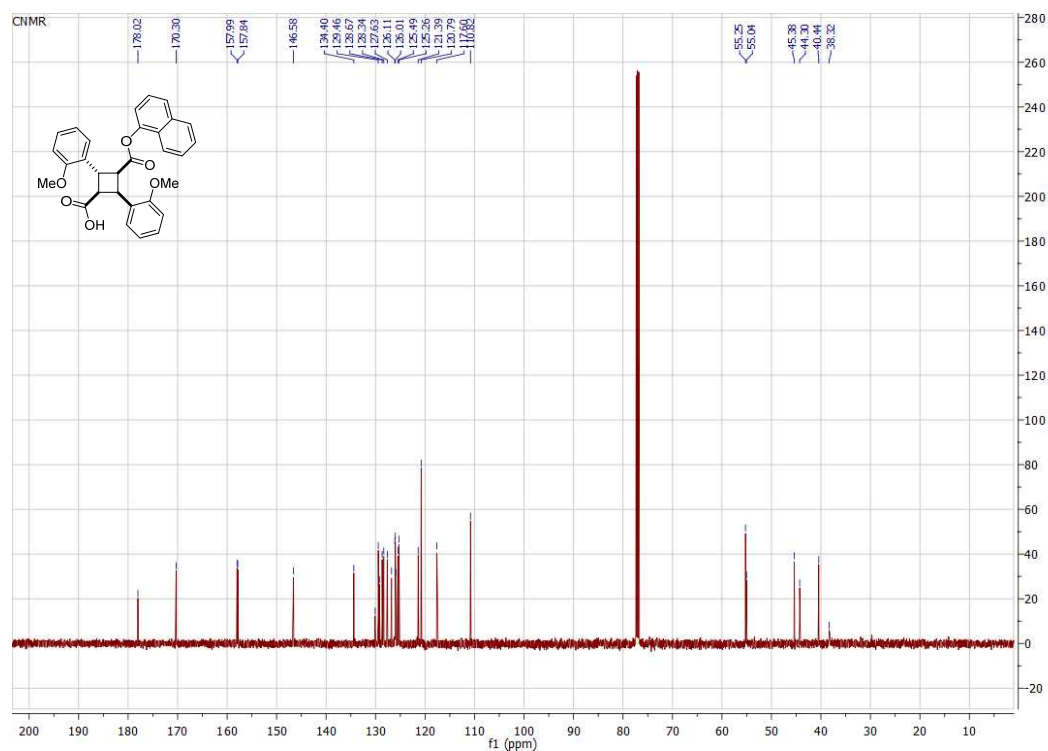



# <sup>1</sup>H NMR of $\gamma$ -104

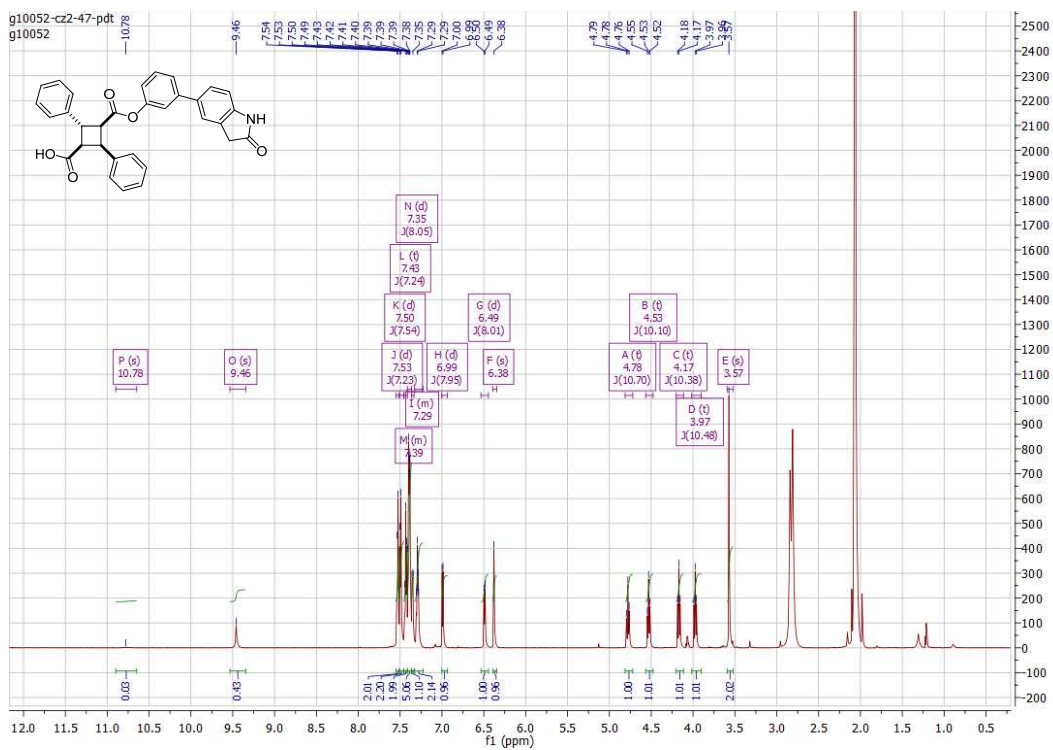

# <sup>13</sup>C NMR of $\gamma$ -104

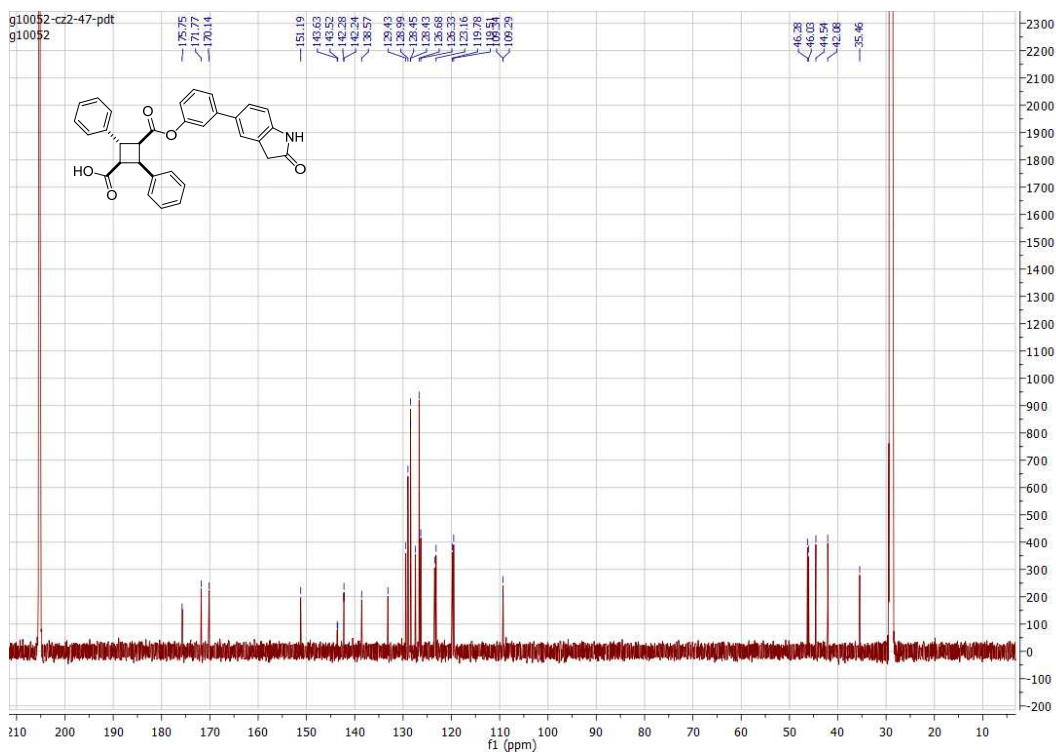

# <sup>1</sup>H NMR of $\gamma$ -105

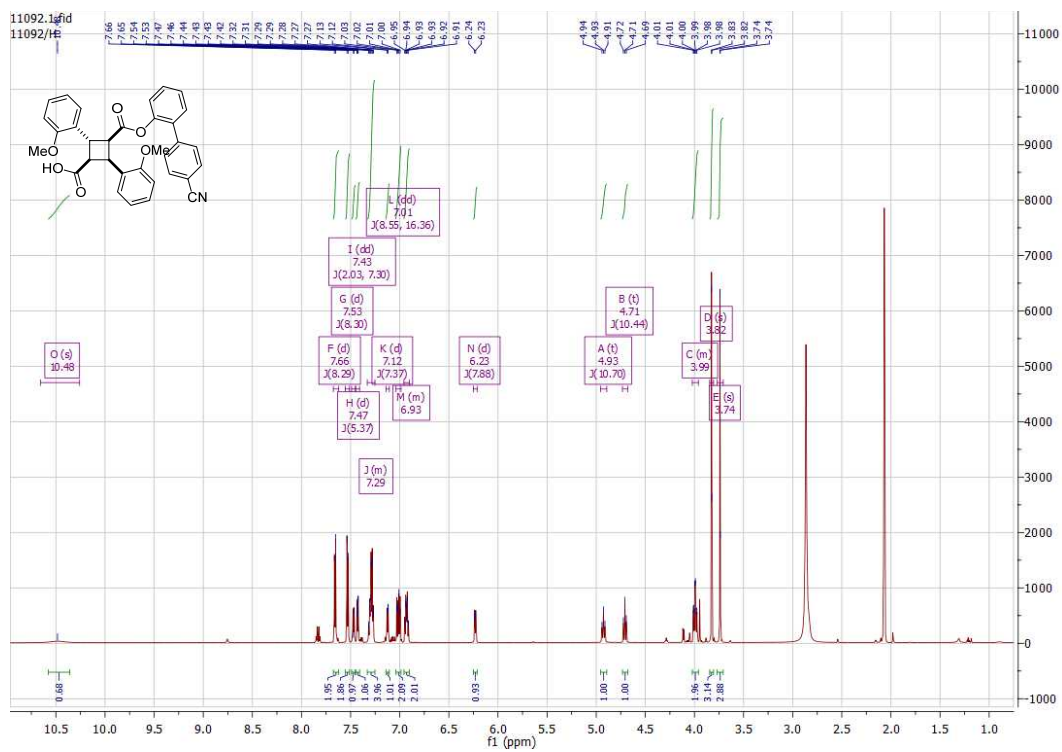

# <sup>13</sup>C NMR of $\gamma$ -105

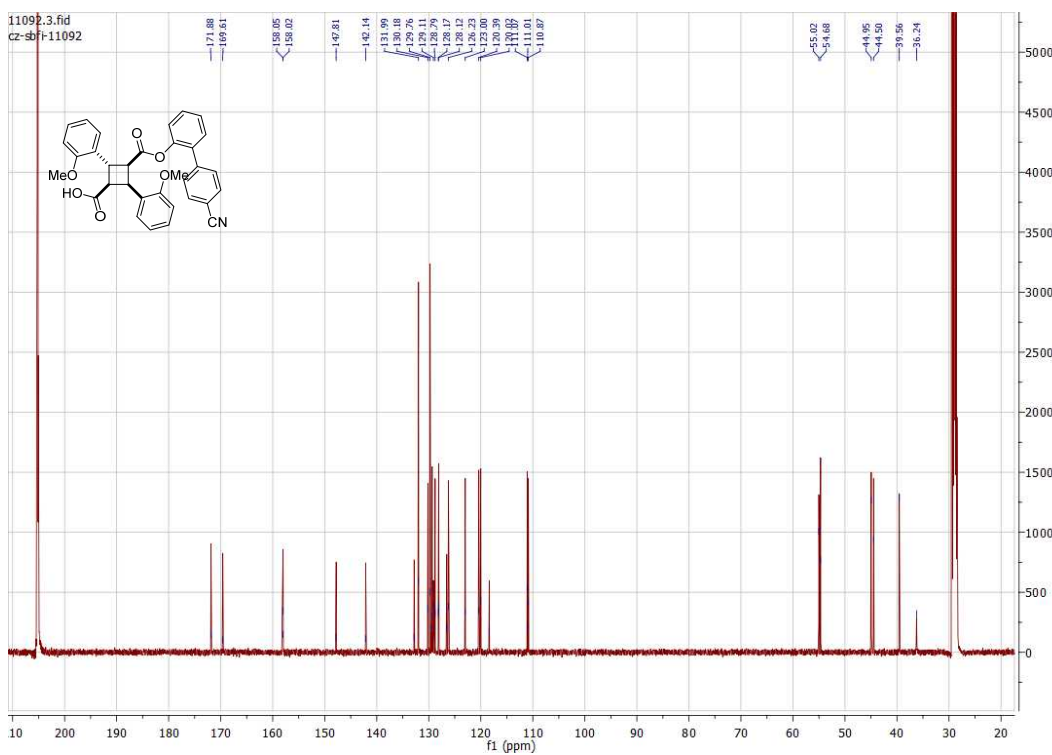

# <sup>1</sup>H NMR of $\gamma$ -106

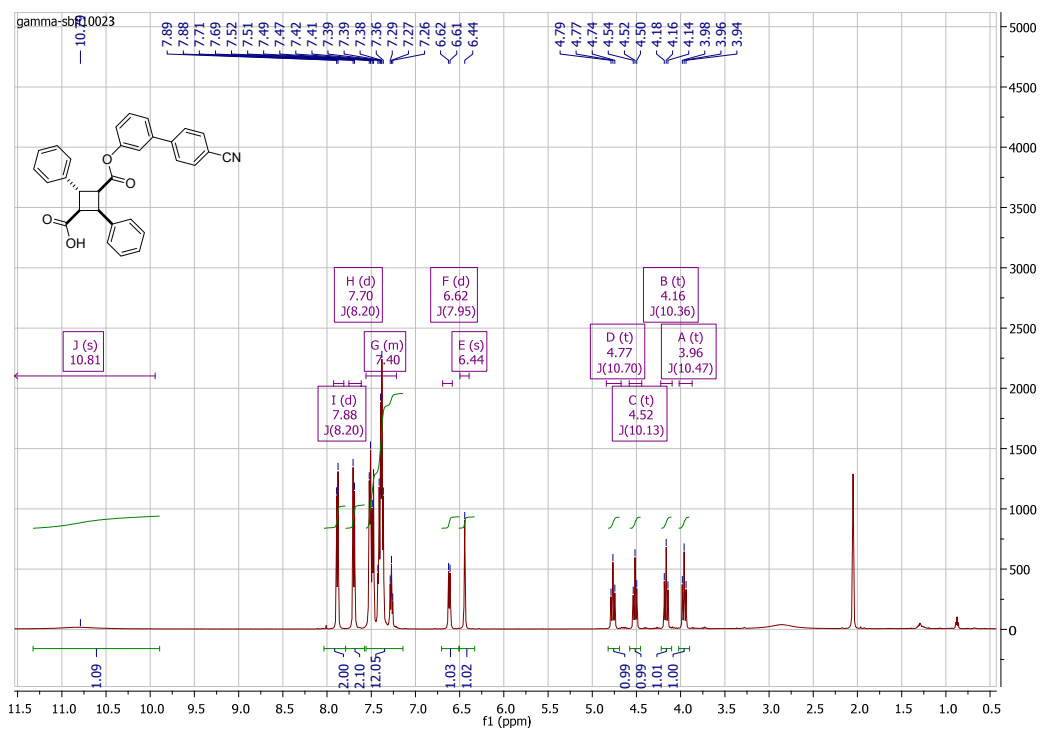

# <sup>13</sup>C NMR of $\gamma$ -106

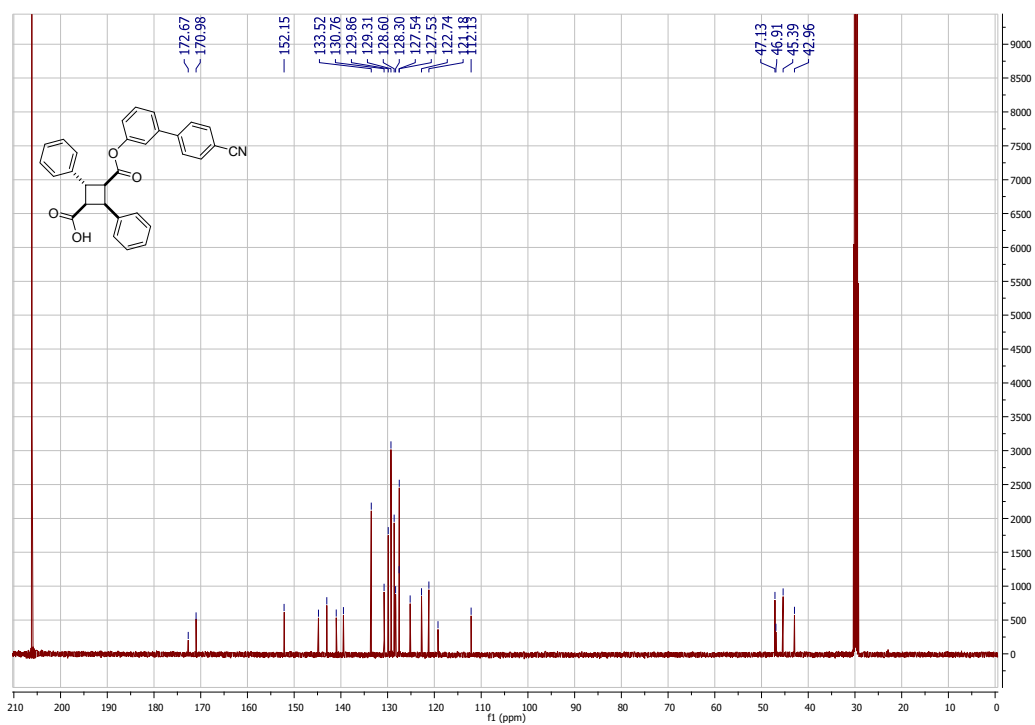

<sup>1</sup>H NMR of  $\gamma$ -107

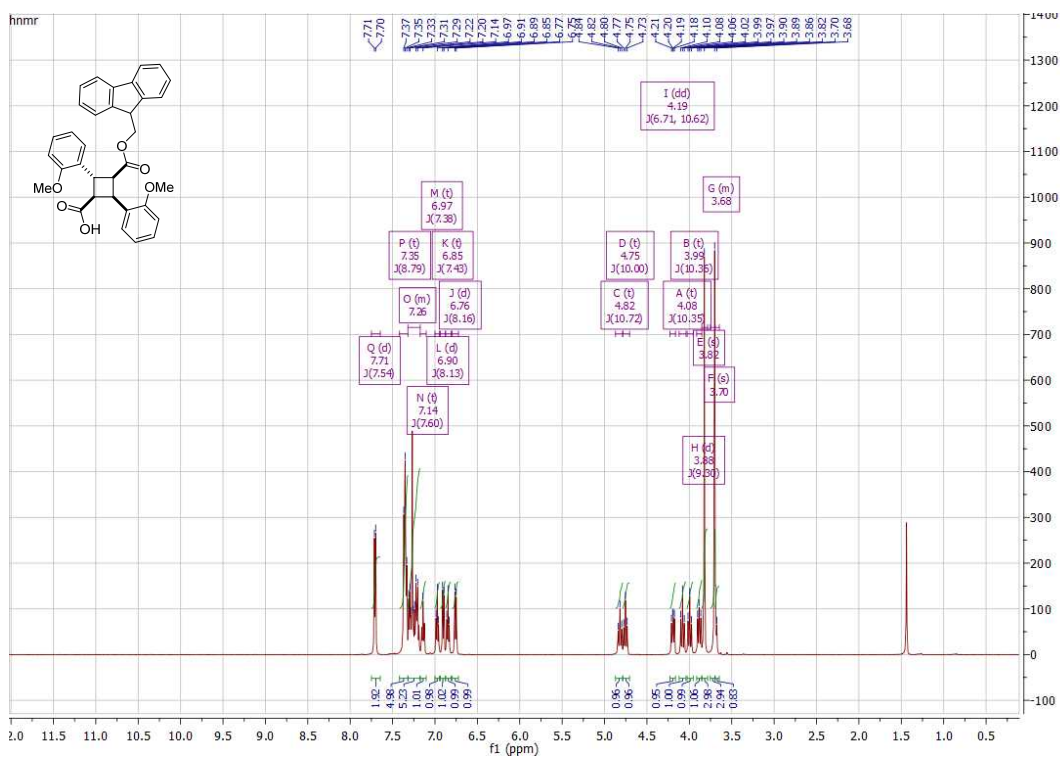

<sup>13</sup>C NMR of  $\gamma$ -107

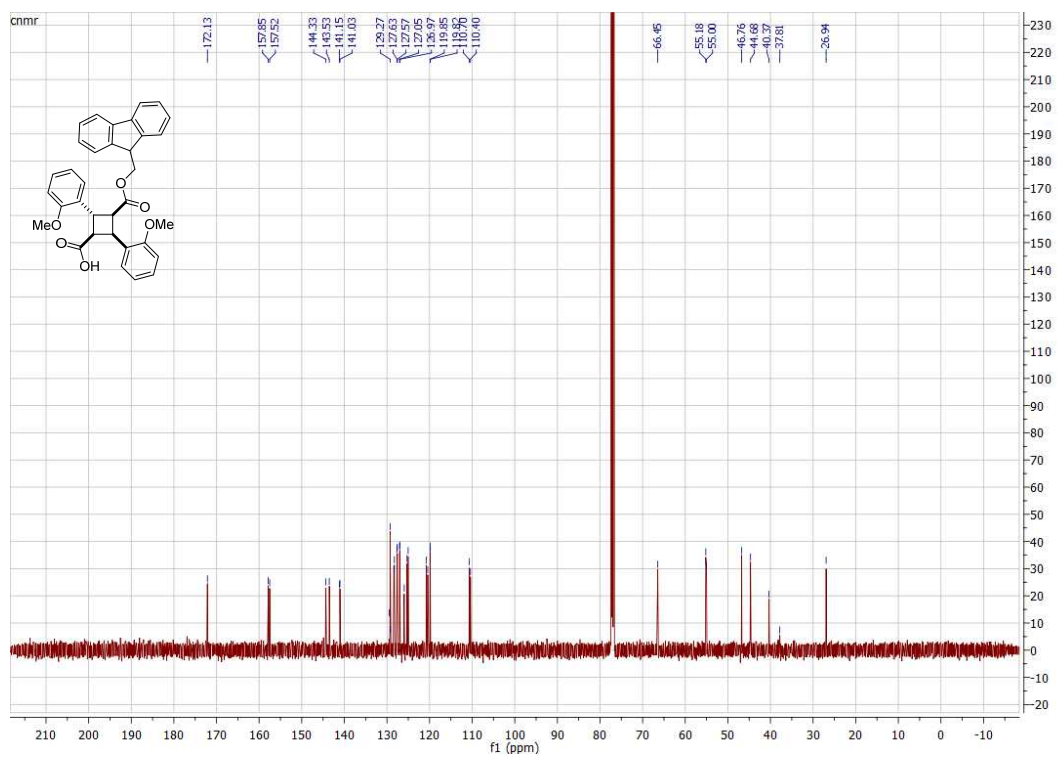

<sup>1</sup>H NMR of  $\gamma$ -108

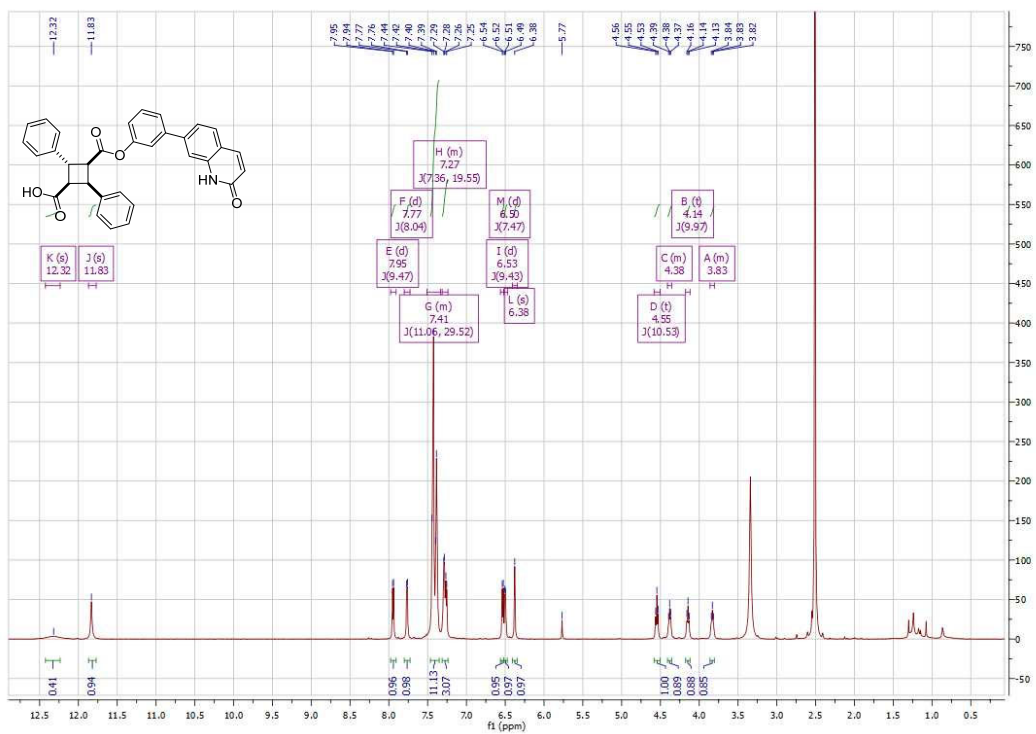

<sup>13</sup>C NMR of  $\gamma$ -108

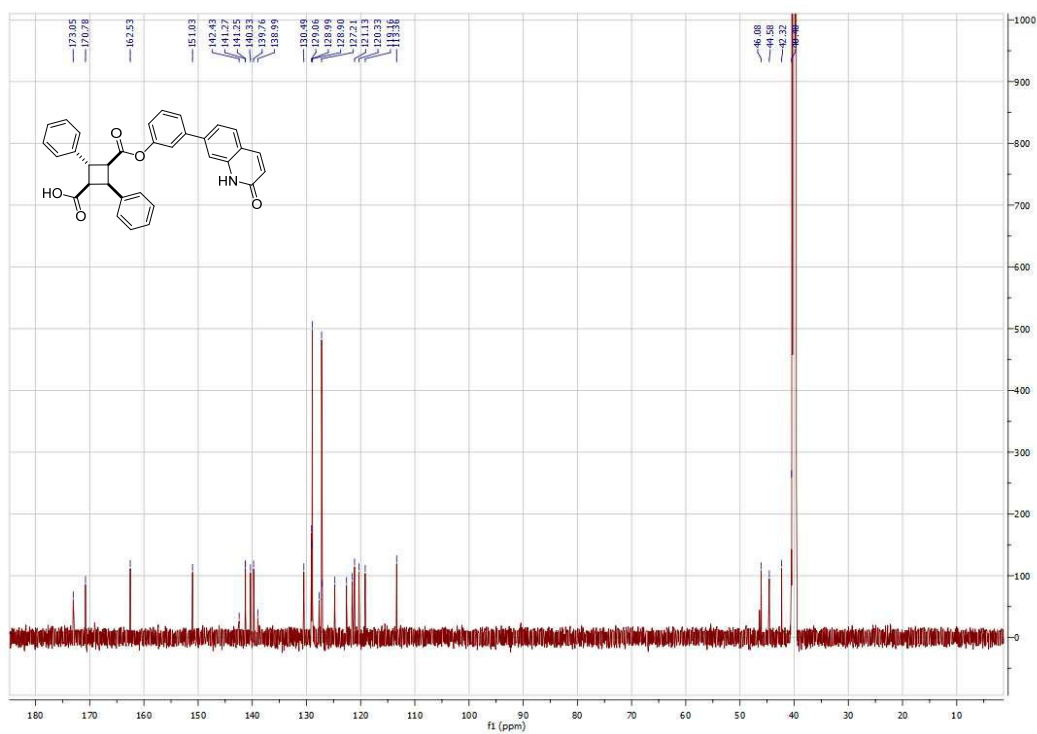

# <sup>1</sup>H NMR of $\gamma$ -109

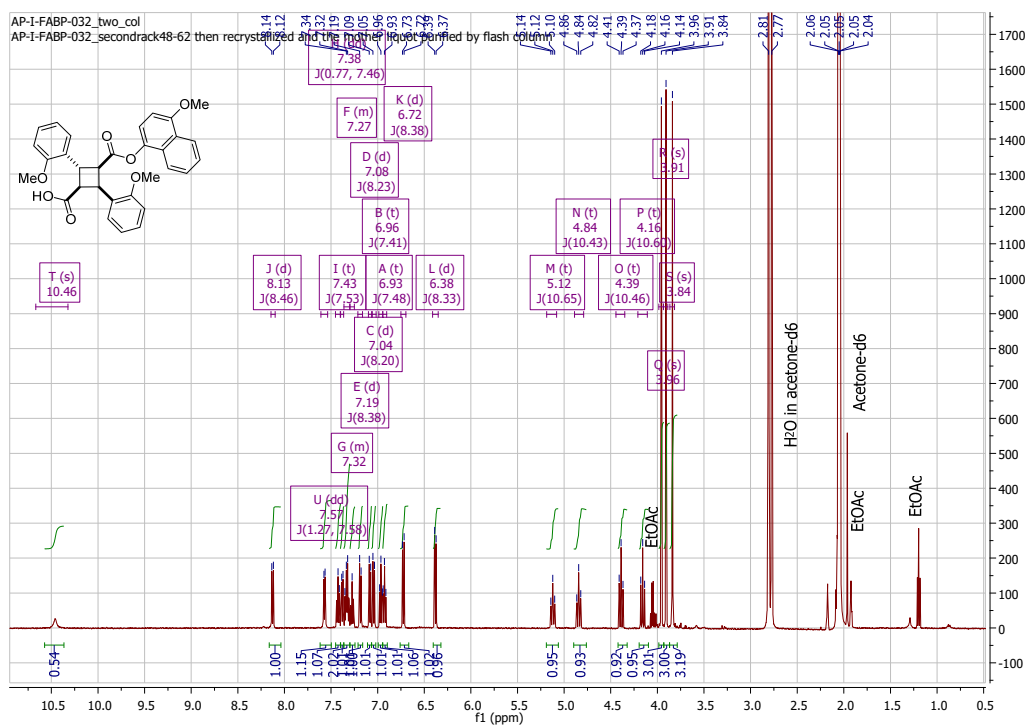

# <sup>13</sup>C NMR of $\gamma$ -109

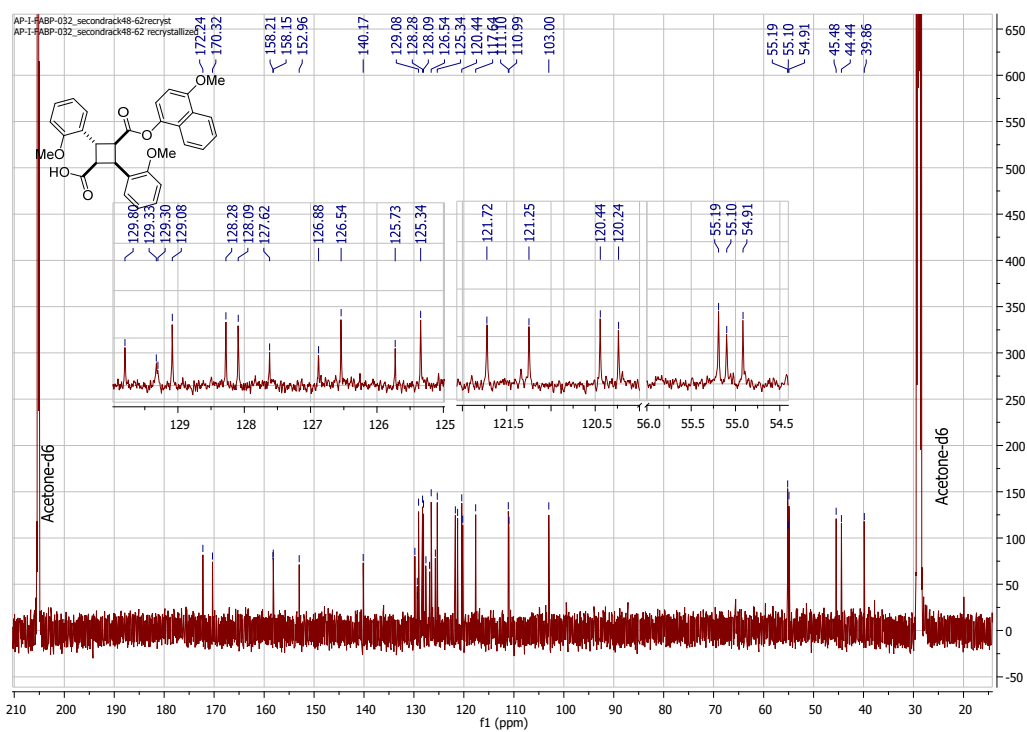

<sup>1</sup>H NMR of ε-5

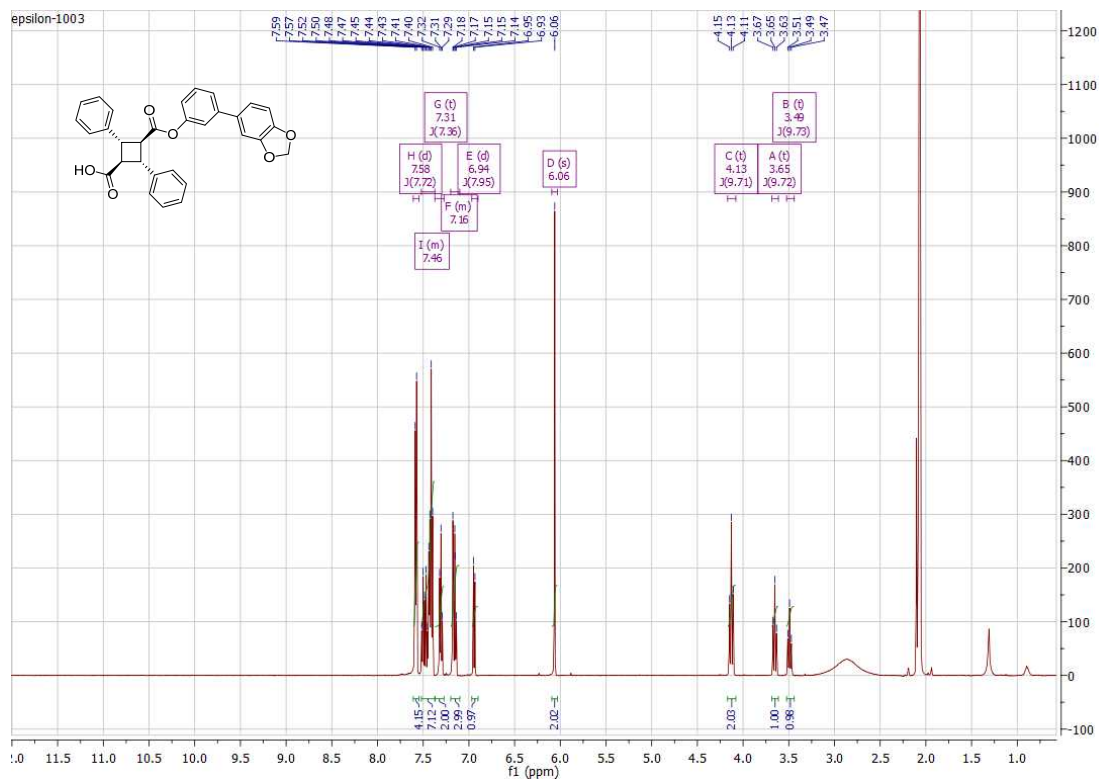

<sup>13</sup>C NMR of ε-5

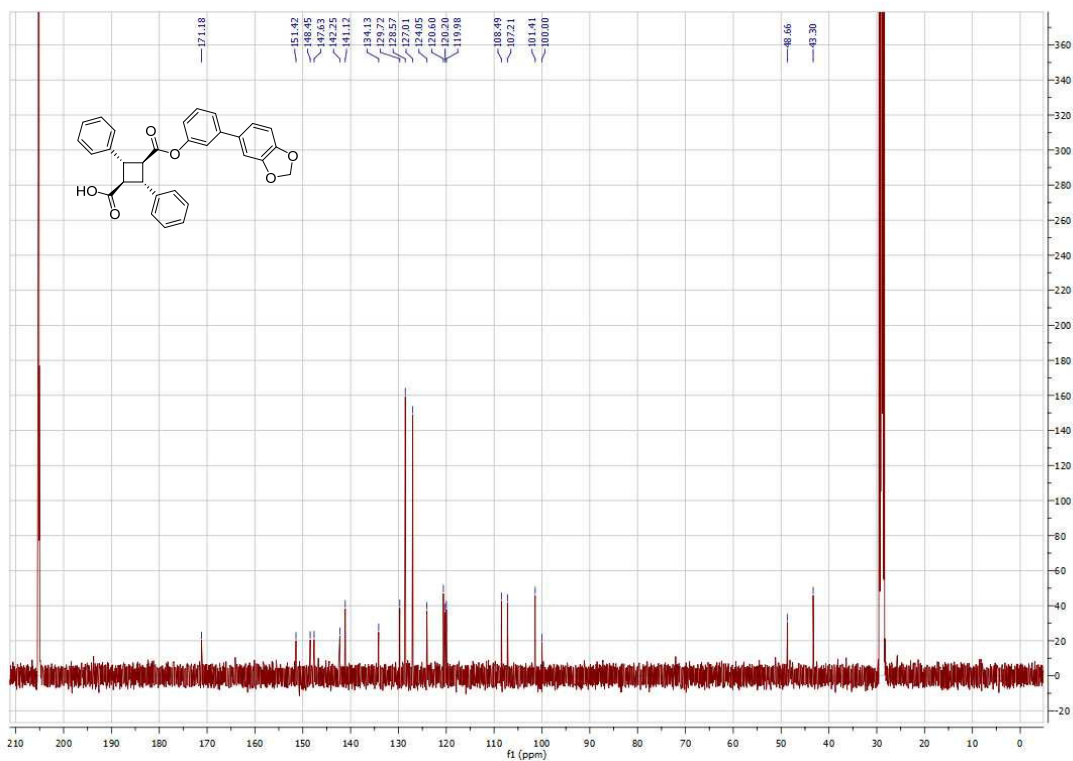

# <sup>1</sup>H NMR of ε-11

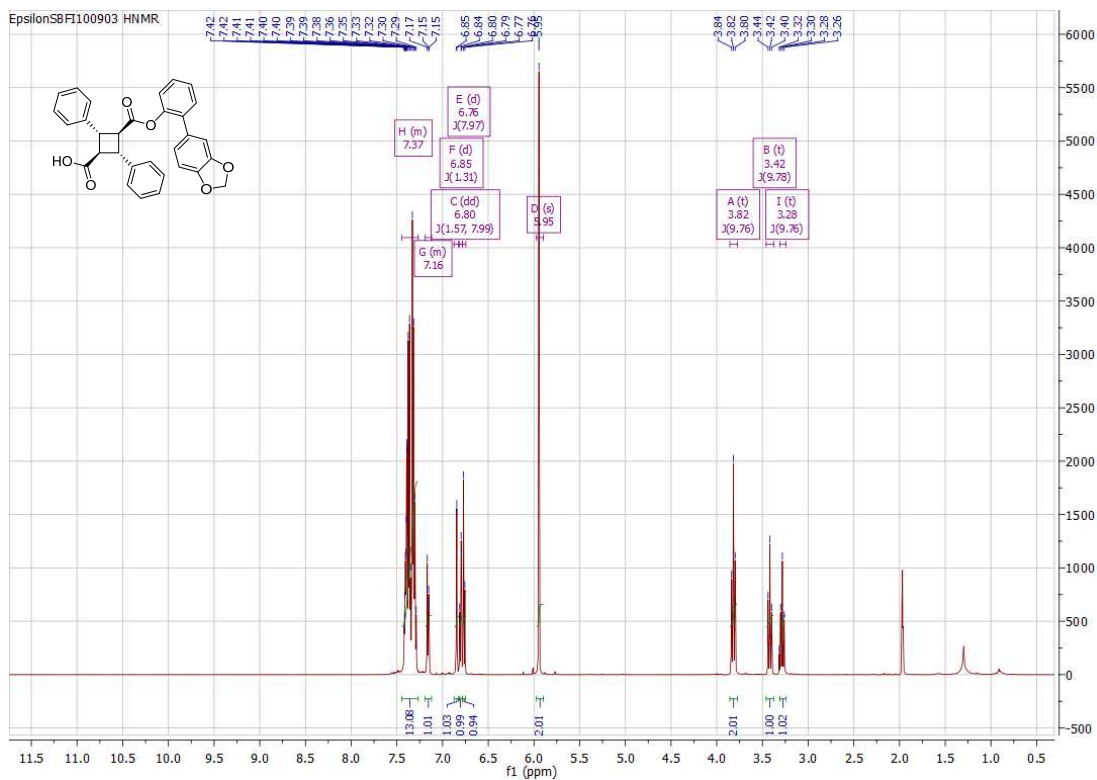

# <sup>13</sup>C NMR of ε-11

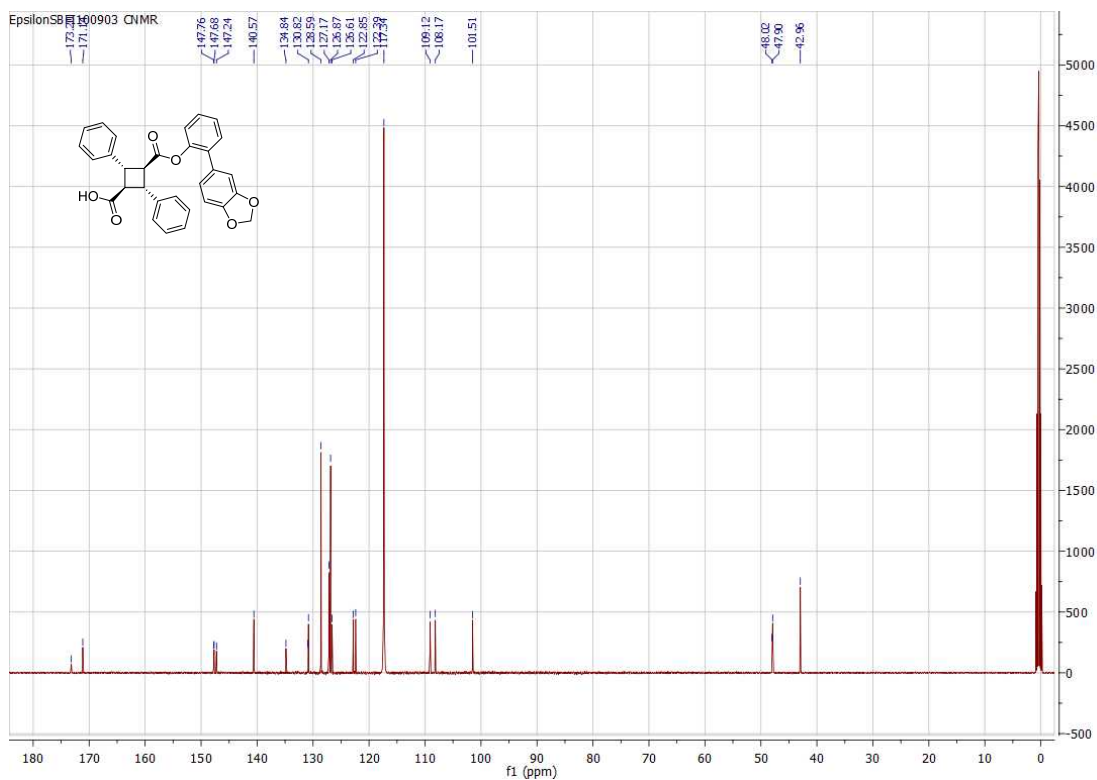



# <sup>1</sup>H NMR of ε-23

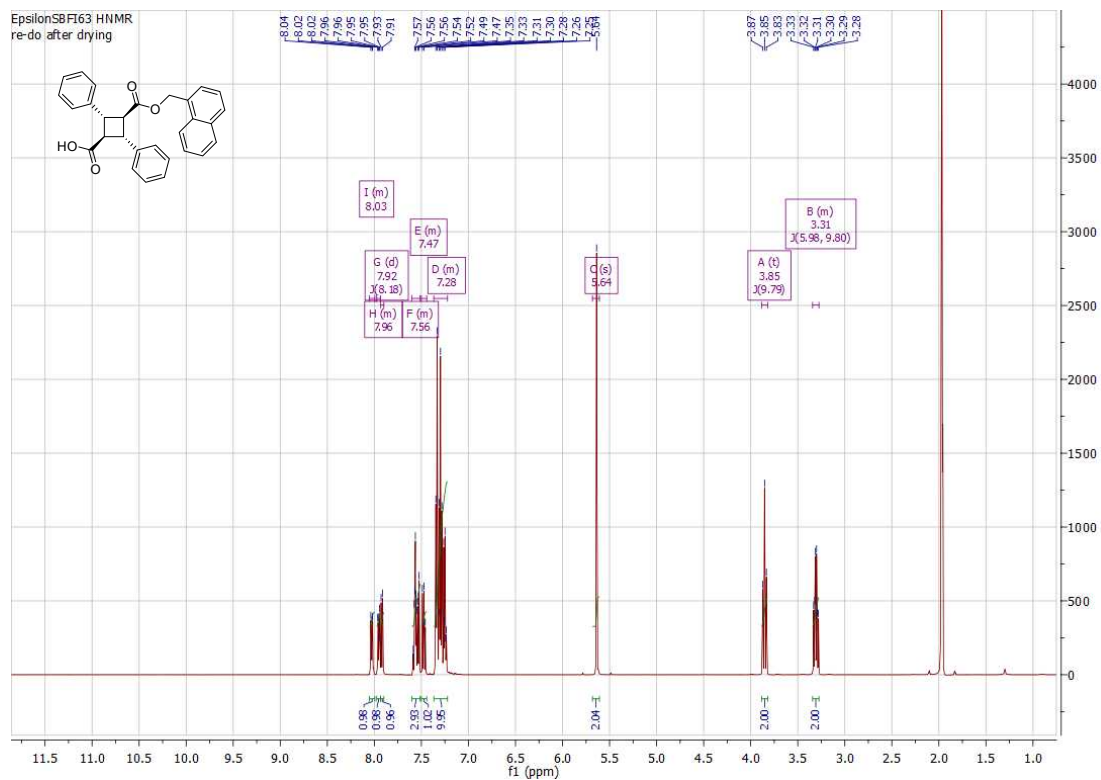

# <sup>13</sup>C NMR of ε-23

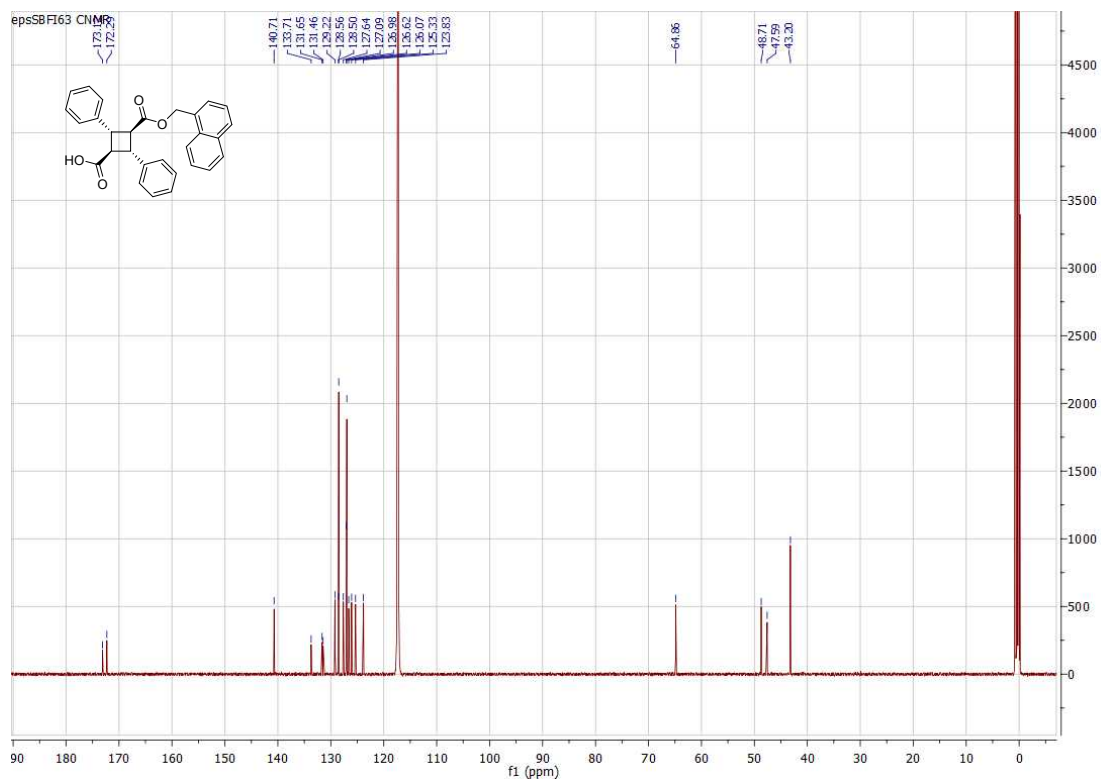

# <sup>1</sup>H NMR of ε-201

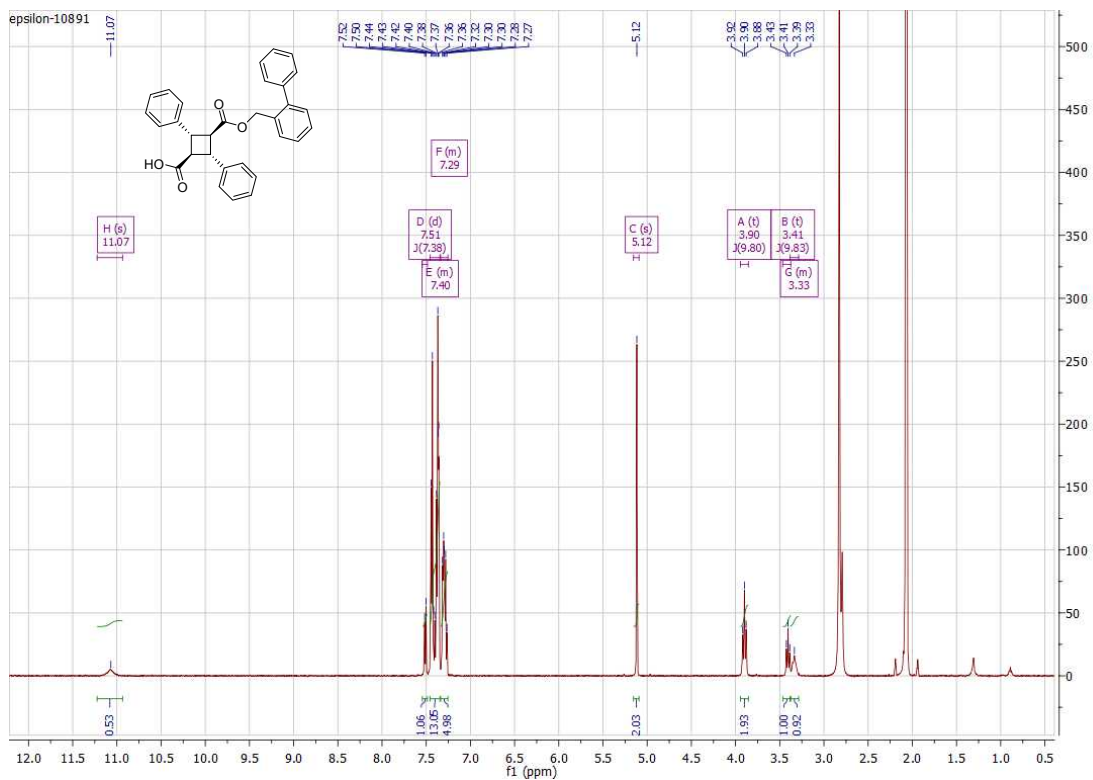

# <sup>13</sup>C NMR of ε-201

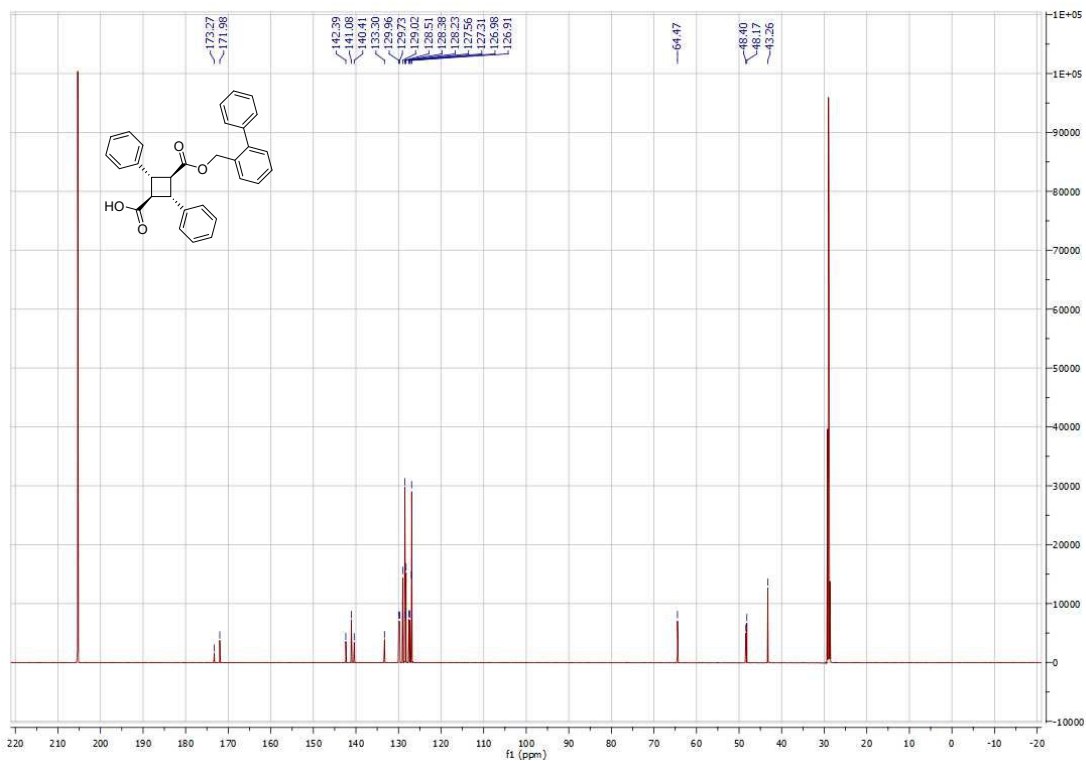

# <sup>1</sup>H NMR of ε-202

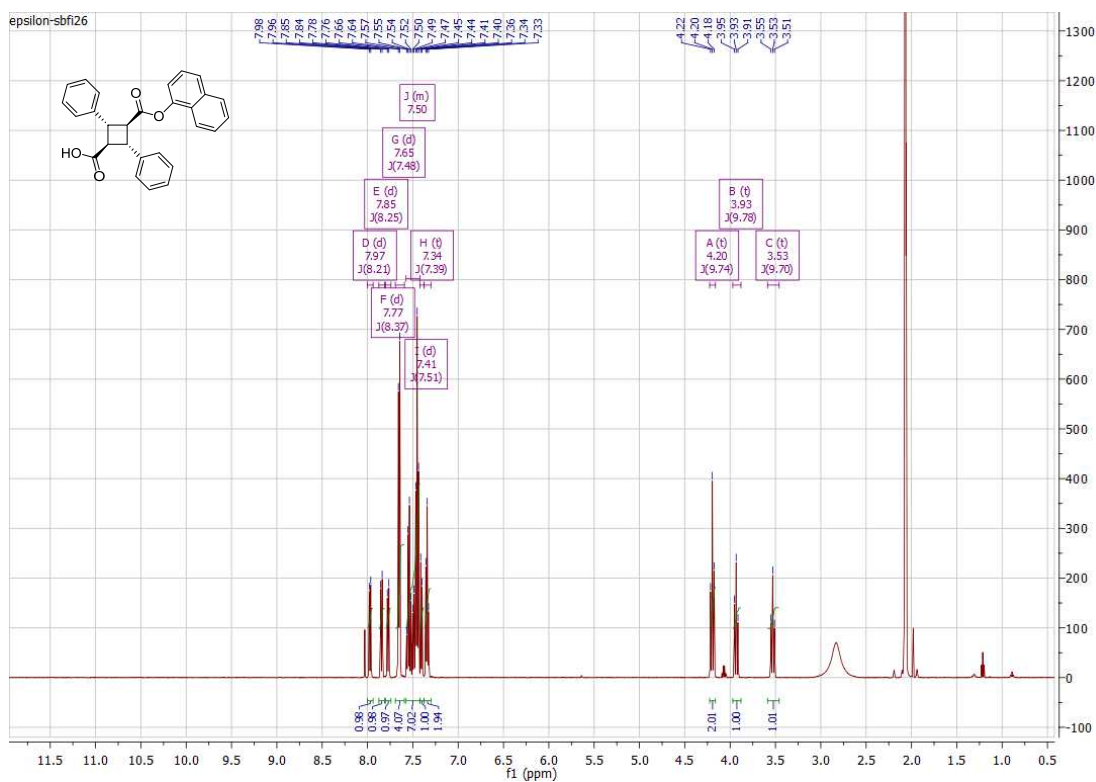

# <sup>13</sup>C NMR of ε-202

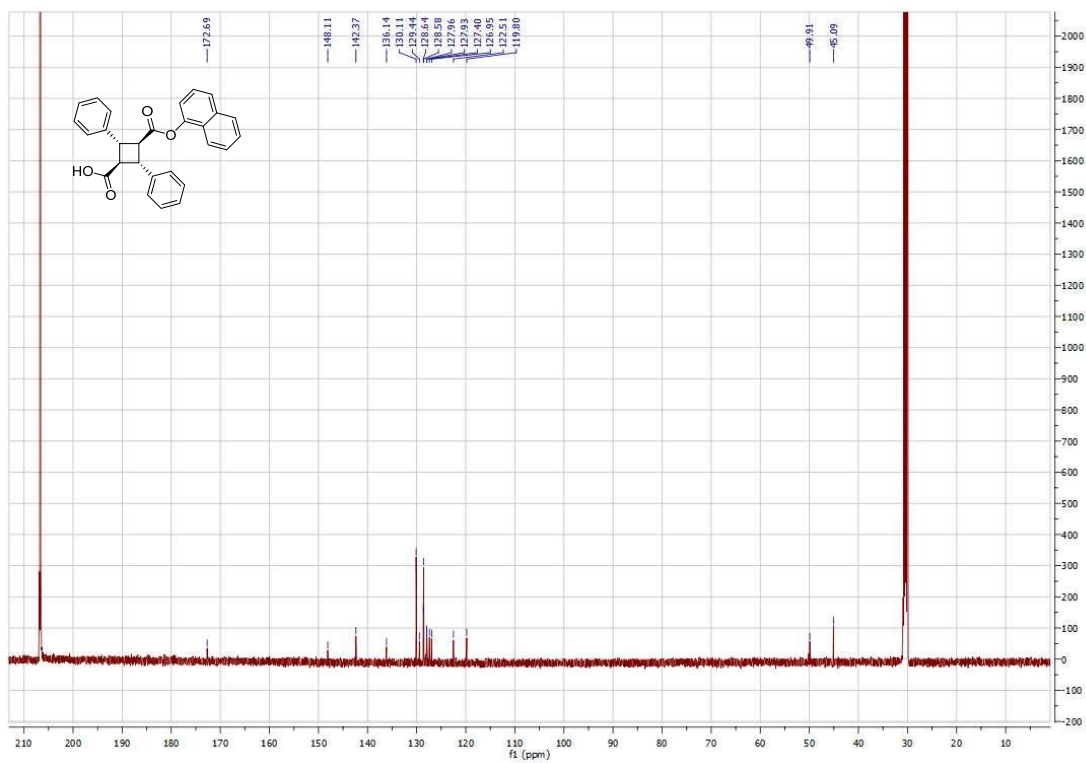

# <sup>1</sup>H NMR of ε-203

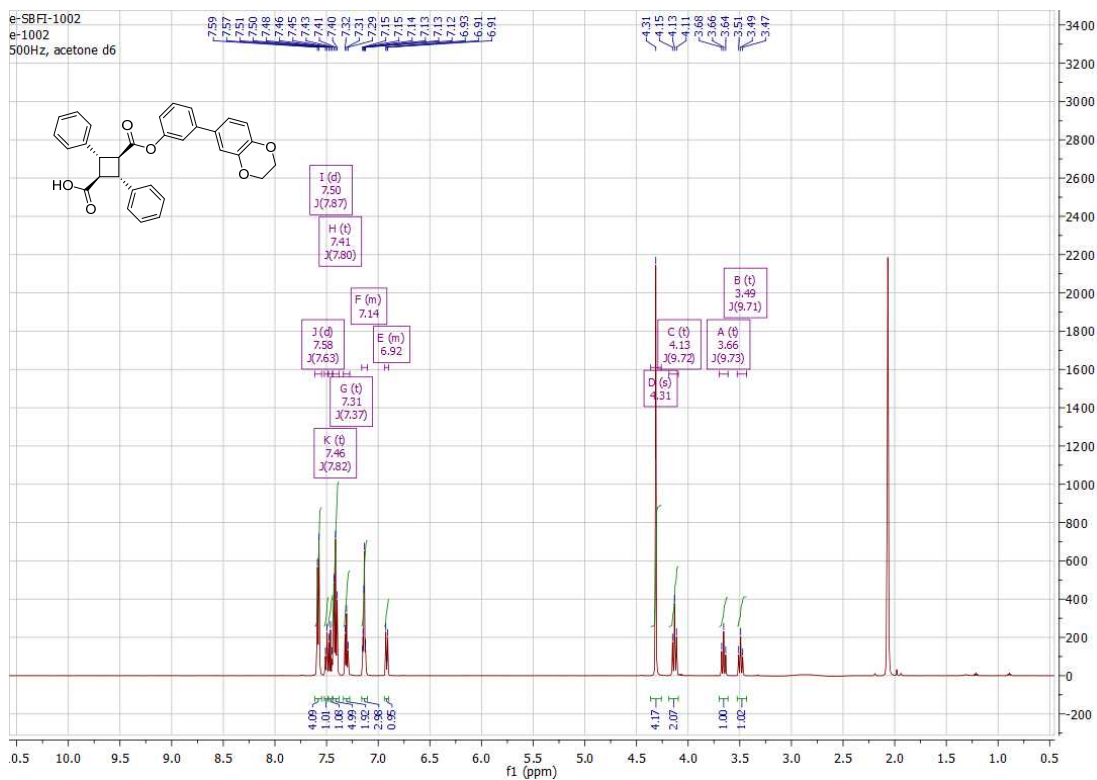

# <sup>13</sup>C NMR of ε-203

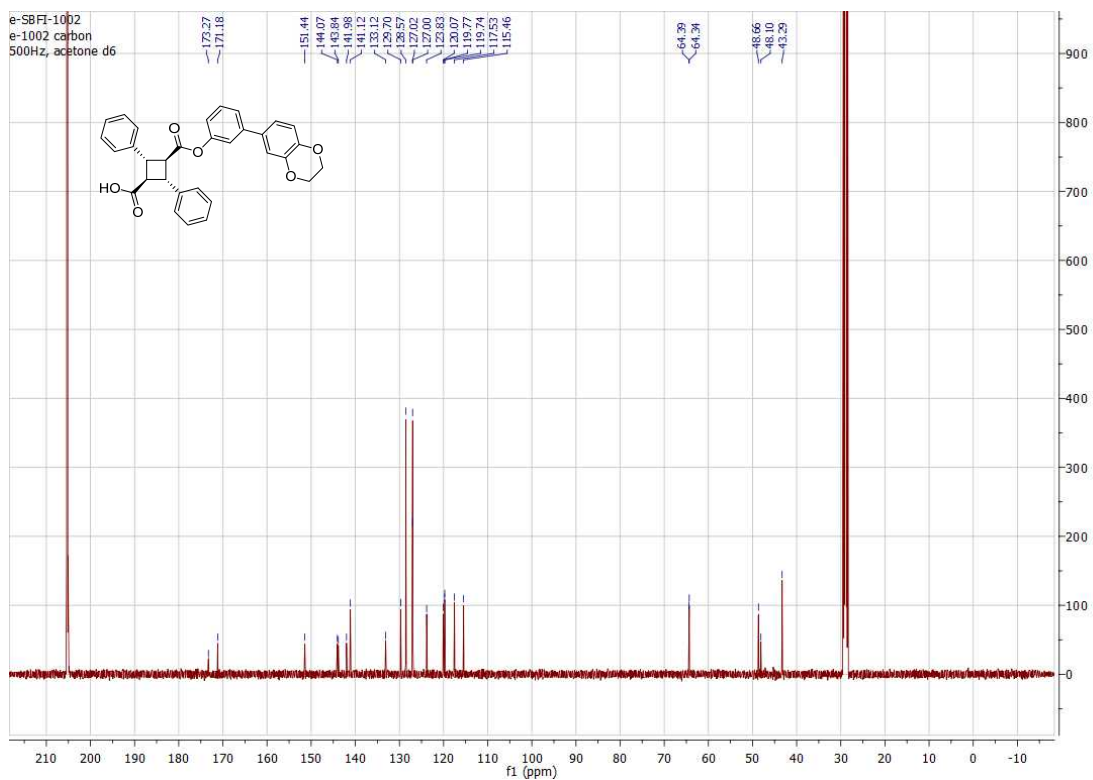

# <sup>1</sup>H NMR of ε-204

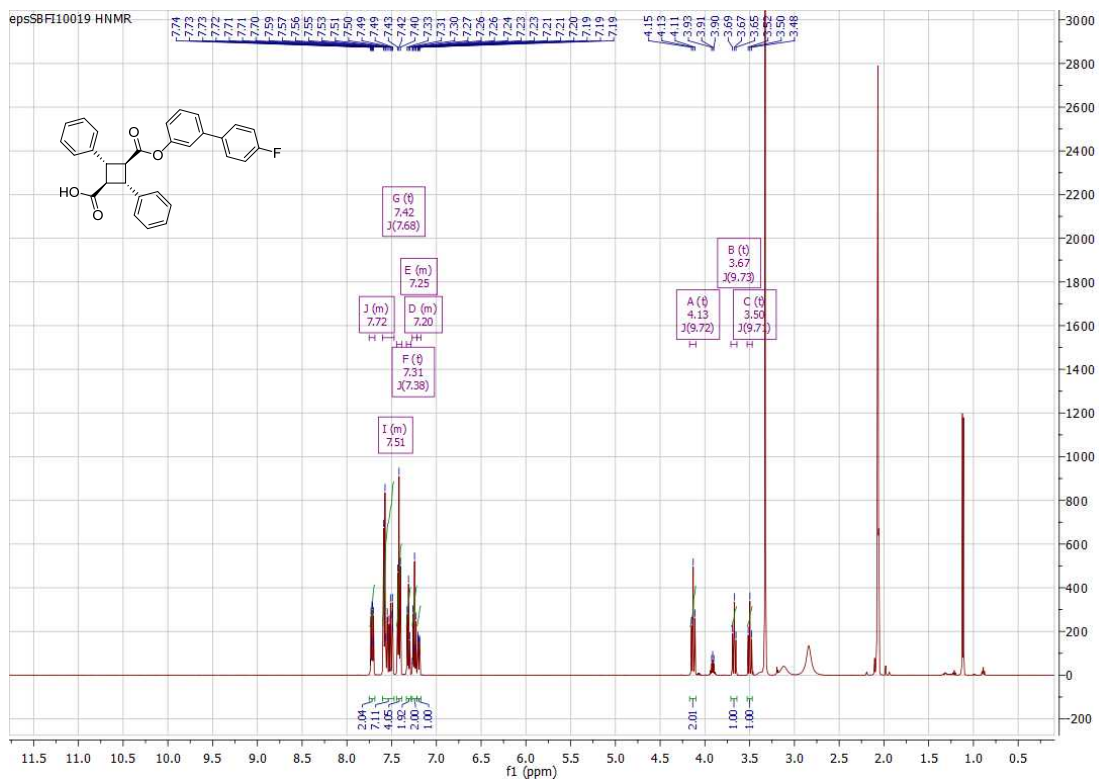

# <sup>13</sup>C NMR of ε-204

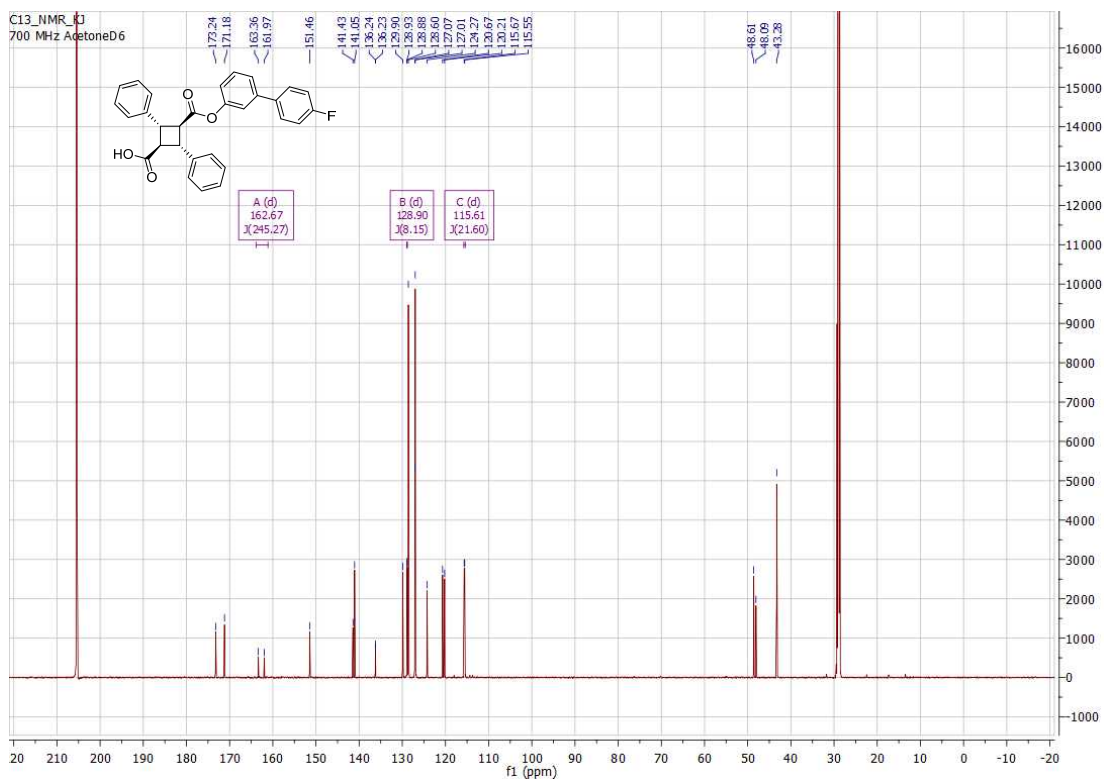

# $^{19}\text{F}$ NMR of $\epsilon$ -204

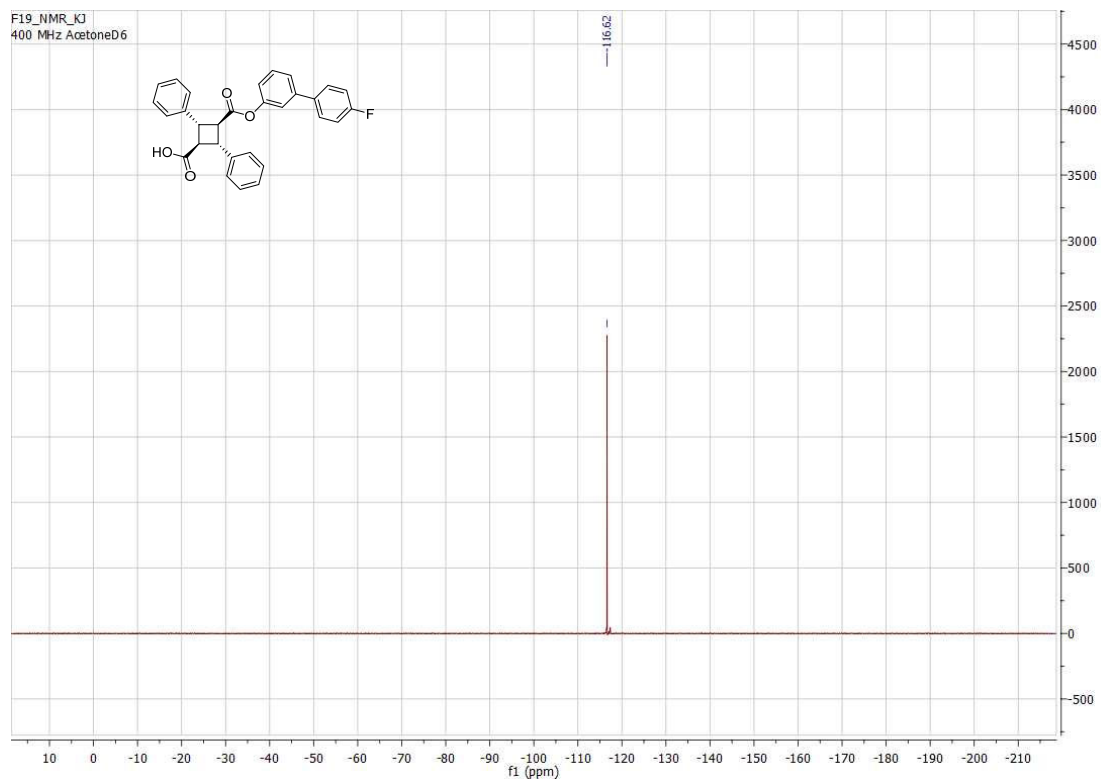

# $^1\text{H}$ NMR of $\epsilon$ -206

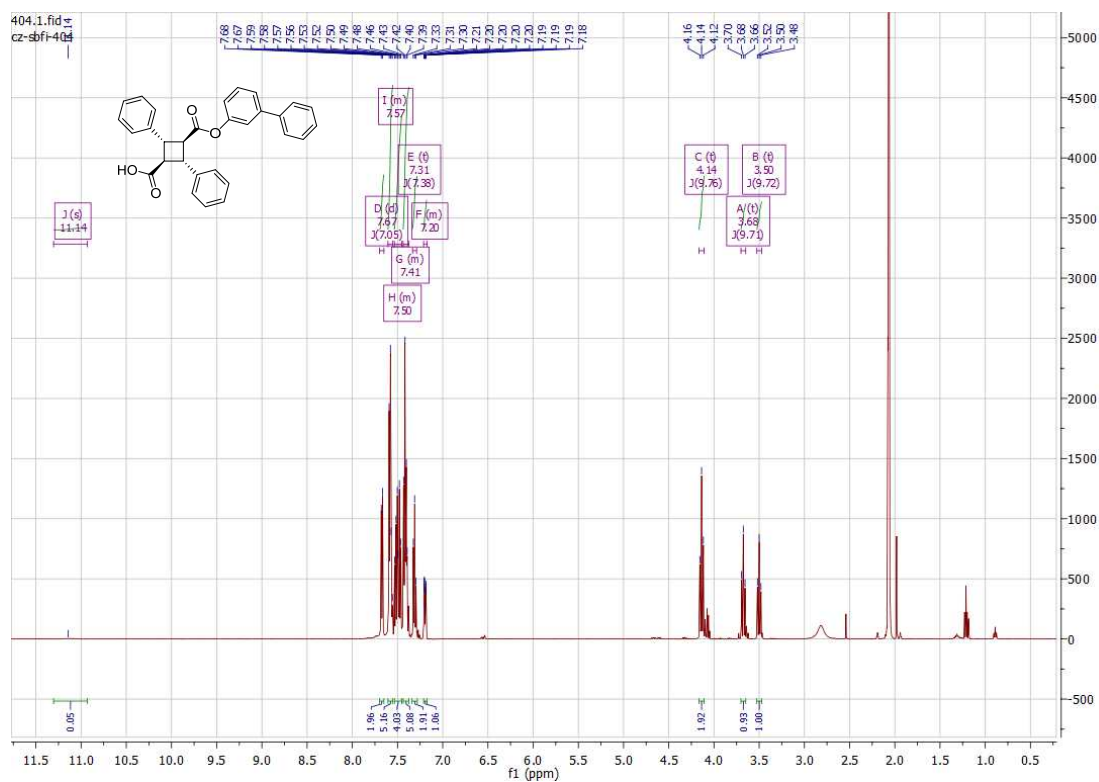

# $^{13}\text{C}$ NMR of $\epsilon$ -206

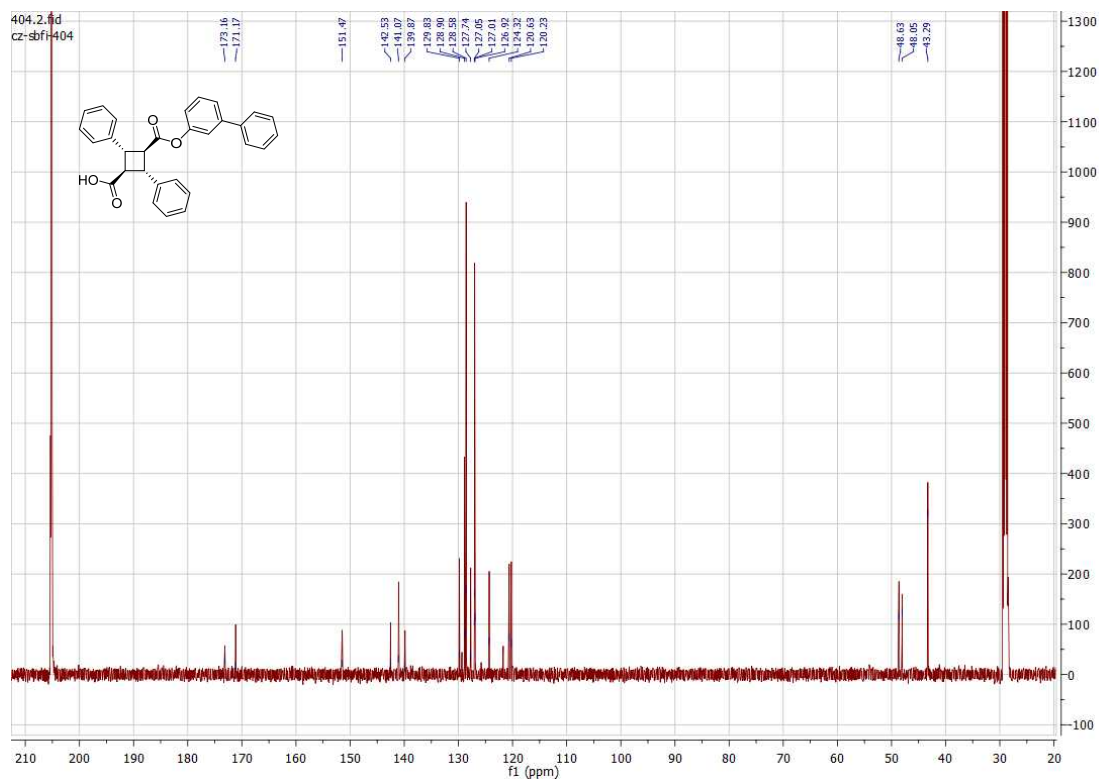

<sup>1</sup>H NMR of ε-207

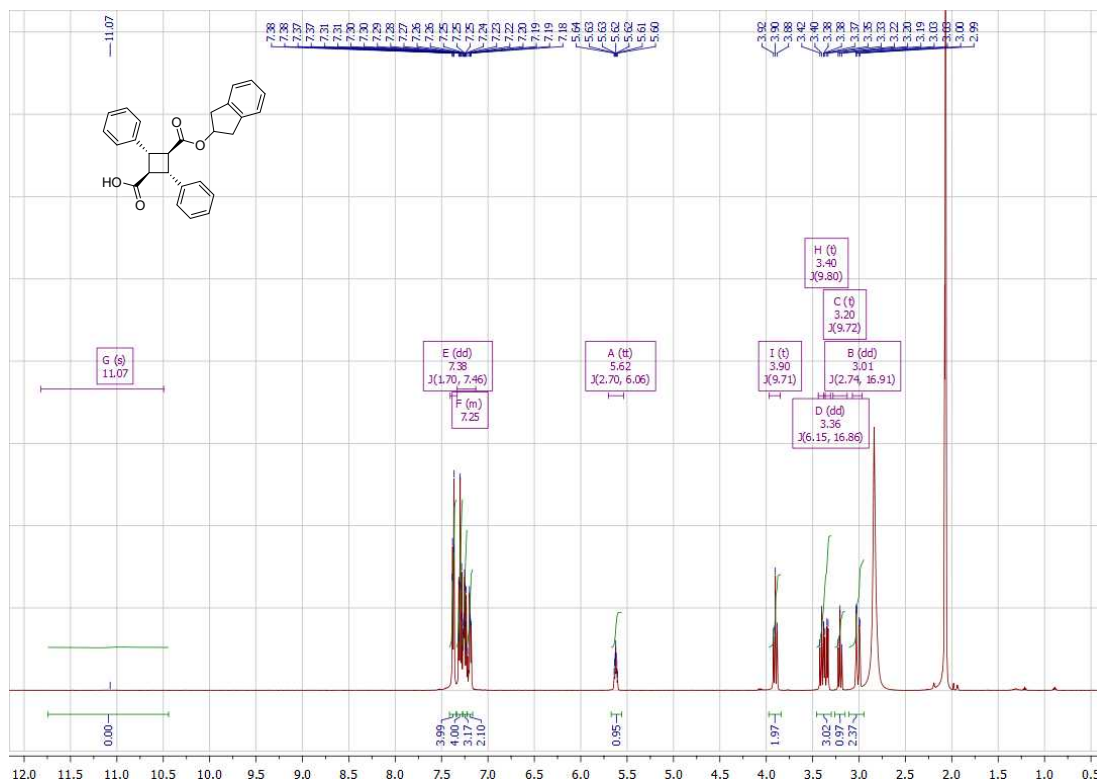

<sup>13</sup>C NMR of ε-207

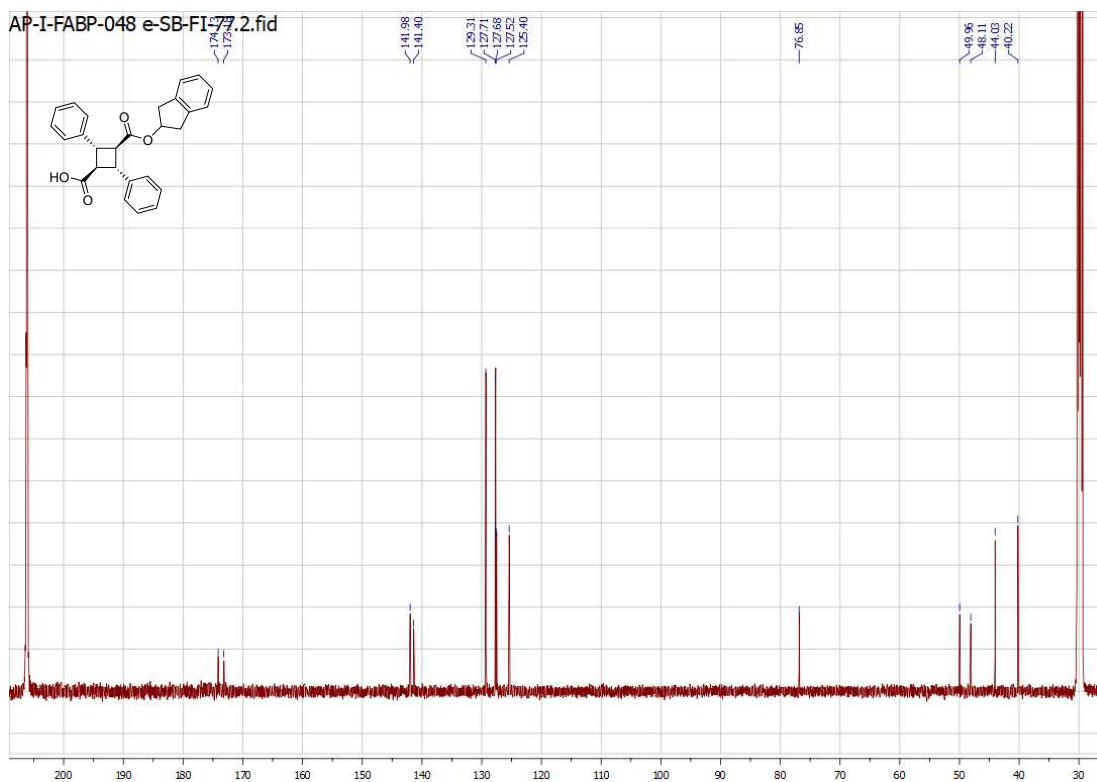





# <sup>1</sup>H NMR of (A-2)

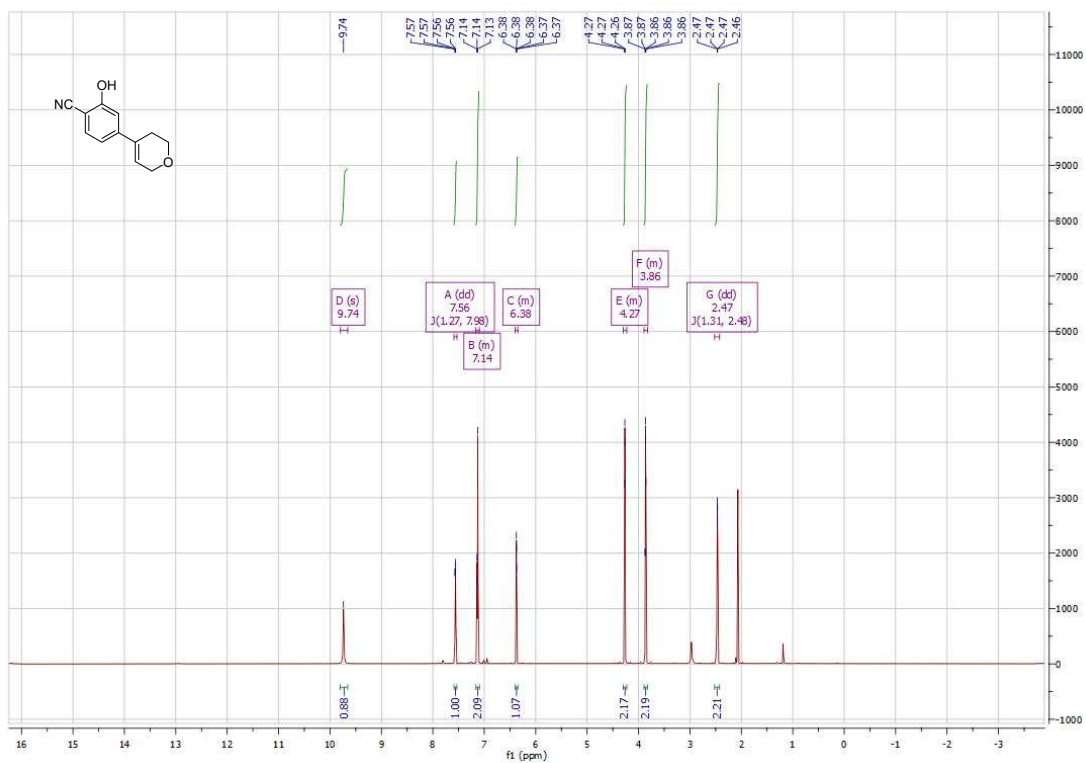

# <sup>13</sup>C NMR of (A-2)

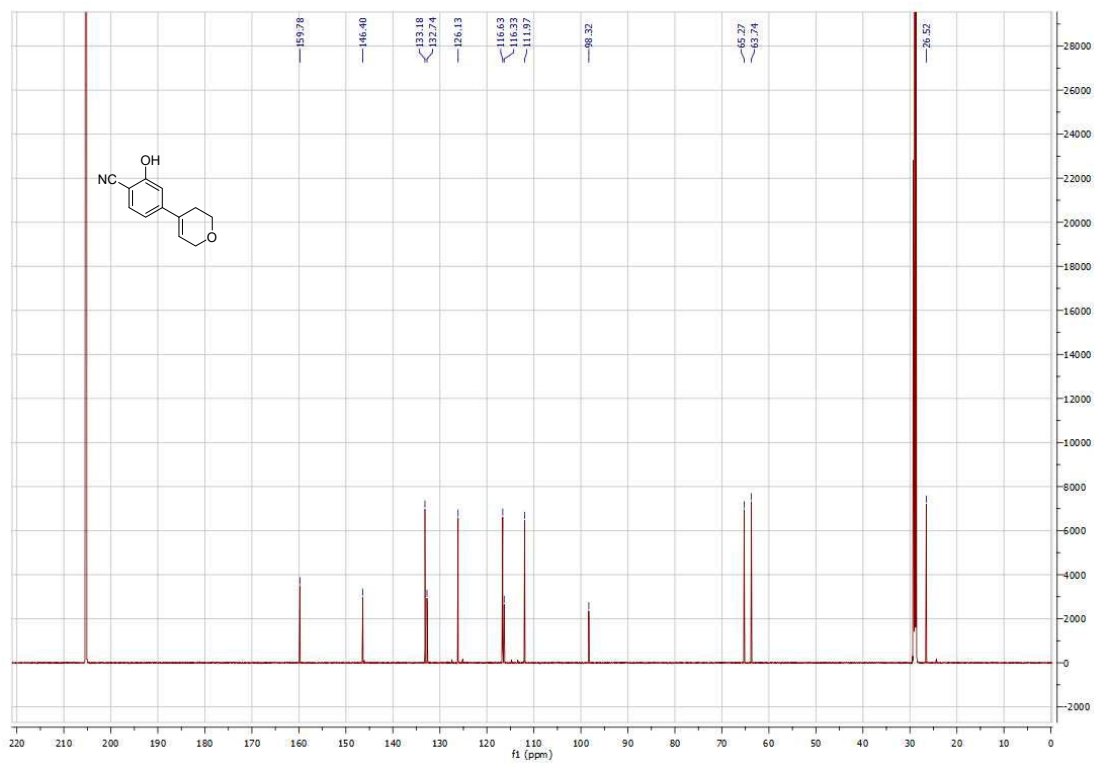

# <sup>1</sup>H NMR of (A-3)

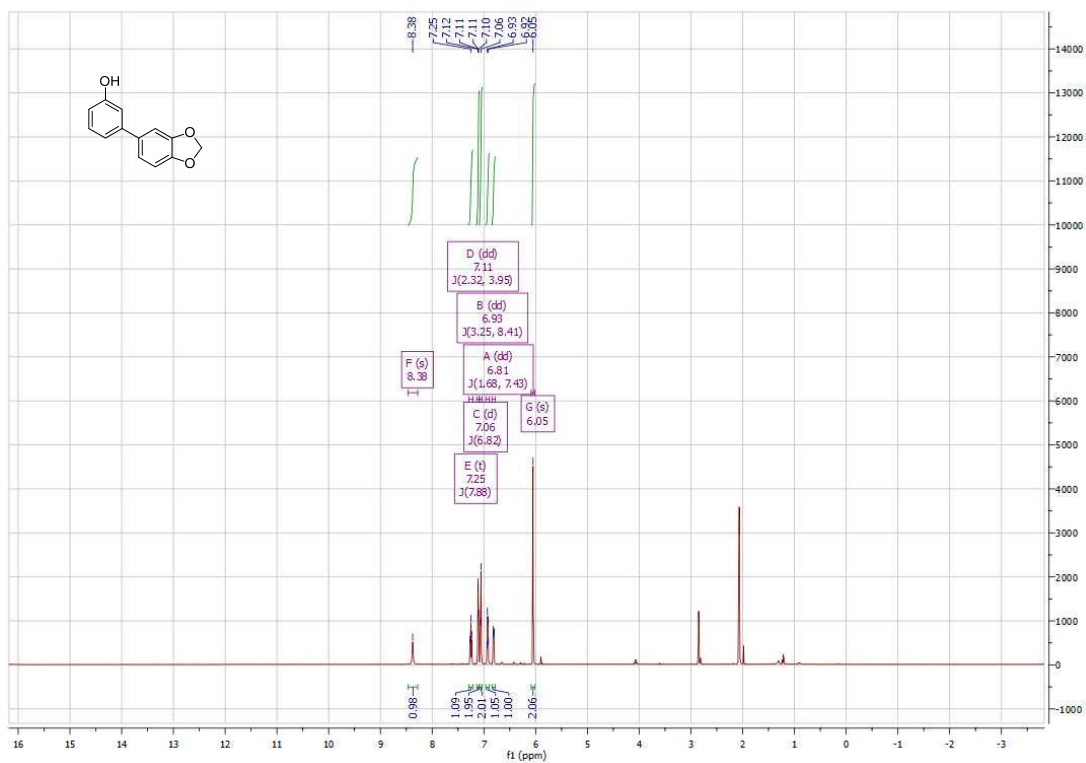

# <sup>13</sup>C NMR of (A-3)

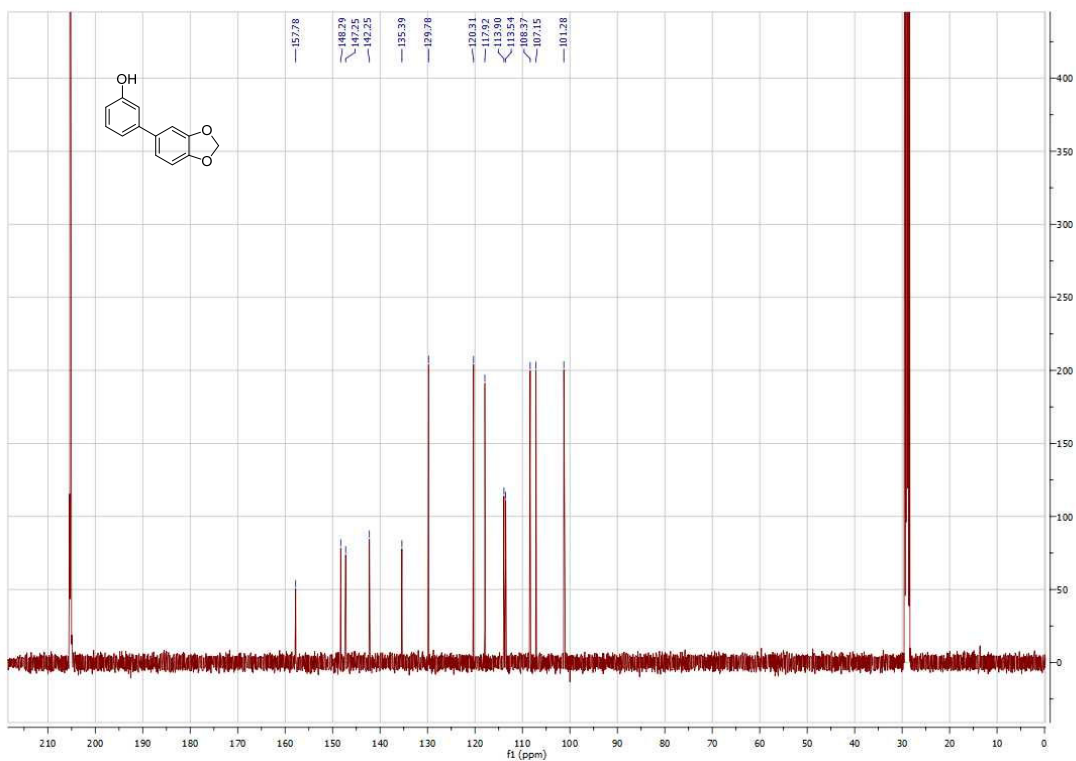

# <sup>1</sup>H NMR of (A-5)

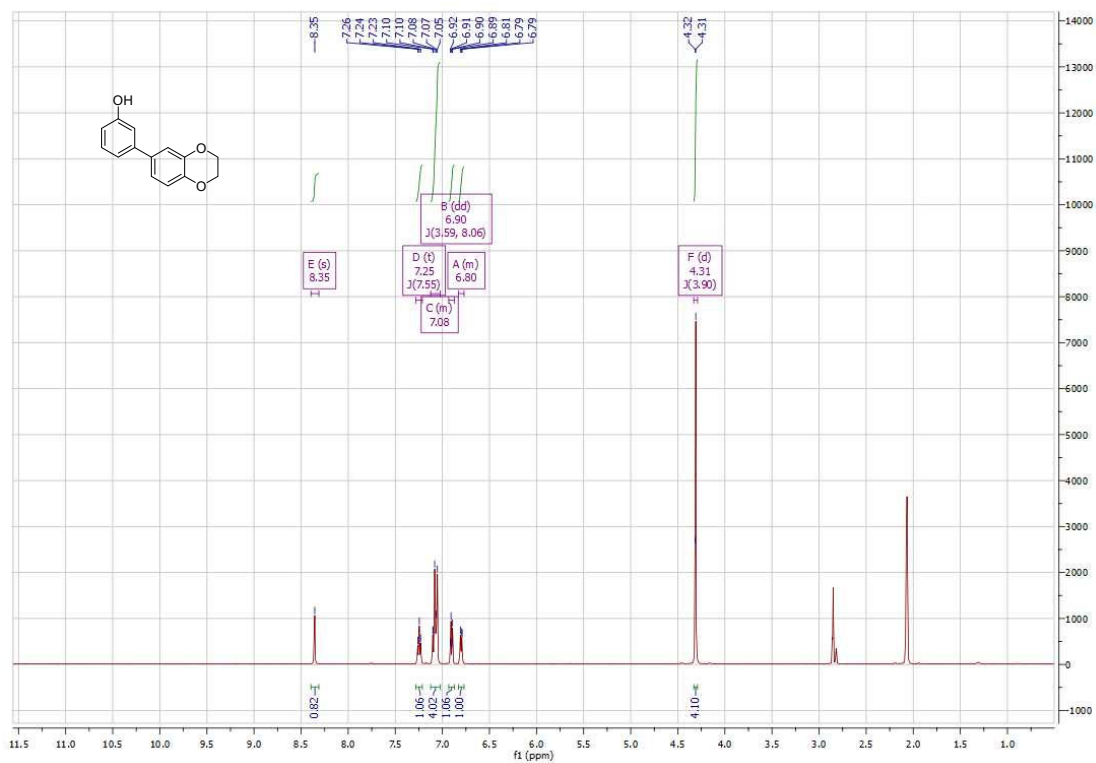

# <sup>13</sup>C NMR of (A-5)

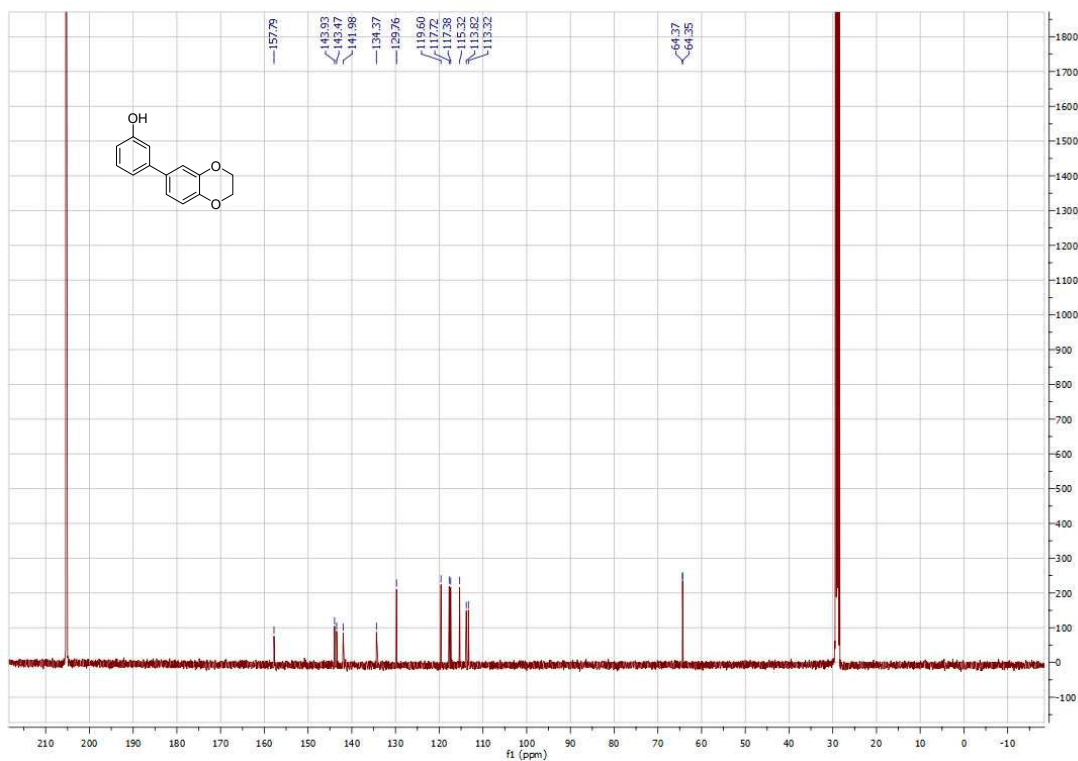

# <sup>1</sup>H NMR of (A-6)

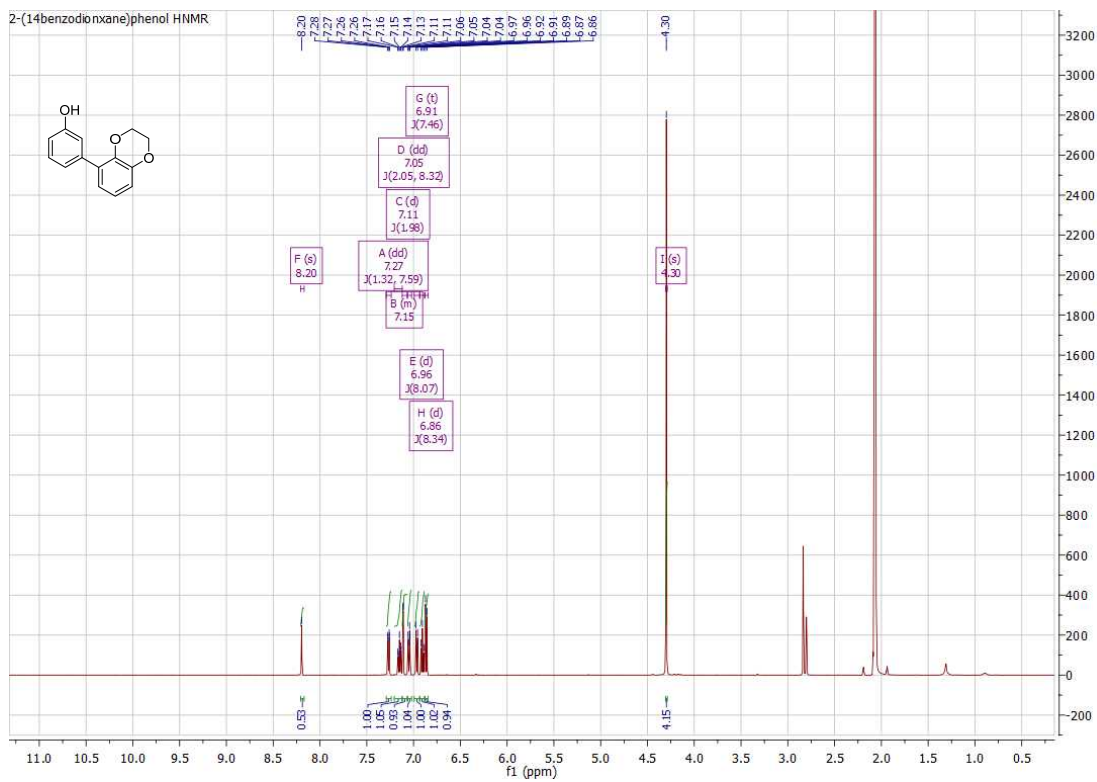

# <sup>13</sup>C NMR of (A-6)

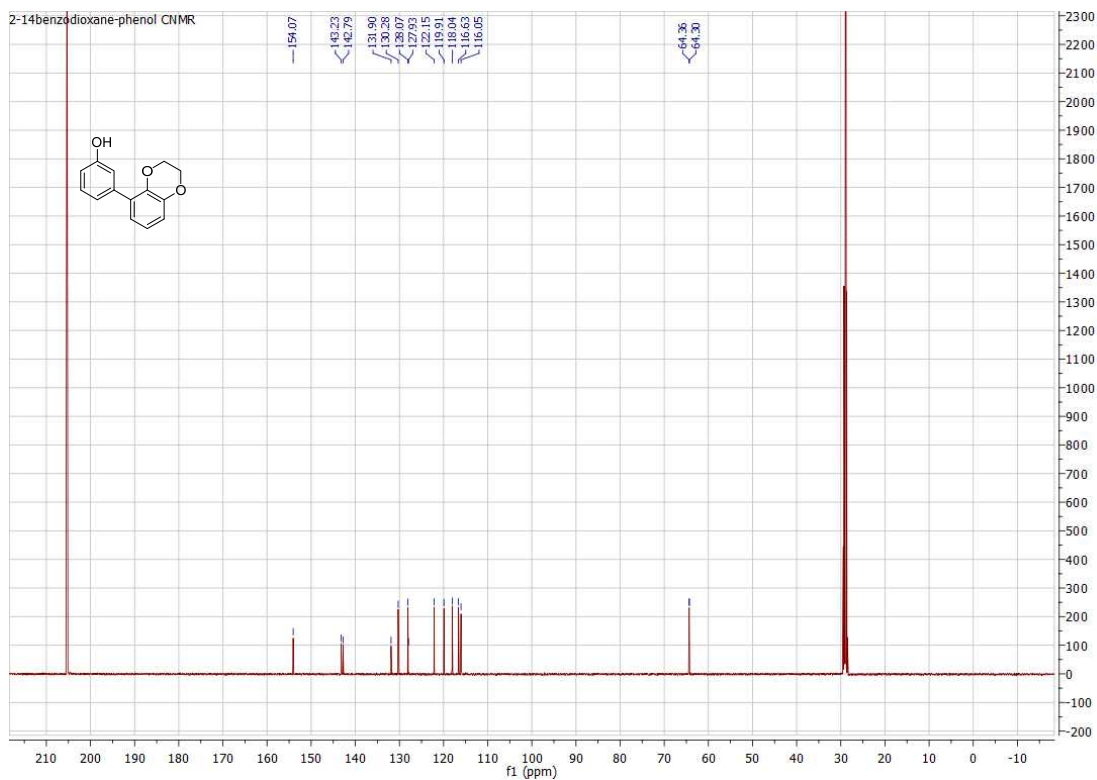

# <sup>1</sup>H NMR of (A-7)

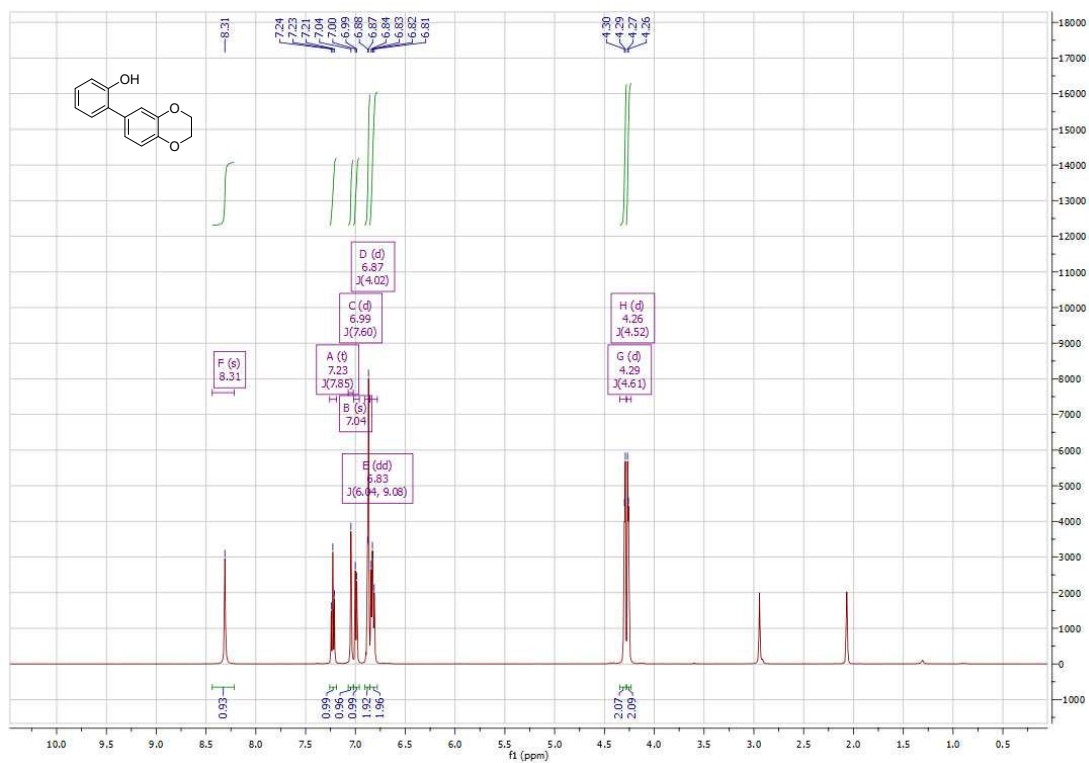

# <sup>13</sup>C NMR of (A-7)

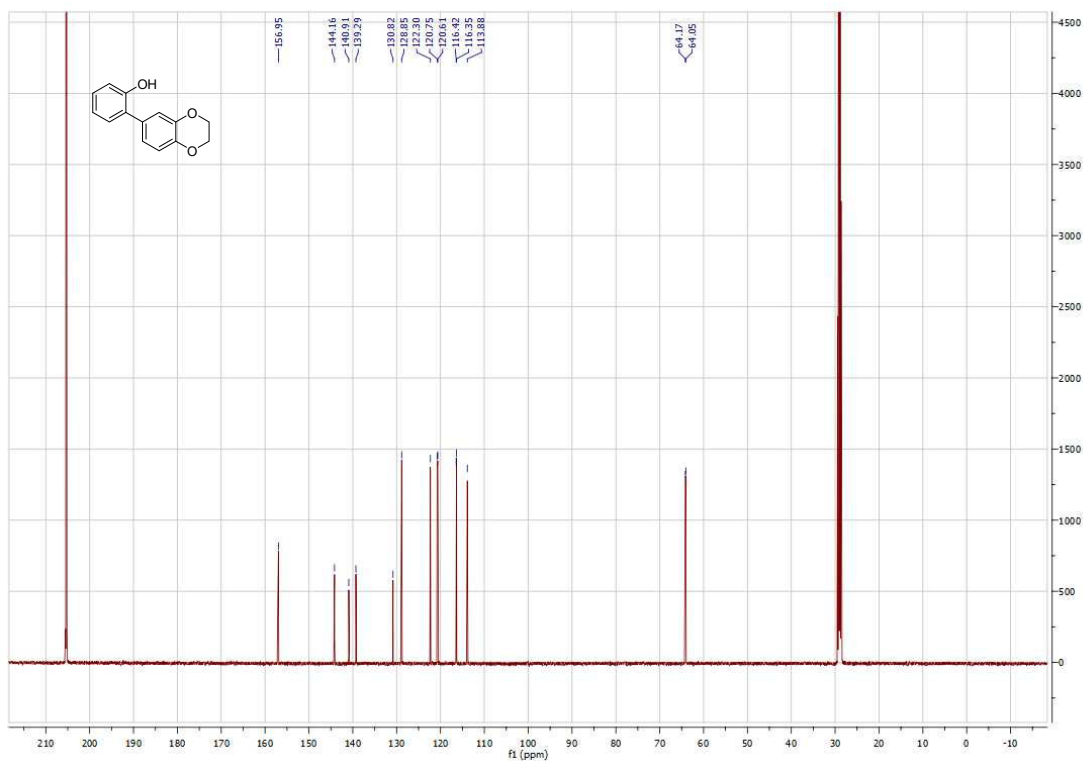

# <sup>1</sup>H NMR of (A-8)

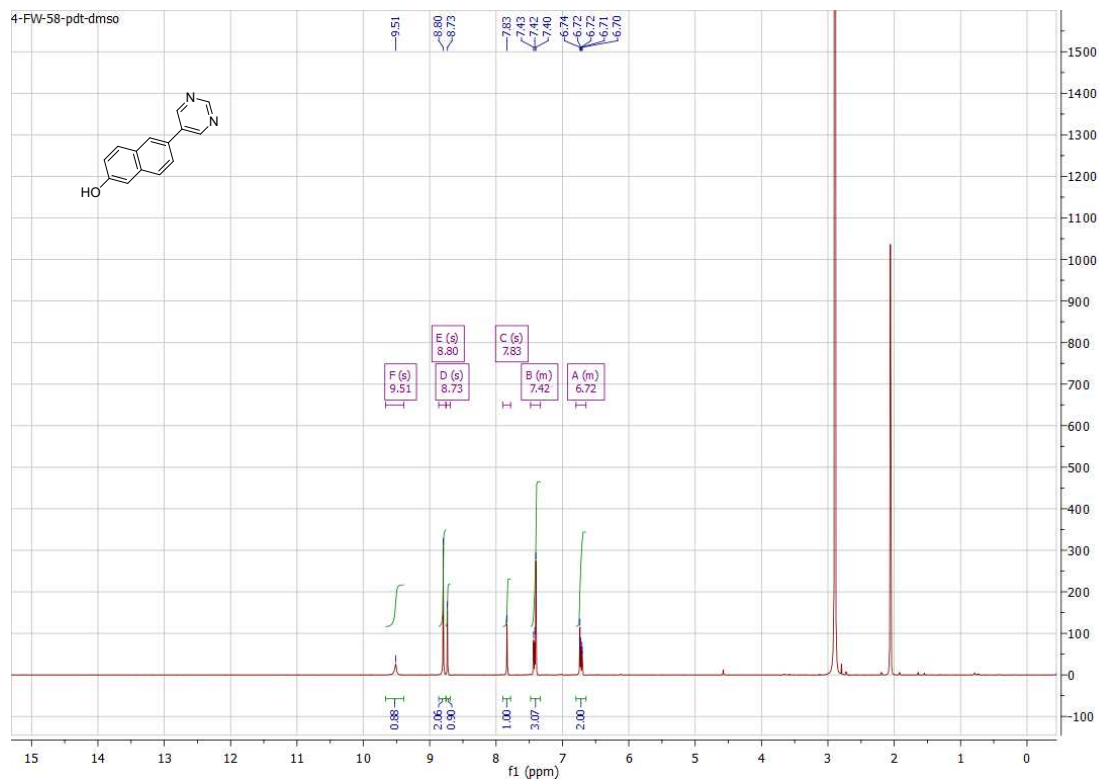

# <sup>13</sup>C NMR of (A-8)

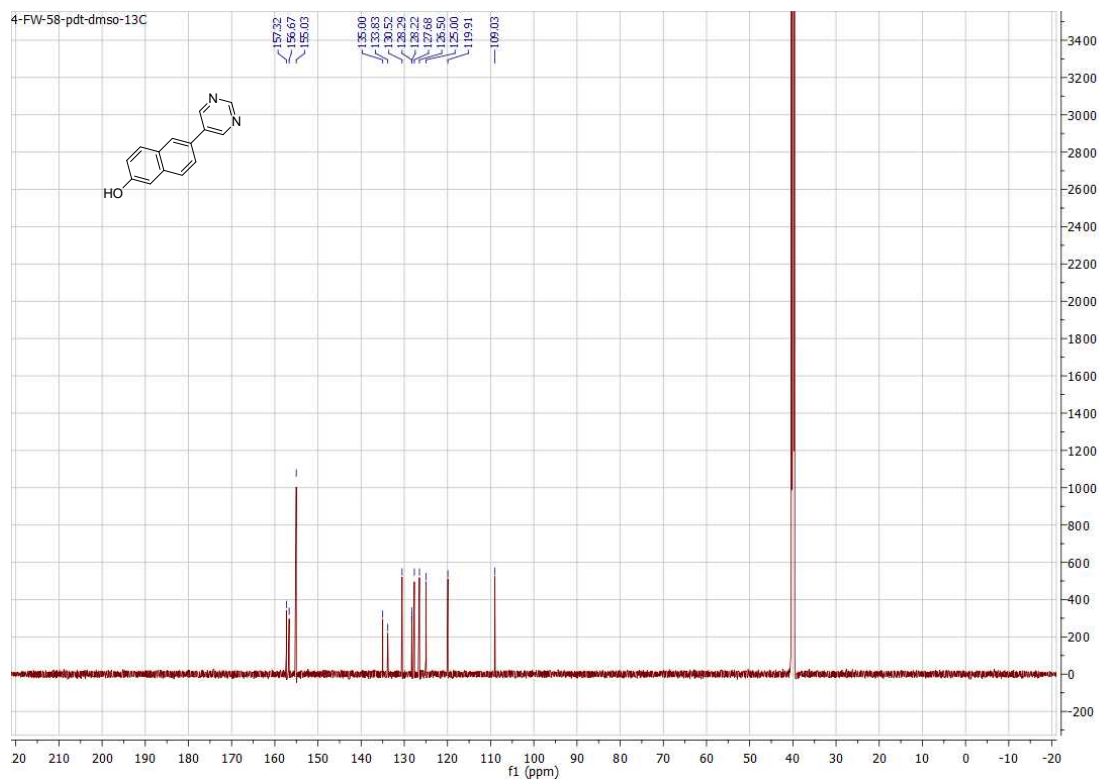

# <sup>1</sup>H NMR of (A-13)

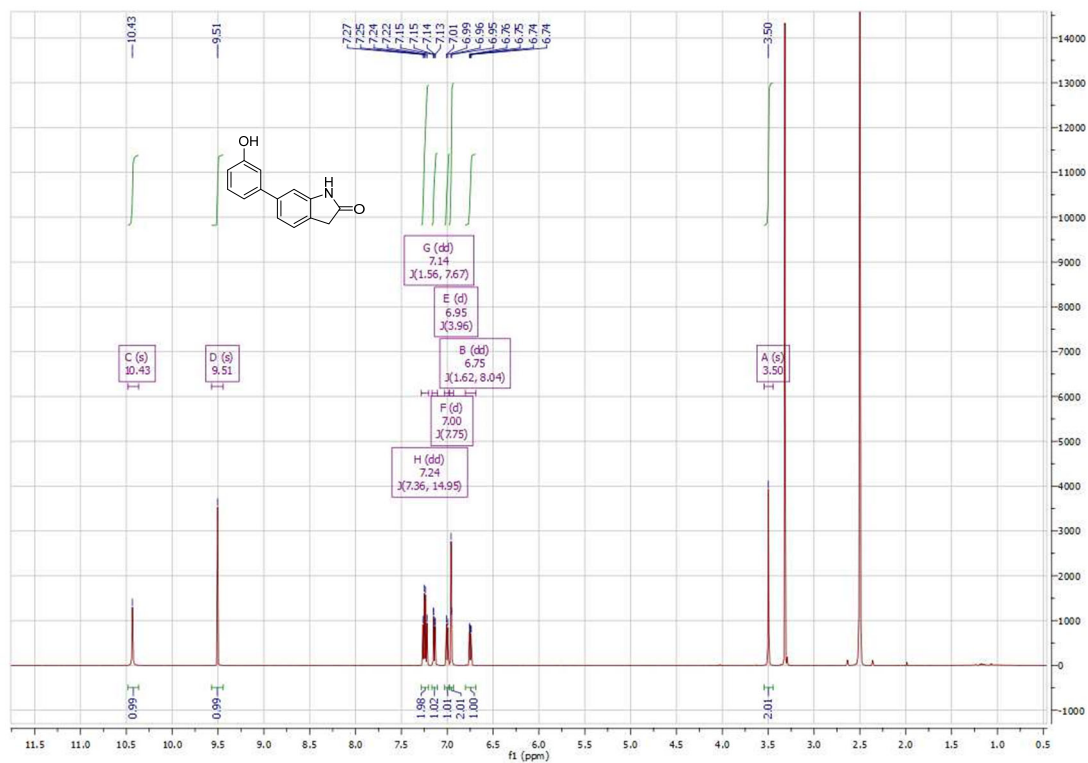

# <sup>13</sup>C NMR of (A-13)

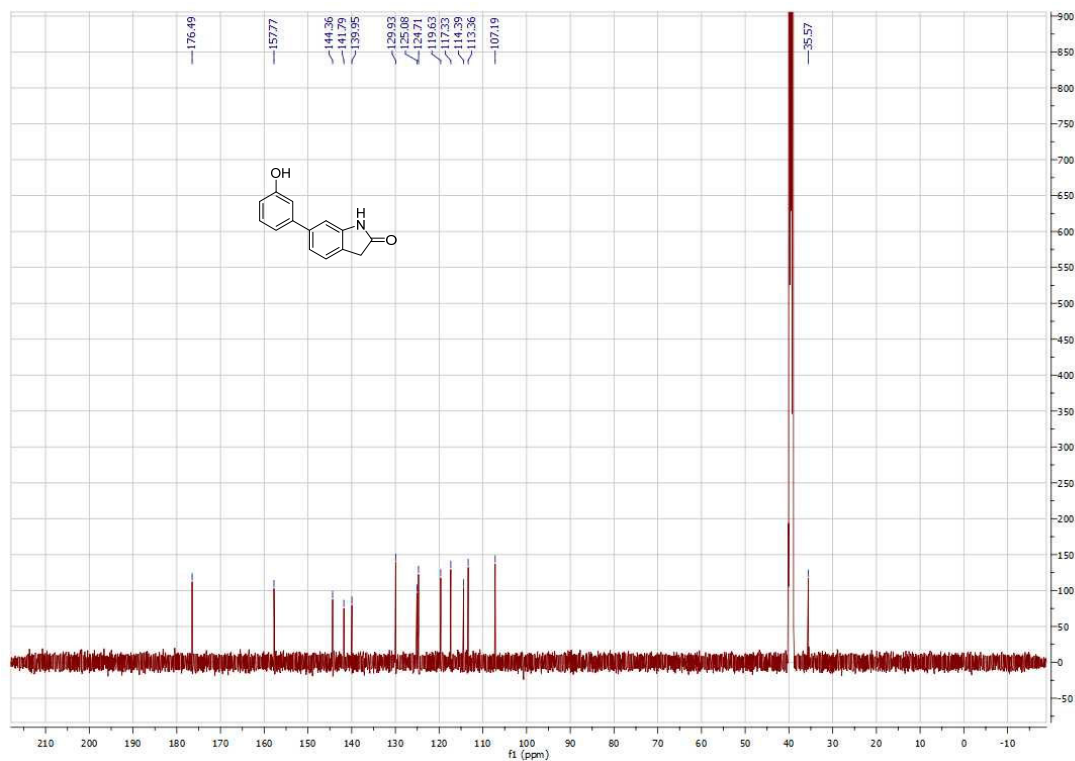



# <sup>1</sup>H NMR of (A-14)

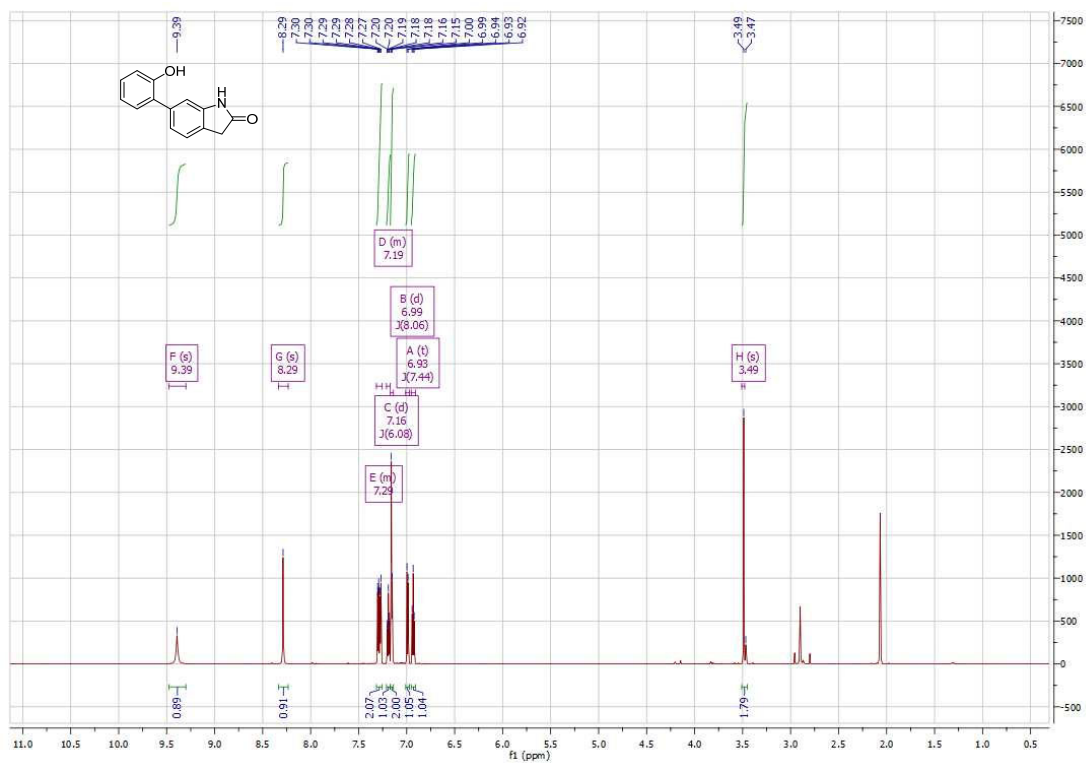

# <sup>13</sup>C NMR of (A-14)

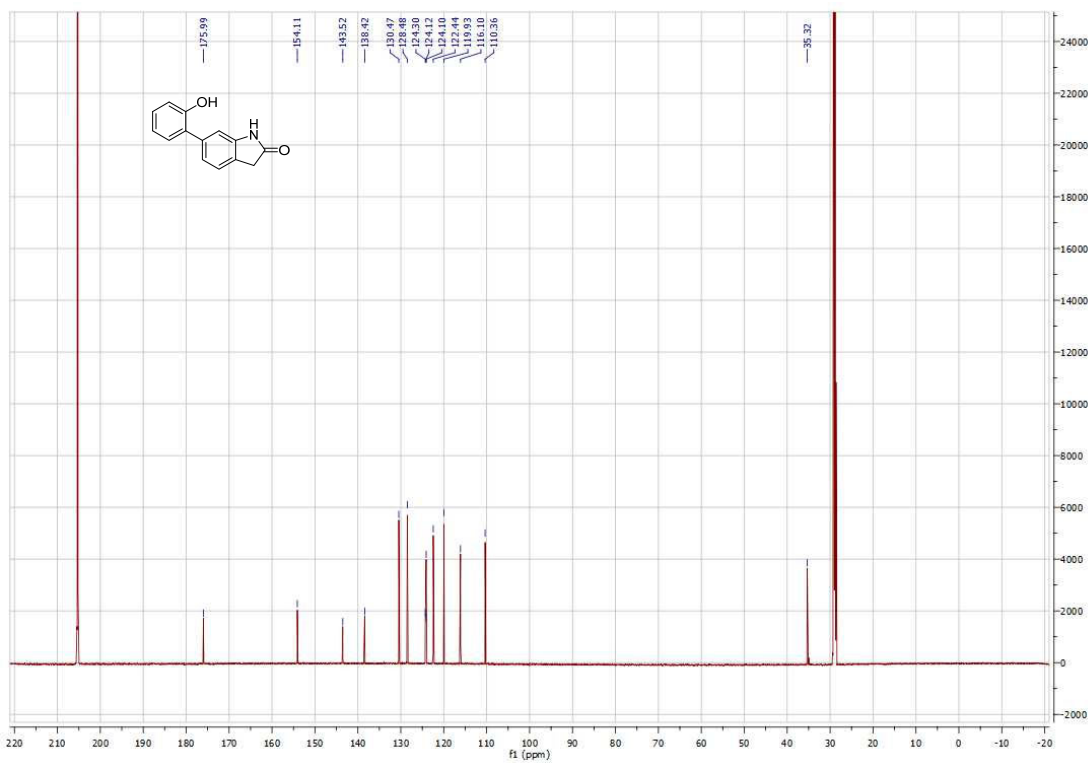

# <sup>1</sup>H NMR of (A-15)

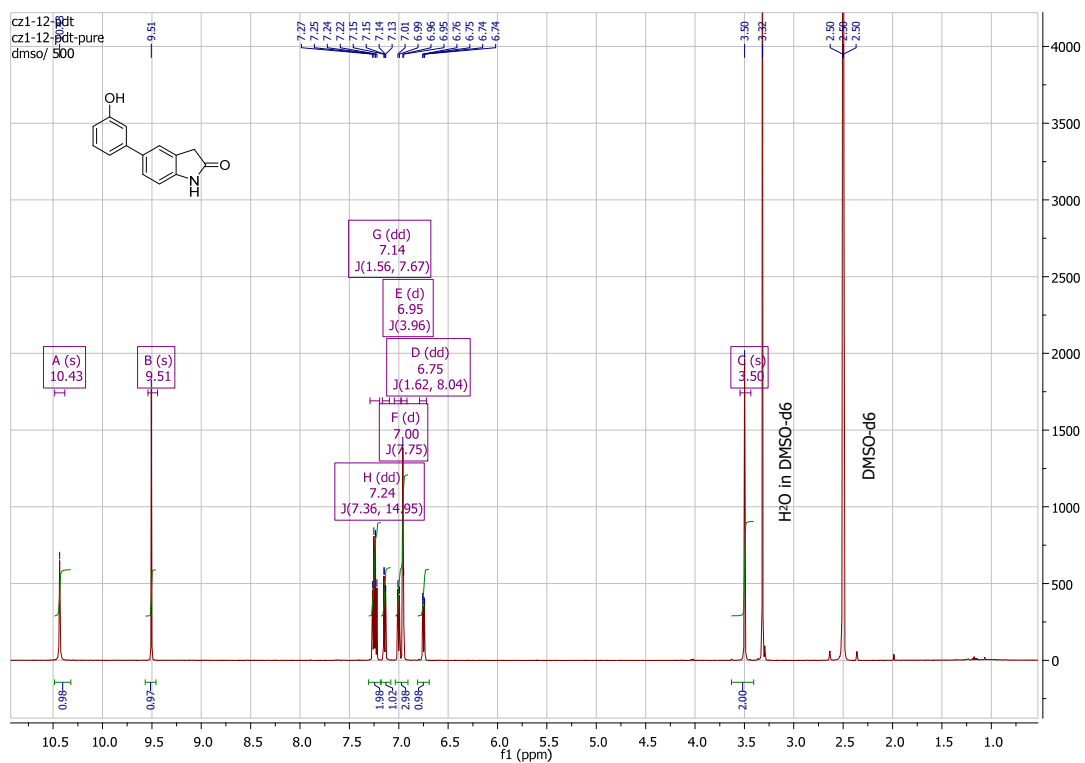

# <sup>13</sup>C NMR of (A-15)

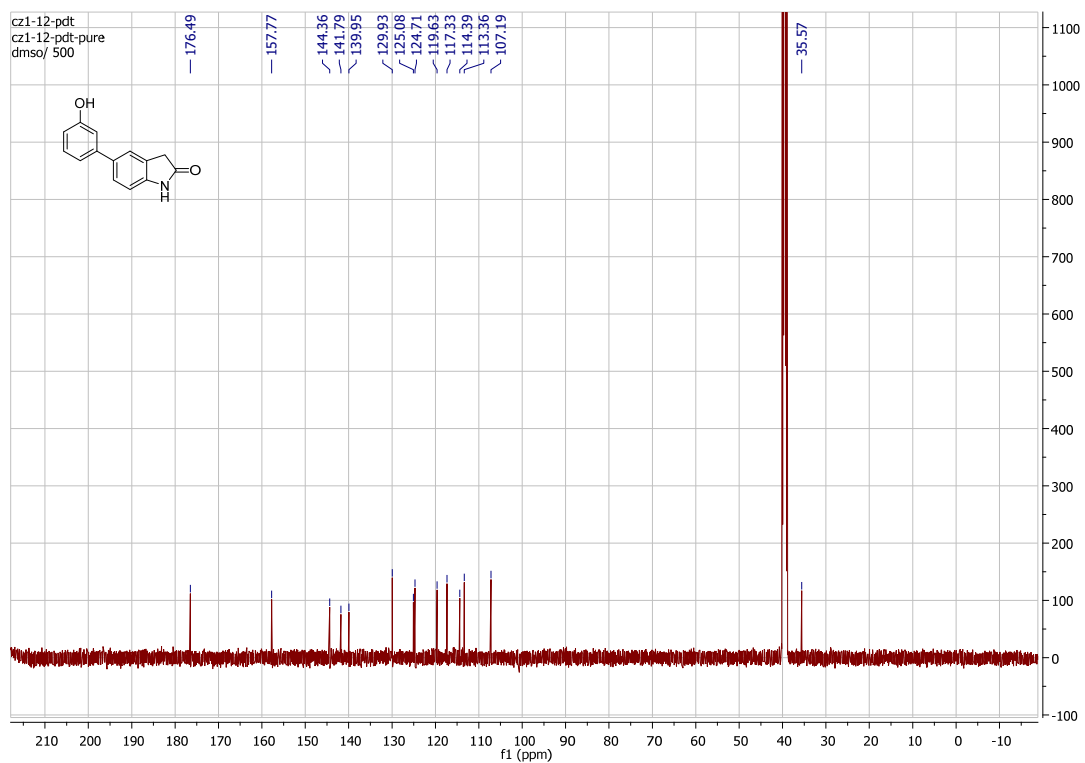

<sup>1</sup>H NMR of (A-16)

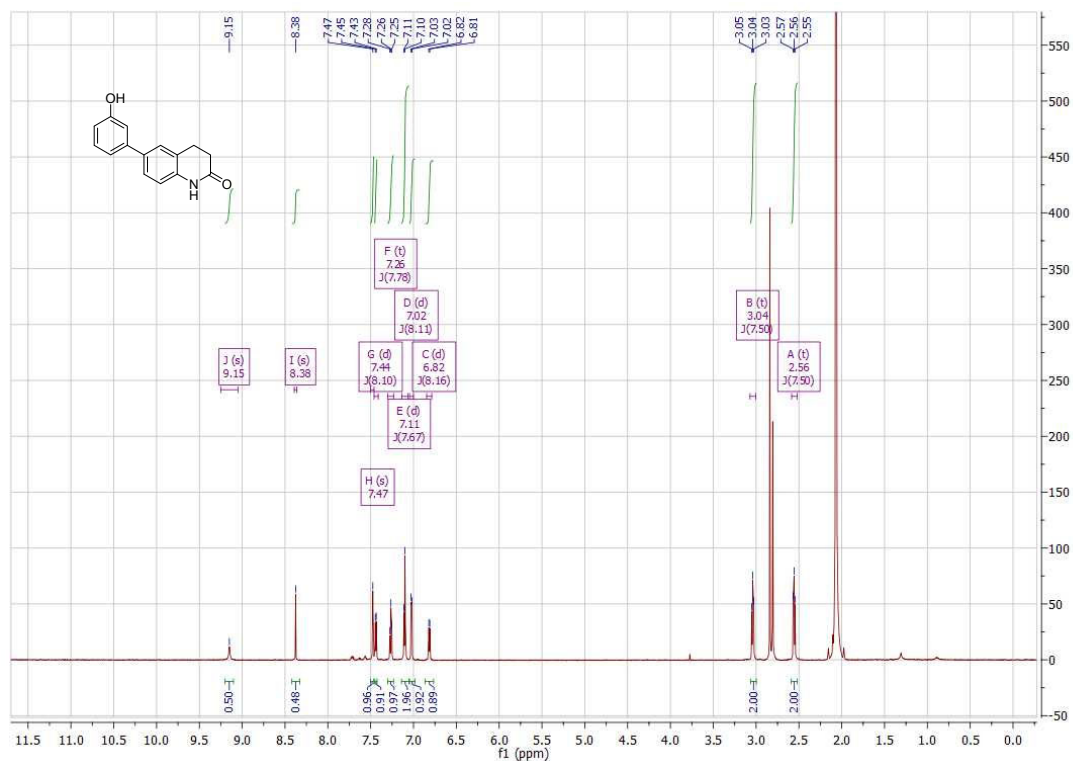

<sup>13</sup>C NMR of (A-16)

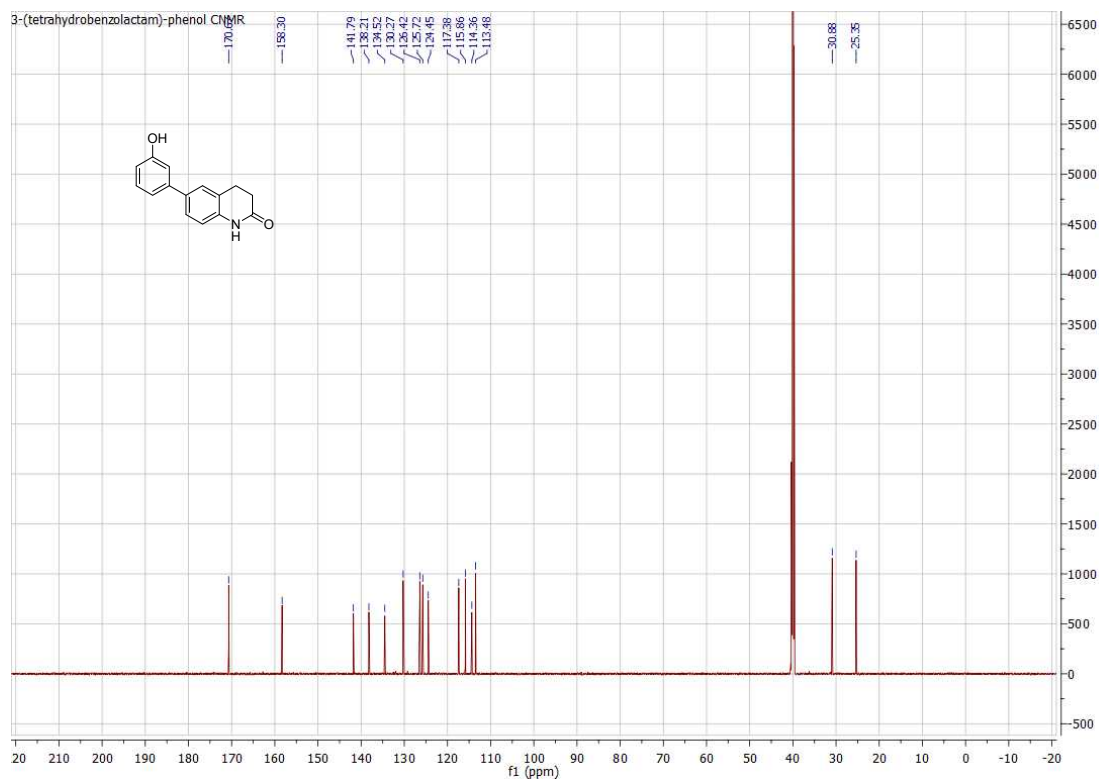

# <sup>1</sup>H NMR of (A-17)

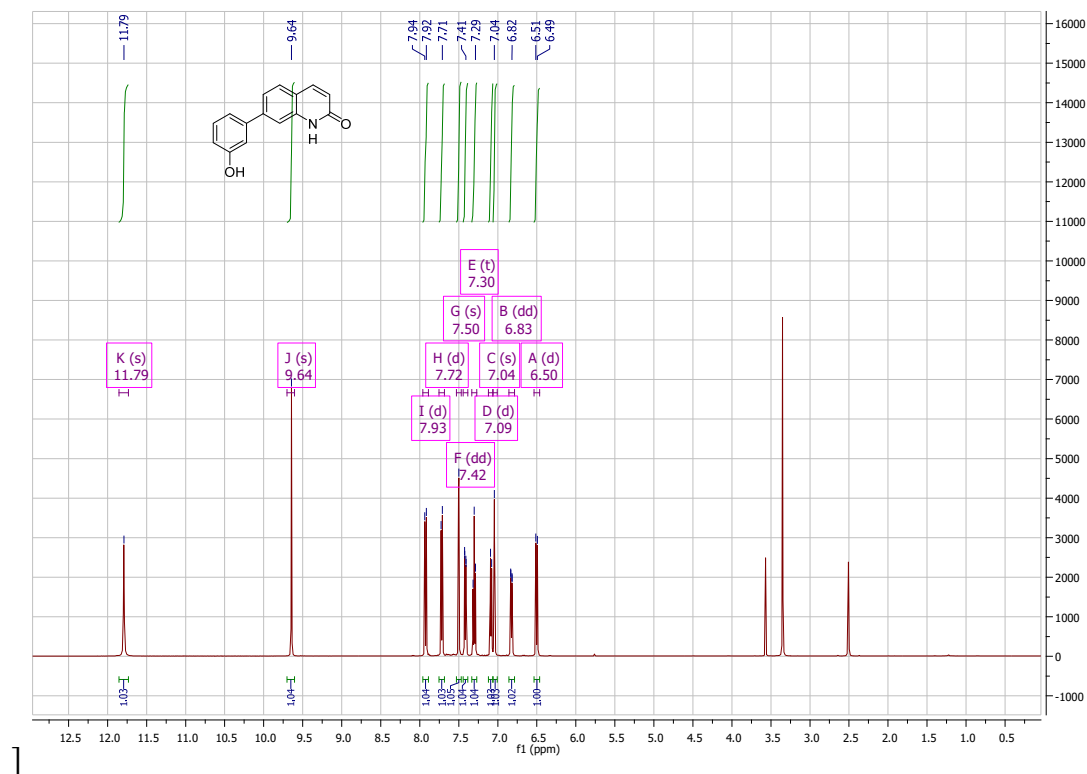

# <sup>13</sup>C NMR of (A-17)

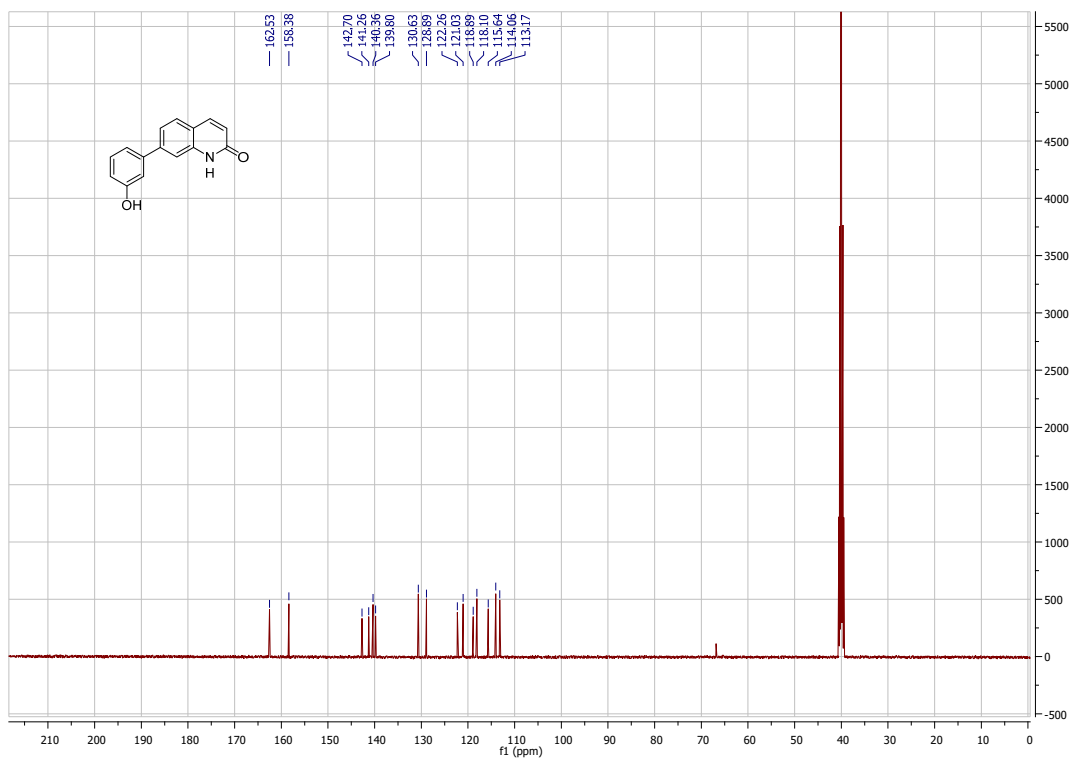

# <sup>1</sup>H NMR of (A-18)

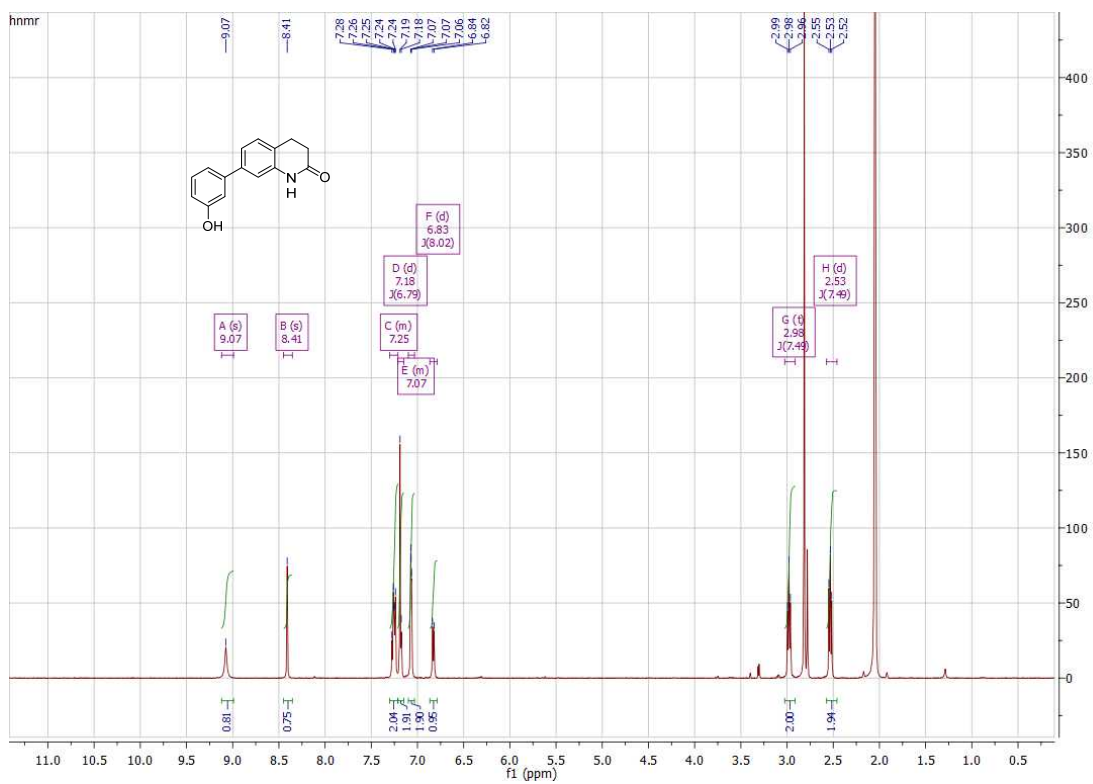

# <sup>13</sup>C NMR of (A-18)

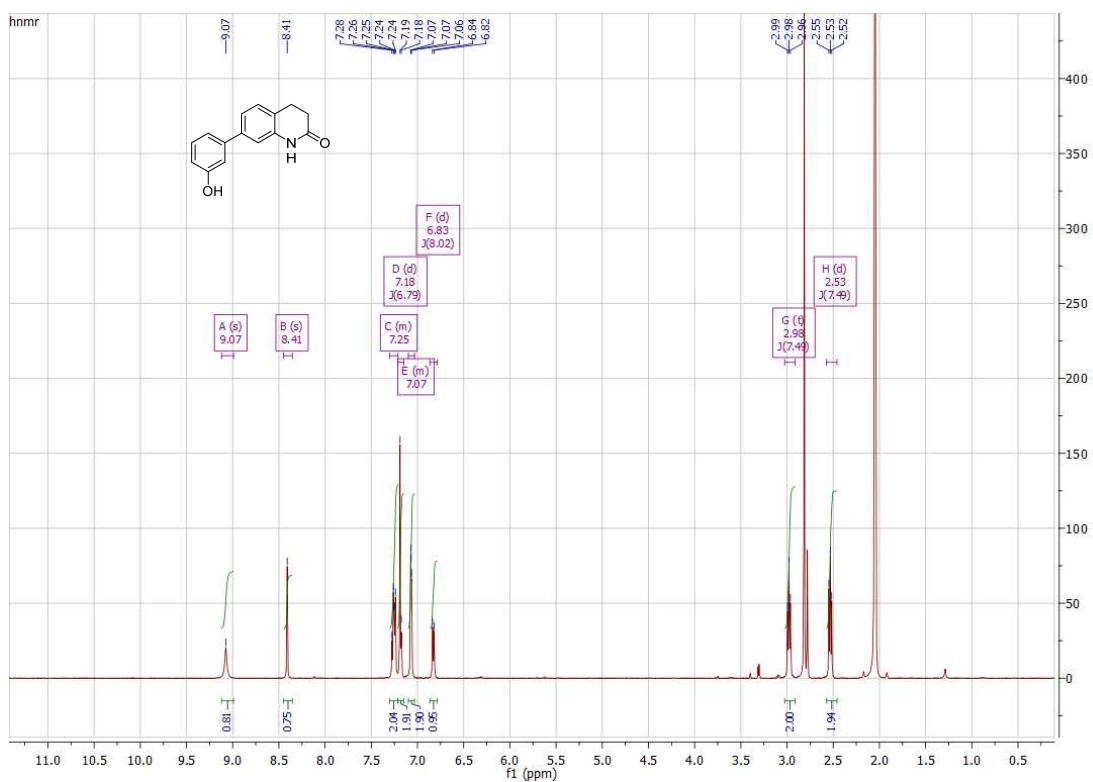

# <sup>1</sup>H NMR of (A-19)

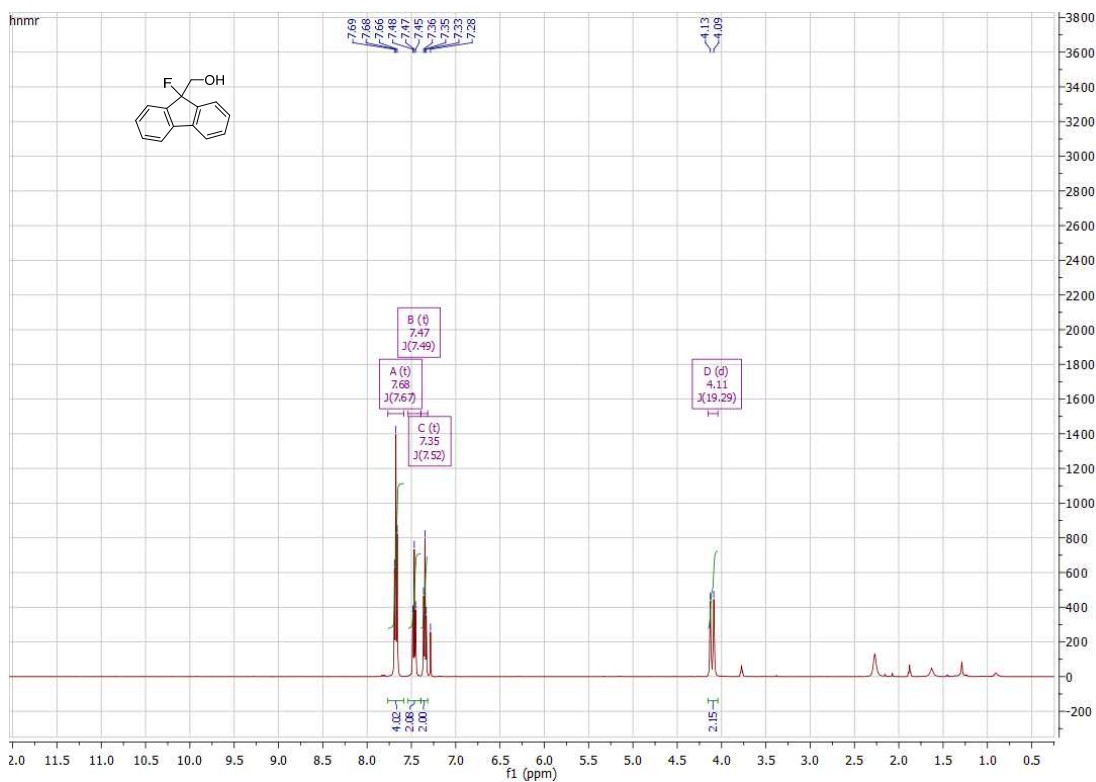

# <sup>13</sup>C NMR of (A-19)

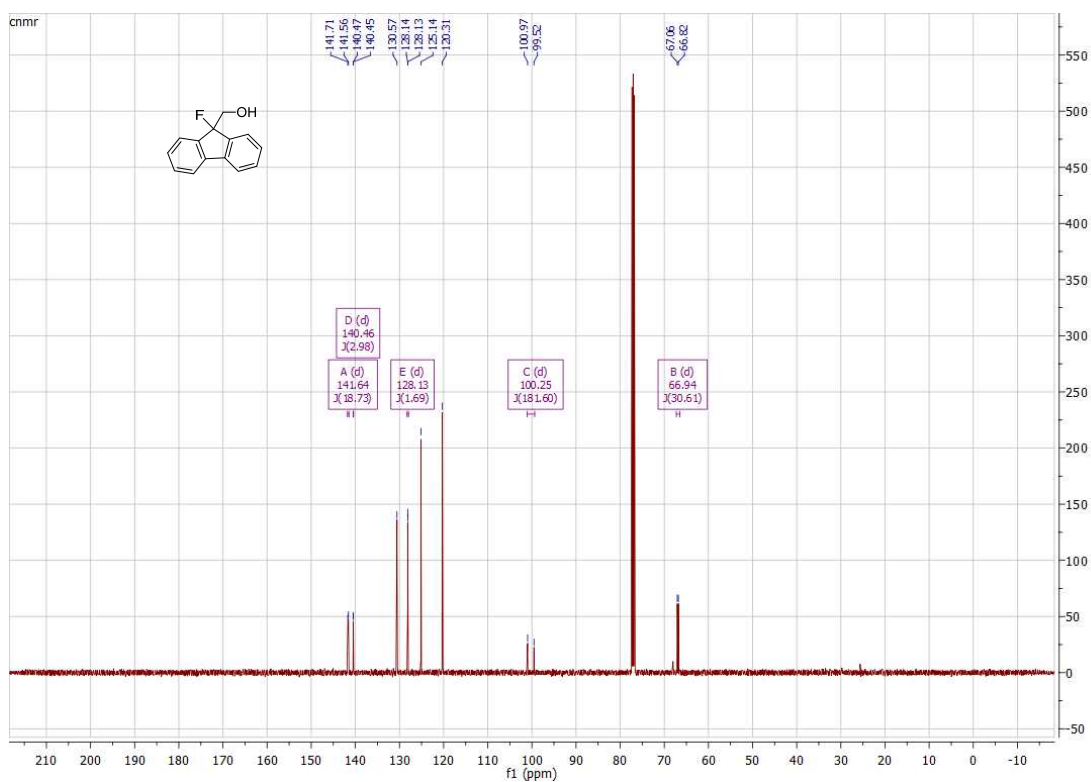

$^{19}\text{F}$  NMR of (A-20)

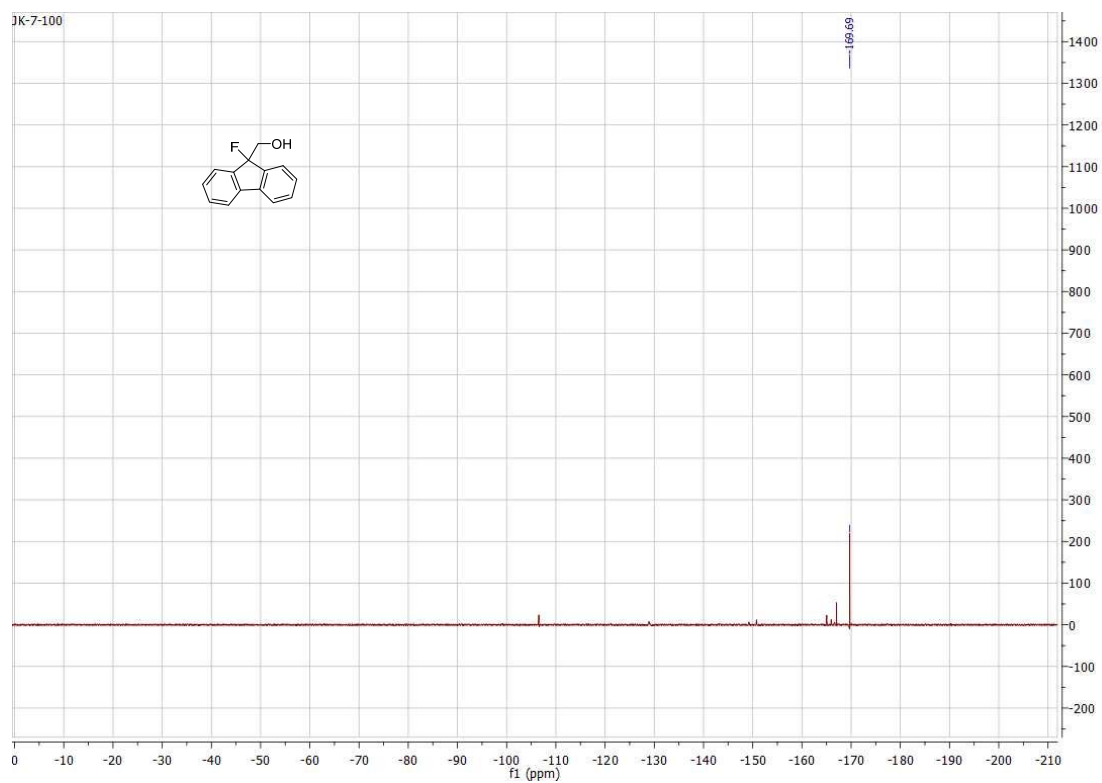

# <sup>1</sup>H NMR of (B-3)

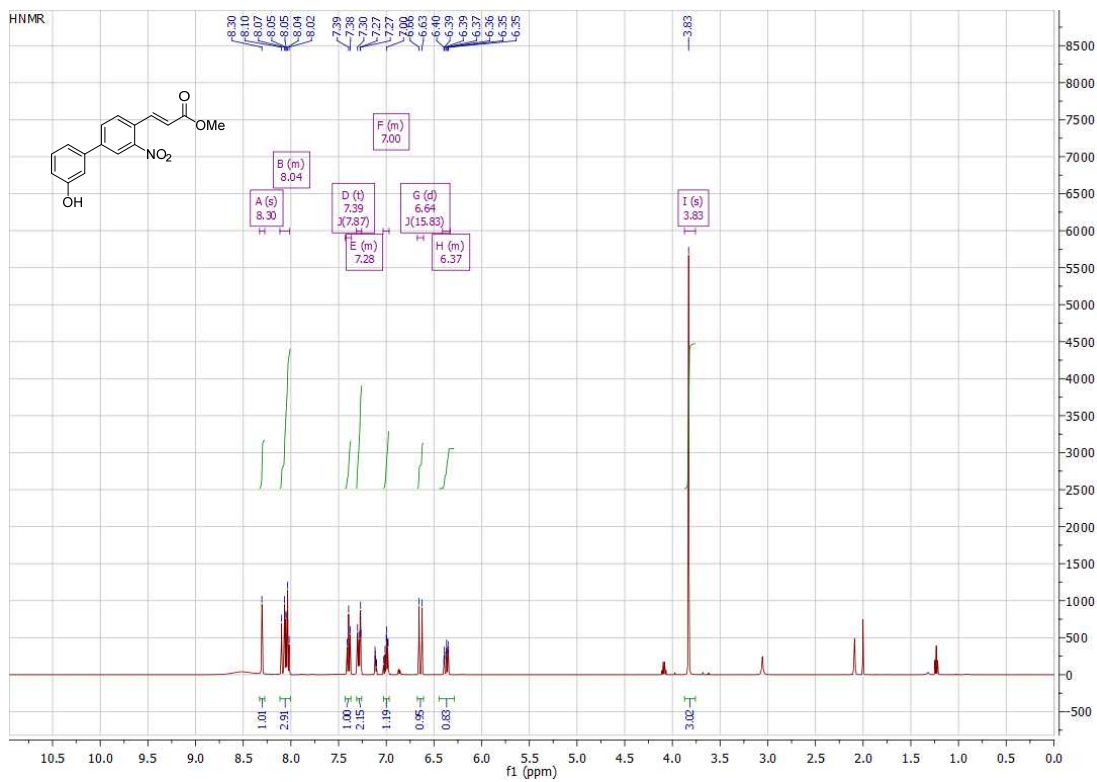

# <sup>13</sup>C NMR of (B-3)

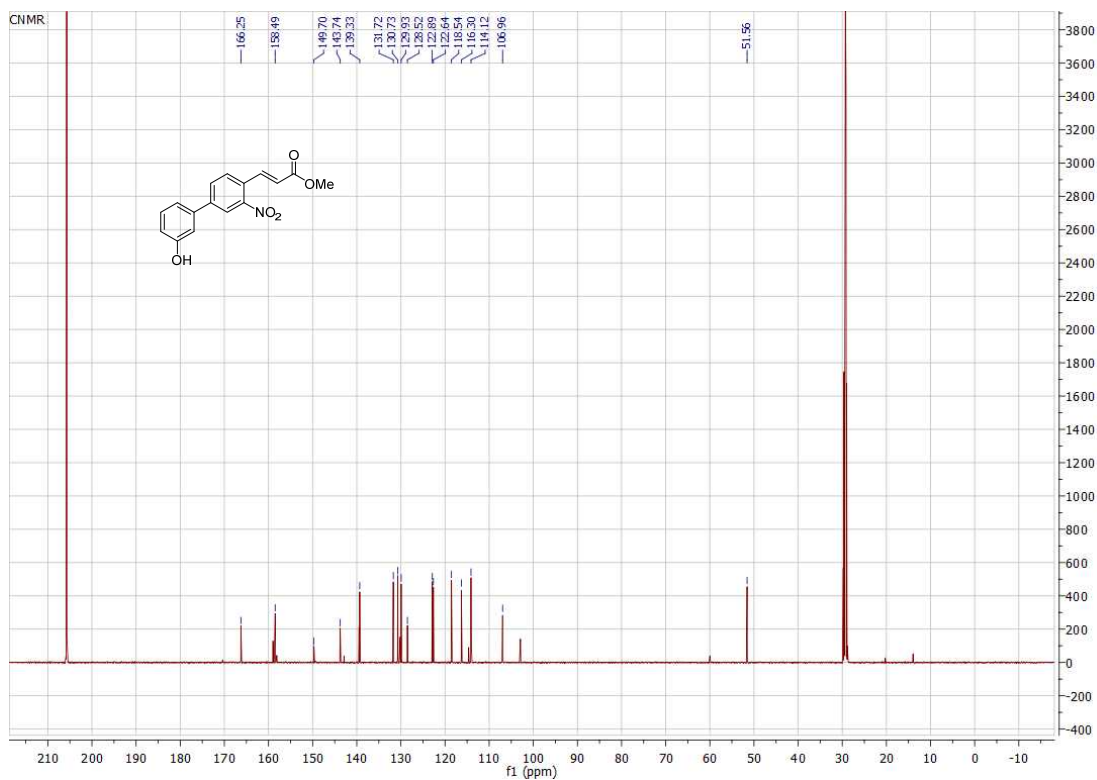



# <sup>1</sup>H NMR of (B-5)

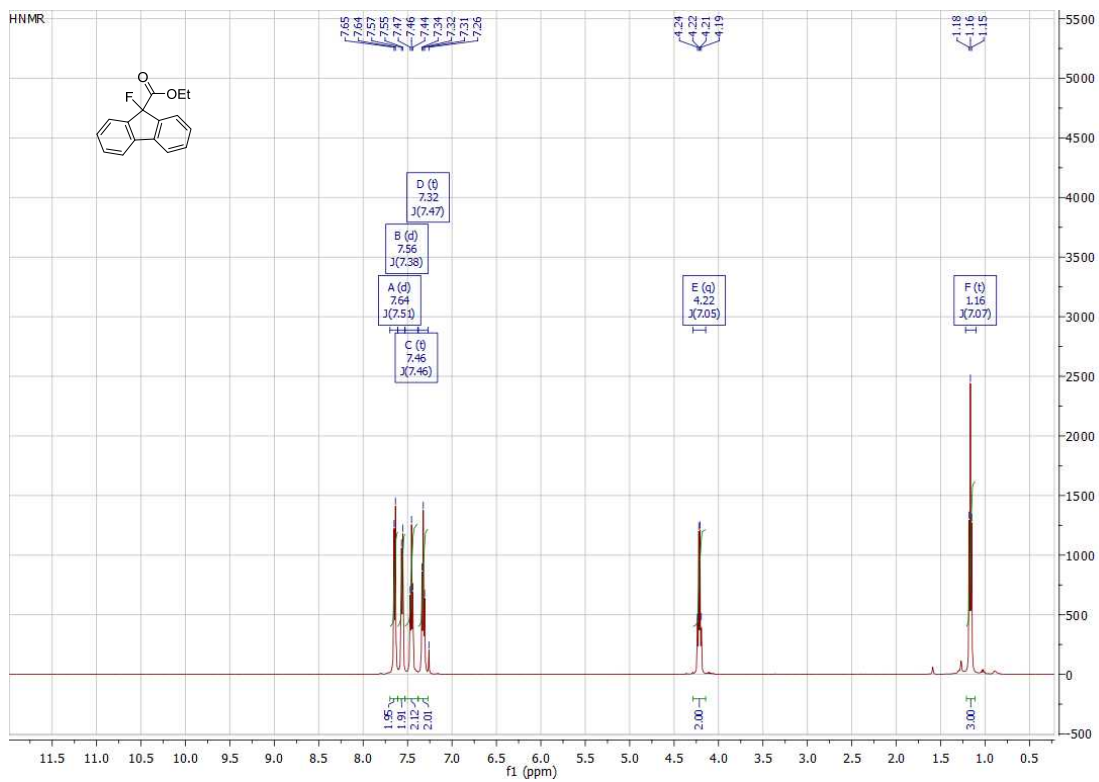

# <sup>13</sup>C NMR of (B-5)

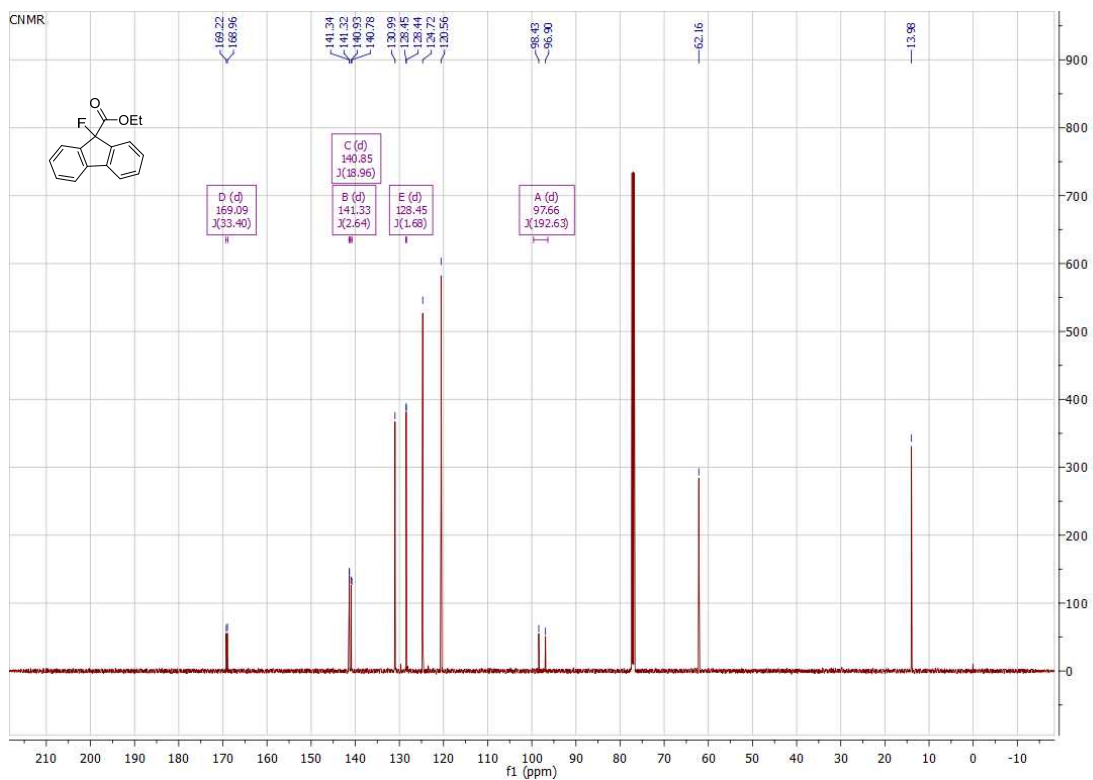

$^{19}\text{F}$  NMR of (B-5)

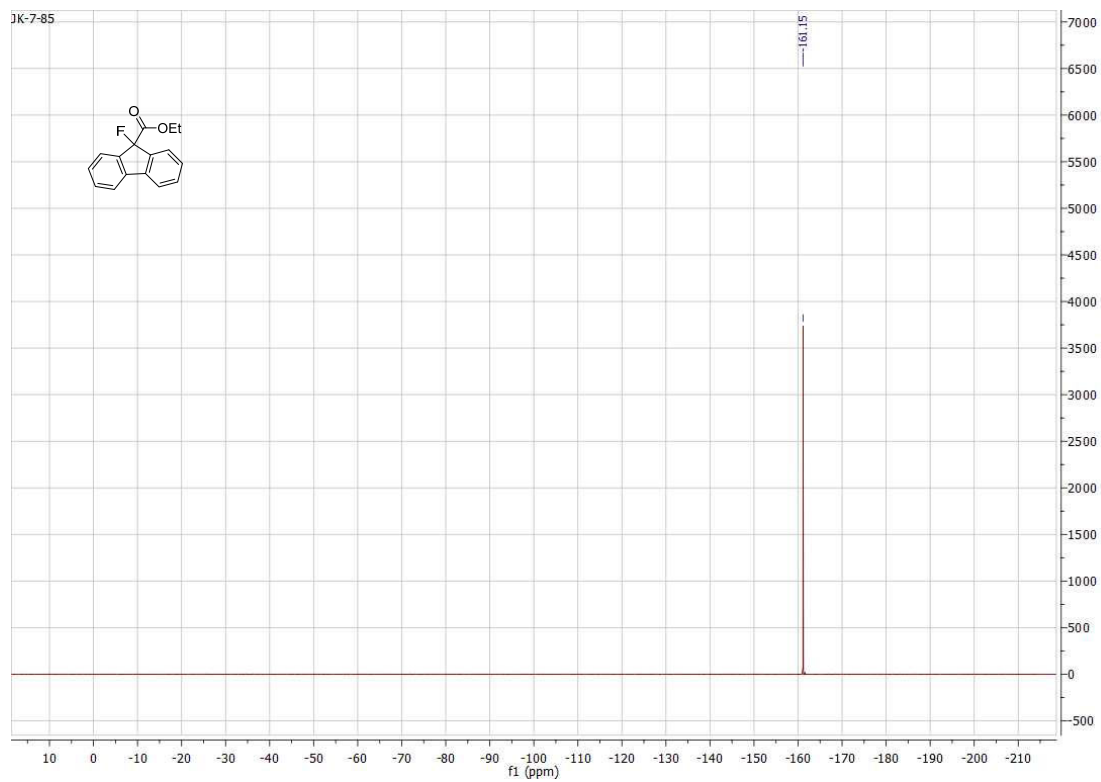

## HPLC purities of the five compounds examined *in vivo*

### (1) $\alpha$ -1 (97.6%)

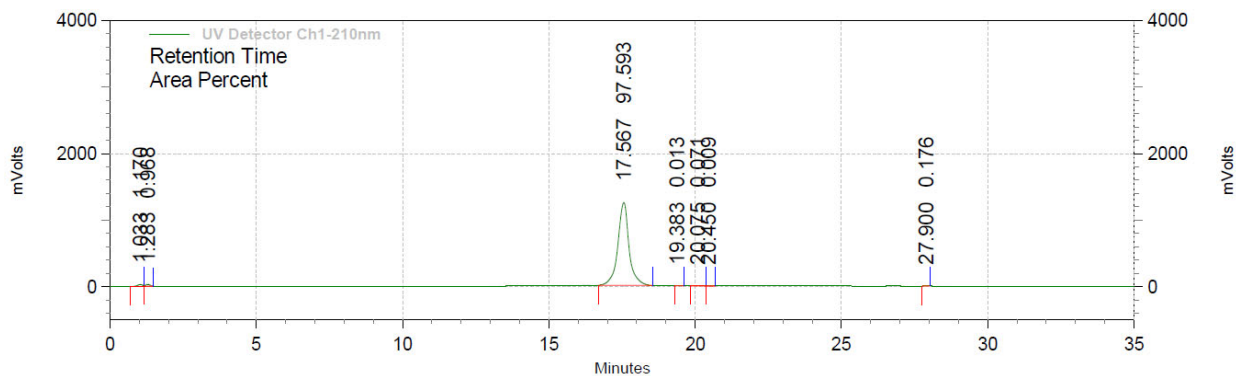

Condition (5) (Shimadzu LC-2010A): Kinetex F5, 2.6  $\mu$ m, 100  $\text{\AA}$ , 100 x 4.6 mm column, solvent A: H<sub>2</sub>O, solvent B: CH<sub>3</sub>CN, flow rate: 1.0 mL/min, t: 0-35 min, gradient: 5-95% solvent B, 25  $^{\circ}$ C.

### (2) $\alpha$ -4 (95.8%)

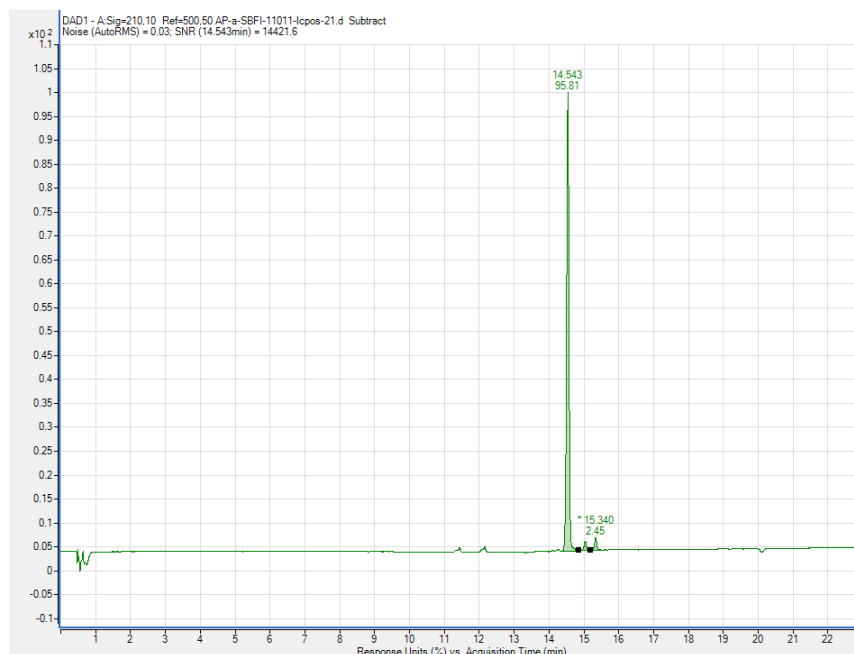

Condition (1) (Agilent 1100): Kinetex evoc18, 2.6  $\mu$ m, 100  $\text{\AA}$ , 100 x 2.1 mm column, solvent A: H<sub>2</sub>O (5 mM ammonium acetate, pH 7), solvent B: CH<sub>3</sub>CN/H<sub>2</sub>O, 9:1 (5 mM ammonium acetate, pH 7), flow rate: 0.50 mL/min, t: 0-30 min, gradient: 5-100% solvent B, 45  $^{\circ}$ C.

(3)  **$\alpha$ -16** (99.1%)

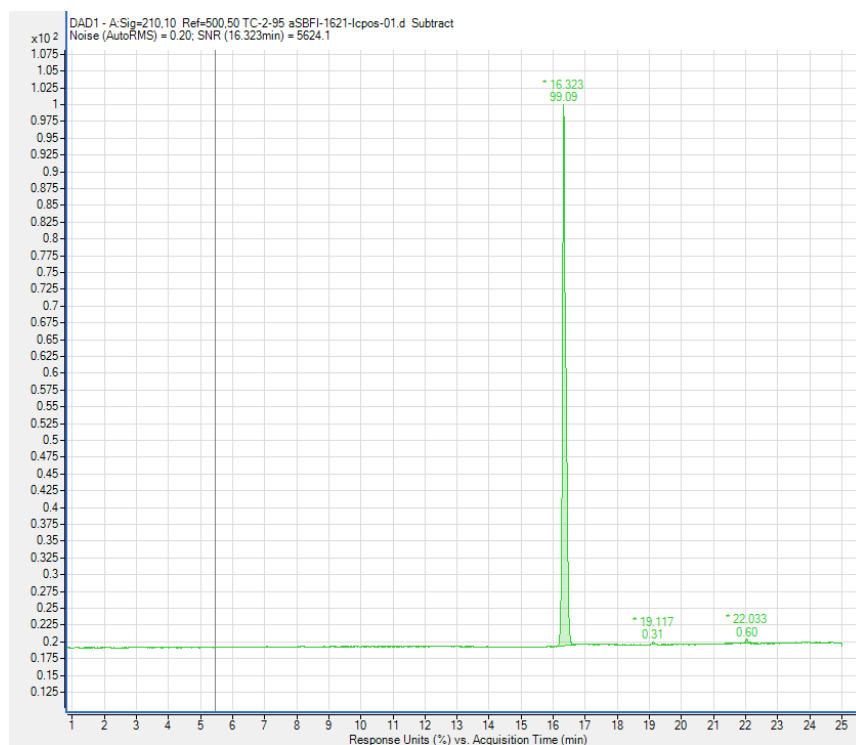

Condition (2) (Agilent 1100): Kinetex F5, 2.7  $\mu\text{m}$ , 100  $\text{\AA}$ , 100 x 2.1 mm column, solvent A: H<sub>2</sub>O (10 mM ammonium acetate), solvent B: CH<sub>3</sub>CN/H<sub>2</sub>O, 95:5 (10mM ammonium acetate), flow rate: 0.50 mL/min, t: 0-46 min, gradient: 5-95% solvent B, 45 °C.

(4)  **$\gamma$ -3** (99.2%)

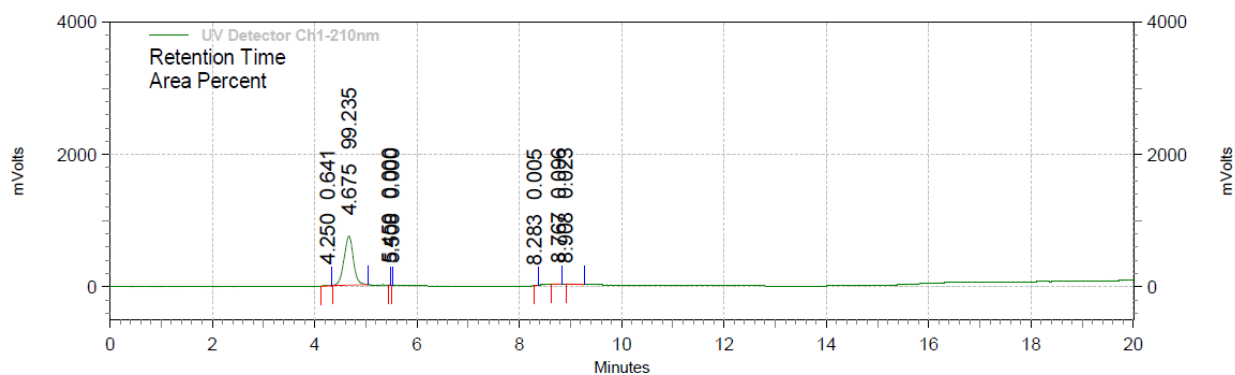

Condition (5) (Shimadzu LC-2010A): Kinetex F5, 2.6  $\mu\text{m}$ , 100  $\text{\AA}$ , 100 x 4.6 mm column, solvent A: H<sub>2</sub>O, solvent B: CH<sub>3</sub>CN, flow rate: 1.0 mL/min, t: 0-20 min, gradient: 5-95% solvent B, 25 °C.

(5)  $\gamma$ -9 (96.5%)

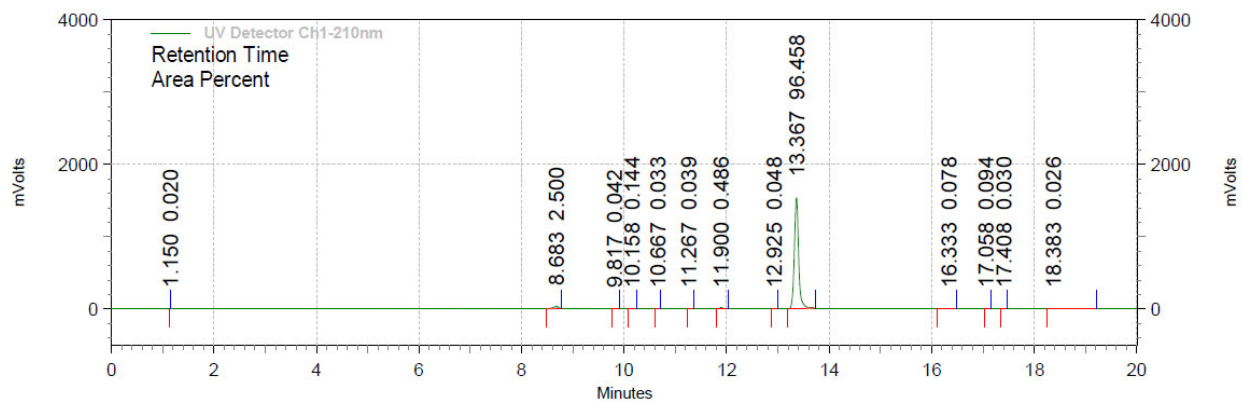

Condition (5) (Shimadzu LC-2010A): Kinetex F5, 2.6  $\mu$ m, 100  $\text{\AA}$ , 100 x 4.6 mm column, solvent A: H<sub>2</sub>O, solvent B: CH<sub>3</sub>CN, flow rate: 1.0 mL/min, t: 0-20 min, gradient: 5-95% solvent B, 25  $^{\circ}$ C.

**Examples of the HPLC purities of other compounds examined *in vitro* for affinities to FABP3, 5 and 7**

**$\alpha$ -3 (96.0%)**

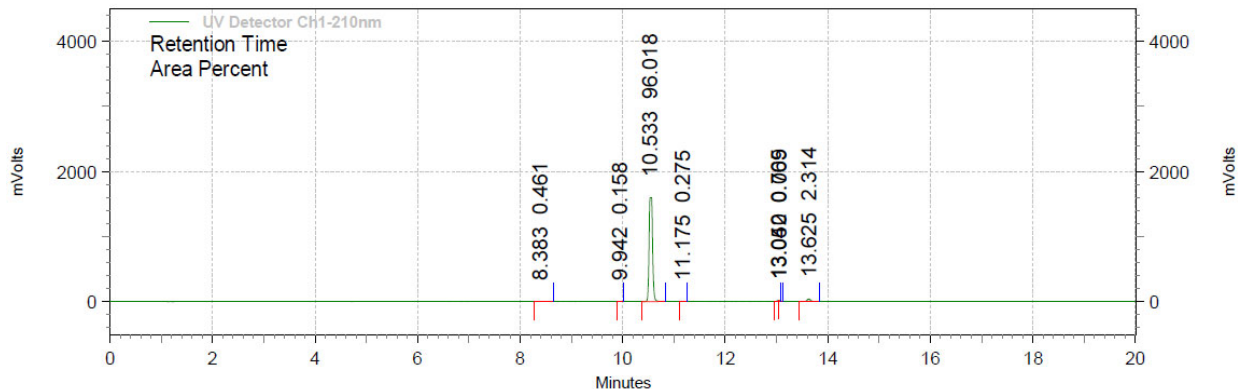

Condition (5) (Shimadzu LC-2010A): Kinetex F5, 2.6  $\mu$ m, 100  $\text{\AA}$ , 100 x 4.6 mm column, solvent A: H<sub>2</sub>O, solvent B: CH<sub>3</sub>CN, flow rate: 1.0 mL/min, t: 0-20 min, gradient: 5-95% solvent B, 25  $^{\circ}$ C.

**$\alpha$ -6 (99.0%)**

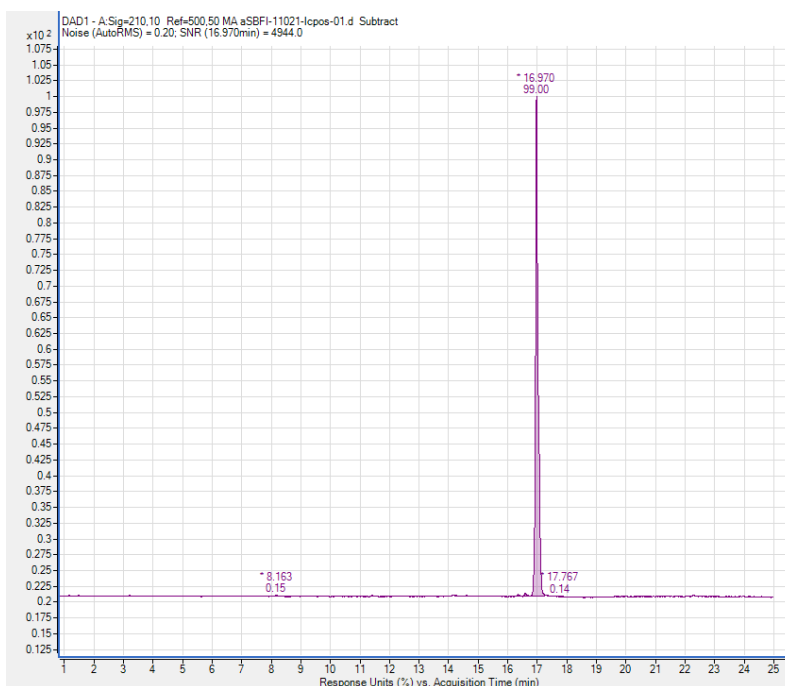

Conditions (1) (Agilent 1100): Kinetex evoc18, 2.6  $\mu$ m, 100  $\text{\AA}$ , 100 x 2.1 mm column, solvent A: H<sub>2</sub>O (5 mM ammonium acetate, pH 7), solvent B: CH<sub>3</sub>CN/H<sub>2</sub>O, 9:1 (5 mM ammonium acetate, pH 7), flow rate: 0.50 mL/min, t: 0-30 min, gradient: 5-100% solvent B, 45  $^{\circ}$ C.

**$\alpha$ -TAMSE-1 (96.0%)**

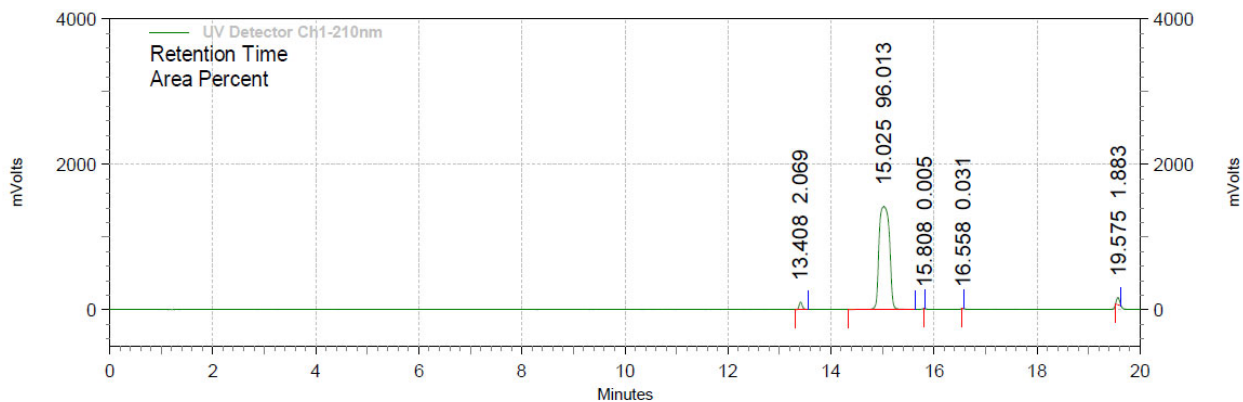

Condition (5) (Shimadzu LC-2010A): Kinetex F5, 2.6  $\mu$ m, 100  $\text{\AA}$ , 100 x 4.6 mm column, solvent A: H<sub>2</sub>O, solvent B: CH<sub>3</sub>CN, flow rate: 1.0 mL/min, t: 0-20 min, gradient: 5-95% solvent B, 25  $^{\circ}$ C.

**$\alpha$ -2-MeO-TAMSE-1 (99.2%)**

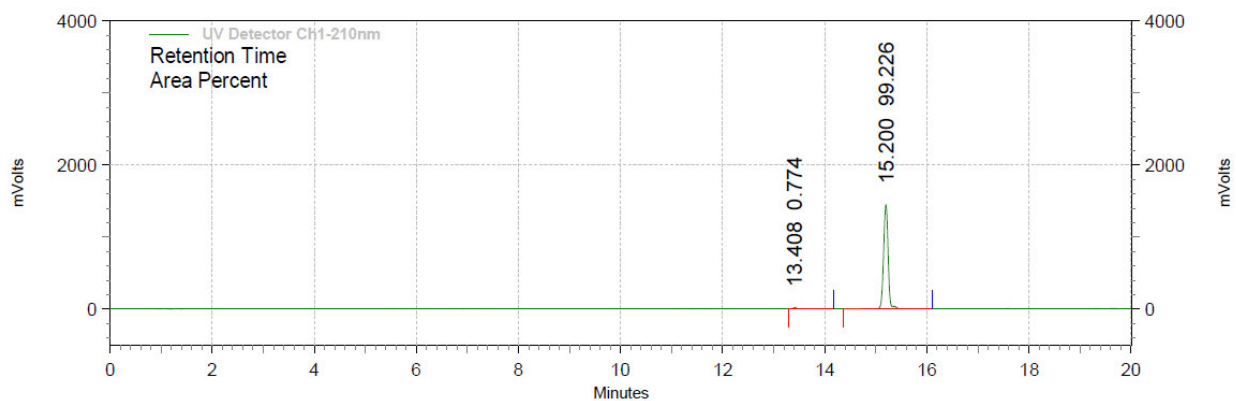

Condition (5) (Shimadzu LC-2010A): Kinetex F5, 2.6  $\mu$ m, 100  $\text{\AA}$ , 100 x 4.6 mm column, solvent A: H<sub>2</sub>O, solvent B: CH<sub>3</sub>CN, flow rate: 1.0 mL/min, t: 0-20 min, gradient: 5-95% solvent B, 25  $^{\circ}$ C.

**$\alpha$ -TAMSE-2 (98.8%)**

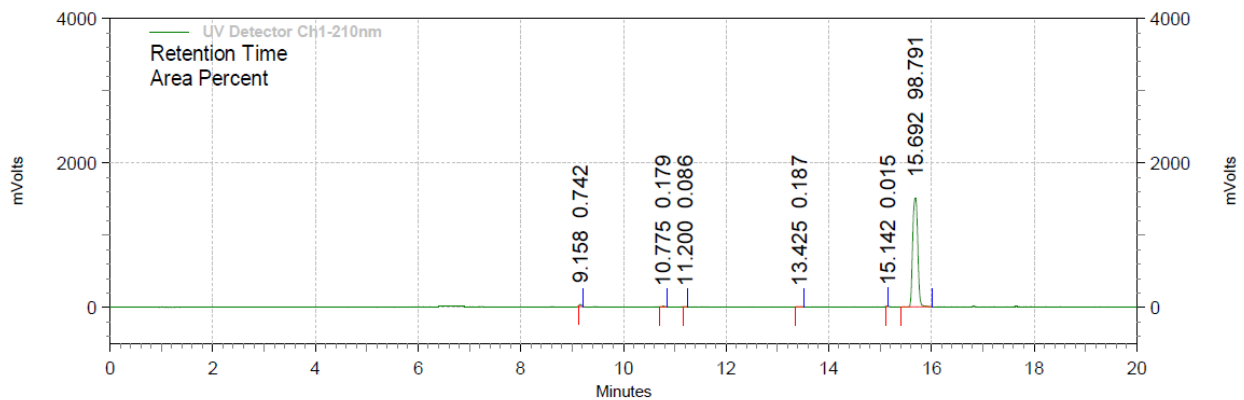

Condition (5) (Shimadzu LC-2010A): Kinetex F5, 2.6  $\mu\text{m}$ , 100  $\text{\AA}$ , 100 x 4.6 mm column, solvent A:  $\text{H}_2\text{O}$ , solvent B:  $\text{CH}_3\text{CN}$ , flow rate: 1.0 mL/min, t: 0-20 min, gradient: 5-95% solvent B, 25  $^\circ\text{C}$ .

**$\epsilon$ -202 (99.9%)**

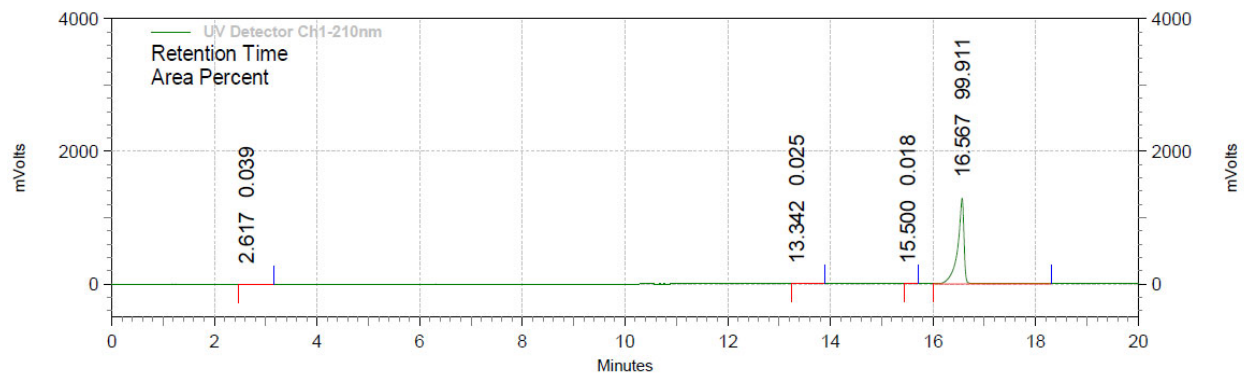

Condition (5) (Shimadzu LC-2010A): Kinetex F5, 2.6  $\mu\text{m}$ , 100  $\text{\AA}$ , 100 x 4.6 mm column, solvent A:  $\text{H}_2\text{O}$ , solvent B:  $\text{CH}_3\text{CN}$ , flow rate: 1.0 mL/min, t: 0-20 min, gradient: 5-95% solvent B, 25  $^\circ\text{C}$ .
